# Supplementary material
Source: publisher figshare collection journal article supplement (https://gsajournals.figshare.com/ndownloader/files/13528877)
Supplement: Supplementary file 1 [file 13528877]

## Sheet: SSBN5_vs_SS_n12
File S3. RNAseq gene expression data from mammary tumors that arose in the SS (n = 6) and SS-5BN rats (n = 6)
RSEM_ID	ensembl_gene_id	entrezgene	GeneSymbol	chr	start	end	SSBN5_vs_SS.L2FC	SSBN5_vs_SS.rawP	SSBN5_vs_SS.adjP	FCpattern	FDR010	FDR005	SS_rep1	SS_rep2	SS_rep3	SS_rep4	SS_rep5	SS_rep6	SSBN5_rep1	SSBN5_rep2	SSBN5_rep3	SSBN5_rep4	SSBN5_rep5	SSBN5_rep6
ENSRNOG00000040300_Raet1l	ENSRNOG00000040300	679825	Raet1e	1	1101965	1116926	0.201197	0.418144	0.848633	U	N	N	12.1806	15.6918	1.80272	12.7368	4.08994	0	31.2829	4.36219	16.0463	5.49565	8.47154	5.41687
ENSRNOG00000061316_LOC102547056	ENSRNOG00000061316	102547056	LOC102547056	1	1180932	1220916	-0.50781	0.0493046	0.492151	D	N	N	158.348	122.048	112.67	70.4768	97.3405	43.1479	49.7972	20.9385	38.5112	24.1809	104.2	94.4084
ENSRNOG00000023659_Raet1d	ENSRNOG00000023659	NA	AABR07000147.1	1	1454868	1474846	0.00951079	NA	NA	U	NA	NA	10.1505	12.2048	8.11226	9.34029	4.90792	6.16399	35.1134	1.74488	3.20927	1.09913	5.08292	4.64303
ENSRNOG00000014303_Lrp11	ENSRNOG00000014303	292462	Lrp11	1	1702696	1731210	-0.12011	0.399784	0.84142	D	N	N	93.3844	104.612	111.769	111.234	107.156	84.2412	91.2949	114.289	89.8595	79.1374	79.6325	110.659
ENSRNOG00000014330_Pcmt1	ENSRNOG00000014330	25604	Pcmt1	1	1736276	1767618	-0.0747658	0.692884	0.942247	D	N	N	296.394	159.534	191.089	110.385	130.06	154.1	183.867	145.697	158.324	164.87	164.348	153.22
ENSRNOG00000049505_Nup43	ENSRNOG00000049505	683983	Nup43	1	1771710	1782091	-0.354956	0.0851919	0.570512	D	N	N	324.815	156.047	170.357	189.353	127.606	322.582	126.408	171.87	146.557	196.744	140.628	161.732
ENSRNOG00000014916_Lats1	ENSRNOG00000014916	308265	Lats1	1	1784078	1817310	-0.0920179	0.51059	0.888315	D	N	N	475.043	772.388	612.926	723.448	732.098	548.595	635.234	492.927	658.969	511.096	658.239	662.406
ENSRNOG00000014996_Katna1	ENSRNOG00000014996	292464	Katna1	1	1825872	1867787	-0.164147	0.182659	0.709634	D	N	N	182.709	169.123	164.048	211.43	193.045	215.74	148.115	169.253	137.998	189.051	182.138	177.209
ENSRNOG00000015239_Ginm1	ENSRNOG00000015239	361448	Ginm1	1	1870388	1885981	-0.0688005	0.668224	0.933955	D	N	N	373.538	334.759	429.048	274.265	274.844	267.106	397.101	247.772	261.02	319.847	356.652	268.522
ENSRNOG00000015552_Ppil4	ENSRNOG00000015552	361449	Ppil4	1	1897338	1929763	0.0278128	0.797953	0.961426	U	N	N	231.431	305.991	253.283	292.946	332.921	283.544	296.23	287.032	254.602	317.649	286.338	303.345
ENSRNOG00000016041_Zc3h12d	ENSRNOG00000016041	308266	Zc3h12d	1	1938419	1972918	0.0296263	0.909882	0.985452	U	N	N	64.9631	87.1769	54.9831	134.161	195.499	20.5466	75.9727	18.3212	50.2785	96.7235	276.172	68.8717
ENSRNOG00000016054_Tab2	ENSRNOG00000016054	308267	Tab2	1	1999596	2073896	0.304746	0.036444	0.443454	U	N	N	495.344	877.872	631.855	581.646	723.919	489.01	682.477	745.934	831.2	854.025	820.892	869.021
ENSRNOG00000016381_Ust	ENSRNOG00000016381	361450	Ust	1	2333778	2627747	0.646687	0.00747904	0.215308	U	N	N	12.1806	21.7942	18.9286	7.64206	16.3597	12.328	23.6218	45.3668	21.3951	20.8835	28.8032	31.7274
ENSRNOG00000013160_Sash1	ENSRNOG00000013160	365037	Sash1	1	2782864	2846200	0.0288872	0.893427	0.983317	U	N	N	221.281	553.574	438.963	345.591	222.492	254.778	336.45	430.112	357.298	225.322	278.714	466.625
ENSRNOG00000023549_Samd5	ENSRNOG00000023549	365038	Samd5	1	3713750	3763392	-0.0671427	0.799292	0.961452	D	N	N	8.12039	9.58946	12.6191	11.0385	26.9936	2.05466	10.2148	8.72438	6.41853	14.2887	11.8602	16.2506
ENSRNOG00000013351_Stxbp5	ENSRNOG00000013351	81022	Stxbp5	1	3858909	4011511	0.0148274	0.934971	0.989544	U	N	N	235.491	370.502	262.296	443.239	402.45	217.794	293.676	320.185	362.647	242.908	386.302	359.835
ENSRNOG00000042741_Adgb	ENSRNOG00000042741	292477	Adgb	1	4445027	4560789	-0.338248	0.197482	0.724511	D	N	N	8.12039	32.2555	19.83	54.3435	31.9015	22.6013	11.4917	41.877	12.8371	14.2887	21.1789	10.8337
ENSRNOG00000014258_Rab32	ENSRNOG00000014258	365042	Rab32	1	4637491	4653210	-0.161813	0.501577	0.884801	D	N	N	629.33	291.171	467.807	177.466	332.103	186.974	335.812	293.139	150.836	462.734	291.421	240.664
ENSRNOG00000014450_Shprh	ENSRNOG00000014450	308282	Shprh	1	5240180	5313054	0.00611582	0.968928	0.995466	U	N	N	154.287	233.634	207.313	272.567	303.473	178.756	219.619	198.916	259.951	214.331	233.815	243.759
ENSRNOG00000014852_Fbxo30	ENSRNOG00000014852	308283	Fbxo30	1	5366379	5388069	-0.227916	0.0959026	0.592759	D	N	N	196.919	231.019	261.395	189.353	233.944	221.904	237.494	194.554	193.626	148.383	160.959	190.364
ENSRNOG00000040242_Epm2a	ENSRNOG00000040242	114005	Epm2a	1	5448958	5571512	0.447825	0.0774291	0.556619	U	N	N	6.09029	2.61531	3.60545	3.39647	4.90792	2.05466	5.74583	10.4693	19.2556	0	6.77723	10.0599
ENSRNOG00000051844_AABR07000248.1	ENSRNOG00000051844	NA	AABR07000248.1	1	6278881	6279793	-0.228463	0.377151	0.830366	D	N	N	6.09029	9.58946	7.2109	11.0385	17.1777	0	1.27685	4.36219	8.55805	3.29739	6.77723	11.6076
ENSRNOG00000011058_Utrn	ENSRNOG00000011058	25600	Utrn	1	6451810	6970040	0.116848	0.565449	0.905631	U	N	N	787.677	1386.98	1251.09	1633.7	1770.12	1058.15	1720.56	840.158	1896.68	1047.47	1533.35	1679.23
ENSRNOG00000014902_Stx11	ENSRNOG00000014902	292483	Stx11	1	7039162	7064870	0.105908	0.6603	0.931445	U	N	N	52.7825	36.6143	53.1804	44.1541	51.5332	32.8746	48.5204	20.9385	34.2322	98.9218	59.3008	41.0135
ENSRNOG00000014908_Sf3b5	ENSRNOG00000014908	680891	Sf3b5	1	7101715	7102426	-0.0714763	0.69246	0.941999	D	N	N	905.423	551.83	651.685	540.039	508.788	901.997	699.076	724.996	507.064	834.24	584.536	472.042
ENSRNOG00000025587_Plagl1	ENSRNOG00000025587	25157	Plagl1	1	7252349	7259035	-0.372549	0.150253	0.674987	D	N	N	16.2408	149.944	94.643	130.764	46.6253	238.341	44.6898	17.4488	151.905	21.9826	41.5105	92.0868
ENSRNOG00000015217_Ltv1	ENSRNOG00000015217	361452	Ltv1	1	7323040	7335936	0.102125	0.455596	0.865892	U	N	N	221.281	292.043	276.718	334.552	322.287	359.566	307.083	308.843	275.997	423.165	322.766	316.5
ENSRNOG00000015473_Phactr2	ENSRNOG00000015473	308291	Phactr2	1	7355154	7480825	0.269844	0.185959	0.713696	U	N	N	50.7524	59.2803	59.4899	41.6068	35.1734	51.3666	45.9667	48.8565	55.6273	101.12	62.6894	61.1333
ENSRNOG00000015551_Fuca2	ENSRNOG00000015551	292485	Fuca2	1	7658890	7673683	-0.218833	0.0991788	0.598925	D	N	N	290.304	217.071	329.898	265.774	296.111	367.785	293.037	241.665	250.323	248.404	235.509	223.639
ENSRNOG00000015660_Pex3	ENSRNOG00000015660	83519	Pex3	1	7685338	7726401	0.0640784	0.563994	0.905491	U	N	N	142.107	161.277	153.232	165.578	157.054	156.154	160.883	194.554	146.557	160.473	174.514	147.029
ENSRNOG00000010753_Aig1	ENSRNOG00000010753	292486	Aig1	1	7816838	8038665	-0.265699	0.10982	0.611679	D	N	N	487.223	341.734	401.106	315.023	332.921	355.457	404.124	388.235	235.346	265.99	276.172	237.569
ENSRNOG00000011015_Hivep2	ENSRNOG00000011015	29721	Hivep2	1	8310577	8333885	0.196944	0.274681	0.774218	U	N	N	229.401	527.42	350.63	436.446	426.171	271.216	430.937	321.93	484.599	467.131	492.197	442.636
ENSRNOG00000011411_Adgrg6	ENSRNOG00000011411	308376	Adgrg6	1	8593075	8751198	0.0142929	0.943862	0.990449	U	N	N	263.913	317.324	302.858	254.735	310.017	400.659	288.569	153.549	366.926	405.579	224.496	431.802
ENSRNOG00000011540_Vta1	ENSRNOG00000011540	292640	Vta1	1	8830411	8878244	-0.00448722	0.972043	0.995755	D	N	N	454.742	392.296	416.429	410.973	449.893	534.213	539.47	432.729	359.438	517.691	393.927	395.432
ENSRNOG00000060990_AABR07000382.1	ENSRNOG00000060990	NA	AABR07000382.1	1	11766992	11772215	0.0988057	0.685641	0.940229	U	N	N	0	12.2048	0	24.6244	22.9036	14.3826	6.38426	25.3007	22.4649	14.2887	18.6374	6.96455
ENSRNOG00000051831_5_8S_rRNA	ENSRNOG00000051831	NA	RF00002	1	11906441	11906593	-0.345128	0.158819	0.683972	D	N	N	101.505	43.5885	96.4457	81.5153	179.957	133.553	90.6565	101.203	103.766	68.1461	38.1219	45.6565
ENSRNOG00000047746_AABR07000398.1	ENSRNOG00000047746	NA	AABR07000398.1	1	11963836	11968939	-0.360721	0.118308	0.627221	D	N	N	10507.8	4133.06	8721.58	6128.93	9496.01	14690.8	7740.91	8546.4	5333.8	8052.23	5427.72	3166.55
ENSRNOG00000053888_5_8S_rRNA	ENSRNOG00000053888	NA	RF00002	1	11970092	11970244	-0.345128	0.158819	0.683972	D	N	N	101.505	43.5885	96.4457	81.5153	179.957	133.553	90.6565	101.203	103.766	68.1461	38.1219	45.6565
ENSRNOG00000059898_LOC100909599	ENSRNOG00000059898	100909599	LOC100909599	1	11982257	11995787	-0.126691	0.48968	0.879962	D	N	N	36.5417	29.6402	32.449	45.8523	34.3555	36.9839	33.8366	34.0251	34.2322	24.1809	34.7333	32.5012
ENSRNOG00000055789_AABR07000411.1	ENSRNOG00000055789	NA	AABR07000411.1	1	12006598	12136637	-0.426177	0.0758319	0.554466	D	N	N	30.4514	25.2813	19.83	22.0771	22.9036	65.7492	18.5144	20.0661	26.7439	19.7844	18.6374	13.9291
ENSRNOG00000062232_Mcc	ENSRNOG00000062232	307449	Mcc	1	12006660	12128845	-0.306904	0.216655	0.738209	D	N	N	20.301	25.2813	13.5204	13.5859	15.5418	47.2573	15.9606	14.8314	17.1161	20.8835	9.31869	16.2506
ENSRNOG00000056940_Cited2	ENSRNOG00000056940	114490	Cited2	1	12823363	12825786	-0.264476	0.241278	0.752864	D	N	N	233.461	846.488	451.582	337.949	400.814	398.605	349.219	227.706	351.95	380.299	271.936	517.698
ENSRNOG00000060021_Txlnb	ENSRNOG00000060021	308622	Txlnb	1	12915734	12961670	0.341372	NA	NA	U	NA	NA	20.301	4.35885	1.80272	5.94382	1.63597	4.10933	6.38426	2.61731	140.138	4.39652	0	6.19071
ENSRNOG00000060972_Heca	ENSRNOG00000060972	308624	Heca	1	13036909	13050644	-0.208708	0.217472	0.738731	D	N	N	570.457	883.974	978.879	609.666	619.216	532.158	759.727	499.034	481.39	579.242	595.549	650.799
ENSRNOG00000051450_Abracl	ENSRNOG00000051450	685045	Abracl	1	13165572	13175876	-0.320425	0.0850194	0.570512	D	N	N	913.543	536.138	710.273	526.453	534.964	628.727	579.691	642.114	304.88	600.125	428.66	406.266
ENSRNOG00000059224_Reps1	ENSRNOG00000059224	292944	Reps1	1	13212324	13298347	0.154709	0.211736	0.734035	U	N	N	251.732	286.812	290.239	274.265	337.011	277.38	298.145	425.75	300.601	312.153	286.338	309.536
ENSRNOG00000053347_Ccdc28a	ENSRNOG00000053347	361454	Ccdc28a	1	13384156	13395370	0.113285	0.427079	0.853268	U	N	N	64.9631	69.7415	67.6021	83.2135	85.8886	92.4599	82.3569	83.754	82.3712	103.318	77.9382	76.6101
ENSRNOG00000060603_Nhsl1	ENSRNOG00000060603	308631	Nhsl1	1	13595295	13705396	0.351996	0.104323	0.606876	U	N	N	712.564	805.515	832.858	731.939	790.993	339.019	887.412	424.877	1256.96	1127.71	1167.38	896.106
ENSRNOG00000053735_Hebp2	ENSRNOG00000053735	308632	Hebp2	1	13714440	13719829	0.018339	0.907637	0.984996	U	N	N	186.769	135.124	158.64	138.406	183.229	110.952	195.997	175.36	150.836	120.904	136.392	145.482
ENSRNOG00000011460_Arfgef3	ENSRNOG00000011460	292947	Arfgef3	1	13838707	13915594	-0.0257357	0.918594	0.987807	D	N	N	26.3913	54.9215	20.7313	75.5715	212.677	6.16399	59.3736	20.9385	139.068	10.9913	67.7723	81.2531
ENSRNOG00000011994_Perp	ENSRNOG00000011994	292949	Perp	1	14224393	14236846	-0.462285	0.000297225	0.0356397	D	Y	Y	4740.28	4204.54	4604.16	4676.09	3186.06	5068.86	3449.42	3793.36	3058.43	2693.97	2863.38	2942.91
ENSRNOG00000049517_Tnfaip3	ENSRNOG00000049517	683206	Tnfaip3	1	14402913	14412807	0.470015	0.0350021	0.436056	U	N	N	79.1738	129.022	137.007	116.329	119.426	57.5306	132.154	129.993	128.371	274.783	215.177	107.564
ENSRNOG00000012074_Ifngr1	ENSRNOG00000012074	116465	Ifngr1	1	15062432	15080907	-0.0336563	0.86443	0.977093	D	N	N	1908.29	2765.25	2898.78	1454.54	1166.45	1949.88	2394.1	1465.7	1657.05	2363.13	2086.54	1840.96
ENSRNOG00000012259_Il22ra2	ENSRNOG00000012259	444986	Il22ra2	1	15093599	15106954	-0.213545	0.367743	0.824545	D	N	N	2.0301	11.333	0.901362	8.49118	2.45396	24.656	1.27685	2.61731	2.13951	5.49565	5.93008	11.6076
ENSRNOG00000012322_Pex7	ENSRNOG00000012322	308718	Pex7	1	15311770	15374850	-0.27456	0.0296732	0.406251	D	N	N	125.866	99.3817	138.81	130.764	125.97	117.116	104.063	97.713	89.8595	112.111	105.894	93.6345
ENSRNOG00000031700_Map3k5	ENSRNOG00000031700	365057	Map3k5	1	15412603	15613746	0.215962	0.363673	0.822561	U	N	N	95.4145	147.329	103.657	148.596	272.39	86.2959	234.941	100.33	210.742	109.913	241.439	160.959
ENSRNOG00000012701_Map7	ENSRNOG00000012701	293016	Map7	1	15620653	15748203	-0.0785711	0.727229	0.945853	D	N	N	168.498	478.601	319.082	620.705	494.064	439.698	507.549	272.201	507.064	252.8	369.359	441.088
ENSRNOG00000058050_Bclaf1	ENSRNOG00000058050	293017	Bclaf1	1	15782477	15860624	0.236013	0.226991	0.744744	U	N	N	550.156	890.076	572.365	1112.34	1186.08	778.717	870.813	679.629	1173.52	1029.89	1236	1210.28
ENSRNOG00000013436_Pde7b	ENSRNOG00000013436	140929	Pde7b	1	15893533	16203909	0.722858	0.00555775	0.189055	U	N	N	26.3913	52.3062	38.7586	21.2279	27.8116	36.9839	54.2662	248.645	73.8131	42.8661	35.5805	58.0379
ENSRNOG00000013969_Ahi1	ENSRNOG00000013969	308923	Ahi1	1	16478127	16601769	0.265682	0.170589	0.696796	U	N	N	64.9631	103.741	96.4457	50.0979	122.698	57.5306	100.871	105.565	97.3478	100.021	114.366	107.564
ENSRNOG00000055858_Myb	ENSRNOG00000055858	NA	Myb	1	16659442	16687817	0.214438	0.415065	0.847745	U	N	N	44.6621	44.4602	68.5035	133.311	368.094	26.7106	121.939	139.59	176.51	106.616	225.343	165.602
ENSRNOG00000014531_Hbs1l	ENSRNOG00000014531	293408	Hbs1l	1	16819170	16896219	0.0820421	0.666151	0.93258	U	N	N	580.608	480.345	504.763	818.549	1094.47	604.071	591.821	797.408	861.153	634.199	876.804	611.333
ENSRNOG00000014907_Aldh8a1	ENSRNOG00000014907	685750	Aldh8a1	1	16910069	16930481	0.02067	0.937279	0.989916	U	N	N	6.09029	7.84592	9.91498	6.79294	9.81584	10.2733	11.4917	16.5763	5.34878	9.89218	2.54146	6.19071
ENSRNOG00000014979_Themis	ENSRNOG00000014979	498985	Themis	1	17171631	17378047	0.0824386	0.714978	0.945853	U	N	N	2.0301	4.35885	11.7177	0.849118	8.17987	0	5.74583	0	1.06976	12.0904	10.1658	6.96455
ENSRNOG00000047605_Ptprk	ENSRNOG00000047605	360302	Ptprk	1	17446417	18058055	0.17671	0.321092	0.803265	U	N	N	783.617	1681.64	1076.23	1119.99	1060.11	1228.69	1566.06	854.117	1598.21	1215.64	1283.44	1491.19
ENSRNOG00000046617_LOC103690149	ENSRNOG00000046617	103690149	LOC103690149	1	17602281	17625197	0.150741	0.545666	0.902299	U	N	N	10.1505	16.5636	15.3232	7.64206	12.2698	8.21865	9.57639	20.0661	16.0463	18.6852	10.1658	10.8337
ENSRNOG00000011134_Lama2	ENSRNOG00000011134	309368	Lama2	1	18491384	19143269	0.0781537	0.765072	0.952521	U	N	N	215.19	684.339	724.695	100.196	237.216	226.013	458.39	701.44	303.811	276.981	167.737	506.865
ENSRNOG00000011245_Arhgap18	ENSRNOG00000011245	293947	Arhgap18	1	19227121	19376301	0.0490379	0.770046	0.95373	U	N	N	172.558	237.121	231.65	149.445	186.501	170.537	198.55	279.18	155.115	163.771	219.413	179.531
ENSRNOG00000011720_L3mbtl3	ENSRNOG00000011720	309550	L3mbtl3	1	20022793	20097099	0.181903	0.422663	0.850349	U	N	N	48.7223	147.329	71.2076	155.389	165.233	78.0772	124.493	93.3508	147.626	129.697	160.959	140.065
ENSRNOG00000050801_AABR07000629.2	ENSRNOG00000050801	NA	AABR07000629.3	1	20238386	20243910	-0.153123	0.416311	0.848135	D	N	N	0	10.4612	29.7449	24.6244	55.6231	0	3.19213	27.918	0	0	15.2488	14.7029
ENSRNOG00000047783_Tmem200a	ENSRNOG00000047783	498987	Tmem200a	1	20331976	20412381	-0.395007	0.0715242	0.544639	D	N	N	265.943	348.708	386.684	443.239	335.375	219.849	200.466	133.483	258.881	268.188	402.398	147.029
ENSRNOG00000012346_Epb41l2	ENSRNOG00000012346	309557	Epb41l2	1	20893995	20962526	0.278063	0.177497	0.704687	U	N	N	562.337	796.797	570.562	754.016	796.719	1099.25	719.506	553.998	1328.64	824.348	987.782	1392.91
ENSRNOG00000013202_Akap7	ENSRNOG00000013202	361458	Akap7	1	21141970	21263850	0.155258	0.378437	0.831371	U	N	N	28.4214	46.2038	42.364	44.1541	44.9893	30.82	49.1588	41.0046	51.3483	39.5687	40.6634	54.1687
ENSRNOG00000055111_AABR07000658.1	ENSRNOG00000055111	100364016	AABR07000658.1	1	21145360	21146846	-0.0684509	0.793426	0.959427	D	N	N	324.815	150.816	62.194	210.581	141.512	417.097	54.2662	362.062	162.603	134.094	191.457	290.19
ENSRNOG00000013304_Arg1	ENSRNOG00000013304	29221	Arg1	1	21525421	21537863	0.118204	0.65265	0.930488	U	N	N	97.4446	271.12	68.5035	113.782	185.683	98.6239	437.322	137.845	83.4409	62.6505	175.361	77.3839
ENSRNOG00000013422_Med23	ENSRNOG00000013422	309565	Med23	1	21539765	21586910	-0.0334918	0.819161	0.966122	D	N	N	406.019	643.366	468.708	588.438	608.582	449.971	509.464	379.51	599.063	495.708	580.301	533.949
ENSRNOG00000013791_Enpp3	ENSRNOG00000013791	54410	Enpp3	1	21613148	21684480	-0.235468	0.364688	0.822632	D	N	N	1118.58	4763.35	2818.56	1680.4	319.015	2171.78	1437.1	1288.59	1935.19	1730.03	1214.82	2097.1
ENSRNOG00000013994_Enpp1	ENSRNOG00000013994	85496	Enpp1	1	21748261	21813371	-0.0891189	0.718642	0.945853	D	N	N	261.882	304.247	274.014	278.511	407.358	412.987	220.895	699.695	254.602	154.977	126.226	311.083
ENSRNOG00000015036_Ctgf	ENSRNOG00000015036	64032	Ctgf	1	21851660	21854773	0.244079	0.343324	0.810845	U	N	N	1664.68	1862.1	3834.39	2441.21	1362.77	2231.36	5187.85	978.003	2294.63	2614.83	5616.63	1064.8
ENSRNOG00000015321_Moxd1	ENSRNOG00000015321	294119	Moxd1	1	22124495	22206505	0.534028	NA	NA	U	NA	NA	16.2408	24.4095	39.6599	29.7191	10.6338	4.10933	7.66111	1427.31	56.6971	117.607	31.3447	13.1553
ENSRNOG00000015670_Stx7	ENSRNOG00000015670	60466	Stx7	1	22241661	22281788	-0.310403	0.0728122	0.547496	D	N	N	893.242	713.979	1050.09	628.347	562.775	700.64	678.647	489.438	510.273	829.844	502.362	547.104
ENSRNOG00000016219_Vnn1	ENSRNOG00000016219	29142	Vnn1	1	22614783	22625204	0.0939465	0.71917	0.945853	U	N	N	97.4446	55.7932	148.725	38.2103	44.9893	30.82	170.46	46.2392	58.8366	51.6592	97.4227	41.7873
ENSRNOG00000039865_Vnn3	ENSRNOG00000039865	498992	Vnn3	1	22649081	22661377	-0.154967	0.483434	0.875535	D	N	N	6.09029	12.2048	12.6191	8.49118	0	90.4052	8.29954	4.36219	31.0229	3.29739	5.93008	27.8582
ENSRNOG00000016371_Slc18b1	ENSRNOG00000016371	309570	Slc18b1	1	22705916	22748422	-0.0468604	0.772537	0.954301	D	N	N	115.715	144.714	191.089	137.557	132.514	115.061	112.363	170.998	156.184	105.517	135.545	133.874
ENSRNOG00000060376_LOC100910237	ENSRNOG00000060376	NA	LOC100910237	1	22757012	22758012	-0.272506	0.279029	0.776593	D	N	N	6.09029	13.9483	18.0272	20.3788	13.9058	12.328	6.38426	17.4488	11.7673	7.69392	11.8602	10.8337
ENSRNOG00000016411_Rps12	ENSRNOG00000016411	65139	Rps12	1	22758212	22760370	-0.279952	0.220032	0.740983	D	N	N	22205.2	12664.2	20290.6	12103.3	6736.94	20466.5	11055.6	19002.6	9637.43	15427.4	9297.52	8465.8
ENSRNOG00000048248_LOC100910446	ENSRNOG00000048248	100910446	LOC100910446	1	23543426	23556241	0.0708772	0.329942	0.806929	U	N	N	0	0	0	11.0385	0	0	0	0	55.6273	0	0	25.5367
ENSRNOG00000011114_Tbpl1	ENSRNOG00000011114	689030	Tbpl1	1	23977688	24002506	-0.269281	0.0496356	0.494031	D	N	N	247.672	195.276	236.157	204.637	157.871	232.177	172.375	167.508	154.045	217.628	159.265	164.054
ENSRNOG00000011161_Slc2a12	ENSRNOG00000011161	308028	Slc2a12	1	24003625	24056373	0.0231043	0.915653	0.986947	U	N	N	34.5116	40.9732	42.364	28.0209	27.8116	18.492	29.3676	46.2392	24.6044	32.9739	23.7203	41.7873
ENSRNOG00000011815_Sgk1	ENSRNOG00000011815	29517	Sgk1	1	24185435	24302298	0.595345	0.00943753	0.24052	U	N	N	475.043	949.357	1423.25	538.341	532.51	807.483	1524.56	1491	1807.89	1635.51	1061.48	712.706
ENSRNOG00000013323_Rnf217	ENSRNOG00000013323	292188	Rnf217	1	28301922	28390837	0.319351	0.0761873	0.555301	U	N	N	46.6922	64.5109	54.0817	44.1541	40.8994	30.82	56.8199	51.4738	69.5341	75.84	62.6894	54.9426
ENSRNOG00000021478_Tpd52l1	ENSRNOG00000021478	689256	Tpd52l1	1	28454966	28576553	-0.0191532	0.933986	0.989544	D	N	N	176.618	109.843	204.609	192.75	120.244	260.942	87.4644	313.205	164.742	161.572	190.61	125.362
ENSRNOG00000021442_Hddc2	ENSRNOG00000021442	361462	Hddc2	1	28579990	28600586	0.032943	0.835273	0.970663	U	N	N	136.016	109.843	111.769	84.0626	115.336	154.1	124.493	136.1	90.9292	134.094	127.073	105.242
ENSRNOG00000013364_Hey2	ENSRNOG00000013364	155430	Hey2	1	29191192	29201531	0.0977645	0.706019	0.943634	U	N	N	46.6922	21.7942	38.7586	7.64206	8.17987	26.7106	26.1755	19.1936	37.4414	35.1722	17.7902	29.4059
ENSRNOG00000014004_Ncoa7	ENSRNOG00000014004	498995	Ncoa7	1	29225707	29385199	0.201059	0.277355	0.775843	U	N	N	207.07	224.045	220.834	263.226	205.315	205.466	163.437	354.21	227.858	382.498	215.177	222.866
ENSRNOG00000014190_Hint3	ENSRNOG00000014190	246769	Hint3	1	29413365	29423347	-0.391799	0.0124775	0.275556	D	N	N	231.431	149.073	213.623	177.466	151.328	260.942	173.013	155.294	136.929	130.797	132.156	136.196
ENSRNOG00000014240_Trmt11	ENSRNOG00000014240	378794	Trmt11	1	29432152	29487473	0.0808416	0.624139	0.921558	U	N	N	62.933	99.3817	60.3912	84.9118	114.518	88.3505	90.0181	94.2233	87.72	90.1287	103.353	83.5746
ENSRNOG00000042944_Cenpw	ENSRNOG00000042944	689399	Cenpw	1	29915443	29920598	-0.390616	0.135699	0.656108	D	N	N	196.919	75.8439	35.1531	75.5715	54.8051	234.232	19.7912	119.524	36.3717	61.5513	59.3008	95.1822
ENSRNOG00000011568_Rspo3	ENSRNOG00000011568	498997	Rspo3	1	30681681	30766860	0.48952	NA	NA	U	NA	NA	10.1505	26.1531	25.2381	62.8347	130.06	10.2733	836.976	20.9385	33.1624	58.2539	76.2439	26.3105
ENSRNOG00000011588_Rnf146	ENSRNOG00000011588	308051	Rnf146	1	30863217	30873808	-0.166687	0.3389	0.80959	D	N	N	424.29	528.292	502.059	484.846	463.799	452.026	713.122	376.021	347.671	367.11	338.862	358.287
ENSRNOG00000011622_Echdc1	ENSRNOG00000011622	361465	Echdc1	1	30874418	30917882	0.0288377	0.905165	0.984684	U	N	N	560.307	364.4	448.878	561.267	1208.98	558.868	1286.43	598.492	372.275	553.962	556.58	442.636
ENSRNOG00000054753_AABR07000986.1	ENSRNOG00000054753	NA	AABR07000986.1	1	31000772	31004646	-0.264484	0.300024	0.792141	D	N	N	2.0301	7.84592	2.70409	16.1332	16.3597	4.10933	1.91528	4.36219	8.55805	1.09913	6.77723	8.51223
ENSRNOG00000042309_Soga3	ENSRNOG00000042309	292199	Kiaa0408L	1	31040142	31055453	0.0962668	0.714197	0.945774	U	N	N	6.09029	19.1789	22.534	67.9294	97.3405	43.1479	61.2889	95.9682	51.3483	19.7844	47.4406	22.4413
ENSRNOG00000012324_NEWGENE_1307525	ENSRNOG00000012324	108349256	Soga3	1	31066798	31122093	0.22416	0.274188	0.773737	U	N	N	0	0.871769	0.901362	6.79294	18.8137	0	32.5597	5.23463	8.55805	1.09913	16.0959	1.54768
ENSRNOG00000023407_Mrpl36	ENSRNOG00000023407	364656	Mrpl36	1	31261370	31262466	-0.125127	0.459975	0.866548	D	N	N	452.712	268.505	332.603	273.416	254.394	376.003	291.761	405.684	251.393	316.55	250.758	247.628
ENSRNOG00000023387_LOC679739	ENSRNOG00000023387	679739	LOC679739	1	31264755	31273159	-0.372714	0.0690124	0.540317	D	N	N	387.748	178.713	271.31	190.202	187.319	402.714	164.075	269.583	166.882	198.943	180.444	188.817
ENSRNOG00000028357_Lrrc14b	ENSRNOG00000028357	502225	Lrrc14b	1	31531143	31535314	0.252136	0.335239	0.807045	U	N	N	8.12039	5.23062	14.4218	7.64206	11.4518	8.21865	6.38426	12.2141	40.6507	7.69392	9.31869	6.19071
ENSRNOG00000012775_Ccdc127	ENSRNOG00000012775	308060	Ccdc127	1	31539215	31545559	0.0348875	0.818511	0.966122	U	N	N	79.1738	92.4075	100.953	62.8347	74.4368	88.3505	88.7412	89.8611	85.5805	80.2366	69.4666	95.956
ENSRNOG00000013331_Sdha	ENSRNOG00000013331	157074	Sdha	1	31545631	31570601	0.0362274	0.706796	0.943714	U	N	N	1447.46	1388.73	1525.1	1310.19	1414.3	1851.25	1552.01	1629.71	1498.73	1578.35	1350.36	1545.36
ENSRNOG00000014485_Pdcd6	ENSRNOG00000014485	308061	Pdcd6	1	31576183	31591849	-0.193644	0.107611	0.610363	D	N	N	844.52	597.162	758.947	652.122	589.769	848.576	646.087	651.711	565.901	685.858	595.549	561.807
ENSRNOG00000039776_Exoc3	ENSRNOG00000039776	252881	Exoc3	1	31700953	31731815	0.115187	0.343464	0.810845	U	N	N	365.417	309.478	259.592	305.682	353.37	406.823	388.163	332.399	356.229	407.778	359.193	318.822
ENSRNOG00000015465_Cep72	ENSRNOG00000015465	308064	Cep72	1	31835000	31864628	0.00754137	0.977026	0.996345	U	N	N	36.5417	25.2813	14.4218	25.4735	29.4475	55.4759	4.46898	51.4738	22.4649	24.1809	29.6504	53.3949
ENSRNOG00000015676_Brd9	ENSRNOG00000015676	308067	Brd9	1	31939585	31967915	-0.0118606	0.938941	0.989916	D	N	N	198.949	263.274	198.3	335.401	326.377	299.981	248.986	300.991	270.648	219.826	304.128	266.974
ENSRNOG00000015810_Trip13	ENSRNOG00000015810	292206	Trip13	1	31967978	32012919	-0.199252	0.420996	0.849862	D	N	N	190.829	84.5616	50.4763	78.1188	72.8008	158.209	38.3056	80.2643	63.1156	122.004	90.6455	116.076
ENSRNOG00000016103_Nkd2	ENSRNOG00000016103	308068	Nkd2	1	32058044	32084877	0.555819	0.0336213	0.430407	U	N	N	158.348	381.835	301.956	398.236	302.655	277.38	217.065	1974.33	818.363	237.412	381.219	251.498
ENSRNOG00000016372_Slc12a7	ENSRNOG00000016372	308069	Slc12a7	1	32086755	32141036	0.246466	0.161883	0.68631	U	N	N	724.744	740.132	747.229	999.411	1069.11	597.907	892.519	680.501	1306.17	1022.19	1222.44	822.591
ENSRNOG00000025327_Tert	ENSRNOG00000025327	301965	Tert	1	32251714	32272476	0.0869515	0.68698	0.940229	U	N	N	22.3311	33.1272	27.0409	44.1541	42.5353	18.492	27.4523	27.918	48.139	35.1722	37.2748	34.8228
ENSRNOG00000016923_Clptm1l	ENSRNOG00000016923	316916	Clptm1l	1	32281207	32297190	-0.165514	0.325514	0.804764	D	N	N	2068.67	1157.71	1596.31	1088.57	1276.88	1388.95	1444.76	1312.15	929.618	1568.46	1198.72	1070.99
ENSRNOG00000017930_Lpcat1	ENSRNOG00000017930	361467	Lpcat1	1	32379432	32429917	0.118948	0.414609	0.847679	U	N	N	499.404	316.452	271.31	371.914	342.737	373.949	333.897	396.959	396.879	418.769	347.333	474.363
ENSRNOG00000047971_LOC100910528	ENSRNOG00000047971	364656	LOC100910528	1	32570296	32570589	-0.169025	0.518781	0.892164	D	N	N	6.09029	14.8201	30.6463	28.87	14.7238	20.5466	37.6671	20.9385	2.13951	13.1896	6.77723	7.73839
ENSRNOG00000049394_LOC100912599	ENSRNOG00000049394	679739	LOC100912599	1	32573228	32581781	-0.372714	0.0690124	0.540317	D	N	N	387.748	178.713	271.31	190.202	187.319	402.714	164.075	269.583	166.882	198.943	180.444	188.817
ENSRNOG00000012720_Irx4	ENSRNOG00000012720	306655	Irx4	1	32634796	32643771	-0.197224	0.447266	0.862269	D	N	N	251.732	257.172	274.014	479.751	324.741	945.145	224.087	738.082	372.275	103.318	300.74	259.236
ENSRNOG00000012742_Irx2	ENSRNOG00000012742	306657	Irx2	1	33271977	33275540	0.187124	0.449217	0.862528	U	N	N	194.889	768.901	347.024	835.532	501.426	503.393	994.668	292.267	820.503	400.084	604.021	715.801
ENSRNOG00000033609_Irx1	ENSRNOG00000033609	306659	Irx1	1	33910912	33916741	-0.00858791	0.966786	0.995466	D	N	N	761.286	2100.09	1074.42	1696.54	1447.02	1908.78	1237.91	1150.75	1985.47	1774	1167.38	1611.13
ENSRNOG00000047117_AABR07001037.1	ENSRNOG00000047117	NA	AABR07001037.1	1	35151638	35157157	-0.754195	0.00253757	0.12994	D	N	N	38.5718	148.201	102.755	229.262	170.959	88.3505	48.5204	34.8975	78.0922	40.6678	71.1609	79.7054
ENSRNOG00000023053_Ice1	ENSRNOG00000023053	306665	Ice1	1	35280701	35319182	0.176682	0.461555	0.866718	U	N	N	142.107	451.577	243.368	580.796	496.518	228.068	326.874	293.139	602.272	315.451	493.891	525.437
ENSRNOG00000049434_AABR07001048.1	ENSRNOG00000049434	NA	AABR07001048.1	1	35526239	35527033	-0.393238	0.134708	0.654393	D	N	N	18.2709	33.1272	22.534	44.1541	36.8094	10.2733	11.4917	4.36219	24.6044	8.79305	25.4146	27.0844
ENSRNOG00000017150_Med10	ENSRNOG00000017150	290939	Med10	1	36107232	36112993	-0.0869229	0.504157	0.886293	D	N	N	286.244	264.146	258.691	264.076	235.58	334.91	273.885	270.456	215.021	292.369	280.408	198.877
ENSRNOG00000034075_Ube2ql1	ENSRNOG00000034075	679949	Ube2ql1	1	36185916	36226276	0.14657	0.579435	0.910366	U	N	N	4.06019	28.7684	14.4218	22.9262	17.1777	12.328	25.537	24.4283	37.4414	3.29739	11.8602	22.4413
ENSRNOG00000017254_Nsun2	ENSRNOG00000017254	361191	Nsun2	1	36295650	36319966	0.21798	0.0366373	0.444497	U	N	N	726.775	731.414	735.511	668.256	651.936	766.39	819.739	748.552	810.875	1071.65	771.757	784.673
ENSRNOG00000017601_Srd5a1	ENSRNOG00000017601	24950	Srd5a1	1	36320461	36354756	0.343772	0.18208	0.70914	U	N	N	119.776	74.1004	80.2212	91.7047	71.1649	162.318	87.4644	401.321	111.255	75.84	72.0081	140.839
ENSRNOG00000017613_Papd7	ENSRNOG00000017613	306672	Tent4a	1	36400443	36433238	-0.0140879	0.933208	0.989544	D	N	N	263.913	416.706	291.14	483.997	404.904	394.495	273.885	415.28	442.879	317.649	343.097	444.184
ENSRNOG00000032150_Adcy2	ENSRNOG00000032150	81636	Adcy2	1	37507276	37698390	0.525243	0.0427307	0.472599	U	N	N	28.4214	32.2555	25.2381	6.79294	12.2698	8.21865	34.475	36.6424	66.3249	23.0817	30.4975	21.6675
ENSRNOG00000027422_Fastkd3	ENSRNOG00000027422	290946	Fastkd3	1	37734403	37742932	-0.260556	0.0457527	0.482297	D	N	N	170.528	134.252	137.007	158.785	145.602	106.843	123.855	108.182	109.115	107.715	115.213	138.517
ENSRNOG00000017826_Mtrr	ENSRNOG00000017826	290947	Mtrr	1	37743147	37774015	0.150679	0.24035	0.752046	U	N	N	186.769	190.046	229.847	238.602	234.762	189.029	226.641	182.339	278.136	235.214	249.063	258.462
ENSRNOG00000042308_LOC680200	ENSRNOG00000042308	680200	LOC680200	1	37802592	37818879	-0.54531	0.00368718	0.156322	D	N	N	44.6621	40.1014	60.3912	50.9471	52.3512	47.2573	36.3903	37.5148	20.3254	38.4696	30.4975	27.0844
ENSRNOG00000051377_Zfp874b	ENSRNOG00000051377	NA	AABR07001099.2	1	37853553	37863756	-0.200384	0.305015	0.794228	D	N	N	52.7825	122.919	118.078	105.291	98.9764	78.0772	75.9727	109.055	86.6502	62.6505	97.4227	63.4548
ENSRNOG00000017963_RGD1566325	ENSRNOG00000017963	NA	AABR07001099.1	1	37878516	37886675	0.210474	0.39884	0.840876	U	N	N	12.1806	55.7932	58.5885	18.6806	29.4475	20.5466	40.8593	31.4078	55.6273	38.4696	38.9691	44.1088
ENSRNOG00000049259_LOC102549842	ENSRNOG00000049259	102549842	LOC102549842	1	37896780	37957412	0.113215	0.576774	0.909665	U	N	N	58.8728	115.074	109.065	81.5153	120.244	71.9132	116.194	54.9636	106.976	102.219	113.519	126.136
ENSRNOG00000016462_LOC102547287	ENSRNOG00000016462	102547287	LOC102547287	1	37928102	37932084	-0.184972	0.21074	0.734035	D	N	N	66.9932	107.228	93.7416	101.045	102.248	71.9132	86.8259	67.1777	84.5107	76.9392	85.5626	81.2531
ENSRNOG00000047145_LOC102551340	ENSRNOG00000047145	102551340	LOC102551340	1	38527519	38538987	-0.158464	0.527836	0.896037	D	N	N	28.4214	88.9205	49.5749	106.14	105.52	32.8746	47.8819	30.5353	87.72	47.2626	69.4666	70.4194
ENSRNOG00000046353_LOC501406	ENSRNOG00000046353	NA	LOC501406	1	38582629	38586563	-0.122603	0.613803	0.918681	D	N	N	6.09029	21.7942	22.534	18.6806	21.2677	12.328	16.5991	8.72438	22.4649	16.487	15.2488	16.2506
ENSRNOG00000016368_Ppp1r14c	ENSRNOG00000016368	171010	Ppp1r14c	1	39811314	39923057	0.114317	0.663482	0.932102	U	N	N	556.246	168.251	334.405	134.161	163.597	106.843	279.631	41.877	269.578	524.285	232.967	355.192
ENSRNOG00000016011_Plekhg1	ENSRNOG00000016011	679812	Plekhg1	1	40389638	40520447	-0.0365956	0.877633	0.979498	D	N	N	69.0233	256.3	104.558	164.729	79.3447	88.3505	91.2949	88.1162	149.766	117.607	149.099	145.482
ENSRNOG00000019582_Mthfd1l	ENSRNOG00000019582	361472	Mthfd1l	1	40529045	40719391	0.413736	0.0385757	0.453856	U	N	N	343.086	322.555	259.592	310.777	418.809	238.341	453.282	225.961	391.531	585.837	625.2	402.396
ENSRNOG00000019549_Akap12	ENSRNOG00000019549	83425	Akap12	1	40816107	40906581	0.0100112	0.968428	0.995466	U	N	N	198.949	237.993	438.963	205.486	68.7109	149.99	264.308	258.242	220.37	105.517	134.697	331.977
ENSRNOG00000019544_Zbtb2	ENSRNOG00000019544	308126	Zbtb2	1	40914171	40921508	-0.0724132	0.596959	0.914181	D	N	N	77.1437	122.919	133.402	143.501	134.15	135.608	128.324	112.544	116.603	108.814	125.379	123.04
ENSRNOG00000019501_Rmnd1	ENSRNOG00000019501	292268	Rmnd1	1	40948847	40972826	0.0274203	0.867654	0.977533	U	N	N	148.197	189.174	146.922	236.055	156.236	199.302	127.047	162.273	194.696	225.322	196.54	197.329
ENSRNOG00000019489_Armt1	ENSRNOG00000019489	292267	Armt1	1	40982862	41006371	-0.204048	0.147507	0.670822	D	N	N	172.558	149.073	180.272	140.104	132.514	117.116	113.001	124.759	121.952	162.671	114.366	131.553
ENSRNOG00000024280_Ccdc170	ENSRNOG00000024280	292266	Ccdc170	1	41034308	41126043	-0.123306	0.639671	0.926093	D	N	N	6.09029	20.9225	3.60545	9.34029	16.3597	8.21865	10.8532	8.72438	13.9068	5.49565	10.1658	7.73839
ENSRNOG00000019358_Esr1	ENSRNOG00000019358	24890	Esr1	1	41192824	41594796	0.450853	0.0786913	0.560301	U	N	N	150.227	165.636	381.276	155.389	412.265	28.7653	1175.98	80.2643	606.551	149.482	574.37	207.389
ENSRNOG00000055166_Rn50_1_0430.2	ENSRNOG00000055166	NA	AABR07001382.2	1	41594112	41594799	-0.0923497	0.718225	0.945853	D	N	N	77.1437	72.3569	263.198	151.992	139.058	67.8039	227.918	127.376	93.0687	83.534	115.213	51.0734
ENSRNOG00000018960_Syne1	ENSRNOG00000018960	499010	AABR07001382.1	1	41608418	42077535	0.085564	0.71754	0.945853	U	N	N	162.408	274.607	222.636	372.763	538.235	242.45	221.534	234.686	553.064	216.529	326.154	423.29
ENSRNOG00000018858_Myct1	ENSRNOG00000018858	292264	Myct1	1	42121636	42131547	-0.0753025	0.767813	0.953288	D	N	N	58.8728	49.6909	92.8403	28.87	17.1777	47.2573	54.9046	77.647	41.7205	24.1809	33.039	37.9181
ENSRNOG00000053113_Rn50_1_0435.2	ENSRNOG00000053113	NA	AABR07001389.1	1	42133308	42134374	-0.492271	0.0550348	0.51229	D	N	N	131.956	92.4075	242.466	73.0241	44.9893	78.0772	80.4417	110.8	50.2785	31.8748	39.8162	64.2286
ENSRNOG00000024077_Fbxo5	ENSRNOG00000024077	292263	Fbxo5	1	42461291	42467586	-0.514918	0.0416658	0.469688	D	N	N	162.408	81.9463	43.2654	102.743	76.8908	184.92	22.9833	71.5399	41.7205	70.3444	61.8422	99.0514
ENSRNOG00000018773_Mtrf1l	ENSRNOG00000018773	361473	Mtrf1l	1	42475792	42486035	-0.109133	0.471534	0.871562	D	N	N	77.1437	74.1004	82.0239	91.7047	82.6167	94.5145	61.9273	90.7335	96.278	65.9479	70.3138	77.3839
ENSRNOG00000059050_Gm5414	ENSRNOG00000059050	NA	AABR07001416.1	1	42967295	42971208	0.364792	0.0315012	0.418509	U	N	N	117.746	6.10239	15.3232	27.1718	4.90792	4.10933	773.134	2.61731	59.9063	6.59479	130.462	44.8827
ENSRNOG00000060413_AABR07001416.3	ENSRNOG00000060413	NA	AABR07001416.3	1	42980623	42981544	0.366367	0.0401504	0.46292	U	N	N	36.5417	2.61531	2.70409	11.8876	2.45396	2.05466	209.404	0	25.6741	1.09913	44.8992	9.28607
ENSRNOG00000059866_Rn60_1_0436.1	ENSRNOG00000059866	NA	AABR07001432.1	1	43563457	43563998	0.378597	0.141519	0.663812	U	N	N	12.1806	21.7942	23.4354	9.34029	20.4497	8.21865	49.1588	20.0661	16.0463	26.3791	22.8732	14.7029
ENSRNOG00000018163_Ipcef1	ENSRNOG00000018163	361474	Ipcef1	1	43567842	43638161	0.603099	0.0194898	0.346223	U	N	N	2.0301	5.23062	10.8163	4.24559	17.9957	4.10933	51.7125	5.23463	13.9068	23.0817	26.2618	10.0599
ENSRNOG00000018052_Cnksr3	ENSRNOG00000018052	308113	Cnksr3	1	43789791	43884267	-0.164299	0.179672	0.706721	D	N	N	162.408	202.25	204.609	164.729	161.961	158.209	164.075	154.421	185.068	136.292	144.016	156.315
ENSRNOG00000004144_AABR07001435.1	ENSRNOG00000004144	NA	AABR07001435.1	1	43933275	43934512	0.107422	0.525023	0.895083	U	N	N	44.6621	75.8439	69.4049	74.7223	62.985	71.9132	63.8426	60.1982	59.9063	95.6244	81.3268	79.7054
ENSRNOG00000016919_Scaf8	ENSRNOG00000016919	245926	Scaf8	1	44019059	44120615	0.089395	0.496179	0.884599	U	N	N	487.223	693.057	538.113	532.397	638.848	470.518	625.657	444.943	663.249	607.819	641.296	620.619
ENSRNOG00000016728_Tiam2	ENSRNOG00000016728	100362710	Tiam2	1	44311513	44433193	0.23429	0.322507	0.80328	U	N	N	28.4214	75.8439	73.9117	65.3821	31.9015	67.8039	41.4977	68.9226	105.906	47.2626	74.5496	95.1822
ENSRNOG00000056223_Tfb1m	ENSRNOG00000056223	308140	Tfb1m	1	44433116	44474674	-0.406241	0.0257279	0.389273	D	N	N	123.836	84.5616	140.612	118.876	107.974	160.264	81.7185	83.754	56.6971	117.607	84.7154	102.147
ENSRNOG00000017030_Arid1b	ENSRNOG00000017030	NA	Arid1b	1	45923222	46234874	0.100772	0.573697	0.908458	U	N	N	318.725	639.007	507.467	752.318	827.803	523.939	674.816	569.702	731.713	640.793	598.091	666.275
ENSRNOG00000016973_Tmem242	ENSRNOG00000016973	292228	Tmem242	1	46302970	46329682	-0.0873429	0.570863	0.908046	D	N	N	146.167	126.407	152.33	149.445	128.424	189.029	119.386	191.936	131.58	140.689	112.671	132.326
ENSRNOG00000029049_Zdhhc14	ENSRNOG00000029049	499014	Zdhhc14	1	46378807	46649292	0.00020128	0.999241	0.999657	U	N	N	119.776	101.997	89.2348	70.4768	142.33	71.9132	84.2722	84.6265	69.5341	160.473	120.296	78.9316
ENSRNOG00000046874_Snx9	ENSRNOG00000046874	683687	Snx9	1	46779860	46825830	0.18417	0.238941	0.751634	U	N	N	290.304	317.324	329.898	243.697	267.482	207.521	407.954	225.089	315.578	276.981	346.486	338.942
ENSRNOG00000017114_Synj2	ENSRNOG00000017114	84018	Synj2	1	46835971	46932529	0.0262656	0.897643	0.983317	U	N	N	385.718	496.037	362.347	705.617	705.105	474.627	644.172	379.51	609.761	305.558	644.684	619.845
ENSRNOG00000017889_Serac1	ENSRNOG00000017889	499015	Serac1	1	46942192	46978261	-0.0439068	0.821115	0.966496	D	N	N	30.4514	42.7167	36.0545	49.2488	47.4432	34.9293	32.5597	36.6424	49.2088	28.5774	38.1219	51.8472
ENSRNOG00000018007_Gtf2h5	ENSRNOG00000018007	502227	Gtf2h5	1	46978458	46985032	-0.321886	0.0681224	0.540317	D	N	N	619.179	384.45	475.018	483.997	365.64	710.914	384.332	556.615	353.019	350.623	332.084	365.252
ENSRNOG00000018012_Tulp4	ENSRNOG00000018012	499016	Tulp4	1	47032113	47127035	0.51169	0.0201115	0.34984	U	N	N	166.468	297.273	237.96	154.539	252.758	106.843	386.248	216.365	447.158	193.447	337.167	351.323
ENSRNOG00000018158_Tmem181	ENSRNOG00000018158	502228	Tmem181	1	47162394	47202549	0.0687718	0.616311	0.919357	U	N	N	454.742	311.222	403.81	262.377	338.647	357.511	401.57	302.736	369.066	360.515	400.704	393.884
ENSRNOG00000018207_Dynlt1	ENSRNOG00000018207	83462	Dynlt1	1	47206895	47213749	-0.222796	0.296849	0.789729	D	N	N	990.687	443.731	512.875	578.249	539.053	930.763	438.599	917.804	427.902	595.729	459.157	440.314
ENSRNOG00000018321_Sytl3	ENSRNOG00000018321	499017	Sytl3	1	47231093	47287371	-0.0259973	0.911448	0.985452	D	N	N	36.5417	51.4344	27.9422	61.1365	51.5332	98.6239	31.2829	54.9636	66.3249	38.4696	70.3138	54.9426
ENSRNOG00000018524_Ezr	ENSRNOG00000018524	54319	Ezr	1	47287874	47331412	0.400906	0.0486255	0.492141	U	N	N	2062.58	3175.86	2686.96	4512.21	3990.96	3359.37	7724.95	3154.73	4133.54	3840.36	5081.23	3871.52
ENSRNOG00000018762_Rsph3	ENSRNOG00000018762	361476	Rsph3	1	47426258	47477524	-0.0796229	0.724708	0.945853	D	N	N	16.2408	25.2813	26.1395	42.4559	28.6295	20.5466	21.0681	35.7699	32.0927	18.6852	23.7203	21.6675
ENSRNOG00000018915_Tagap	ENSRNOG00000018915	308097	Tagap	1	47493994	47502952	0.275969	0.293254	0.786364	U	N	N	83.234	65.3827	123.487	61.1365	114.518	36.9839	121.301	32.2802	43.86	306.658	127.073	69.6455
ENSRNOG00000018935_RGD1560015	ENSRNOG00000018935	499018	RGD1560015	1	47587021	47588122	-0.201238	0.435787	0.859213	D	N	N	36.5417	18.3072	20.7313	11.8876	22.9036	51.3666	19.1528	41.0046	16.0463	25.28	10.1658	11.6076
ENSRNOG00000030210_Fndc1	ENSRNOG00000030210	308099	Fndc1	1	47605262	47687504	-0.17912	0.464292	0.868743	D	N	N	960.236	1668.57	2340.84	785.434	1877.28	1594.42	2515.4	551.381	939.245	1494.82	1262.26	930.928
ENSRNOG00000019048_Sod2	ENSRNOG00000019048	24787	Sod2	1	47914759	47921587	0.202298	0.418568	0.848877	U	N	N	1756.03	1219.61	1513.39	1065.64	816.351	1604.69	1146.61	936.126	952.083	4326.18	1324.1	1194.03
ENSRNOG00000019091_Wtap	ENSRNOG00000019091	499020	Wtap	1	47942500	47967631	-0.153096	0.0931328	0.584681	D	N	N	779.557	956.331	941.923	903.461	808.171	860.904	776.964	746.807	727.434	917.774	726.858	821.043
ENSRNOG00000019189_Acat2	ENSRNOG00000019189	308100	Acat2	1	47972399	47992653	0.099915	0.670033	0.935054	U	N	N	253.762	81.9463	122.585	123.971	157.054	226.013	176.844	150.059	89.8595	285.774	145.71	205.841
ENSRNOG00000013975_Acat2l1	ENSRNOG00000013975	365096	Acat2l1	1	47996521	48026268	-0.151521	0.505472	0.886787	D	N	N	127.896	66.2545	50.4763	87.4591	72.8008	125.334	61.9273	102.075	40.6507	109.913	65.2309	75.0624
ENSRNOG00000014160_Tcp1	ENSRNOG00000014160	24818	Tcp1	1	48025663	48033396	-0.17079	0.252162	0.760054	D	N	N	2795.44	1802.82	2046.99	1831.55	1929.63	2880.64	1906.98	2058.08	1539.38	2359.83	1823.08	1967.1
ENSRNOG00000014582_Mrpl18	ENSRNOG00000014582	292244	Mrpl18	1	48033768	48038726	-0.308559	0.112902	0.617146	D	N	N	700.383	318.196	374.065	316.721	301.019	583.524	342.196	383.873	287.764	369.308	315.141	298.702
ENSRNOG00000023140_Pnldc1	ENSRNOG00000023140	361478	Pnldc1	1	48039909	48058400	-0.162757	0.515626	0.889609	D	N	N	2.0301	6.97415	13.5204	13.5859	31.9015	4.10933	2.5537	1.74488	12.8371	4.39652	9.31869	22.4413
ENSRNOG00000014997_Igf2r	ENSRNOG00000014997	25151	Igf2r	1	48176106	48264477	0.287936	0.0407919	0.466949	U	N	N	2007.77	1937.94	1930.72	1790.79	2110.41	1933.44	3015.29	1539.85	2705.41	2160.89	2566.88	2549.03
ENSRNOG00000022946_Slc22a3	ENSRNOG00000022946	29504	Slc22a3	1	48433079	48521256	0.270355	0.296057	0.789176	U	N	N	22.3311	19.1789	20.7313	5.09471	0.817987	2.05466	19.1528	25.3007	10.6976	14.2887	16.0959	23.989
ENSRNOG00000017223_Plg	ENSRNOG00000017223	85253	Plg	1	48521772	48563776	0.0474465	0.857019	0.974997	U	N	N	10.1505	30.5119	18.0272	23.7753	14.7238	8.21865	5.74583	25.3007	48.139	10.9913	6.77723	19.346
ENSRNOG00000017412_AABR07001512.1	ENSRNOG00000017412	NA	AABR07001512.1	1	48565160	48565711	-0.179171	0.490179	0.880018	D	N	N	89.3242	19.1789	22.534	16.1332	17.9957	63.6946	23.6218	44.4943	19.2556	26.3791	29.6504	33.2751
ENSRNOG00000017419_Map3k4	ENSRNOG00000017419	308106	Map3k4	1	48625743	48711642	0.336779	0.002034	0.11388	U	N	N	296.394	353.938	343.419	262.377	374.638	306.145	395.824	367.296	448.228	437.454	426.118	410.135
ENSRNOG00000017731_Agpat4	ENSRNOG00000017731	170919	Agpat4	1	48719633	48825364	0.11524	0.643251	0.927017	U	N	N	412.11	143.842	219.031	258.981	255.212	376.003	397.739	677.012	167.952	246.205	197.387	186.495
ENSRNOG00000048297_LOC108348175	ENSRNOG00000048297	499022	LOC108348175	1	50828134	51052340	0.332375	0.0440218	0.47698	U	N	N	280.153	258.044	286.633	186.806	214.313	141.772	287.93	230.324	346.601	278.08	310.058	323.465
ENSRNOG00000011310_Pde10a	ENSRNOG00000011310	63885	Pde10a	1	52360296	52544450	0.207152	0.426395	0.85305	U	N	N	18.2709	15.6918	20.7313	11.0385	15.5418	4.10933	11.4917	35.7699	14.9766	13.1896	9.31869	26.3105
ENSRNOG00000024140_Sft2d1	ENSRNOG00000024140	292305	Sft2d1	1	52998529	53014466	-0.123485	0.329155	0.806439	D	N	N	580.608	537.01	643.572	619.007	585.679	546.541	656.94	494.672	450.367	527.583	647.226	429.481
ENSRNOG00000012415_Mpc1	ENSRNOG00000012415	171087	Mpc1	1	53026608	53038229	-0.60041	0.00250512	0.128736	D	N	N	1242.42	650.34	1024.85	832.135	670.749	1354.02	609.697	839.285	422.553	648.487	438.826	526.984
ENSRNOG00000012964_Ccr6	ENSRNOG00000012964	308163	Ccr6	1	53065025	53087474	0.067878	0.778194	0.956392	U	N	N	18.2709	2.61531	19.83	4.24559	8.17987	0	18.5144	0.872438	4.27902	17.5861	15.2488	5.41687
ENSRNOG00000055093_Fgfr1op	ENSRNOG00000055093	683722	Fgfr1op	1	53122322	53152866	-0.210543	0.243133	0.754835	D	N	N	107.595	190.917	143.317	230.96	212.677	174.646	118.747	189.319	125.161	158.275	175.361	135.422
ENSRNOG00000013190_Rnaset2	ENSRNOG00000013190	292306	Rnaset2	1	53174879	53192048	-0.165354	0.329979	0.806929	D	N	N	1721.52	1206.53	1535.02	972.24	1277.7	1873.85	1386.02	1476.16	1015.2	1558.57	1070.8	1023.79
ENSRNOG00000013194_Rps6ka2	ENSRNOG00000013194	117269	Rps6ka2	1	53360157	53499445	0.127561	0.483895	0.875806	U	N	N	176.618	128.15	159.541	101.894	101.43	102.733	119.386	187.574	174.37	111.012	135.545	123.04
ENSRNOG00000023753_Afdn	ENSRNOG00000023753	26955	Afdn	1	53715693	53802658	0.257389	0.18857	0.715287	U	N	N	186.769	479.473	312.773	348.138	302.655	191.084	376.671	348.103	478.181	297.864	354.958	412.456
ENSRNOG00000022921_Dact2	ENSRNOG00000022921	308212	Dact2	1	56159426	56168351	-0.0301743	0.888294	0.982547	D	N	N	152.257	436.756	251.48	325.212	148.056	267.106	254.732	322.802	292.043	213.231	190.61	270.07
ENSRNOG00000014166_Smoc2	ENSRNOG00000014166	292401	Smoc2	1	56242346	56374120	0.263521	0.31233	0.798409	U	N	N	1189.64	2423.52	3818.17	590.986	943.139	1206.09	4551.34	3341.44	1239.85	1115.62	1526.57	2302.95
ENSRNOG00000010529_Thbs2	ENSRNOG00000010529	292406	Thbs2	1	56653938	56683731	-0.0630267	0.810551	0.964045	D	N	N	694.293	872.641	1128.51	122.273	321.469	291.762	992.114	524.335	147.626	641.892	317.683	529.306
ENSRNOG00000015609_Wdr27	ENSRNOG00000015609	308222	Wdr27	1	56808450	56942556	-0.0260536	0.920287	0.98791	D	N	N	12.1806	18.3072	18.9286	32.2665	44.9893	10.2733	28.0907	15.7039	34.2322	13.1896	33.039	12.3814
ENSRNOG00000015597_LOC100125364	ENSRNOG00000015597	100125364	LOC100125364	1	56949712	56952431	-0.347225	0.0191655	0.345579	D	N	N	231.431	278.094	278.521	339.647	291.203	262.997	289.207	202.406	205.393	156.077	237.203	203.52
ENSRNOG00000061312_Phf10	ENSRNOG00000061312	292404	Phf10	1	56951518	56967895	-0.0395003	0.725354	0.945853	D	N	N	426.32	350.451	373.164	416.917	382.818	515.721	340.919	441.453	390.461	417.67	381.219	410.135
ENSRNOG00000015230_Ermard	ENSRNOG00000015230	361485	Ermard	1	56982821	57001665	-0.340122	0.150432	0.675539	D	N	N	75.1136	91.5358	63.0953	209.732	139.058	119.17	53.6278	89.8611	111.255	51.6592	112.671	85.8961
ENSRNOG00000059984_Dll1	ENSRNOG00000059984	84010	Dll1	1	57318708	57327379	-0.0550206	0.797903	0.961426	D	N	N	270.003	216.199	274.915	341.345	211.859	536.267	243.24	291.394	386.182	187.951	242.286	405.492
ENSRNOG00000058790_Fam120b	ENSRNOG00000058790	308218	Fam120b	1	57345577	57392113	0.118266	0.191859	0.717988	U	N	N	306.545	327.785	349.728	352.384	368.912	306.145	396.462	342.868	366.926	370.407	331.237	394.658
ENSRNOG00000001488_Psmb1	ENSRNOG00000001488	94198	Psmb1	1	57470632	57489727	-0.222622	0.270859	0.772636	D	N	N	3912	1994.61	2686.06	2179.68	1745.58	3441.56	2141.28	3082.32	1576.82	2798.39	1953.54	1660.66
ENSRNOG00000001489_Tbp	ENSRNOG00000001489	117526	Tbp	1	57491643	57508449	-0.318059	0.00741533	0.215308	D	N	N	136.016	151.688	141.514	144.35	146.42	152.045	128.962	126.503	97.3478	115.409	97.4227	123.04
ENSRNOG00000001490_Pdcd2	ENSRNOG00000001490	58934	Pdcd2	1	57512968	57518458	-0.174563	0.258127	0.764552	D	N	N	300.454	263.274	310.068	271.718	205.315	384.222	233.664	287.032	217.16	317.649	218.566	236.021
ENSRNOG00000021493_Prdm9	ENSRNOG00000021493	365155	Prdm9	1	57533577	57555048	-0.295935	0.221898	0.741227	D	N	N	6.09029	4.35885	9.01362	22.0771	6.5439	53.4213	1.91528	7.85194	14.9766	1.09913	7.62439	18.5721
ENSRNOG00000014434_Chd1	ENSRNOG00000014434	308215	Chd1	1	57692836	57755485	0.312615	0.108894	0.610756	U	N	N	229.401	371.374	237.96	333.703	399.996	182.865	374.756	232.068	448.228	356.118	445.603	429.481
ENSRNOG00000048190_Rgmb	ENSRNOG00000048190	681433	Rgmb	1	57796709	57815038	0.101105	0.593797	0.912929	U	N	N	85.2641	129.022	127.993	76.4206	59.7131	88.3505	99.5944	130.866	108.045	103.318	88.9512	87.4438
ENSRNOG00000056478_AABR07001807.1	ENSRNOG00000056478	NA	AABR07001807.1	1	58339947	58345450	-0.576876	0.0193212	0.346223	D	N	N	0	21.7942	16.2245	28.87	22.0856	26.7106	2.5537	0.872438	11.7673	2.19826	5.93008	13.1553
ENSRNOG00000012692_Riok2	ENSRNOG00000012692	308201	Riok2	1	59129951	59146776	0.0113824	0.926631	0.989268	U	N	N	294.364	227.532	230.749	231.809	211.041	326.692	259.839	271.328	247.114	262.692	250.758	223.639
ENSRNOG00000012988_Lix1	ENSRNOG00000012988	292381	Lix1	1	59156251	59214452	0.151176	0.492573	0.882378	U	N	N	18.2709	17.4354	2.70409	8.49118	9.81584	4.10933	1.91528	65.4328	2.13951	23.0817	2.54146	0.773839
ENSRNOG00000047387_Lnpep	ENSRNOG00000047387	171105	Lnpep	1	59297294	59347472	0.024873	0.920993	0.988009	U	N	N	0	84.5616	87.4321	12.7368	29.4475	24.656	43.413	14.8314	71.6736	18.6852	81.3268	23.2152
ENSRNOG00000039076_LOC688452	ENSRNOG00000039076	688452	Spaca6	1	59704998	59715763	0.0197834	0.938315	0.989916	U	N	N	6.09029	10.4612	6.30953	34.8138	7.36188	4.10933	5.10741	14.8314	22.4649	1.09913	18.6374	11.6076
ENSRNOG00000011282_Ppp2r1a	ENSRNOG00000011282	117281	Ppp2r1a	1	60717386	60736609	0.0441932	0.715099	0.945853	U	N	N	2754.84	2110.55	2472.44	1840.89	1899.37	2527.24	2639.89	2498.66	2267.88	2434.58	2104.33	2090.91
ENSRNOG00000059492_LOC100365363	ENSRNOG00000059492	100365363	LOC100365363	1	60884761	60894948	-0.077549	0.66561	0.93258	D	N	N	54.8126	142.098	112.67	114.631	97.3405	82.1865	94.487	110.8	99.4873	83.534	101.658	87.4438
ENSRNOG00000052406_LOC102552527	ENSRNOG00000052406	102552527	LOC102552527	1	61268248	61276755	-0.4129	0.107571	0.610363	D	N	N	20.301	101.997	42.364	152.841	101.43	55.4759	39.5824	32.2802	66.3249	38.4696	54.2179	69.6455
ENSRNOG00000051578_Zfp54	ENSRNOG00000051578	308232	Zfp54	1	61314070	61326280	-0.400744	0.0666515	0.53857	D	N	N	26.3913	64.5109	43.2654	101.894	70.3469	69.8586	39.5824	45.3668	45.9995	41.767	41.5105	52.6211
ENSRNOG00000042347_Zfp53	ENSRNOG00000042347	NA	AABR07001896.1	1	61374379	61377590	-0.197033	0.340649	0.810048	D	N	N	34.5116	60.1521	46.8708	71.3259	44.1713	30.82	48.5204	28.7904	35.3019	41.767	48.2878	45.6565
ENSRNOG00000042826_Zfp52	ENSRNOG00000042826	361487	Zfp52	1	61382118	61426320	-0.472495	0.0480196	0.489981	D	N	N	34.5116	67.998	51.3776	111.234	107.156	55.4759	41.4977	23.5558	60.9761	40.6678	44.052	62.681
ENSRNOG00000058436_LOC108348215	ENSRNOG00000058436	108348215	LOC108348215	1	61445672	61509765	-0.0152149	0.951708	0.991339	D	N	N	4.06019	7.84592	6.30953	17.8315	19.6317	0	2.5537	2.61731	14.9766	4.39652	17.7902	13.9291
ENSRNOG00000043341_Zfp51	ENSRNOG00000043341	499056	Zfp51	1	61522298	61533178	-0.378128	0.0669507	0.53909	D	N	N	44.6621	103.741	56.7858	89.1573	90.7966	76.0226	61.2889	33.1526	57.7668	57.1548	55.065	72.7409
ENSRNOG00000058030_LOC682206	ENSRNOG00000058030	NA	AABR07001905.2	1	61733805	61740311	-0.208169	0.304804	0.794228	D	N	N	44.6621	75.8439	56.7858	84.0626	87.5246	59.5852	53.6278	39.2597	80.2317	46.1635	53.3707	75.0624
ENSRNOG00000057250_AABR07001905.1	ENSRNOG00000057250	NA	AABR07001905.1	1	61786900	61818159	-0.398378	0.123034	0.635438	D	N	N	10.1505	43.5885	15.3232	57.74	49.0792	26.7106	16.5991	14.8314	36.3717	17.5861	25.4146	20.1198
ENSRNOG00000051570_AABR07001910.1	ENSRNOG00000051570	NA	AABR07001910.1	1	61870347	61872975	-0.416528	0.108809	0.610756	D	N	N	12.1806	65.3827	37.8572	60.2873	61.349	16.4373	21.7065	12.2141	25.6741	24.1809	31.3447	43.335
ENSRNOG00000047884_AABR07001923.1	ENSRNOG00000047884	NA	AABR07001923.1	1	62112797	62114672	-0.543876	0.030609	0.412294	D	N	N	22.3311	60.1521	44.1667	70.4768	75.2548	26.7106	32.5597	13.959	27.8136	20.8835	24.5675	50.2995
ENSRNOG00000026569_LOC102555377	ENSRNOG00000026569	102555377	LOC102555377	1	62133816	62174310	-0.793958	2.32425e-05	0.00668874	D	Y	Y	58.8728	98.5099	69.4049	114.631	72.8008	94.5145	55.5431	35.7699	45.9995	39.5687	38.1219	51.8472
ENSRNOG00000061533_AABR07001926.3	ENSRNOG00000061533	NA	AABR07001926.3	1	62314276	62316450	-0.132605	0.614738	0.918914	D	N	N	4.06019	39.2296	19.83	27.1718	37.6274	14.3826	23.6218	8.72438	21.3951	19.7844	12.7073	37.1443
ENSRNOG00000011675_Zfp40	ENSRNOG00000011675	NA	Zfp40	1	62555188	62558033	-0.238395	0.334212	0.807045	D	N	N	12.1806	42.7167	24.3368	50.0979	54.8051	22.6013	24.8986	34.8975	33.1624	15.3878	27.1089	30.9536
ENSRNOG00000054954_Nilr1	ENSRNOG00000054954	65146	Lilrb2	1	63734135	63741982	0.0955204	0.717391	0.945853	U	N	N	6.09029	18.3072	14.4218	2.54735	8.99786	10.2733	16.5991	6.10706	10.6976	9.89218	20.3317	6.19071
ENSRNOG00000053260_Lilrb3a	ENSRNOG00000053260	683463	Lilrb3a	1	63759638	64013289	0.0449868	0.863787	0.977093	U	N	N	702.413	237.993	467.807	109.536	189.773	129.444	328.789	146.57	172.231	655.082	415.953	225.961
ENSRNOG00000058538_AABR07002001.1	ENSRNOG00000058538	690948	AABR07002001.1	1	63964155	63967366	0.112467	0.66086	0.931445	U	N	N	12.1806	6.97415	9.91498	2.54735	4.08994	2.05466	7.66111	1.74488	2.13951	14.2887	12.7073	6.96455
ENSRNOG00000058909_Rps9	ENSRNOG00000058909	81772	Rps9	1	64018125	64090021	-0.306868	0.16095	0.685241	D	N	N	18465.8	11652.1	17448.6	10713.3	6492.36	17070.1	9846.44	16432.4	8694.97	12122.3	7514.26	7632.37
ENSRNOG00000055179_Tsen34l1	ENSRNOG00000055179	292534	Tsen34l1	1	64024240	64030175	0.625869	0.00222337	0.121182	U	N	N	0	101.125	16.2245	0	3.27195	34.9293	149.392	187.574	229.997	204.438	190.61	87.4438
ENSRNOG00000052600_Mboat7l1	ENSRNOG00000052600	103689982	Mboat7l1	1	64031859	64046135	-0.110375	0.554904	0.903791	D	N	N	925.724	414.09	582.28	483.148	674.021	737.624	549.685	822.709	443.949	622.108	512.528	528.532
ENSRNOG00000059741_Tmc4	ENSRNOG00000059741	308310	Tmc4	1	64046377	64126611	-0.047462	0.785165	0.957435	D	N	N	992.717	1114.12	1032.06	1300	1389.76	1148.56	1513.07	876.8	1494.45	704.543	1062.33	1070.22
ENSRNOG00000058422_Lilrb3l	ENSRNOG00000058422	690955	Pirb	1	64074231	64081438	0.30302	0.220564	0.741025	U	N	N	10.1505	43.5885	69.4049	4.24559	34.3555	0	68.95	27.918	25.6741	109.913	53.3707	21.6675
ENSRNOG00000059572_Tsen34	ENSRNOG00000059572	292534	Tsen34	1	64092226	64099277	-0.4547	0.0198443	0.349498	D	N	N	1605.81	897.051	1203.32	1059.7	959.499	1736.19	1000.41	1303.42	685.713	737.517	641.296	739.016
ENSRNOG00000061893_Leng1	ENSRNOG00000061893	292535	Leng1	1	64126882	64131814	-0.00390323	0.986797	0.99829	D	N	N	46.6922	67.998	49.5749	137.557	139.876	104.788	73.419	144.825	73.8131	75.84	94.0341	85.1223
ENSRNOG00000053234_Cnot3	ENSRNOG00000053234	308311	Cnot3	1	64130908	64147251	0.261048	0.0550776	0.51229	U	N	N	296.394	408.86	300.154	466.166	471.979	347.238	448.813	434.474	451.437	528.682	471.018	465.077
ENSRNOG00000061039_Prpf31	ENSRNOG00000061039	292536	Prpf31	1	64150786	64162461	0.314669	0.0302317	0.411157	U	N	N	249.702	237.993	170.357	236.904	245.396	271.216	317.298	286.16	243.904	395.687	277.019	263.879
ENSRNOG00000056098_Tfpt	ENSRNOG00000056098	85423	Tfpt	1	64162672	64172470	-0.0963364	0.572945	0.908458	D	N	N	115.715	93.2793	97.3471	97.6485	101.43	143.826	88.1028	149.187	89.8595	92.327	92.3398	82.8008
ENSRNOG00000060293_Ndufa3	ENSRNOG00000060293	691001	Ndufa3	1	64172540	64175099	-0.0693883	0.729438	0.946342	D	N	N	320.755	209.225	265.902	252.188	233.944	462.299	247.709	431.857	226.788	295.666	211.789	222.866
ENSRNOG00000055716_Oscar	ENSRNOG00000055716	292537	Oscar	1	64182422	64188658	0.100835	0.694355	0.942315	U	N	N	24.3612	6.97415	8.11226	5.94382	5.72591	12.328	7.02269	7.85194	4.27902	20.8835	27.9561	3.8692
ENSRNOG00000056257_Cacng7	ENSRNOG00000056257	140728	Cacng7	1	64374603	64405149	-0.188124	0.416262	0.848135	D	N	N	4.06019	22.666	18.0272	4.24559	3.27195	4.10933	0.638426	18.3212	1.06976	2.19826	1.69431	10.8337
ENSRNOG00000054371_Prkcg	ENSRNOG00000054371	24681	Prkcg	1	64407114	64433636	-0.195596	0.445725	0.862269	D	N	N	0	9.58946	8.11226	35.6629	17.1777	14.3826	1.91528	13.959	7.48829	9.89218	17.7902	10.0599
ENSRNOG00000053450_Myadm	ENSRNOG00000053450	369016	Myadm	1	64438472	64446818	-0.301408	0.0867072	0.572833	D	N	N	2744.69	2190.76	2616.65	1525.86	1558.27	1943.71	2304.08	1213.56	1588.59	1462.94	1554.53	1769
ENSRNOG00000056036_LOC103691005	ENSRNOG00000056036	103691005	LOC103691005	1	64740487	64749705	-0.279476	0.220073	0.740983	D	N	N	22.3311	87.1769	63.9967	106.989	88.3426	59.5852	68.95	46.2392	52.418	43.9652	58.4536	65.7763
ENSRNOG00000027550_Mzf1	ENSRNOG00000027550	361508	Mzf1	1	65522118	65533212	-0.254716	0.334181	0.807045	D	N	N	4.06019	20.0507	18.0272	65.3821	32.7195	18.492	8.93796	31.4078	25.6741	9.89218	21.1789	16.2506
ENSRNOG00000027514_Ube2m	ENSRNOG00000027514	361509	Ube2m	1	65537640	65541177	-0.0406194	0.786273	0.95768	D	N	N	1051.59	586.701	736.413	661.463	669.931	877.341	690.138	866.331	653.621	874.908	688.736	656.216
ENSRNOG00000043328_Chmp2a	ENSRNOG00000043328	365191	Chmp2a	1	65541322	65543707	-0.183684	0.294644	0.787426	D	N	N	1130.76	886.589	979.78	1211.69	919.417	1649.89	940.401	1443.88	837.619	978.227	849.696	800.15
ENSRNOG00000027487_Trim28	ENSRNOG00000027487	116698	Trim28	1	65544373	65551043	0.150552	0.131239	0.648914	U	N	N	2478.75	2200.35	1855	2037.03	2125.95	2395.74	2250.45	2555.37	2280.72	2884.12	2303.41	2302.17
ENSRNOG00000027459_Zbtb45	ENSRNOG00000027459	308366	Zbtb45	1	65564173	65568300	0.12417	0.342757	0.810845	U	N	N	229.401	196.148	224.439	149.445	168.505	197.248	220.257	232.941	217.16	226.421	190.61	182.626
ENSRNOG00000060429_Zfp446	ENSRNOG00000060429	NA	AABR07002065.2	1	65590404	65612490	-0.166928	0.461521	0.866718	D	N	N	20.301	20.0507	15.3232	30.5682	26.9936	20.5466	17.2375	14.8314	27.8136	18.6852	23.7203	14.7029
ENSRNOG00000019623_Zfp446	ENSRNOG00000019623	NA	AABR07002065.1	1	65597103	65597899	0.127749	0.622572	0.921129	U	N	N	4.06019	13.0765	7.2109	13.5859	9.81584	6.16399	6.38426	7.85194	18.1858	10.9913	9.31869	13.9291
ENSRNOG00000027436_Zfp324	ENSRNOG00000027436	365192	Zfp324	1	65606520	65611815	0.0906424	0.658207	0.931445	U	N	N	26.3913	39.2296	27.0409	32.2665	39.2634	24.656	22.9833	41.877	36.3717	27.4783	39.8162	40.2396
ENSRNOG00000019453_Rps5	ENSRNOG00000019453	25538	Rps5	1	65660470	65664767	-0.265735	0.211334	0.734035	D	N	N	12905.3	8538.98	12283.8	7122.4	4557.82	10398.7	6852.86	10801.7	6387.51	9087.61	5662.38	5461.76
ENSRNOG00000031113_Zfp128	ENSRNOG00000031113	102553002	Zscan22	1	65677621	65681440	0.159255	0.340832	0.810082	U	N	N	75.1136	80.2028	72.109	52.6453	77.7088	67.8039	88.7412	54.0911	96.278	82.4348	85.5626	75.0624
ENSRNOG00000031459_Zfp128	ENSRNOG00000031459	NA	Zfp128	1	65691947	65701867	0.0854596	0.542657	0.901569	U	N	N	73.0835	91.5358	105.459	93.4029	74.4368	96.5692	84.9106	108.182	93.0687	101.12	83.8683	102.147
ENSRNOG00000031328_Zfp110	ENSRNOG00000031328	308362	Zfp110	1	65742089	65756528	0.126784	0.560779	0.904704	U	N	N	83.234	243.224	146.021	292.946	282.206	174.646	176.844	220.727	292.043	198.943	235.509	253.045
ENSRNOG00000045583_AABR07002068.1	ENSRNOG00000045583	NA	AABR07002068.1	1	65763521	65863037	-0.220776	0.400835	0.841837	D	N	N	2.0301	9.58946	2.70409	16.1332	16.3597	14.3826	4.46898	3.48975	7.48829	6.59479	9.31869	13.1553
ENSRNOG00000019376_Zfp329	ENSRNOG00000019376	308361	Zfp329	1	65781547	65800492	-0.417563	0.0216043	0.361994	D	N	N	125.866	231.891	165.851	238.602	233.944	139.717	149.392	116.034	128.371	124.202	117.754	182.626
ENSRNOG00000026861_Zscan18	ENSRNOG00000026861	499083	AABR07002071.1	1	65851060	65857872	0.244096	0.347895	0.814094	U	N	N	4.06019	20.9225	22.534	16.9824	21.2677	6.16399	12.7685	33.1526	31.0229	12.0904	19.4845	20.1198
ENSRNOG00000019127_Zfp606	ENSRNOG00000019127	292610	Zfp606	1	66231763	66254989	-0.189064	0.355439	0.818831	D	N	N	30.4514	51.4344	34.2518	69.6276	43.3533	41.0933	37.6671	41.0046	37.4414	39.5687	28.8032	49.5257
ENSRNOG00000060288_LOC100365062	ENSRNOG00000060288	108348260	LOC100909481	1	66643739	66645214	-0.36535	0.0233304	0.373833	D	N	N	1015.05	763.67	1038.37	850.816	602.038	770.499	653.748	789.556	477.111	769.392	541.331	564.903
ENSRNOG00000047230_Zfp551	ENSRNOG00000047230	682964	AABR07002134.1	1	66898946	66904539	0.225486	0.382967	0.834168	U	N	N	6.09029	9.58946	9.91498	11.8876	8.99786	4.10933	6.38426	11.3417	13.9068	13.1896	6.77723	17.7983
ENSRNOG00000019082_Sbk1	ENSRNOG00000019082	113907	LOC103690016	1	67368384	67390141	-0.0542436	0.778495	0.956465	D	N	N	93.3844	109.843	101.854	87.4591	16.3597	104.788	0	212.002	118.743	23.0817	0	52.6211
ENSRNOG00000046455_LOC100911224	ENSRNOG00000046455	100359821	Zik1	1	68262389	68269117	0.0730851	0.74695	0.947826	U	N	N	22.3311	32.2555	27.0409	22.0771	25.3576	14.3826	14.6838	20.9385	26.7439	27.4783	33.039	34.8228
ENSRNOG00000055229_LOC108348118	ENSRNOG00000055229	171105	LOC108348118	1	68436593	68488427	0.270977	0.235411	0.75024	U	N	N	107.595	113.33	94.643	94.2521	112.882	41.0933	164.714	54.9636	118.743	98.9218	117.754	172.566
ENSRNOG00000015271_Zfp418	ENSRNOG00000015271	292548	Zfp418	1	69615434	69629913	0.00753634	0.970597	0.995471	U	N	N	52.7825	167.38	100.051	166.427	135.786	98.6239	122.578	109.927	152.975	119.805	110.977	119.171
ENSRNOG00000015598_Zfp772	ENSRNOG00000015598	308318	Zfp772	1	69736684	69743616	0.047333	0.843489	0.972774	U	N	N	20.301	21.7942	19.83	22.0771	9.81584	22.6013	20.4296	28.7904	23.5346	13.1896	11.013	23.2152
ENSRNOG00000050407_NEWGENE_1305281	ENSRNOG00000050407	100134827	Mfsd14a	1	69788609	69820981	-0.597161	5.6842e-06	0.00241642	D	Y	Y	828.279	598.034	664.304	681.841	655.208	616.399	498.611	487.693	305.95	419.868	405.787	469.72
ENSRNOG00000046153_LOC108349745	ENSRNOG00000046153	NA	LOC108349745	1	69823107	69835185	0.572792	0.0239438	0.374895	U	N	N	8.12039	12.2048	8.11226	4.24559	9.81584	20.5466	12.1301	19.1936	16.0463	30.7757	15.2488	21.6675
ENSRNOG00000022742_Zfp954	ENSRNOG00000022742	308320	Zfp954	1	69853553	69859391	-0.118673	0.489853	0.879962	D	N	N	117.746	127.278	182.075	131.613	98.1584	178.756	104.063	136.1	160.463	136.292	114.366	109.111
ENSRNOG00000015825_Aurkc	ENSRNOG00000015825	NA	Aurkc	1	69958452	69963592	-0.193628	0.452282	0.863759	D	N	N	2.0301	18.3072	8.11226	64.5329	26.1756	20.5466	4.46898	24.4283	23.5346	7.69392	27.1089	13.9291
ENSRNOG00000015956_Usp29	ENSRNOG00000015956	361495	Usp29	1	69988673	70003582	-0.12876	0.469134	0.870791	D	N	N	73.0835	81.9463	64.8981	104.441	116.972	86.2959	70.2269	74.1572	101.627	60.4522	79.6325	93.6345
ENSRNOG00000014791_Peg3	ENSRNOG00000014791	103691034	Peg3	1	70222964	70237443	-0.32713	0.146587	0.668963	D	N	N	609.029	662.545	1006.82	461.071	1101.83	421.206	440.514	545.274	471.762	471.527	336.32	898.427
ENSRNOG00000042777_Zfp28	ENSRNOG00000042777	102548693	Zfp28	1	71167156	71173216	-0.278264	0.215506	0.736659	D	N	N	26.3913	52.3062	50.4763	84.9118	69.5289	55.4759	35.1134	49.729	64.1853	28.5774	36.4276	53.3949
ENSRNOG00000015322_Zfp78	ENSRNOG00000015322	NA	Zfp78	1	71183171	71190423	-0.0884756	0.73802	0.947157	D	N	N	4.06019	8.71769	9.91498	14.435	8.99786	8.21865	6.38426	2.61731	9.6278	3.29739	11.8602	15.4768
ENSRNOG00000034184_Zfp583	ENSRNOG00000034184	NA	Zfp583	1	71251258	71262421	-0.0127476	0.95973	0.993422	D	N	N	4.06019	12.2048	13.5204	6.79294	13.0878	16.4373	7.02269	9.59682	11.7673	12.0904	10.1658	15.4768
ENSRNOG00000033906_Zfp667	ENSRNOG00000033906	308326	Zfp667	1	71270107	71290337	-0.115042	0.564177	0.905491	D	N	N	32.4815	46.2038	32.449	45.0032	46.6253	55.4759	30.6444	40.1321	45.9995	32.9739	29.6504	54.9426
ENSRNOG00000015517_Zfp444	ENSRNOG00000015517	292569	Zfp444	1	71379559	71400388	0.129981	0.169689	0.696796	U	N	N	365.417	476.858	372.262	403.331	404.086	458.19	433.491	497.29	466.413	467.131	423.577	437.219
ENSRNOG00000015456_Zfp787	ENSRNOG00000015456	365176	Zfp787	1	71416110	71447195	-0.0199796	0.887978	0.982544	D	N	N	127.896	122.048	144.218	134.161	126.788	168.482	120.024	174.488	116.603	146.184	112.671	136.97
ENSRNOG00000015753_Epn1	ENSRNOG00000015753	117277	Epn1	1	72294153	72311856	0.122892	0.346183	0.812864	U	N	N	978.507	734.902	807.62	582.495	666.659	871.177	939.763	941.36	847.246	810.059	775.993	751.398
ENSRNOG00000015914_U2af2	ENSRNOG00000015914	308335	U2af2	1	72312727	72329856	0.133871	0.207986	0.732078	U	N	N	1352.04	1063.56	959.049	1073.28	1176.27	1136.23	1153	1130.68	1212.03	1506.91	1244.47	1190.94
ENSRNOG00000015997_Ccdc106	ENSRNOG00000015997	499071	Ccdc106	1	72331491	72335855	-0.0589286	0.80737	0.96324	D	N	N	71.0534	38.3578	26.1395	78.9679	58.8951	78.0772	29.3676	89.8611	63.1156	61.5513	39.8162	45.6565
ENSRNOG00000016274_Zfp580	ENSRNOG00000016274	308336	Zfp580	1	72338877	72339395	-0.119954	0.578477	0.910366	D	N	N	26.3913	25.2813	26.1395	31.4174	24.5396	26.7106	22.3449	40.1321	20.3254	16.487	23.7203	20.8937
ENSRNOG00000016279_Zfp865	ENSRNOG00000016279	308337	Zfp865	1	72356880	72361358	-0.0247883	0.888039	0.982544	D	N	N	54.8126	76.7157	59.4899	103.592	74.4368	61.6399	61.2889	88.1162	66.3249	64.8487	66.9252	81.2531
ENSRNOG00000028628_LOC100911196	ENSRNOG00000028628	100911196	LOC100911196	1	72363276	72366455	0.044357	0.772311	0.954172	U	N	N	119.776	183.072	127.092	169.824	174.231	123.28	150.03	133.483	191.486	128.598	170.278	164.828
ENSRNOG00000016565_Zfp524	ENSRNOG00000016565	365179	Zfp524	1	72376386	72377434	0.122625	0.375531	0.828632	U	N	N	115.715	115.074	115.374	112.933	107.974	123.28	118.747	164.018	134.789	126.4	113.519	98.2776
ENSRNOG00000016574_Fiz1	ENSRNOG00000016574	292584	Fiz1	1	72380711	72387301	0.0747333	0.505765	0.886787	U	N	N	221.281	251.07	219.031	237.753	228.218	236.286	250.901	303.608	246.044	208.835	215.177	246.855
ENSRNOG00000016608_Zfp579	ENSRNOG00000016608	308339	Zfp579	1	72399157	72402327	-0.0593052	0.821138	0.966496	D	N	N	40.6019	74.1004	38.7586	191.901	147.238	47.2573	35.7519	164.018	90.9292	48.3618	95.7284	69.6455
ENSRNOG00000038625_Sbk2	ENSRNOG00000038625	691411	Sbk2	1	72425707	72433488	0.010447	0.967996	0.995466	U	N	N	24.3612	0.871769	12.6191	10.1894	20.4497	8.21865	8.29954	13.959	21.3951	5.49565	8.47154	19.346
ENSRNOG00000016687_Ssc5d	ENSRNOG00000016687	308341	Ssc5d	1	72443758	72461547	-0.0144864	0.953091	0.991758	D	N	N	66.9932	119.432	149.626	88.3082	101.43	32.8746	139.815	57.5809	45.9995	120.904	102.506	88.2177
ENSRNOG00000042414_Nat14	ENSRNOG00000042414	361500	Nat14	1	72462405	72464492	0.175834	0.47409	0.872127	U	N	N	46.6922	35.7425	36.9558	32.2665	20.4497	20.5466	37.6671	80.2643	29.9532	30.7757	25.4146	25.5367
ENSRNOG00000038622_Zfp628	ENSRNOG00000038622	100359484	Zfp628	1	72465341	72468738	-0.0920293	0.507986	0.888315	D	N	N	150.227	149.944	144.218	118.027	151.328	145.881	121.939	169.253	110.185	156.077	117.754	126.136
ENSRNOG00000050348_LOC684270	ENSRNOG00000050348	684270	LOC684270	1	72491780	72509431	-0.0365111	0.836655	0.970987	D	N	N	142.107	122.048	124.388	99.3468	122.698	152.045	112.363	179.722	96.278	148.383	91.4926	107.564
ENSRNOG00000016829_Isoc2b	ENSRNOG00000016829	361501	Isoc2b	1	72524569	72545329	-0.163548	0.400879	0.841837	D	N	N	537.976	469.012	459.695	496.734	355.824	836.248	362.626	595.003	386.182	629.802	353.263	421.742
ENSRNOG00000016877_Shisa7	ENSRNOG00000016877	691429	Shisa7	1	72545596	72564513	-0.0931953	0.722722	0.945853	D	N	N	4.06019	30.5119	14.4218	12.7368	13.0878	26.7106	5.74583	19.1936	20.3254	6.59479	16.9431	21.6675
ENSRNOG00000016930_Ube2s	ENSRNOG00000016930	292588	Ube2s	1	72580424	72584482	-0.0400326	0.845379	0.973022	D	N	N	1108.43	670.391	650.783	845.721	747.64	1356.08	603.951	1416.84	702.829	918.873	729.4	817.948
ENSRNOG00000017127_Rpl28	ENSRNOG00000017127	64638	Rpl28	1	72619282	72621519	-0.311762	0.141637	0.663812	D	N	N	7172.33	5377.07	6990.96	5464.92	3402.83	8754.92	4347.68	7833.62	3929.21	5436.3	3520.77	3251.67
ENSRNOG00000017306_AABR07071876.1	ENSRNOG00000017306	NA	AABR07071876.1	1	72624705	72625239	0.205081	0.334146	0.807045	U	N	N	75.1136	36.6143	55.8844	39.9085	58.8951	84.2412	63.2042	104.693	58.8366	60.4522	72.8552	50.2995
ENSRNOG00000038616_Cox6b2	ENSRNOG00000038616	654441	Cox6b2	1	72661211	72662434	0.336312	0.1844	0.712412	U	N	N	36.5417	20.0507	9.91498	27.1718	5.72591	20.5466	14.0454	134.355	17.1161	9.89218	20.3317	23.2152
ENSRNOG00000017508_Kmt5c	ENSRNOG00000017508	308345	Kmt5c	1	72666665	72674271	-0.16991	0.51519	0.889601	D	N	N	75.1136	196.148	89.2348	475.506	314.107	205.466	67.0347	280.925	241.765	97.8227	237.203	177.209
ENSRNOG00000028273_Tmem150b	ENSRNOG00000028273	308346	Tmem150b	1	72692105	72701593	0.438329	0.0941022	0.5882	U	N	N	52.7825	30.5119	30.6463	28.0209	35.9914	12.328	35.1134	27.0456	19.2556	171.464	77.091	27.0844
ENSRNOG00000017673_Brsk1	ENSRNOG00000017673	499073	Brsk1	1	72701610	72727112	0.116324	0.63297	0.924463	U	N	N	40.6019	74.1004	48.6735	159.634	122.698	51.3666	83.6338	132.611	101.627	61.5513	95.7284	89.7653
ENSRNOG00000017795_Hspbp1	ENSRNOG00000017795	246146	Hspbp1	1	72732668	72756082	-0.0399108	0.80356	0.962299	D	N	N	503.464	343.477	391.191	315.023	354.188	511.611	386.248	479.841	326.275	482.518	343.945	314.952
ENSRNOG00000018090_Ppp6r1	ENSRNOG00000018090	361502	Ppp6r1	1	72756809	72784482	0.301271	0.0143876	0.294212	U	N	N	1599.72	1280.63	1283.54	1275.37	1474.83	1275.95	1739.07	1387.18	1540.45	2226.84	1768.01	1557.74
ENSRNOG00000038607_Tmem86b	ENSRNOG00000038607	690610	Tmem86b	1	72784966	72787367	-0.196648	0.452492	0.863759	D	N	N	6.09029	4.35885	5.40817	10.1894	4.90792	12.328	3.19213	2.61731	3.20927	4.39652	10.1658	7.73839
ENSRNOG00000018217_Syt5	ENSRNOG00000018217	54309	Syt5	1	72860218	72867930	0.171395	0.500916	0.884801	U	N	N	46.6922	37.4861	38.7586	37.3612	32.7195	22.6013	20.4296	107.31	40.6507	32.9739	24.5675	35.5966
ENSRNOG00000038600_Dnaaf3	ENSRNOG00000038600	100359753	Dnaaf3	1	72874404	72883002	-0.353645	0.15017	0.674987	D	N	N	10.1505	27.0248	49.5749	40.7576	25.3576	36.9839	15.9606	23.5558	31.0229	17.5861	31.3447	15.4768
ENSRNOG00000053828_Ppp1r12c	ENSRNOG00000053828	499076	Ppp1r12c	1	72903257	72926108	-0.0807772	0.416594	0.848135	D	N	N	468.952	442.859	421.837	521.358	458.891	472.573	361.349	492.055	443.949	424.265	472.712	435.671
ENSRNOG00000027942_Eps8l1	ENSRNOG00000027942	361503	Eps8l1	1	72927151	72941869	0.0297834	0.909325	0.985452	U	N	N	85.2641	192.661	82.0239	298.889	296.111	160.264	174.29	89.8611	402.228	53.8574	256.688	183.4
ENSRNOG00000027919_Rdh13	ENSRNOG00000027919	361504	Rdh13	1	72956026	72984350	-0.0889441	0.645214	0.927431	D	N	N	44.6621	76.7157	74.813	106.989	132.514	76.0226	75.3343	82.8816	85.5805	76.9392	77.091	85.8961
ENSRNOG00000018458_Ncr1	ENSRNOG00000018458	117547	Ncr1	1	73179013	73226777	0.0159049	0.949769	0.99127	U	N	N	6.09029	10.4612	6.30953	5.94382	13.9058	0	10.8532	0	5.34878	14.2887	6.77723	8.51223
ENSRNOG00000027811_Lilrb4	ENSRNOG00000027811	292594	Lilrb4	1	73393850	73399579	0.186233	0.475545	0.872758	U	N	N	58.8728	25.2813	13.5204	22.9262	38.4454	63.6946	26.8139	10.4693	20.3254	114.31	83.0211	36.3704
ENSRNOG00000046683_Lilrb3	ENSRNOG00000046683	308350	Lilrb3	1	73610149	73619356	-0.000492634	0.99843	0.999657	D	N	N	2.0301	12.2048	1.80272	11.0385	8.99786	14.3826	1.91528	0.872438	16.0463	7.69392	13.5545	10.8337
ENSRNOG00000027808_Lilra5	ENSRNOG00000027808	691533	Lilra5	1	73656028	73682247	-0.117546	0.594847	0.913279	D	N	N	32.4815	30.5119	57.6872	20.3788	31.9015	34.9293	33.8366	22.6834	32.0927	40.6678	31.3447	27.0844
ENSRNOG00000018616_Cdc42ep5	ENSRNOG00000018616	361505	Cdc42ep5	1	73719005	73719529	-0.468343	0.0493554	0.492151	D	N	N	93.3844	44.4602	63.0953	41.6068	26.9936	78.0772	33.1981	59.3258	24.6044	37.3705	30.4975	30.1797
ENSRNOG00000018621_Leng9	ENSRNOG00000018621	100912286	Leng9	1	73721114	73722631	0.109687	0.473312	0.872127	U	N	N	97.4446	103.741	76.6158	84.9118	96.5225	80.1319	109.809	107.31	89.8595	119.805	73.7024	87.4438
ENSRNOG00000018642_Leng8	ENSRNOG00000018642	361506	Leng8	1	73722088	73733788	-0.129899	0.618132	0.919357	D	N	N	426.32	1346.88	603.011	2550.75	1847.83	715.023	506.91	891.631	1680.59	469.329	1685.84	1162.31
ENSRNOG00000032699_Ttyh1	ENSRNOG00000032699	292597	Ttyh1	1	73734624	73753128	0.377737	NA	NA	U	NA	NA	12.1806	6.97415	16.2245	14.435	13.9058	6.16399	8.29954	133.483	10.6976	5.49565	7.62439	6.19071
ENSRNOG00000014186_RGD1310257	ENSRNOG00000014186	308381	Zswim9	1	75335894	75354820	0.0694304	0.725361	0.945853	U	N	N	38.5718	58.4085	32.449	61.9856	58.8951	49.3119	51.0741	68.9226	65.2551	46.1635	38.1219	51.8472
ENSRNOG00000014193_Lig1	ENSRNOG00000014193	81513	Lig1	1	75356220	75394758	0.0837168	0.66852	0.934007	U	N	N	665.872	537.01	348.827	543.435	454.801	842.412	399.016	680.501	522.041	825.447	543.873	656.989
ENSRNOG00000026764_Pla2g4c	ENSRNOG00000026764	691810	Pla2g4c	1	75428027	75620911	-0.126914	NA	NA	D	NA	NA	2.0301	0	0.901362	490.79	31.9015	0	0	0	0	1.09913	34.7333	2.32152
ENSRNOG00000013548_Selenow	ENSRNOG00000013548	NA	Selenow	1	77533148	77535681	-0.297814	0.19598	0.723208	D	N	N	138.047	81.0745	119.881	64.5329	67.0749	178.756	72.7806	130.866	83.4409	80.2366	51.6764	66.5502
ENSRNOG00000033146_LOC103690015	ENSRNOG00000033146	103690015	LOC103690015	1	77541359	77541814	-0.573411	0.0155922	0.306969	D	N	N	18.2709	20.0507	26.1395	24.6244	13.9058	30.82	10.8532	13.0866	7.48829	18.6852	16.0959	10.0599
ENSRNOG00000051483_LOC103689961	ENSRNOG00000051483	25545	LOC103689961	1	77803475	77808513	-0.265308	0.223431	0.741797	D	N	N	1173.4	516.959	795.001	585.891	429.443	973.911	505.633	926.529	638.644	574.845	427.813	454.244
ENSRNOG00000028449_LOC100360449	ENSRNOG00000028449	100364457	Rpl9	1	77829711	77830399	-0.262636	0.215849	0.736882	D	N	N	16959.4	11548.3	19706.5	9968.64	7029.78	16542.1	9656.83	16458.5	9465.2	12393.8	8579.13	8473.54
ENSRNOG00000013023_Gltscr2	ENSRNOG00000013023	292624	Nop53	1	77836196	77844189	0.0845468	0.634369	0.924836	U	N	N	1163.25	1466.32	1533.22	1367.93	975.041	1545.11	1317.71	2339.01	1207.75	1377.21	1091.13	1279.16
ENSRNOG00000011346_Ehd2	ENSRNOG00000011346	361512	Ehd2	1	77847600	77865870	-0.024064	0.906822	0.98495	D	N	N	911.513	802.9	1078.93	495.036	584.043	643.11	1007.44	721.506	856.874	379.2	672.64	783.125
ENSRNOG00000011262_Gltscr1	ENSRNOG00000011262	292622	Bicra	1	77869020	77893509	0.0401822	0.773367	0.954314	U	N	N	255.792	367.015	301.956	389.745	338.647	314.364	281.546	425.75	360.508	279.179	369.359	321.143
ENSRNOG00000001494_Napa	ENSRNOG00000001494	140673	Napa	1	77994203	78012845	0.000452773	0.9967	0.999339	U	N	N	797.828	925.819	832.858	902.612	829.439	1006.79	847.191	1087.93	839.758	969.433	763.286	788.542
ENSRNOG00000001493_Kptn	ENSRNOG00000001493	NA	Kptn	1	78015722	78023676	0.0788195	0.564426	0.905491	U	N	N	198.949	159.534	191.089	150.294	175.867	219.849	178.759	252.135	183.998	186.852	171.972	177.983
ENSRNOG00000021390_Meis3	ENSRNOG00000021390	361514	Meis3	1	78068931	78079862	-0.0773036	0.718558	0.945853	D	N	N	56.8427	74.9722	79.3198	90.0065	103.884	59.5852	77.2495	113.417	81.3014	53.8574	74.5496	38.692
ENSRNOG00000047575_Dhx34	ENSRNOG00000047575	684903	Dhx34	1	78090044	78112488	0.20907	0.0845007	0.570411	U	N	N	109.625	130.765	115.374	123.122	107.156	117.116	117.47	122.141	152.975	148.383	144.863	140.065
ENSRNOG00000060587_AABR07002627.1	ENSRNOG00000060587	NA	AABR07002627.1	1	78112559	78149053	-0.134911	0.607729	0.917522	D	N	N	684.143	158.662	195.596	116.329	408.994	121.225	556.069	121.269	115.534	113.21	120.296	359.835
ENSRNOG00000049028_C5ar2	ENSRNOG00000049028	445269	C5ar2	1	78166810	78180216	0.278731	0.267156	0.77118	U	N	N	60.9029	42.7167	118.078	36.5121	34.3555	71.9132	110.448	34.0251	116.603	52.7583	76.2439	99.0514
ENSRNOG00000047800_C5ar1	ENSRNOG00000047800	113959	C5ar1	1	78186776	78195328	-0.130358	0.61958	0.91971	D	N	N	440.531	122.048	271.31	45.0032	88.3426	164.373	196.635	78.5194	89.8595	284.675	212.636	85.1223
ENSRNOG00000049661_Inafm1	ENSRNOG00000049661	100192314	Inafm1	1	78210867	78212350	-0.138676	0.582103	0.910405	D	N	N	36.5417	43.5885	39.6599	90.8556	85.0706	73.9679	20.4296	102.948	52.418	37.3705	61.8422	44.8827
ENSRNOG00000048848_Ccdc9	ENSRNOG00000048848	NA	Ccdc9	1	78213223	78224319	-0.186516	0.392302	0.837676	D	N	N	123.836	244.095	153.232	366.819	305.109	189.029	130.239	206.768	258.881	158.275	217.719	205.841
ENSRNOG00000015128_Sae1	ENSRNOG00000015128	308384	Sae1	1	78277515	78333321	-0.0541033	0.75005	0.948406	D	N	N	1534.75	728.799	957.246	1260.09	963.589	1047.88	1359.85	1039.95	894.316	1140.9	899.678	878.307
ENSRNOG00000015229_Zc3h4	ENSRNOG00000015229	678741	Zc3h4	1	78354934	78390907	-0.0100827	0.933217	0.989544	D	N	N	714.594	868.282	672.416	1035.07	981.584	840.357	750.15	864.586	896.455	917.774	802.255	855.092
ENSRNOG00000015304_Tmem160	ENSRNOG00000015304	292654	Tmem160	1	78417719	78420427	-0.183273	0.435619	0.859213	D	N	N	353.237	151.688	254.184	170.673	146.42	322.582	194.72	361.189	115.534	203.339	152.488	140.065
ENSRNOG00000015852_Arhgap35	ENSRNOG00000015852	306400	Arhgap35	1	78456409	78573374	0.350302	0.000707079	0.059848	U	Y	N	952.115	947.613	881.532	796.472	1126.37	850.631	1266	1125.44	1265.52	1148.59	1047.93	1304.69
ENSRNOG00000015865_Ap2s1	ENSRNOG00000015865	65046	Ap2s1	1	78671121	78682871	-0.14709	0.463573	0.868197	D	N	N	1498.21	685.211	918.488	806.662	772.18	1263.62	971.046	1229.26	591.575	1000.21	773.452	676.335
ENSRNOG00000015948_Slc1a5	ENSRNOG00000015948	292657	Slc1a5	1	78710539	78724794	0.109563	0.634402	0.924836	U	N	N	950.085	600.649	685.936	434.748	394.27	217.794	653.748	444.071	452.507	861.719	566.746	657.763
ENSRNOG00000016055_Fkrp	ENSRNOG00000016055	308390	Fkrp	1	78733508	78739107	0.0173806	0.862089	0.976509	U	N	N	253.762	231.891	281.225	280.209	266.664	299.981	260.478	291.394	304.88	271.485	261.771	242.985
ENSRNOG00000016145_Strn4	ENSRNOG00000016145	308392	Strn4	1	78735678	78765692	0.00930023	0.947707	0.99127	U	N	N	749.106	670.391	617.433	1026.58	835.983	756.116	633.319	729.358	972.408	752.905	854.778	750.624
ENSRNOG00000016434_Prkd2	ENSRNOG00000016434	292658	Prkd2	1	78767911	78796231	0.00388593	0.973229	0.995958	U	N	N	274.063	313.837	317.279	367.668	349.28	258.888	335.812	320.185	282.415	360.515	326.154	277.034
ENSRNOG00000052256_Dact3	ENSRNOG00000052256	499088	Dact3	1	78800754	78812483	-0.0370367	0.872574	0.978085	D	N	N	200.98	199.635	245.17	117.178	121.062	318.473	129.6	281.797	195.765	181.357	105.894	262.331
ENSRNOG00000016701_Gng8	ENSRNOG00000016701	245986	Gng8	1	78818404	78822224	0.105914	0.663836	0.932102	U	N	N	50.7524	36.6143	50.4763	29.7191	12.2698	34.9293	39.5824	55.836	47.0692	26.3791	23.7203	43.335
ENSRNOG00000016756_Ptgir	ENSRNOG00000016756	292661	Ptgir	1	78833157	78837623	-0.0161343	0.944052	0.990449	D	N	N	111.655	147.329	172.16	75.5715	114.518	43.1479	140.454	81.1367	78.0922	119.805	141.475	97.5037
ENSRNOG00000016770_Calm2	ENSRNOG00000016770	24244	Calm3	1	78843080	78851719	0.00827962	0.958415	0.993061	U	N	N	1260.69	681.724	869.814	554.474	868.702	865.013	849.745	923.912	817.293	874.908	811.574	842.711
ENSRNOG00000027936_Ccdc8	ENSRNOG00000027936	494320	Ccdc8	1	78933372	78936700	0.24272	0.200793	0.726098	U	N	N	215.19	217.071	213.623	326.91	283.024	258.888	423.915	442.326	259.951	259.395	207.553	255.367
ENSRNOG00000016907_Ppp5c	ENSRNOG00000016907	65179	Ppp5c	1	78944040	78968329	0.0428711	0.780388	0.956881	U	N	N	531.885	458.551	429.048	669.954	667.477	741.734	499.249	681.374	563.761	722.129	607.409	538.592
ENSRNOG00000017699_Mill1	ENSRNOG00000017699	292671	Mill1	1	79631668	79657941	-0.25232	0.338477	0.809354	D	N	N	8.12039	72.3569	21.6327	33.1156	17.1777	16.4373	12.1301	36.6424	25.6741	16.487	21.1789	10.8337
ENSRNOG00000057645_Micb	ENSRNOG00000057645	365212	Micb	1	79754587	79772092	-0.186094	0.481213	0.874038	D	N	N	2.0301	11.333	6.30953	18.6806	22.0856	8.21865	6.38426	5.23463	16.0463	3.29739	10.1658	13.1553
ENSRNOG00000013767_Ccdc61	ENSRNOG00000013767	292680	Ccdc61	1	79795375	79816450	0.11759	0.623597	0.921435	U	N	N	30.4514	75.8439	32.449	119.726	67.8929	71.9132	44.0514	91.606	73.8131	74.7409	94.8813	71.967
ENSRNOG00000013847_Nova2	ENSRNOG00000013847	292681	Nova2	1	79831534	79865807	0.252815	0.340175	0.80959	U	N	N	4.06019	12.2048	9.01362	13.5859	4.08994	2.05466	15.3222	19.1936	14.9766	4.39652	5.08292	9.28607
ENSRNOG00000014132_Mypop	ENSRNOG00000014132	499090	Mypop	1	79898551	79911513	-0.140714	0.474402	0.872202	D	N	N	38.5718	38.3578	39.6599	54.3435	61.349	49.3119	41.4977	62.8155	39.581	34.0731	39.8162	34.0489
ENSRNOG00000014252_Irf2bp1	ENSRNOG00000014252	308404	Irf2bp1	1	79911516	79914217	0.00425007	0.975432	0.996067	U	N	N	540.006	459.422	441.667	500.13	464.617	577.36	416.892	682.246	531.669	499.005	415.953	440.314
ENSRNOG00000014353_Sympk	ENSRNOG00000014353	292683	Sympk	1	79931156	79959461	0.296427	0.0162535	0.315191	U	N	N	641.51	604.136	480.426	665.708	696.925	727.351	636.511	849.754	772.364	925.468	770.91	786.994
ENSRNOG00000014984_Dmwd	ENSRNOG00000014984	680252	Dmwd	1	79981355	79987562	0.271409	0.0477126	0.488986	U	N	N	186.769	150.816	173.061	112.084	143.148	162.318	177.482	202.406	223.579	174.762	177.055	172.566
ENSRNOG00000015085_Dmpk	ENSRNOG00000015085	308405	Dmpk	1	79989019	79999364	-0.0679426	0.792967	0.959406	D	N	N	263.913	136.868	142.415	510.32	410.629	125.334	252.817	205.895	528.459	113.21	214.33	155.542
ENSRNOG00000060146_Six5	ENSRNOG00000060146	308406	Six5	1	80000165	80003232	0.127221	0.435724	0.859213	U	N	N	127.896	128.15	103.657	162.181	151.328	164.373	107.256	171.87	163.673	140.689	147.405	192.686
ENSRNOG00000008815_Fbxo46	ENSRNOG00000008815	292686	Fbxo46	1	80028928	80045341	-0.0328194	0.788484	0.958397	D	N	N	215.19	187.43	194.694	185.108	213.495	209.576	238.771	223.344	170.091	175.861	171.972	188.043
ENSRNOG00000015413_Qpctl	ENSRNOG00000015413	292687	Qpctl	1	80047504	80056574	0.0985803	0.457571	0.866104	U	N	N	180.679	229.275	190.187	235.206	185.683	246.56	224.087	294.012	201.114	201.141	226.19	215.127
ENSRNOG00000015844_Snrpd2	ENSRNOG00000015844	680309	Snrpd2	1	80056755	80059996	-0.316572	0.13321	0.652401	D	N	N	2066.64	1269.3	1626.96	1671.91	1038.84	2475.87	1105.12	2125.26	961.71	1520.1	997.947	995.931
ENSRNOG00000030127_Eml2	ENSRNOG00000030127	192360	Eml2	1	80087684	80119012	0.110878	0.523438	0.894021	U	N	N	351.207	482.96	413.725	500.979	782.814	521.885	656.94	658.69	588.366	474.825	498.974	461.982
ENSRNOG00000016362_Gpr4	ENSRNOG00000016362	308408	Gpr4	1	80135391	80136880	-0.129445	0.557289	0.904345	D	N	N	79.1738	40.1014	79.3198	51.7962	33.5375	53.4213	47.8819	79.3918	43.86	40.6678	43.2049	41.7873
ENSRNOG00000025890_Opa3	ENSRNOG00000025890	308409	Opa3	1	80141630	80160145	0.299562	0.0672317	0.539182	U	N	N	105.565	102.869	89.2348	63.6838	121.062	80.1319	120.024	89.8611	121.952	128.598	126.226	124.588
ENSRNOG00000016367_Vasp	ENSRNOG00000016367	361517	Vasp	1	80170619	80185882	0.133365	0.388097	0.836228	U	N	N	1329.71	923.204	1046.48	1042.72	1255.61	1265.67	1286.43	1080.08	1063.34	1835.55	1319.87	1010.63
ENSRNOG00000059266_AABR07002674.1	ENSRNOG00000059266	NA	AABR07002674.1	1	80190219	80191618	-0.15492	0.478156	0.873379	D	N	N	73.0835	66.2545	71.2076	82.3644	41.7173	78.0772	58.7352	70.6675	32.0927	96.7235	57.6065	42.5611
ENSRNOG00000016603_Rtn2	ENSRNOG00000016603	308410	Rtn2	1	80195532	80208448	0.194902	0.456196	0.865946	U	N	N	95.4145	30.5119	40.5613	37.3612	25.3576	47.2573	39.5824	55.836	194.696	29.6765	21.1789	24.7628
ENSRNOG00000046667_Fosb	ENSRNOG00000046667	100360880	Fosb	1	80214494	80221710	0.117567	0.641291	0.926838	U	N	N	28.4214	24.4095	14.4218	11.8876	15.5418	12.328	22.9833	15.7039	35.3019	10.9913	24.5675	10.8337
ENSRNOG00000017839_Ercc1	ENSRNOG00000017839	292673	Ercc1	1	80256973	80268198	-0.135148	0.4156	0.847755	D	N	N	162.408	136.868	146.922	162.181	125.97	205.466	136.623	185.829	116.603	167.068	130.462	102.921
ENSRNOG00000016825_Cd3eap	ENSRNOG00000016825	680493	Cd3eap	1	80267725	80271001	0.062332	0.698743	0.942385	U	N	N	133.986	155.175	143.317	214.827	145.602	240.396	190.889	197.171	173.3	184.654	194.845	139.291
ENSRNOG00000025350_Ppp1r13l	ENSRNOG00000025350	686781	Ppp1r13l	1	80279706	80290408	0.0510414	0.773332	0.954314	U	N	N	243.612	306.863	233.453	382.103	327.195	240.396	326.874	207.64	395.81	251.701	373.595	256.915
ENSRNOG00000017753_Ercc2	ENSRNOG00000017753	308415	Ercc2	1	80293566	80307344	-0.00177434	0.992149	0.99829	D	N	N	140.077	186.559	141.514	272.567	232.308	250.669	152.584	194.554	255.672	205.537	225.343	191.912
ENSRNOG00000018101_Klc3	ENSRNOG00000018101	171549	Klc3	1	80306102	80315533	0.10581	0.592936	0.912929	U	N	N	140.077	185.687	190.187	268.321	256.848	191.084	231.749	335.016	271.718	141.788	198.234	173.34
ENSRNOG00000016837_Ckm	ENSRNOG00000016837	24265	Ckm	1	80321585	80331841	0.0850479	NA	NA	U	NA	NA	1179.49	6.97415	0.901362	0	1.63597	211.63	0	3.48975	7459.41	9.89218	0	1.54768
ENSRNOG00000017069_Mark4	ENSRNOG00000017069	680407	Mark4	1	80335526	80367328	0.246891	0.0381956	0.452553	U	N	N	280.153	308.606	262.296	295.493	286.295	312.309	300.06	459.775	340.182	337.433	322.766	330.429
ENSRNOG00000060041_AABR07002677.2	ENSRNOG00000060041	NA	AABR07002677.2	1	80372505	80382703	-0.0167118	0.94827	0.99127	D	N	N	32.4815	8.71769	26.1395	14.435	8.17987	18.492	14.6838	20.0661	16.0463	7.69392	16.0959	27.8582
ENSRNOG00000017448_Exoc3l2	ENSRNOG00000017448	686809	Exoc3l2	1	80383050	80404290	-0.0583203	0.783623	0.957169	D	N	N	166.468	103.741	202.806	96.7994	96.5225	162.318	125.131	184.084	126.231	106.616	80.4796	160.185
ENSRNOG00000017463_Bloc1s3	ENSRNOG00000017463	680476	Bloc1s3	1	80415686	80416273	0.074708	0.686697	0.940229	U	N	N	58.8728	43.5885	61.2926	56.8909	59.7131	82.1865	58.7352	87.2438	47.0692	71.4435	65.2309	50.2995
ENSRNOG00000017468_Trappc6a	ENSRNOG00000017468	680465	Trappc6a	1	80417310	80424445	-0.163274	0.391144	0.837429	D	N	N	503.464	392.296	462.399	489.941	417.173	649.274	420.723	724.123	356.229	401.183	339.709	301.797
ENSRNOG00000043378_Nkpd1	ENSRNOG00000043378	680440	Nkpd1	1	80426918	80432875	-0.0511337	0.842521	0.972743	D	N	N	20.301	22.666	15.3232	41.6068	65.439	69.8586	45.3282	57.5809	33.1624	17.5861	33.8862	32.5012
ENSRNOG00000017692_Ppp1r37	ENSRNOG00000017692	308398	Ppp1r37	1	80439718	80471527	0.249511	0.153811	0.682122	U	N	N	276.093	425.423	310.068	483.148	588.133	507.502	485.204	520.845	633.295	406.678	533.707	582.701
ENSRNOG00000049772_Gemin7	ENSRNOG00000049772	499391	Gemin7	1	80473966	80483487	-0.227753	0.251691	0.759719	D	N	N	152.257	101.997	148.725	179.164	124.334	252.724	143.007	178.85	111.255	145.085	97.4227	110.659
ENSRNOG00000049605_Zfp296	ENSRNOG00000049605	365511	Zfp296	1	80487938	80491039	-0.0424421	0.862837	0.976895	D	N	N	22.3311	20.0507	14.4218	39.9085	44.9893	55.4759	47.2435	31.4078	23.5346	32.9739	27.1089	23.989
ENSRNOG00000046000_Clasrp	ENSRNOG00000046000	499390	Clasrp	1	80491480	80515694	-0.0240196	0.923226	0.988765	D	N	N	83.234	180.456	81.1226	371.064	266.664	160.264	114.917	216.365	237.486	119.805	223.649	206.615
ENSRNOG00000033235_Relb	ENSRNOG00000033235	100360982	Relb	1	80517411	80544825	0.079246	0.69585	0.942315	U	N	N	209.1	180.456	163.147	160.483	165.233	123.28	146.2	168.38	119.813	312.153	199.928	126.91
ENSRNOG00000018255_Clptm1	ENSRNOG00000018255	292696	Clptm1	1	80549043	80580662	0.0807979	0.577565	0.910351	U	N	N	1839.27	1273.65	1583.69	989.222	1415.12	1413.61	1673.31	1763.2	1306.17	1614.62	1365.61	1317.07
ENSRNOG00000018405_Apoc4	ENSRNOG00000018405	680551	Apoc4	1	80595326	80599572	0.141806	0.580034	0.910405	U	N	N	22.3311	10.4612	12.6191	14.435	7.36188	32.8746	8.93796	42.7494	10.6976	50.56	5.93008	6.19071
ENSRNOG00000018426_Apoc1	ENSRNOG00000018426	25292	NEWGENE_2134	1	80606638	80609921	0.180154	0.472219	0.871624	U	N	N	79.1738	47.0755	73.9117	105.291	35.1734	57.5306	132.793	98.5855	80.2317	85.7322	60.1479	23.989
ENSRNOG00000018454_Apoe	ENSRNOG00000018454	25728	Apoe	1	80612895	80617057	0.191172	0.433591	0.857159	U	N	N	24911.3	37737.1	39718.5	38155.9	25158.8	48938	32285.2	107051	33666.3	36077.9	24560.7	26705.2
ENSRNOG00000018556_Tomm40	ENSRNOG00000018556	308416	Tomm40	1	80618154	80630038	0.161598	0.280187	0.776593	U	N	N	332.936	298.145	239.762	276.812	306.745	388.331	303.891	390.852	285.625	457.238	343.097	294.059
ENSRNOG00000018730_Nectin2	ENSRNOG00000018730	308417	Nectin2	1	80631450	80666585	0.2063	0.233584	0.749187	U	N	N	598.878	954.587	656.191	804.963	760.728	678.039	1340.69	845.392	888.967	614.414	712.457	844.258
ENSRNOG00000029399_Bcam	ENSRNOG00000029399	78958	Bcam	1	80674444	80689171	-0.0667008	0.757737	0.950822	D	N	N	1153.09	1876.05	937.416	2222.99	1583.62	1658.11	865.706	2586.78	1488.03	1353.03	1283.44	1317.85
ENSRNOG00000018953_Cblc	ENSRNOG00000018953	292699	Cblc	1	80699323	80716146	0.0316401	0.892198	0.983317	U	N	N	123.836	213.583	141.514	224.167	224.128	336.965	231.11	324.547	288.834	92.327	155.029	208.937
ENSRNOG00000043416_Bcl3	ENSRNOG00000043416	680611	Bcl3	1	80730499	80744831	0.162997	0.472562	0.871868	U	N	N	215.19	243.224	167.653	252.188	238.034	98.6239	160.883	183.212	170.091	384.696	343.097	175.661
ENSRNOG00000043088_Ceacam19	ENSRNOG00000043088	680640	Ceacam19	1	80800951	80809769	0.0340287	0.897092	0.983317	U	N	N	2.0301	17.4354	2.70409	5.09471	5.72591	2.05466	5.74583	8.72438	7.48829	5.49565	4.23577	7.73839
ENSRNOG00000019202_PVR	ENSRNOG00000019202	25066	PVR	1	80820050	80835701	0.00242811	0.990876	0.99829	U	N	N	148.197	144.714	111.769	253.886	224.946	160.264	135.985	119.524	209.672	128.598	260.923	194.234
ENSRNOG00000029336_Zfp180	ENSRNOG00000029336	246279	Zfp180	1	80920747	80940040	0.236144	0.105539	0.60866	U	N	N	237.521	401.886	283.028	332.854	439.259	299.981	340.919	404.811	425.763	380.299	420.188	427.933
ENSRNOG00000029022_Zfp112	ENSRNOG00000029022	308420	Zfp112	1	80953275	80958908	-0.182811	0.487674	0.87824	D	N	N	32.4815	33.999	24.3368	111.234	192.227	26.7106	47.8819	90.7335	47.0692	61.5513	44.052	39.4658
ENSRNOG00000032625_AC118165.1	ENSRNOG00000032625	NA	AC118165.1	1	80973739	81100069	0.0511033	0.816278	0.965493	U	N	N	30.4514	46.2038	31.5477	82.3644	46.6253	61.6399	42.7745	64.5604	57.7668	35.1722	55.9122	58.0379
ENSRNOG00000054609_AABR07002683.1	ENSRNOG00000054609	NA	AABR07002683.1	1	80982358	80984217	-0.573036	0.00108202	0.0794348	D	Y	N	111.655	87.1769	119.881	93.4029	67.0749	125.334	75.9727	68.0501	56.6971	67.047	48.2878	61.9071
ENSRNOG00000024376_Zfp111	ENSRNOG00000024376	170849	Zfp111	1	81035972	81043340	0.0171247	0.942408	0.990449	U	N	N	50.7524	85.4334	72.109	154.539	162.779	102.733	74.0574	150.059	147.626	72.5426	74.5496	124.588
ENSRNOG00000019416_Zfp94	ENSRNOG00000019416	499094	Zfp61	1	81122790	81152384	-0.134115	0.58332	0.910421	D	N	N	121.806	263.274	143.317	541.737	305.927	295.872	127.685	328.037	311.299	181.357	271.089	243.759
ENSRNOG00000055608_LOC102548695	ENSRNOG00000055608	102548695	LOC102548695	1	81159107	81163689	-0.0672474	0.799079	0.961452	D	N	N	4.06019	13.0765	8.11226	13.5859	13.0878	4.10933	5.74583	16.5763	7.48829	8.79305	4.23577	11.6076
ENSRNOG00000019440_Kcnn4	ENSRNOG00000019440	65206	Kcnn4	1	81230612	81245996	0.0774991	0.767223	0.953155	U	N	N	237.521	198.763	323.589	470.411	138.24	1152.67	284.1	212.875	503.855	606.72	405.787	763.779
ENSRNOG00000019596_Smg9	ENSRNOG00000019596	365215	Smg9	1	81260548	81282887	0.0478412	0.769716	0.953598	U	N	N	188.799	145.585	131.599	193.599	165.233	217.794	133.431	225.961	160.463	218.727	174.514	163.28
ENSRNOG00000037931_Plaur	ENSRNOG00000037931	50692	Plaur	1	81328183	81344708	-0.0171856	0.940561	0.990358	D	N	N	77.1437	26.1531	35.1531	39.9085	37.6274	43.1479	34.475	34.0251	41.7205	54.9565	60.1479	24.7628
ENSRNOG00000024243_Cadm4	ENSRNOG00000024243	365216	Cadm4	1	81365138	81370109	-0.298827	0.250551	0.758461	D	N	N	77.1437	53.1779	64.8981	108.687	199.589	26.7106	31.9213	81.1367	28.8834	93.4261	71.1609	66.5502
ENSRNOG00000019802_Zfp428	ENSRNOG00000019802	361519	Zfp428	1	81372650	81382079	-0.041049	0.852838	0.974102	D	N	N	46.6922	31.3837	39.6599	47.5506	39.2634	65.7492	32.5597	69.795	40.6507	48.3618	24.5675	41.0135
ENSRNOG00000046500_Irgq	ENSRNOG00000046500	292708	Irgq	1	81395841	81399672	0.651379	0.0019228	0.11007	U	N	N	32.4815	33.1272	36.9558	25.4735	28.6295	34.9293	65.7579	41.0046	74.8829	29.6765	60.9951	61.1333
ENSRNOG00000019862_Pinlyp	ENSRNOG00000019862	308429	Pinlyp	1	81406576	81412251	-0.113836	0.644189	0.927017	D	N	N	14.2107	14.8201	8.11226	24.6244	6.5439	108.897	11.4917	55.836	3.20927	18.6852	15.2488	32.5012
ENSRNOG00000019915_Xrcc1	ENSRNOG00000019915	84495	Xrcc1	1	81413353	81441678	-0.0225107	0.914689	0.986447	D	N	N	286.244	377.476	247.875	523.056	408.176	710.914	296.23	530.442	452.507	336.334	393.927	491.388
ENSRNOG00000024065_Zfp575	ENSRNOG00000024065	308430	Zfp575	1	81447987	81450094	-0.129972	0.620126	0.91971	D	N	N	32.4815	13.9483	17.1259	24.6244	22.0856	32.8746	8.93796	45.3668	2.13951	20.8835	19.4845	20.8937
ENSRNOG00000019982_Ethe1	ENSRNOG00000019982	292710	Ethe1	1	81456984	81472097	-0.0793126	0.666111	0.93258	D	N	N	310.605	122.048	210.017	179.164	170.959	209.576	162.799	229.451	156.184	215.43	173.667	181.078
ENSRNOG00000055259_Phldb3	ENSRNOG00000055259	308431	Phldb3	1	81474553	81492631	0.0964555	0.588504	0.911336	U	N	N	79.1738	135.124	68.5035	128.217	112.882	113.006	118.109	107.31	141.208	85.7322	124.532	114.528
ENSRNOG00000019999_Lypd3	ENSRNOG00000019999	60378	Lypd3	1	81499821	81504318	0.209767	0.404282	0.844424	U	N	N	639.48	451.577	261.395	491.639	1146	310.254	1110.22	838.413	742.41	347.325	752.273	343.585
ENSRNOG00000049821_LOC100909620	ENSRNOG00000049821	100909620	LOC100909620	1	81555412	81559685	0.147457	0.446975	0.862269	U	N	N	4.06019	3.48708	23.4354	52.6453	10.6338	0	0	52.3463	23.5346	0	48.2878	52.6211
ENSRNOG00000050105_LOC103689942	ENSRNOG00000050105	287009	Ceacam4	1	81643816	81650094	-0.362747	NA	NA	D	NA	NA	4.06019	6.97415	16.2245	9.34029	0	326.692	0	6.9795	2.13951	3.29739	10.1658	24.7628
ENSRNOG00000037897_NEWGENE_68440	ENSRNOG00000037897	29287	Rps19	1	81750928	81756627	-0.286184	0.20754	0.732078	D	N	N	8416.78	6828.57	10779.4	7991.05	4054.76	13429.3	5609.21	11207.3	6166.07	7568.62	4720.34	4288.62
ENSRNOG00000020125_Cd79a	ENSRNOG00000020125	100913063	AABR07002700.1	1	81763614	81767980	0.150324	0.558728	0.904483	U	N	N	12.1806	12.2048	10.8163	2.54735	8.17987	6.16399	10.2148	5.23463	6.41853	27.4783	16.9431	1.54768
ENSRNOG00000020130_Arhgef1	ENSRNOG00000020130	60323	Arhgef1	1	81779380	81797236	0.0985793	0.552036	0.903791	U	N	N	1106.4	1274.53	1152.84	1868.91	1605.71	1206.09	1362.4	1053.03	1536.17	1466.24	2028.09	1433.92
ENSRNOG00000020233_Rabac1	ENSRNOG00000020233	83583	Rabac1	1	81843649	81846804	-0.262391	0.0949108	0.589109	D	N	N	1106.4	1235.3	1586.4	1146.31	778.724	1282.11	1072.56	1228.39	946.734	888.098	837.835	855.866
ENSRNOG00000020263_Atp1a3	ENSRNOG00000020263	24213	Atp1a3	1	81852429	81881549	0.0224999	0.931157	0.989397	U	N	N	156.317	36.6143	88.3335	47.5506	58.8951	22.6013	65.1194	14.8314	13.9068	147.284	129.615	53.3949
ENSRNOG00000020310_Grik5	ENSRNOG00000020310	24407	Grik5	1	81885521	81946714	0.070396	0.782367	0.957169	U	N	N	89.3242	385.322	116.276	385.499	170.959	100.679	121.939	246.9	323.066	260.494	238.897	164.828
ENSRNOG00000055761_Zfp574	ENSRNOG00000055761	308434	Zfp574	1	81952067	81957329	-0.0888257	0.617892	0.919357	D	N	N	280.153	349.579	263.198	527.302	461.345	330.801	289.207	436.219	397.949	300.063	351.569	293.285
ENSRNOG00000055650_Pou2f2	ENSRNOG00000055650	117058	Pou2f2	1	81964104	82004538	0.588064	0.018341	0.338595	U	N	N	26.3913	27.0248	28.8436	21.2279	37.6274	12.328	43.413	23.5558	25.6741	84.6331	66.9252	44.8827
ENSRNOG00000046112_Dedd2	ENSRNOG00000046112	687118	Dedd2	1	82072544	82088275	0.118539	0.494442	0.883557	U	N	N	79.1738	167.38	138.81	163.031	164.415	125.334	146.838	133.483	193.626	167.068	171.125	121.493
ENSRNOG00000047526_Zfp526	ENSRNOG00000047526	687127	Zfp526	1	82089922	82097526	0.287829	0.147725	0.67126	U	N	N	62.933	146.457	98.2484	144.35	161.961	88.3505	150.03	123.014	194.696	117.607	160.112	160.185
ENSRNOG00000020417_Gsk3a	ENSRNOG00000020417	50686	Gsk3a	1	82097247	82108203	0.226698	0.0141002	0.294041	U	N	N	594.818	554.445	521.889	444.088	521.876	480.791	593.736	566.212	647.202	677.065	598.938	581.153
ENSRNOG00000020426_Erf	ENSRNOG00000020426	292721	Erf	1	82112449	82120902	-0.0329698	0.788411	0.958397	D	N	N	479.103	537.882	447.977	467.015	364.004	353.402	415.615	501.652	426.833	379.2	446.45	420.195
ENSRNOG00000056118_Cic	ENSRNOG00000056118	308435	Cic	1	82151669	82163005	0.0901245	0.398746	0.840876	U	N	N	826.249	964.177	769.763	1043.57	891.606	821.865	821.654	982.365	1090.08	847.43	964.908	981.228
ENSRNOG00000020481_Pafah1b3	ENSRNOG00000020481	114113	Pafah1b3	1	82163595	82166363	-0.163474	0.441982	0.86179	D	N	N	312.635	253.685	239.762	245.395	121.88	367.785	180.036	328.909	219.3	259.395	153.335	189.591
ENSRNOG00000052687_Megf8	ENSRNOG00000052687	114029	Megf8	1	82185034	82234045	-0.00470035	0.978681	0.996578	D	N	N	793.768	848.232	858.998	1307.64	942.321	731.46	960.193	957.064	1121.1	523.186	1011.5	894.558
ENSRNOG00000020546_Lipe	ENSRNOG00000020546	25330	Lipe	1	82248046	82266727	0.28352	0.229286	0.744744	U	N	N	166.468	387.937	231.65	168.125	173.413	152.045	358.795	377.766	236.416	208.835	119.449	382.276
ENSRNOG00000037814_Cxcl17	ENSRNOG00000037814	308436	Cxcl17	1	82267381	82279145	-0.296426	0.225706	0.74451	D	N	N	24.3612	312.093	29.7449	174.918	69.5289	552.705	9.57639	35.7699	99.4873	244.007	138.933	91.313
ENSRNOG00000020578_Ceacam1	ENSRNOG00000020578	81613	Ceacam1	1	82327955	82344345	-0.0612174	0.805307	0.962422	D	N	N	412.11	1624.98	619.236	970.541	494.882	589.688	1048.3	386.49	1094.36	409.976	673.487	810.983
ENSRNOG00000020596_Atp5sl	ENSRNOG00000020596	361520	Dmac2	1	82413037	82419131	-0.164248	0.243824	0.754835	D	N	N	505.494	509.113	530.001	425.408	363.186	478.737	413.7	560.977	387.252	391.291	331.237	396.979
ENSRNOG00000020606_B3gnt8	ENSRNOG00000020606	308440	B3gnt8	1	82419947	82422846	-0.0063	0.980847	0.996892	D	N	N	32.4815	40.9732	43.2654	32.2665	42.5353	121.225	34.475	98.5855	72.7434	7.69392	34.7333	58.8118
ENSRNOG00000020607_Bckdha	ENSRNOG00000020607	25244	Bckdha	1	82423277	82452281	0.0648224	0.761121	0.951296	U	N	N	540.006	659.058	609.321	591.835	593.041	1128.01	589.267	1277.25	723.155	517.691	490.502	758.362
ENSRNOG00000020635_Exosc5	ENSRNOG00000020635	308441	Exosc5	1	82452469	82461606	-0.0792747	0.653394	0.930492	D	N	N	308.575	190.917	263.198	209.732	185.683	297.926	207.488	330.654	186.137	245.106	189.763	198.877
ENSRNOG00000028753_B9d2	ENSRNOG00000028753	308443	B9d2	1	82473737	82479900	-0.110278	0.609316	0.918029	D	N	N	99.4747	52.3062	84.728	87.4591	91.6145	73.9679	63.8426	138.718	59.9063	60.4522	63.5366	56.4903
ENSRNOG00000020652_Tgfb1	ENSRNOG00000020652	59086	Tgfb1	1	82480195	82497199	0.144313	0.497525	0.884698	U	N	N	1484	697.415	1037.47	639.386	899.786	673.93	1248.76	800.025	683.574	1393.7	1301.23	728.956
ENSRNOG00000020675_Ccdc97	ENSRNOG00000020675	292724	Ccdc97	1	82503571	82511327	0.00215225	0.982963	0.998009	U	N	N	548.126	448.089	517.382	436.446	486.702	497.229	534.362	529.57	439.67	519.889	490.502	414.004
ENSRNOG00000020683_Hnrnpul1	ENSRNOG00000020683	361522	Hnrnpul1	1	82512745	82546937	0.0729724	0.3201	0.803265	U	N	N	1940.77	1954.51	1797.32	1916.46	1815.93	2147.12	2007.21	1895.81	1921.28	2256.52	1955.23	2132.7
ENSRNOG00000020716_Axl	ENSRNOG00000020716	308444	Axl	1	82549420	82580761	-0.137554	0.302917	0.793766	D	N	N	3767.86	2822.79	3895.69	2980.4	2414.7	3451.83	3317.26	2694.96	2632.67	3352.35	2893.03	2551.35
ENSRNOG00000020743_Cyp2s1	ENSRNOG00000020743	308445	Cyp2s1	1	82595211	82610350	0.264137	0.209626	0.733181	U	N	N	239.551	222.301	139.711	361.724	263.392	343.129	195.997	285.287	271.718	392.39	434.59	391.563
ENSRNOG00000022679_LOC102553892	ENSRNOG00000022679	292711	LOC102553892	1	82831952	82918444	0.0199106	0.934888	0.989544	U	N	N	10.1505	33.1272	203.708	267.472	124.334	20.5466	18.5144	137.845	93.0687	10.9913	178.75	252.272
ENSRNOG00000046222_Ceacam4	ENSRNOG00000046222	103689942	LOC103689942	1	83003841	83010171	-0.106711	0.521826	0.893556	D	N	N	0	8.71769	8.11226	0	6.5439	41.0933	15.9606	0	0	9.89218	0	7.73839
ENSRNOG00000055096_AABR07002768.1	ENSRNOG00000055096	NA	AABR07002768.1	1	83816569	83819689	0.0221124	0.925468	0.989268	U	N	N	36.5417	122.048	58.5885	156.238	139.876	84.2412	79.8032	77.647	121.952	90.1287	119.449	127.683
ENSRNOG00000028891_Cyp2t1	ENSRNOG00000028891	171380	Cyp2t1	1	83965608	83969559	0.137643	0.561521	0.904874	U	N	N	81.2039	82.8181	83.8267	71.3259	93.2505	115.061	103.425	183.212	120.882	47.2626	44.8992	100.599
ENSRNOG00000020947_Egln2	ENSRNOG00000020947	308457	Egln2	1	83969457	83977236	0.0464089	0.754785	0.949395	U	N	N	395.869	433.269	365.953	504.376	484.248	573.251	379.225	623.793	546.645	441.851	423.577	439.541
ENSRNOG00000001500_Rab4b	ENSRNOG00000001500	50866	Rab4b	1	83979298	83990588	-0.112075	0.605093	0.917156	D	N	N	235.491	237.993	230.749	626.649	363.186	304.09	235.579	406.556	287.764	302.261	356.652	225.187
ENSRNOG00000001499_Mia	ENSRNOG00000001499	81510	Mia	1	83991578	83993270	-0.3853	0.117781	0.626062	D	N	N	2915.22	904.025	1482.74	2743.5	1083.83	4031.25	1734.6	2276.19	1190.64	1416.78	893.748	1340.29
ENSRNOG00000001501_Snrpa	ENSRNOG00000001501	292729	Snrpa	1	83999671	84008293	-0.184463	0.43222	0.856522	D	N	N	434.441	231.019	209.116	248.791	219.221	606.126	156.414	361.189	209.672	378.101	216.024	304.893
ENSRNOG00000037715_RGD1560854	ENSRNOG00000037715	499106	RGD1560854	1	84009268	84015983	-0.0864345	0.674631	0.936641	D	N	N	30.4514	30.5119	32.449	31.4174	39.2634	18.492	22.9833	33.1526	31.0229	32.9739	19.4845	34.8228
ENSRNOG00000013945_Itpkc	ENSRNOG00000013945	308451	Itpkc	1	84018859	84040433	0.0742795	0.661477	0.931445	U	N	N	150.227	298.145	211.82	252.188	213.495	180.81	222.172	212.002	307.02	194.546	265.159	195.781
ENSRNOG00000020848_Coq8b	ENSRNOG00000020848	308453	Coq8b	1	84044551	84067066	-0.0103532	0.945188	0.990771	D	N	N	255.792	166.508	149.626	212.279	202.043	149.99	186.42	179.722	191.486	213.231	205.858	148.577
ENSRNOG00000020867_Numbl	ENSRNOG00000020867	292732	Numbl	1	84067938	84091671	-0.0622649	0.74402	0.947826	D	N	N	174.588	168.251	163.147	191.901	150.51	154.1	130.877	261.731	144.417	97.8227	133.003	184.174
ENSRNOG00000020871_Ltbp4	ENSRNOG00000020871	292734	Ltbp4	1	84118046	84150084	0.157341	0.485901	0.877174	U	N	N	822.189	1166.43	1830.67	1016.39	534.964	1226.63	1400.07	2072.91	1023.76	999.11	817.504	1307.01
ENSRNOG00000020882_Shkbp1	ENSRNOG00000020882	292735	Shkbp1	1	84154703	84168074	-0.126071	0.501834	0.884801	D	N	N	306.545	260.659	237.96	291.247	349.28	538.322	308.36	416.153	242.835	256.098	263.465	294.059
ENSRNOG00000055371_Sptbn4	ENSRNOG00000055371	308458	Sptbn4	1	84168495	84254645	0.0305297	0.874435	0.97863	U	N	N	105.565	170.867	124.388	233.507	126.788	232.177	139.177	198.916	150.836	146.184	181.291	201.198
ENSRNOG00000024410_Blvrb	ENSRNOG00000024410	292737	Blvrb	1	84256159	84274075	-0.295479	0.124793	0.638625	D	N	N	316.695	244.967	248.776	212.279	223.31	476.682	245.156	307.971	189.347	194.546	182.138	220.544
ENSRNOG00000037690_Sertad3	ENSRNOG00000037690	499108	Sertad3	1	84280945	84284663	-0.0884739	0.660586	0.931445	D	N	N	87.2941	117.689	104.558	118.876	127.606	149.99	98.3176	197.171	87.72	84.6331	91.4926	95.1822
ENSRNOG00000024363_Sertad1	ENSRNOG00000024363	361526	Sertad1	1	84293102	84296367	-0.157119	0.388889	0.836845	D	N	N	430.38	371.374	488.538	410.973	371.366	604.071	406.677	600.237	342.322	409.976	338.014	256.141
ENSRNOG00000018369_Prx	ENSRNOG00000018369	78960	Prx	1	84304228	84324560	0.0178935	0.936027	0.98964	U	N	N	71.0534	78.4592	63.0953	127.368	62.985	63.6946	49.7972	81.1367	115.534	51.6592	67.7723	111.433
ENSRNOG00000020835_Hipk4	ENSRNOG00000020835	308449	Hipk4	1	84328114	84338483	-0.344955	0.189399	0.715287	D	N	N	12.1806	17.4354	7.2109	49.2488	15.5418	22.6013	5.10741	13.959	19.2556	6.59479	8.47154	23.2152
ENSRNOG00000018390_Pld3	ENSRNOG00000018390	361527	Pld3	1	84339261	84353725	0.117087	0.430947	0.855178	U	N	N	1019.11	936.28	946.43	752.318	1060.93	1204.03	1415.39	1219.67	1074.03	851.826	1040.31	857.414
ENSRNOG00000018408_RGD1307554	ENSRNOG00000018408	292739	RGD1307554	1	84361736	84386751	0.0208089	0.877419	0.979498	U	N	N	213.16	216.199	196.497	185.957	184.865	228.068	151.307	214.62	263.16	209.934	194.845	208.163
ENSRNOG00000018677_Akt2	ENSRNOG00000018677	25233	Akt2	1	84411726	84450162	0.262309	0.0989492	0.598925	U	N	N	639.48	498.652	533.606	298.889	437.623	371.894	644.172	491.182	566.971	575.945	565.052	554.069
ENSRNOG00000023521_Map3k10	ENSRNOG00000023521	308463	Map3k10	1	84473071	84491466	0.182169	0.351454	0.815961	U	N	N	62.933	83.6899	57.6872	79.8171	90.7966	73.9679	61.9273	133.483	103.766	72.5426	66.9252	87.4438
ENSRNOG00000046338_LOC100909824	ENSRNOG00000046338	100909824	LOC100909824	1	84530669	84543966	-0.0154411	0.9465	0.991185	D	N	N	40.6019	34.8708	24.3368	33.1156	31.9015	20.5466	33.8366	14.8314	41.7205	19.7844	30.4975	41.7873
ENSRNOG00000037673_RGD1565183	ENSRNOG00000037673	NA	AABR07071891.2	1	84573496	84573959	-0.372286	0.075093	0.553542	D	N	N	1581.45	1029.56	1363.76	828.739	556.231	1423.88	820.377	1152.49	712.457	943.054	651.461	633.774
ENSRNOG00000018885_LOC100910046	ENSRNOG00000018885	100910046	AABR07071891.1	1	84584596	84598186	-0.126141	0.426667	0.853193	D	N	N	170.528	266.761	225.34	235.206	249.486	182.865	241.963	166.636	196.835	194.546	155.029	259.236
ENSRNOG00000050995_AABR07002774.2	ENSRNOG00000050995	NA	AABR07002774.4	1	84652632	84653384	0.226405	0.389777	0.837429	U	N	N	12.1806	7.84592	18.0272	5.94382	5.72591	4.10933	15.9606	5.23463	6.41853	20.8835	9.31869	15.4768
ENSRNOG00000029805_Zfp780b	ENSRNOG00000029805	NA	AABR07002774.2	1	84685931	84698793	-0.256237	0.324232	0.804566	D	N	N	22.3311	66.2545	40.5613	182.56	125.97	47.2573	45.3282	53.2187	75.9527	39.5687	78.7853	68.0978
ENSRNOG00000018928_LOC102553760	ENSRNOG00000018928	NA	AABR07002774.1	1	84721410	84732242	0.0843058	0.725109	0.945853	U	N	N	6.09029	30.5119	23.4354	36.5121	39.2634	34.9293	19.7912	34.0251	36.3717	25.28	33.8862	40.2396
ENSRNOG00000018936_Zfp780b-ps1	ENSRNOG00000018936	NA	Zfp780b-ps1	1	84879973	84894805	-0.092212	0.673576	0.936373	D	N	N	50.7524	87.1769	89.2348	124.82	109.61	45.2026	56.8199	83.754	108.045	56.0557	84.7154	85.8961
ENSRNOG00000053366_AABR07002784.1	ENSRNOG00000053366	NA	AABR07002784.1	1	84937034	84950210	-0.300152	0.228794	0.744744	D	N	N	18.2709	24.4095	18.9286	44.1541	27.8116	14.3826	16.5991	25.3007	7.48829	25.28	15.2488	20.8937
ENSRNOG00000018994_Psmc4	ENSRNOG00000018994	117262	Psmc4	1	84978206	84986581	0.0283492	0.838525	0.971543	U	N	N	1090.16	794.182	766.158	891.573	957.863	1078.7	1013.18	1039.95	756.317	1157.38	966.603	753.719
ENSRNOG00000019129_Fcgbp	ENSRNOG00000019129	100303643	Fcgbp	1	85003280	85046840	0.00565229	0.97763	0.996548	U	N	N	521.735	9977.4	213.623	3928.02	225.764	137.662	4625.4	242.538	1626.03	251.701	7660.81	930.928
ENSRNOG00000019229_Fbl	ENSRNOG00000019229	292747	Fbl	1	85103519	85112619	-0.158454	0.418991	0.849449	D	N	N	1538.81	910.999	903.165	885.63	760.728	1347.86	769.942	1135.04	641.853	1359.62	835.294	813.305
ENSRNOG00000019254_Dyrk1b	ENSRNOG00000019254	308468	Dyrk1b	1	85112247	85120839	0.173251	0.267886	0.77118	U	N	N	174.588	188.302	205.511	165.578	224.128	201.357	208.127	268.711	300.601	165.969	197.387	186.495
ENSRNOG00000019883_Pak4	ENSRNOG00000019883	292756	Pak4	1	85162452	85201757	0.241647	0.0525212	0.504005	U	N	N	339.026	291.171	254.184	287.002	384.454	314.364	422.638	374.276	412.926	317.649	367.665	334.298
ENSRNOG00000019869_Lrfn1	ENSRNOG00000019869	365222	Lrfn1	1	85291462	85300825	-0.0189805	0.923295	0.988765	D	N	N	44.6621	48.8191	49.5749	34.8138	68.7109	53.4213	60.6505	51.4738	33.1624	53.8574	38.1219	57.2641
ENSRNOG00000019838_Gmfg	ENSRNOG00000019838	113940	Gmfg	1	85312528	85317968	-0.26721	0.293908	0.787238	D	N	N	931.814	300.76	573.266	307.381	428.625	285.598	437.322	246.9	139.068	624.306	472.712	179.531
ENSRNOG00000019831_Samd4b	ENSRNOG00000019831	308473	Samd4b	1	85324043	85362241	0.175668	0.0889975	0.577213	U	N	N	558.277	499.524	586.787	566.361	569.319	581.47	722.698	565.34	744.55	548.466	646.379	585.022
ENSRNOG00000019746_Paf1	ENSRNOG00000019746	361531	Paf1	1	85362268	85368031	-0.00760767	0.955588	0.992791	D	N	N	799.858	700.031	807.62	1157.35	839.255	1148.56	998.498	964.916	850.456	902.386	886.123	813.305
ENSRNOG00000019702_Med29	ENSRNOG00000019702	292751	Med29	1	85368288	85373099	-0.0610065	0.768822	0.953598	D	N	N	296.394	168.251	198.3	191.901	175.867	281.489	195.997	348.975	141.208	219.826	193.998	137.743
ENSRNOG00000058388_Zfp36	ENSRNOG00000058388	79426	Zfp36	1	85380088	85382569	0.104529	0.527864	0.896037	U	N	N	416.17	516.959	531.804	468.713	438.441	421.206	575.222	407.428	416.135	730.922	554.039	352.871
ENSRNOG00000030266_Plekhg2	ENSRNOG00000030266	292750	Plekhg2	1	85386470	85399699	-0.114992	0.60107	0.915826	D	N	N	513.614	502.139	377.671	1145.46	796.719	482.846	495.419	615.941	687.853	336.334	664.169	649.251
ENSRNOG00000019578_Rps16	ENSRNOG00000019578	140655	Rps16	1	85405512	85408444	-0.26546	0.237435	0.750867	D	N	N	24357.1	15290	23864.5	12297.8	8044.08	21189.7	13504	22493.2	11420.7	14847.1	9907.47	10276.6
ENSRNOG00000032034_Supt5h	ENSRNOG00000032034	308472	Supt5h	1	85437780	85466854	0.120982	0.211177	0.734035	U	N	N	1132.79	1192.58	1022.14	1439.25	1300.6	1220.47	1241.74	1466.57	1394.96	1342.04	1306.31	1228.86
ENSRNOG00000037638_Timm50	ENSRNOG00000037638	687295	Timm50	1	85470831	85480407	-0.0940304	0.514275	0.889215	D	N	N	489.253	346.092	361.446	332.005	331.285	474.627	362.626	403.066	288.834	440.752	350.722	314.952
ENSRNOG00000019310_Eid2	ENSRNOG00000019310	685691	Eid2	1	85516653	85517360	0.26832	0.312964	0.798409	U	N	N	4.06019	6.10239	11.7177	9.34029	9.81584	0	9.57639	16.5763	7.48829	7.69392	16.9431	5.41687
ENSRNOG00000019949_Mrps12	ENSRNOG00000019949	292758	Mrps12	1	86920680	86923575	-0.021946	0.907324	0.984996	D	N	N	314.665	217.071	211.82	250.49	284.659	382.167	241.963	442.326	222.509	249.503	225.343	241.438
ENSRNOG00000019962_Sars2	ENSRNOG00000019962	292759	Sars2	1	86923591	86935904	-0.156333	0.416711	0.848135	D	N	N	97.4446	81.0745	72.109	101.894	112.064	160.264	77.888	123.014	70.6039	107.715	77.091	87.4438
ENSRNOG00000020063_Nfkbib	ENSRNOG00000020063	81525	Nfkbib	1	86941074	86948845	0.0942068	0.62517	0.921868	U	N	N	103.535	142.098	127.092	167.276	147.238	141.772	139.815	143.952	120.882	257.197	136.392	103.694
ENSRNOG00000020102_Sirt2	ENSRNOG00000020102	361532	Sirt2	1	86948918	86971952	-0.030231	0.796374	0.960723	D	N	N	609.029	747.106	705.766	833.833	691.199	762.28	618.635	900.356	738.131	717.732	636.213	650.799
ENSRNOG00000025354_Rinl	ENSRNOG00000025354	292760	Rinl	1	86972244	86983514	0.0524655	0.836767	0.970987	U	N	N	40.6019	50.5626	45.9695	54.3435	89.9786	30.82	56.1815	28.7904	25.6741	100.021	90.6455	33.2751
ENSRNOG00000020235_Hnrnpl	ENSRNOG00000020235	80846	Hnrnpl	1	86996093	87006776	-0.160282	0.251851	0.759848	D	N	N	4981.86	3894.19	3542.35	4520.7	3549.25	5140.77	3373.44	5045.31	3246.71	3939.29	3570.75	3537.22
ENSRNOG00000020308_Ech1	ENSRNOG00000020308	64526	Ech1	1	87009730	87016005	-0.0428386	0.802469	0.962121	D	N	N	1151.06	1174.27	1368.27	1245.66	1383.22	1243.07	1631.18	1489.25	1463.43	741.913	1056.4	932.476
ENSRNOG00000020380_Lgals7	ENSRNOG00000020380	29518	Lgals7	1	87045335	87047223	-0.207908	0.398177	0.840697	D	N	N	3242.06	1559.6	2608.54	4794.97	1776.67	5699.64	1960.61	5329.72	2258.25	2264.21	2250.89	1837.87
ENSRNOG00000020389_Capn12	ENSRNOG00000020389	308476	Capn12	1	87066289	87078348	-0.200747	0.396701	0.839472	D	N	N	22.3311	30.5119	19.83	43.305	22.0856	34.9293	21.7065	41.0046	13.9068	20.8835	24.5675	20.1198
ENSRNOG00000020433_Actn4	ENSRNOG00000020433	63836	Actn4	1	87078020	87147333	0.150868	0.141936	0.664016	U	N	N	6043.6	5846.08	5482.98	5818.15	5307.1	6950.93	7694.31	5583.6	7257.22	6021.04	6331.63	6620.97
ENSRNOG00000020598_Kcnk6	ENSRNOG00000020598	100909725	Kcnk6	1	87166109	87174821	0.159976	0.481778	0.874356	U	N	N	255.792	253.685	258.691	400.783	241.306	217.794	591.821	180.595	237.486	223.124	422.73	231.378
ENSRNOG00000020616_LOC103689986	ENSRNOG00000020616	103689986	Yif1b	1	87180624	87191185	-0.237605	0.160197	0.684602	D	N	N	442.561	293.786	370.46	247.093	274.844	452.026	305.806	360.317	280.276	281.378	217.719	270.07
ENSRNOG00000020628_LOC100361913	ENSRNOG00000020628	103690068	LOC103690068	1	87190381	87191588	-0.475195	0.0693787	0.541328	D	N	N	22.3311	38.3578	53.1804	67.0803	36.8094	108.897	19.7912	61.9431	44.9297	18.6852	20.3317	6.96455
ENSRNOG00000020636_Spint2	ENSRNOG00000020636	292770	Spint2	1	87199313	87221892	-0.18716	0.321663	0.803265	D	N	N	4681.4	4864.47	5425.3	6612.93	5027.35	9478.16	6330.63	6935.01	5415.1	3795.3	4040.08	4448.03
ENSRNOG00000020676_Ppp1r14a	ENSRNOG00000020676	114004	Ppp1r14a	1	87224677	87232848	-0.26034	0.319867	0.803265	D	N	N	129.926	19.1789	62.194	41.6068	22.9036	123.28	43.413	87.2438	47.0692	20.8835	46.5935	32.5012
ENSRNOG00000020703_Sipa1l3	ENSRNOG00000020703	292771	Sipa1l3	1	87260835	87468288	0.241097	0.161403	0.685562	U	N	N	523.765	577.111	537.212	677.596	896.514	523.939	799.948	557.488	998.082	571.548	844.613	756.041
ENSRNOG00000055519_Zfp30	ENSRNOG00000055519	NA	AABR07002868.1	1	87563975	87568989	0.162672	0.523513	0.894021	U	N	N	8.12039	17.4354	9.91498	20.3788	12.2698	10.2733	6.38426	17.4488	22.4649	18.6852	11.8602	20.8937
ENSRNOG00000029043_Zfp84	ENSRNOG00000029043	308482	Zfp84	1	87650207	87915794	-0.0108198	0.949137	0.99127	D	N	N	278.123	558.804	365.052	613.063	502.244	376.003	422	443.198	501.715	384.696	481.183	449.6
ENSRNOG00000048116_AABR07002870.1	ENSRNOG00000048116	NA	AABR07002870.1	1	87775992	87777668	0.284307	0.246004	0.756019	U	N	N	8.12039	10.4612	5.40817	12.7368	17.1777	10.2733	12.7685	14.8314	17.1161	14.2887	12.7073	16.2506
ENSRNOG00000020774_LOC103690114	ENSRNOG00000020774	103690114	LOC103690114	1	87790104	87801872	0.0208211	0.929614	0.989268	U	N	N	0	53.1779	61.2926	95.1012	24.5396	57.5306	33.8366	102.948	65.2551	0	62.6894	43.335
ENSRNOG00000046937_Zfp74	ENSRNOG00000046937	103690038	LOC103690038	1	87817893	87825333	0.422363	0.0854207	0.570512	U	N	N	6.09029	14.8201	9.91498	16.1332	13.9058	4.10933	14.6838	13.0866	21.3951	16.487	20.3317	20.8937
ENSRNOG00000020495_Eif3k	ENSRNOG00000020495	292762	Eif3k	1	87927141	87937516	-0.236613	0.266523	0.77118	D	N	N	1689.04	1124.58	1461.11	1401.89	888.334	2095.76	1052.13	2060.7	884.688	1267.3	957.284	815.626
ENSRNOG00000020505_Map4k1	ENSRNOG00000020505	292763	Map4k1	1	87938042	87959569	0.0314186	0.901886	0.983317	U	N	N	347.146	119.432	241.565	209.732	246.214	108.897	212.596	126.503	84.5107	442.95	309.211	142.386
ENSRNOG00000020557_Ryr1	ENSRNOG00000020557	NA	Ryr1	1	87959712	88066101	0.314825	NA	NA	U	NA	NA	162.408	6.10239	8.11226	31.4174	18.8137	14.3826	45.3282	3.48975	1494.45	7.69392	22.8732	20.8937
ENSRNOG00000033744_Rasgrp4	ENSRNOG00000033744	170668	Rasgrp4	1	88078350	88094330	0.116396	0.656316	0.931328	U	N	N	89.3242	35.7425	54.9831	21.2279	51.5332	8.21865	56.1815	21.8109	31.0229	65.9479	82.1739	44.1088
ENSRNOG00000024036_Fam98c	ENSRNOG00000024036	292764	Fam98c	1	88095241	88098785	0.00390302	0.980717	0.996892	U	N	N	184.739	150.816	157.738	224.167	163.597	137.662	132.793	214.62	154.045	158.275	213.483	151.672
ENSRNOG00000051915_Spred3	ENSRNOG00000051915	308478	Spred3	1	88103719	88112683	-0.114349	0.662767	0.931668	D	N	N	24.3612	19.1789	16.2245	67.0803	40.8994	20.5466	29.3676	25.3007	28.8834	7.69392	51.6764	21.6675
ENSRNOG00000023931_Ggn	ENSRNOG00000023931	292765	Ggn	1	88113445	88116548	-0.0011781	0.99628	0.99927	D	N	N	22.3311	13.9483	9.91498	17.8315	18.8137	16.4373	12.1301	7.85194	28.8834	8.79305	20.3317	20.1198
ENSRNOG00000037580_Psmd8	ENSRNOG00000037580	292766	Psmd8	1	88116812	88123643	-0.0996744	0.541152	0.901502	D	N	N	1425.13	903.153	986.991	964.598	1022.48	1471.14	1004.88	1449.99	834.409	1094.73	965.756	906.166
ENSRNOG00000060693_Catsperg	ENSRNOG00000060693	292767	Catsperg	1	88131554	88162583	-0.113191	0.662844	0.931685	D	N	N	12.1806	34.8708	16.2245	118.027	49.8972	24.656	16.5991	41.0046	65.2551	4.39652	53.3707	33.2751
ENSRNOG00000055286_Yif1b	ENSRNOG00000055286	292768	LOC103689986	1	88182155	88192969	0.112933	0.515736	0.889693	U	N	N	0	0.871769	40.5613	0	7.36188	0	5.10741	54.0911	0	19.7844	6.77723	6.19071
ENSRNOG00000056651_LOC103690068	ENSRNOG00000056651	100361913	LOC100361913	1	88192370	88193346	0.00746295	0.976692	0.996345	U	N	N	144.137	55.7932	52.279	101.045	49.8972	43.1479	122.578	66.3053	69.5341	23.0817	108.436	56.4903
ENSRNOG00000046305_LOC103690163	ENSRNOG00000046305	103690163	LOC103690163	1	88206813	88216556	-0.389494	0.0399764	0.461883	D	N	N	152.257	155.175	153.232	166.427	134.15	113.006	103.425	54.9636	135.859	106.616	93.1869	143.934
ENSRNOG00000048894_LOC103690038	ENSRNOG00000048894	365224	Zfp74	1	88232617	88240057	0.422363	0.0854207	0.570512	U	N	N	6.09029	14.8201	9.91498	16.1332	13.9058	4.10933	14.6838	13.0866	21.3951	16.487	20.3317	20.8937
ENSRNOG00000055119_AABR07002882.1	ENSRNOG00000055119	NA	AABR07002882.1	1	88264315	88267181	-0.00912458	0.972488	0.995755	D	N	N	4.06019	10.4612	8.11226	23.7753	9.81584	6.16399	3.19213	16.5763	13.9068	6.59479	11.013	13.1553
ENSRNOG00000030932_Zfp82	ENSRNOG00000030932	499124	Zfp14	1	88350361	88361851	0.0609501	0.809422	0.963797	U	N	N	30.4514	102.869	42.364	155.389	104.702	51.3666	56.1815	143.08	98.4175	63.7496	77.9382	86.67
ENSRNOG00000052023_LOC102547241	ENSRNOG00000052023	NA	AABR07002885.1	1	88374496	88387424	-0.0058402	0.969108	0.995466	D	N	N	0	10.4612	0	13.5859	11.4518	10.2733	0	0	24.6044	0	19.4845	0
ENSRNOG00000048138_Zfp566	ENSRNOG00000048138	502316	Zfp566	1	88415257	88428685	-0.191537	0.314176	0.799413	D	N	N	32.4815	44.4602	43.2654	60.2873	67.8929	47.2573	45.9667	37.5148	55.6273	35.1722	41.5105	41.7873
ENSRNOG00000046867_LOC102549115	ENSRNOG00000046867	NA	Zfp260	1	88451958	88453578	0.193174	0.00909239	0.236915	U	N	N	0	0	0	0	0	0	0	0	20.3254	0	28.8032	13.9291
ENSRNOG00000020762_Zfp260	ENSRNOG00000020762	53982	Zfp260	1	88457594	88465110	-0.0125488	0.900825	0.983317	D	N	N	497.374	650.34	594.899	568.909	622.488	610.235	632.68	574.936	538.087	590.233	505.751	676.335
ENSRNOG00000056062_AABR07002893.1	ENSRNOG00000056062	NA	AABR07002893.1	1	88510895	88516129	0.332104	0.152627	0.680016	U	N	N	8.12039	6.97415	0	0	8.17987	0	3.19213	13.959	8.55805	10.9913	10.1658	7.73839
ENSRNOG00000037556_Zfp420	ENSRNOG00000037556	100359464	Zfp420	1	88542035	88544156	-0.0136742	0.958182	0.993061	D	N	N	6.09029	9.58946	12.6191	33.9647	28.6295	10.2733	13.4069	20.9385	18.1858	10.9913	21.1789	18.5721
ENSRNOG00000047627_AABR07002896.1	ENSRNOG00000047627	NA	AABR07002896.1	1	88557020	88558696	0.284307	0.246004	0.756019	U	N	N	8.12039	10.4612	5.40817	12.7368	17.1777	10.2733	12.7685	14.8314	17.1161	14.2887	12.7073	16.2506
ENSRNOG00000020777_Zfp382	ENSRNOG00000020777	246264	Zfp382	1	88581206	88605697	0.000826869	0.997492	0.999657	U	N	N	10.1505	38.3578	23.4354	70.4768	56.4411	26.7106	17.8759	40.1321	47.0692	15.3878	41.5105	67.324
ENSRNOG00000048194_LOC100912380	ENSRNOG00000048194	NA	Capns1	1	88652446	88657845	-0.0765401	0.525081	0.895083	D	N	N	706.474	589.316	679.627	506.923	535.781	692.422	652.471	648.221	554.133	621.009	519.305	499.9
ENSRNOG00000045655_Tbcb	ENSRNOG00000045655	292777	Tbcb	1	88680856	88686615	-0.118099	0.53532	0.899325	D	N	N	485.193	342.605	491.242	399.934	392.634	639	355.603	649.094	326.275	494.609	353.263	311.857
ENSRNOG00000020799_Polr2i	ENSRNOG00000020799	292778	Polr2i	1	88686731	88688258	-0.37718	0.099112	0.598925	D	N	N	48.7223	41.8449	45.0681	45.0032	39.2634	86.2959	21.0681	60.1982	29.9532	38.4696	36.4276	26.3105
ENSRNOG00000020807_NEWGENE_1306714	ENSRNOG00000020807	308492	NEWGENE_1306714	1	88694824	88734223	0.147784	0.513032	0.889215	U	N	N	91.3543	42.7167	33.3504	49.2488	67.8929	88.3505	43.413	80.2643	58.8366	61.5513	77.091	97.5037
ENSRNOG00000020821_LOC108348122	ENSRNOG00000020821	NA	Clip3	1	88750462	88765220	0.0376453	0.869915	0.977907	U	N	N	8.12039	5.23062	21.6327	3.39647	4.08994	0	4.46898	10.4693	6.41853	23.0817	0	3.8692
ENSRNOG00000025216_Alkbh6	ENSRNOG00000025216	108348106	LOC108348106	1	88766872	88772242	-0.0636707	0.68407	0.940229	D	N	N	146.167	100.253	131.599	115.48	133.332	166.428	116.194	165.763	105.906	136.292	109.283	113.754
ENSRNOG00000047045_Sdhaf1	ENSRNOG00000047045	108348111	Sdhaf1	1	88779478	88780425	-0.0179026	0.916595	0.987103	D	N	N	397.899	240.608	281.225	252.188	278.934	310.254	259.201	404.811	207.533	329.739	295.657	231.378
ENSRNOG00000020839_Lrfn3	ENSRNOG00000020839	308495	Lrfn3	1	88819445	88826302	0.204017	0.397925	0.840538	U	N	N	50.7524	27.8966	45.0681	19.5297	56.4411	36.9839	63.2042	79.3918	35.3019	27.4783	38.9691	42.5611
ENSRNOG00000020845_Tyrobp	ENSRNOG00000020845	361537	Tyrobp	1	88875375	88879303	0.0193273	0.941038	0.990397	U	N	N	1406.86	486.447	825.648	262.377	430.261	480.791	593.736	335.889	305.95	1666.28	681.959	400.849
ENSRNOG00000020849_Hcst	ENSRNOG00000020849	474146	Hcst	1	88879428	88881460	-0.0846341	0.747752	0.947826	D	N	N	89.3242	65.3827	85.6294	54.3435	60.531	26.7106	87.4644	25.3007	8.55805	93.4261	101.658	23.2152
ENSRNOG00000025111_Nfkbid	ENSRNOG00000025111	308496	Nfkbid	1	88885937	88892615	-0.192892	0.462993	0.86771	D	N	N	16.2408	22.666	14.4218	57.74	68.7109	22.6013	12.7685	21.8109	28.8834	35.1722	47.4406	14.7029
ENSRNOG00000020851_Aplp1	ENSRNOG00000020851	502317	Aplp1	1	88897532	88908750	0.191516	0.424126	0.85144	U	N	N	140.077	108.971	137.908	117.178	186.501	113.006	156.414	372.531	112.324	114.31	121.143	93.6345
ENSRNOG00000024677_Arhgap33	ENSRNOG00000024677	100362311	Arhgap33	1	88978344	88989552	-0.0374498	0.885337	0.981442	D	N	N	14.2107	13.0765	9.91498	44.1541	49.0792	22.6013	3.19213	41.877	28.8834	5.49565	33.039	32.5012
ENSRNOG00000024625_Proser3	ENSRNOG00000024625	361541	Proser3	1	88994562	89007041	-0.119774	0.546993	0.902552	D	N	N	245.642	343.477	262.296	529	436.805	404.769	255.37	398.704	441.809	214.331	365.971	337.394
ENSRNOG00000020922_Hspb6	ENSRNOG00000020922	192245	Hspb6	1	89008117	89010256	0.355607	NA	NA	U	NA	NA	213.16	106.356	103.657	153.69	109.61	203.412	95.1255	205.023	928.548	94.5253	87.2569	109.885
ENSRNOG00000020929_Lin37	ENSRNOG00000020929	292787	Lin37	1	89010257	89014189	-0.100002	0.583135	0.910405	D	N	N	138.047	121.176	111.769	172.371	116.972	211.63	119.386	189.319	121.952	137.391	123.684	106.79
ENSRNOG00000020941_Psenen	ENSRNOG00000020941	292788	Psenen	1	89016096	89017290	-0.252355	0.14412	0.666853	D	N	N	706.474	656.442	772.467	650.424	540.689	862.959	582.244	906.463	515.622	505.6	428.66	488.292
ENSRNOG00000024497_U2af1l4	ENSRNOG00000024497	361542	U2af1l4	1	89017479	89019937	-0.200935	0.217617	0.738731	D	N	N	162.408	163.893	169.456	180.862	156.236	236.286	149.392	223.344	139.068	143.986	136.392	117.624
ENSRNOG00000020957_Igflr1	ENSRNOG00000020957	499126	Igflr1	1	89020341	89022219	-0.43465	0.0949408	0.589109	D	N	N	18.2709	7.84592	7.2109	16.1332	23.7216	8.21865	9.57639	8.72438	6.41853	5.49565	11.8602	6.19071
ENSRNOG00000055525_Kmt2b	ENSRNOG00000055525	102550344	Kmt2b	1	89023200	89042176	0.149325	0.505416	0.886787	U	N	N	265.943	557.061	310.068	704.768	725.554	318.473	420.723	426.622	749.899	430.859	662.474	619.845
ENSRNOG00000042465_Zbtb32	ENSRNOG00000042465	688845	Zbtb32	1	89043086	89045586	-0.0143435	0.955657	0.992791	D	N	N	20.301	13.9483	11.7177	24.6244	32.7195	2.05466	8.29954	5.23463	7.48829	48.3618	26.2618	9.28607
ENSRNOG00000024331_Upk1a	ENSRNOG00000024331	365227	Upk1a	1	89060581	89068348	-0.455091	0.0822311	0.569251	D	N	N	8.12039	47.9473	24.3368	16.1332	4.90792	6.16399	6.38426	5.23463	12.8371	7.69392	9.31869	13.1553
ENSRNOG00000024309_Cox6b1	ENSRNOG00000024309	688869	Cox6b1	1	89075975	89084859	-0.258487	0.163263	0.688106	D	N	N	1364.22	832.54	1000.51	955.257	860.522	1773.17	843.361	1219.67	823.712	1050.77	789.548	765.327
ENSRNOG00000024278_Rbm42	ENSRNOG00000024278	361545	Rbm42	1	89099277	89109230	0.0503559	0.72314	0.945853	U	N	N	895.273	795.925	731.906	759.111	722.283	887.615	809.524	1170.81	706.039	903.486	679.418	700.324
ENSRNOG00000024266_Haus5	ENSRNOG00000024266	100362495	Haus5	1	89109750	89124132	-0.0634748	0.729015	0.946164	D	N	N	101.505	123.791	82.9253	153.69	140.694	117.116	70.2269	125.631	113.394	142.887	118.602	118.397
ENSRNOG00000021006_Tmem147	ENSRNOG00000021006	292792	Tmem147	1	89177992	89179825	-0.223634	0.246293	0.756019	D	N	N	716.624	444.602	607.518	389.745	341.919	694.476	395.186	634.262	407.577	482.518	356.652	372.217
ENSRNOG00000021015_Sbsn	ENSRNOG00000021015	292793	Sbsn	1	89202527	89206994	-0.434633	0.0943005	0.588417	D	N	N	24.3612	88.9205	120.782	46.7015	38.4454	61.6399	82.3569	24.4283	39.581	19.7844	34.7333	26.3105
ENSRNOG00000055934_Dmkn	ENSRNOG00000055934	361548	Dmkn	1	89215266	89229696	-0.656176	0.00936237	0.24052	D	N	N	10.1505	71.4851	53.1804	28.0209	4.08994	92.4599	5.10741	13.0866	6.41853	18.6852	14.4016	23.2152
ENSRNOG00000021021_Ffar2	ENSRNOG00000021021	292794	Ffar2	1	89268938	89269930	-0.14955	0.563982	0.905491	D	N	N	40.6019	4.35885	16.2245	10.1894	13.0878	2.05466	14.6838	6.9795	6.41853	18.6852	13.5545	6.19071
ENSRNOG00000024000_Cd22	ENSRNOG00000024000	308501	Cd22	1	89314558	89329418	0.0368669	0.888368	0.982547	U	N	N	103.535	37.4861	71.2076	28.87	39.2634	8.21865	38.3056	35.7699	23.5346	112.111	58.4536	34.8228
ENSRNOG00000053725_Usf2	ENSRNOG00000053725	81817	Usf2	1	89371794	89382463	0.0493943	0.582138	0.910405	U	N	N	657.751	626.802	713.879	592.684	607.764	630.782	633.957	728.486	609.761	724.327	687.889	582.701
ENSRNOG00000021053_Lsr	ENSRNOG00000021053	64355	Lsr	1	89383519	89399041	0.0817563	0.660852	0.931445	U	N	N	1437.31	1461.09	1205.12	1858.72	2051.51	1836.87	2893.98	1693.4	1689.14	1305.77	1615.52	1327.13
ENSRNOG00000021062_Fxyd5	ENSRNOG00000021062	60338	Fxyd5	1	89464860	89474252	0.030931	0.891923	0.983317	U	N	N	1138.88	615.469	868.913	848.268	615.944	951.309	1504.13	482.458	580.877	1144.2	962.367	505.317
ENSRNOG00000021079_Fxyd1	ENSRNOG00000021079	58971	Fxyd1	1	89484199	89488223	-0.0826148	0.738725	0.947372	D	N	N	121.806	122.048	143.317	52.6453	32.7195	53.4213	93.8486	102.948	98.4175	57.1548	52.5236	77.3839
ENSRNOG00000021087_Lgi4	ENSRNOG00000021087	361549	Lgi4	1	89491654	89502974	0.43964	0.0600928	0.52276	U	N	N	109.625	61.0239	99.1498	215.676	110.428	125.334	152.584	280.925	217.16	91.2279	185.527	168.697
ENSRNOG00000021095_Fxyd3	ENSRNOG00000021095	116831	Fxyd3	1	89502562	89509343	-0.0422328	0.84777	0.973131	D	N	N	1486.03	1070.53	1281.74	1987.78	701.833	2434.78	1773.55	1849.57	1528.68	1077.15	1350.36	1043.91
ENSRNOG00000021097_Hpn	ENSRNOG00000021097	29135	Hpn	1	89534106	89543967	-0.106766	0.605168	0.917156	D	N	N	119.776	133.381	118.078	182.56	162.779	135.608	134.069	102.948	239.625	96.7235	97.4227	110.659
ENSRNOG00000021102_Scn1b	ENSRNOG00000021102	29686	Scn1b	1	89550738	89560719	0.134008	0.595849	0.913503	U	N	N	239.551	178.713	339.813	209.732	96.5225	133.553	258.562	219.854	510.273	129.697	130.462	137.743
ENSRNOG00000021106_Gramd1a	ENSRNOG00000021106	361550	Gramd1a	1	89563976	89590490	0.0240781	0.922999	0.988765	U	N	N	192.859	273.736	236.157	658.915	587.315	193.138	231.749	320.185	406.507	265.99	663.322	314.952
ENSRNOG00000028984_RGD1563307	ENSRNOG00000028984	308503	RGD1563307	1	89645769	89646590	0.314306	0.10009	0.601085	U	N	N	28.4214	41.8449	32.449	33.9647	58.0771	41.0933	47.2435	41.877	44.9297	58.2539	59.3008	58.0379
ENSRNOG00000023296_Wtip	ENSRNOG00000023296	NA	AABR07002945.1	1	89967031	90000386	0.0869037	0.666196	0.93258	U	N	N	40.6019	37.4861	50.4763	27.1718	26.9936	36.9839	36.3903	47.1116	41.7205	25.28	43.2049	40.2396
ENSRNOG00000021113_Uba2	ENSRNOG00000021113	308508	Uba2	1	90011306	90035522	0.332359	0.027024	0.394335	U	N	N	440.531	400.142	399.303	298.04	404.086	357.511	452.006	326.292	498.506	619.91	526.083	537.818
ENSRNOG00000021119_Pdcd2l	ENSRNOG00000021119	689637	Pdcd2l	1	90045509	90057923	-0.0838049	0.61155	0.918344	D	N	N	127.896	75.8439	73.0103	86.61	87.5246	71.9132	86.8259	96.8406	67.3946	80.2366	86.4097	65.7763
ENSRNOG00000023150_Gpi	ENSRNOG00000023150	292804	Gpi	1	90063411	90091287	0.0241438	0.875344	0.979038	U	N	N	4374.86	2637.97	2924.92	3235.14	3193.42	4183.3	3807.57	2706.3	3367.59	4498.74	3541.1	2998.63
ENSRNOG00000021129_RGD1308428	ENSRNOG00000021129	308509	RGD1308428	1	90097334	90176105	0.264967	0.0872472	0.573766	U	N	N	438.501	631.161	601.208	736.185	530.874	636.946	929.548	662.18	767.015	531.979	641.296	851.223
ENSRNOG00000021133_Lsm14a	ENSRNOG00000021133	361554	Lsm14a	1	90200876	90246297	-0.0874624	0.243601	0.754835	D	N	N	1278.96	1407.04	1372.77	1451.14	1222.07	1360.19	1419.22	1233.63	1184.22	1315.66	1239.39	1215.7
ENSRNOG00000021137_Kctd15	ENSRNOG00000021137	499129	Kctd15	1	90506697	90520344	0.049041	0.812932	0.965129	U	N	N	272.033	360.912	301.956	554.474	332.103	544.486	308.998	662.18	442.879	287.972	397.315	367.574
ENSRNOG00000022919_Chst8	ENSRNOG00000022919	308511	Chst8	1	90542096	90685257	-0.119344	0.628706	0.922704	D	N	N	42.632	15.6918	47.7722	230.111	174.231	2.05466	143.007	58.4533	39.581	27.4783	104.2	26.3105
ENSRNOG00000052945_AABR07002969.1	ENSRNOG00000052945	NA	AABR07002969.1	1	90820595	90848674	0.189677	0.447216	0.862269	U	N	N	304.514	106.356	157.738	124.82	251.122	106.843	471.797	138.718	198.975	161.572	166.889	142.386
ENSRNOG00000020830_LOC108348128	ENSRNOG00000020830	292781	LOC108348128	1	90951771	90957082	-0.12625	0.5431	0.901569	D	N	N	227.371	205.738	173.963	244.546	199.589	275.325	220.895	247.772	247.114	74.7409	197.387	198.103
ENSRNOG00000047943_LOC108348106	ENSRNOG00000047943	292780	Alkbh6	1	90957133	90962466	-0.36585	0.163601	0.688523	D	N	N	30.4514	13.0765	13.5204	40.7576	33.5375	10.2733	9.57639	13.0866	29.9532	4.39652	20.3317	10.8337
ENSRNOG00000050104_Clip3	ENSRNOG00000050104	308493	LOC108348122	1	90962707	90978907	0.352128	0.179842	0.706721	U	N	N	144.137	145.585	155.936	64.5329	125.97	59.5852	95.7639	569.702	74.8829	81.3357	84.7154	218.223
ENSRNOG00000050560_LOC103690054	ENSRNOG00000050560	103690054	LOC103690054	1	91041214	91042230	-0.273263	0.248944	0.757146	D	N	N	146.167	88.0487	98.2484	87.4591	70.3469	178.756	73.419	159.656	48.139	98.9218	66.078	61.9071
ENSRNOG00000020781_LOC103690005	ENSRNOG00000020781	103690005	LOC103690005	1	91042635	91048483	-0.350045	0.0661352	0.537613	D	N	N	18.2709	13.0765	0	70.4768	12.2698	88.3505	0	14.8314	9.6278	0	9.31869	16.2506
ENSRNOG00000045747_Capns1	ENSRNOG00000045747	NA	LOC100912380	1	91058529	91063928	-0.0765401	0.525081	0.895083	D	N	N	706.474	589.316	679.627	506.923	535.781	692.422	652.471	648.221	554.133	621.009	519.305	499.9
ENSRNOG00000013250_NEWGENE_1310561	ENSRNOG00000013250	292814	NEWGENE_1310561	1	91173473	91178801	0.0419939	0.864259	0.977093	U	N	N	71.0534	0	30.6463	64.5329	92.4325	226.013	44.6898	160.529	110.185	76.9392	29.6504	106.016
ENSRNOG00000021144_Cebpg	ENSRNOG00000021144	25301	Cebpg	1	91287917	91296656	-0.232434	0.00376859	0.156723	D	N	N	846.55	817.72	848.182	866.949	844.981	918.435	737.382	827.943	654.69	680.362	676.876	773.065
ENSRNOG00000010918_Cebpa	ENSRNOG00000010918	24252	Cebpa	1	91363492	91366164	0.0599856	0.762696	0.95136	U	N	N	560.307	474.243	469.61	283.605	319.015	641.055	456.475	584.533	321.996	640.793	381.219	495.257
ENSRNOG00000010938_Slc7a10	ENSRNOG00000010938	114518	Slc7a10	1	91433030	91448564	0.559196	0.0236868	0.374208	U	N	N	12.1806	41.8449	12.6191	2.54735	4.90792	10.2733	52.9894	31.4078	40.6507	19.7844	5.08292	106.79
ENSRNOG00000011451_Lrp3	ENSRNOG00000011451	89787	Lrp3	1	91448361	91462603	0.14345	0.572336	0.908176	U	N	N	18.2709	57.5368	45.9695	18.6806	31.9015	20.5466	31.2829	48.8565	40.6507	49.4609	13.5545	46.4303
ENSRNOG00000011584_Gpatch1	ENSRNOG00000011584	292810	Gpatch1	1	91529112	91578048	0.188737	0.388723	0.836845	U	N	N	32.4815	118.561	73.0103	120.575	137.422	92.4599	99.5944	90.7335	137.998	118.706	125.379	116.076
ENSRNOG00000032232_Snrpg	ENSRNOG00000032232	687679	LOC687679	1	91588228	91588609	-0.0959005	0.564273	0.905491	D	N	N	385.718	73.2286	109.065	164.729	0	392.441	0	232.941	132.65	229.718	36.4276	0.773839
ENSRNOG00000011885_Rhpn2	ENSRNOG00000011885	308516	Rhpn2	1	91596397	91657395	-0.0757	0.767953	0.953288	D	N	N	109.625	556.189	259.592	277.661	201.225	458.19	278.992	181.467	431.112	131.896	173.667	512.281
ENSRNOG00000022393_Faap24	ENSRNOG00000022393	502320	Faap24	1	91657263	91663467	-0.0770306	0.689845	0.94094	D	N	N	56.8427	32.2555	40.5613	30.5682	35.9914	41.0933	37.0287	46.2392	27.8136	41.767	31.3447	32.5012
ENSRNOG00000012140_Cep89	ENSRNOG00000012140	292811	Cep89	1	91663736	91706094	0.304643	0.0471667	0.48666	U	N	N	160.378	201.379	120.782	195.297	213.495	215.74	190.889	269.583	226.788	239.611	210.941	260.01
ENSRNOG00000059386_Nudt19	ENSRNOG00000059386	308518	Nudt19	1	91820342	91832058	0.0655647	0.693517	0.942315	U	N	N	119.776	115.945	128.895	136.708	124.334	174.646	137.9	201.533	109.115	150.581	127.073	111.433
ENSRNOG00000052814_Ankrd27	ENSRNOG00000052814	361555	Ankrd27	1	91857057	91958763	0.156177	0.422516	0.850307	U	N	N	243.612	395.783	268.606	549.379	525.148	246.56	404.762	383.873	501.715	394.588	437.979	426.385
ENSRNOG00000050827_Pdcd5	ENSRNOG00000050827	292814	Pdcd5	1	91961020	91966418	-0.34985	0.0489864	0.492151	D	N	N	448.651	367.015	319.983	359.177	237.216	295.872	254.732	251.262	172.231	335.235	313.447	204.294
ENSRNOG00000021573_Dpy19l3	ENSRNOG00000021573	308519	Dpy19l3	1	92002927	92069160	-0.0155619	0.91571	0.986947	D	N	N	347.146	340.862	423.64	253.886	359.096	211.63	314.744	318.44	331.624	327.541	317.683	311.857
ENSRNOG00000013565_Zfp507	ENSRNOG00000013565	292816	Zfp507	1	92087215	92120009	0.226887	0.285559	0.779016	U	N	N	85.2641	175.226	101.854	156.238	201.225	110.952	149.392	109.055	233.207	130.797	182.985	215.127
ENSRNOG00000013938_Tshz3	ENSRNOG00000013938	308523	Tshz3	1	92703080	92774975	0.05066	0.845756	0.973022	U	N	N	24.3612	44.4602	37.8572	11.8876	26.1756	12.328	24.8986	47.9841	11.7673	25.28	16.0959	42.5611
ENSRNOG00000014463_Uri1	ENSRNOG00000014463	308537	Uri1	1	94346514	94404211	-0.129893	0.180867	0.707861	D	N	N	495.344	466.397	478.623	500.979	467.071	530.103	448.175	492.927	369.066	507.798	403.245	448.827
ENSRNOG00000014786_Ccne1	ENSRNOG00000014786	25729	Ccne1	1	94485832	94494980	-0.159495	0.543017	0.901569	D	N	N	168.498	41.8449	37.8572	44.1541	100.612	191.084	19.7912	129.993	49.2088	90.1287	74.5496	103.694
ENSRNOG00000014966_LOC690000	ENSRNOG00000014966	690000	LOC690000	1	94579080	94587219	0.105229	0.612081	0.918344	U	N	N	430.38	388.809	373.164	289.549	306.745	507.502	340.281	314.95	309.159	790.275	387.149	367.574
ENSRNOG00000027724_Plekhf1	ENSRNOG00000027724	308543	Plekhf1	1	94609377	94610854	-0.0280362	0.877822	0.979498	D	N	N	136.016	243.224	183.878	238.602	159.507	275.325	239.41	180.595	253.532	139.59	188.068	206.615
ENSRNOG00000027646_Pop4	ENSRNOG00000027646	292831	Pop4	1	94661128	94669461	0.0486135	0.719714	0.945853	U	N	N	194.889	206.609	184.779	213.129	188.137	246.56	190.889	237.303	162.603	268.188	220.26	196.555
ENSRNOG00000032204_Uqcrb	ENSRNOG00000032204	NA	Uqcrb	1	94718402	94718876	-0.377121	0.0542213	0.510441	D	N	N	355.267	246.711	287.534	298.04	202.043	517.775	199.827	316.695	215.021	263.791	199.928	191.138
ENSRNOG00000015168_LOC365238	ENSRNOG00000015168	365238	LOC365238	1	94780650	94784451	-0.0564483	0.827133	0.96895	D	N	N	8.12039	18.3072	13.5204	22.9262	23.7216	26.7106	6.38426	32.2802	14.9766	13.1896	26.2618	13.9291
ENSRNOG00000059938_AC120712.2	ENSRNOG00000059938	NA	AC120712.4	1	94793195	94810667	0.243341	0.345309	0.812018	U	N	N	0	35.7425	6.30953	7.64206	13.0878	24.656	33.8366	10.4693	27.8136	20.8835	33.039	7.73839
ENSRNOG00000052237_AABR07071904.1	ENSRNOG00000052237	NA	AABR07071904.1	1	94836296	94840706	0.417827	0.113925	0.617666	U	N	N	2.0301	7.84592	6.30953	8.49118	11.4518	2.05466	10.8532	8.72438	9.6278	7.69392	13.5545	18.5721
ENSRNOG00000037366_Zfp939	ENSRNOG00000037366	NA	AABR07003056.1	1	95397991	95405285	-0.126044	0.375082	0.828203	D	N	N	12.1806	0.871769	13.5204	20.3788	16.3597	0	0	0	0	0	0	22.4413
ENSRNOG00000017456_Vstm2b	ENSRNOG00000017456	361560	Vstm2b	1	97632473	97660962	-0.000440249	0.998567	0.999657	D	N	N	0	9.58946	1.80272	16.1332	22.9036	2.05466	5.74583	13.0866	4.27902	5.49565	22.026	3.8692
ENSRNOG00000014455_LOC499136	ENSRNOG00000014455	499136	LOC499136	1	97783806	97785490	-0.254506	0.335596	0.807045	D	N	N	8.12039	28.7684	10.8163	42.4559	22.9036	10.2733	9.57639	9.59682	18.1858	5.49565	19.4845	27.0844
ENSRNOG00000014380_LOC102555672	ENSRNOG00000014380	NA	AABR07003176.1	1	98228573	98231855	-0.632261	0.00366612	0.156322	D	N	N	44.6621	101.125	75.7144	144.35	105.52	113.006	56.8199	68.0501	63.1156	39.5687	38.9691	68.8717
ENSRNOG00000037331_Cd33	ENSRNOG00000037331	NA	Cd33	1	98398660	98402968	0.115139	0.661205	0.931445	U	N	N	34.5116	29.6402	46.8708	5.09471	15.5418	10.2733	43.413	11.3417	19.2556	41.767	40.6634	11.6076
ENSRNOG00000023411_Vsig10l	ENSRNOG00000023411	308556	Vsig10l	1	98459834	98467262	0.180557	0.393745	0.838238	U	N	N	184.739	95.0229	102.755	70.4768	98.1584	84.2412	178.121	83.754	123.022	109.913	144.016	96.7299
ENSRNOG00000017851_Etfb	ENSRNOG00000017851	292845	Etfb	1	98472745	98486976	-0.239018	0.287784	0.781011	D	N	N	743.015	433.269	548.028	627.498	553.777	1051.99	499.249	1043.44	415.065	433.058	362.582	422.516
ENSRNOG00000017749_Nkg7	ENSRNOG00000017749	171062	Nkg7	1	98492828	98493978	0.184266	0.482745	0.874906	U	N	N	26.3913	71.4851	109.966	18.6806	110.428	34.9293	95.7639	20.0661	33.1624	178.059	116.06	50.2995
ENSRNOG00000037339_Siglec10	ENSRNOG00000037339	292844	Siglec10	1	98512625	98521706	-0.297268	0.215824	0.736882	D	N	N	16.2408	39.2296	22.534	4.24559	4.90792	0	12.7685	14.8314	3.20927	7.69392	1.69431	3.8692
ENSRNOG00000021474_Siglec5	ENSRNOG00000021474	292843	Siglec5	1	98562346	98570949	-0.132403	0.596955	0.914181	D	N	N	22.3311	95.0229	46.8708	1.69824	4.90792	39.0386	28.0907	58.4533	19.2556	13.1896	12.7073	29.4059
ENSRNOG00000024056_Dzf17	ENSRNOG00000024056	100360772	Zfp17	1	98627372	98629936	-0.208752	0.325932	0.804764	D	N	N	99.4747	199.635	166.752	320.966	234.762	168.482	128.962	170.125	223.579	120.904	198.234	157.089
ENSRNOG00000023233_LOC102546648	ENSRNOG00000023233	102546648	LOC102546648	1	99486253	99496209	0.0918689	0.618157	0.919357	U	N	N	40.6019	54.9215	54.9831	61.1365	66.2569	34.9293	57.4583	61.9431	51.3483	78.0383	54.2179	44.1088
ENSRNOG00000033729_Zfp719	ENSRNOG00000033729	102556967	LOC102556967	1	99505677	99512489	-0.195191	0.409336	0.846309	D	N	N	50.7524	106.356	70.3062	149.445	159.507	78.0772	63.2042	83.754	128.371	47.2626	85.5626	106.016
ENSRNOG00000030160_Zfp819	ENSRNOG00000030160	308561	Zfp819	1	99532568	99539227	-0.0929066	0.723475	0.945853	D	N	N	4.06019	7.84592	7.2109	22.0771	14.7238	10.2733	7.02269	5.23463	17.1161	12.0904	9.31869	10.8337
ENSRNOG00000022640_Siglec8	ENSRNOG00000022640	NA	AABR07003235.1	1	99578372	99587205	0.0418696	0.869177	0.977533	U	N	N	119.776	22.666	76.6158	5.09471	22.9036	8.21865	66.3963	27.918	14.9766	81.3357	58.4536	24.7628
ENSRNOG00000018334_Ctu1	ENSRNOG00000018334	292847	Ctu1	1	99599620	99605412	0.133182	0.305783	0.794721	U	N	N	115.715	104.612	117.177	90.8556	81.7987	104.788	109.809	109.055	125.161	102.219	110.977	115.302
ENSRNOG00000019132_Fv1	ENSRNOG00000019132	308568	Fv1	1	100224401	100226725	-0.0056372	0.977643	0.996548	D	N	N	160.378	265.018	177.568	422.011	280.57	283.544	214.511	362.934	268.509	240.71	286.338	213.58
ENSRNOG00000019138_Clec11a	ENSRNOG00000019138	29313	Clec11a	1	100289295	100293558	0.144713	0.530062	0.896669	U	N	N	432.411	611.982	758.045	243.697	260.938	279.434	715.037	539.167	334.834	427.562	480.336	465.851
ENSRNOG00000019318_Syt3	ENSRNOG00000019318	25731	Syt3	1	100379186	100408083	0.0798851	0.747585	0.947826	U	N	N	30.4514	25.2813	25.2381	15.2841	40.0814	26.7106	26.8139	56.7085	26.7439	21.9826	31.3447	13.1553
ENSRNOG00000019442_Josd2	ENSRNOG00000019442	292876	Josd2	1	100473643	100477351	-0.117526	0.562691	0.905158	D	N	N	231.431	162.149	178.47	177.466	179.957	302.036	143.007	321.93	169.021	174.762	160.959	138.517
ENSRNOG00000019532_Emc10	ENSRNOG00000019532	292878	Emc10	1	100495119	100501437	-0.100868	0.524882	0.895083	D	N	N	2377.24	1477.65	1857.71	1298.3	1285.88	2011.52	1952.94	1657.63	1449.52	1588.24	1441.86	1431.6
ENSRNOG00000019627_Mybpc2	ENSRNOG00000019627	292879	Mybpc2	1	100506704	100530183	0.274649	NA	NA	U	NA	NA	288.274	21.7942	5.40817	44.1541	34.3555	34.9293	7.66111	27.0456	2605.92	8.79305	20.3317	14.7029
ENSRNOG00000019660_Spib	ENSRNOG00000019660	499146	Spib	1	100531457	100537377	0.225212	0.361007	0.822544	U	N	N	36.5417	21.7942	31.5477	24.6244	29.4475	0	27.4523	20.0661	4.27902	135.193	29.6504	16.2506
ENSRNOG00000019681_Pold1	ENSRNOG00000019681	59294	Pold1	1	100537900	100554488	0.122554	0.564646	0.905491	U	N	N	245.642	187.43	119.881	151.992	197.135	265.052	108.532	260.859	193.626	308.856	193.998	227.509
ENSRNOG00000019812_Nr1h2	ENSRNOG00000019812	58851	Nr1h2	1	100554544	100559942	0.137581	0.167006	0.694579	U	N	N	785.647	705.261	724.695	712.41	656.844	610.235	838.892	718.016	749.899	906.783	753.967	666.275
ENSRNOG00000019854_Napsa	ENSRNOG00000019854	60575	Napsa	1	100577056	100589836	-0.0746466	0.772958	0.954314	D	N	N	818.129	123.791	375.868	159.634	202.043	39.0386	237.494	153.549	94.1385	722.129	193.151	113.754
ENSRNOG00000020014_Myh14	ENSRNOG00000020014	308572	Myh14	1	100608966	100671074	0.366432	0.111104	0.61464	U	N	N	905.423	1223.09	926.6	1662.57	1338.23	918.435	3376.63	1073.97	1687	979.326	1583.33	1121.29
ENSRNOG00000026572_Zfp473	ENSRNOG00000026572	292884	Zfp473	1	100736243	100746021	0.114658	0.660625	0.931445	U	N	N	6.09029	12.2048	4.50681	14.435	7.36188	20.5466	10.2148	7.85194	17.1161	5.49565	12.7073	20.1198
ENSRNOG00000026517_Vrk3	ENSRNOG00000026517	361565	Vrk3	1	100755682	100783004	0.0572377	0.511789	0.888315	U	N	N	438.501	462.038	460.596	524.755	522.694	525.994	467.966	553.126	539.157	513.294	522.694	467.399
ENSRNOG00000020060_Atf5	ENSRNOG00000020060	282840	Atf5	1	100808241	100810522	0.0563583	0.745687	0.947826	U	N	N	454.742	339.118	465.103	340.496	391.816	528.049	550.962	581.916	454.646	304.459	332.932	400.075
ENSRNOG00000048733_Nup62	ENSRNOG00000048733	65274	Nup62	1	100811755	100827111	0.11444	0.445087	0.862269	U	N	N	694.293	532.651	493.946	479.751	455.619	721.187	571.391	584.533	535.948	824.348	581.995	571.867
ENSRNOG00000020148_Il4i1	ENSRNOG00000020148	100360621	Il4i1	1	100830064	100836677	0.152888	0.555447	0.903791	U	N	N	79.1738	35.7425	54.0817	78.9679	57.2591	28.7653	52.3509	23.5558	38.5112	161.572	80.4796	45.6565
ENSRNOG00000020191_Tbc1d17	ENSRNOG00000020191	292886	Tbc1d17	1	100836990	100845392	0.114643	0.377182	0.830366	U	N	N	422.26	567.522	599.406	473.808	424.535	396.55	552.877	598.492	574.459	488.014	454.075	484.423
ENSRNOG00000020289_Akt1s1	ENSRNOG00000020289	292887	Akt1s1	1	100845563	100851960	-0.0871944	0.454283	0.865212	D	N	N	424.29	423.68	442.569	471.26	444.985	562.978	402.847	543.529	425.763	444.049	368.512	408.587
ENSRNOG00000020318_Pnkp	ENSRNOG00000020318	308576	Pnkp	1	100853902	100859084	-0.0228959	0.872328	0.978085	D	N	N	251.732	193.533	203.708	303.984	254.394	279.434	257.924	284.415	223.579	222.024	269.395	198.877
ENSRNOG00000020358_Ptov1	ENSRNOG00000020358	292888	Ptov1	1	100859349	100865894	0.0559919	0.732877	0.946848	U	N	N	1360.16	1006.02	1137.52	1069.04	1027.39	1559.49	1064.89	1872.25	1160.68	1210.14	982.699	1177.01
ENSRNOG00000020363_Med25	ENSRNOG00000020363	292889	Med25	1	100874976	100887853	0.0689869	0.527306	0.895797	U	N	N	594.818	635.52	522.79	683.54	674.839	534.213	695.884	636.007	735.992	542.971	637.907	592.761
ENSRNOG00000053084_Fuz	ENSRNOG00000053084	308577	Fuz	1	100891866	100896807	0.0151657	0.938706	0.989916	U	N	N	64.9631	84.5616	82.9253	84.0626	66.2569	92.4599	80.4417	134.355	82.3712	63.7496	56.7593	63.4548
ENSRNOG00000026243_Ap2a1	ENSRNOG00000026243	308578	Ap2a1	1	100896947	100926335	0.144874	0.128307	0.645243	U	N	N	761.286	686.954	661.6	605.421	819.623	698.586	852.937	826.199	713.527	788.077	787.006	721.992
ENSRNOG00000026163_Cpt1c	ENSRNOG00000026163	308579	Cpt1c	1	100955095	100969560	-0.179837	0.245631	0.756019	D	N	N	89.3242	103.741	118.98	128.217	130.06	78.0772	84.2722	107.31	109.115	103.318	94.0341	78.9316
ENSRNOG00000026109_Prmt1	ENSRNOG00000026109	60421	Prmt1	1	100971273	100980340	-0.118112	0.51174	0.888315	D	N	N	921.664	503.883	622.841	687.785	610.218	936.927	515.21	830.561	502.785	852.926	621.811	564.129
ENSRNOG00000020486_Bcl2l12	ENSRNOG00000020486	361567	Bcl2l12	1	100984550	100993269	-0.173049	0.31226	0.798409	D	N	N	194.889	124.663	127.993	124.82	127.606	193.138	109.171	160.529	110.185	152.779	135.545	101.373
ENSRNOG00000043388_Irf3	ENSRNOG00000043388	292892	Irf3	1	100992405	100997198	-0.157616	0.510465	0.888315	D	N	N	241.581	367.015	261.395	826.191	559.503	336.965	245.156	512.121	461.065	213.231	470.17	324.239
ENSRNOG00000056946_Scaf1	ENSRNOG00000056946	56081	Scaf1	1	100997745	101008266	0.101412	0.460259	0.866548	U	N	N	749.106	869.154	655.29	1136.97	1023.3	901.997	828.677	1101.89	1038.73	947.451	953.048	894.558
ENSRNOG00000037247_Rras	ENSRNOG00000037247	361568	Rras	1	101012822	101016720	-0.138087	0.457385	0.866104	D	N	N	574.517	446.346	498.453	651.273	430.261	698.586	487.119	802.643	432.181	349.524	420.188	451.922
ENSRNOG00000059408_Prr12	ENSRNOG00000059408	361569	Prr12	1	101023106	101046208	0.206227	0.107077	0.610363	U	N	N	521.735	628.546	474.116	570.607	638.848	587.634	552.877	819.219	760.596	574.845	592.161	690.264
ENSRNOG00000020517_Prrg2	ENSRNOG00000020517	361570	Prrg2	1	101046563	101054851	-0.0507802	0.775775	0.954898	D	N	N	160.378	156.047	194.694	173.22	154.6	283.544	199.827	214.62	200.044	125.301	137.239	192.686
ENSRNOG00000020543_Nosip	ENSRNOG00000020543	292894	Nosip	1	101055622	101072938	-0.166997	0.399042	0.841147	D	N	N	239.551	252.813	250.579	343.893	235.58	472.573	220.895	403.939	257.811	264.891	216.871	192.686
ENSRNOG00000043007_Rcn3	ENSRNOG00000043007	494125	Rcn3	1	101076898	101086198	-0.195059	0.336398	0.807148	D	N	N	491.283	524.805	609.321	431.352	366.458	682.148	379.863	770.363	333.764	360.515	313.447	470.494
ENSRNOG00000020583_Fcgrt	ENSRNOG00000020583	29558	Fcgrt	1	101086877	101095594	-0.115619	0.554507	0.903791	D	N	N	2113.33	1491.6	2019.95	1102.15	1028.21	1173.21	1721.2	1819.03	1231.29	1050.77	1175	1108.91
ENSRNOG00000020595_Rps11	ENSRNOG00000020595	81774	Rps11	1	101116635	101118825	-0.268081	0.192308	0.718156	D	N	N	16882.3	11348.7	15710.7	11018.1	7440.41	15099.7	9229.09	16512.6	8247.82	12133.3	8392.76	7124.74
ENSRNOG00000062298_Rpl13a	ENSRNOG00000062298	317646	Rpl13a	1	101120325	101123402	-0.220956	0.27998	0.776593	D	N	N	22408.2	16114.7	24047.4	16159.6	11023.2	25198.4	14887.5	25421.1	13285.3	17567.4	12822.5	11257
ENSRNOG00000020618_Rpl13a	ENSRNOG00000020618	NA	Gm45713	1	101120711	101131193	0.0200737	0.935296	0.989609	U	N	N	22.3311	11.333	18.0272	8.49118	11.4518	0	11.4917	0	8.55805	9.89218	25.4146	19.346
ENSRNOG00000056212_Flt3lg	ENSRNOG00000056212	103691134	Flt3lg	1	101124479	101131413	-0.21734	0.204043	0.730343	D	N	N	64.9631	80.2028	87.4321	75.5715	94.8865	78.0772	82.3569	47.9841	66.3249	79.1374	80.4796	52.6211
ENSRNOG00000020623_Aldh16a1	ENSRNOG00000020623	361571	Aldh16a1	1	101138248	101151320	-0.132863	0.399292	0.841203	D	N	N	1088.13	614.597	715.681	608.817	648.664	862.959	656.302	792.173	578.738	822.15	617.575	617.524
ENSRNOG00000020634_Pih1d1	ENSRNOG00000020634	292898	Pih1d1	1	101152734	101156805	-0.102305	0.594772	0.913279	D	N	N	101.505	82.8181	79.3198	102.743	89.9786	137.662	82.9954	131.738	67.3946	83.534	110.977	63.4548
ENSRNOG00000020695_Tead2	ENSRNOG00000020695	308582	Tead2	1	101213788	101230477	0.129679	0.579788	0.910366	U	N	N	353.237	287.684	212.721	275.114	274.026	228.068	293.676	668.287	243.904	208.835	145.71	283.225
ENSRNOG00000020699_Cd37	ENSRNOG00000020699	29185	Cd37	1	101230533	101236065	-0.066258	0.801092	0.961698	D	N	N	598.878	246.711	447.076	184.259	354.188	98.6239	424.553	107.31	81.3014	547.367	454.922	147.029
ENSRNOG00000020714_Trpm4	ENSRNOG00000020714	171143	Trpm4	1	101293409	101323960	-0.0663243	0.738829	0.947406	D	N	N	347.146	693.928	447.076	672.501	569.319	583.524	446.26	424.005	801.247	326.442	532.86	608.238
ENSRNOG00000020719_Hrc	ENSRNOG00000020719	292905	Hrc	1	101324652	101328435	0.373079	NA	NA	U	NA	NA	36.5417	18.3072	15.3232	15.2841	4.08994	24.656	11.4917	11.3417	317.717	2.19826	7.62439	13.9291
ENSRNOG00000020731_Ppfia3	ENSRNOG00000020731	140591	Ppfia3	1	101327998	101351879	-0.135016	0.60655	0.917156	D	N	N	8.12039	26.1531	2.70409	19.5297	26.9936	24.656	5.74583	30.5353	19.2556	7.69392	9.31869	16.2506
ENSRNOG00000020763_Snrnp70	ENSRNOG00000020763	361574	Snrnp70	1	101367471	101388129	-0.102056	0.620512	0.91971	D	N	N	1220.09	1512.52	1087.04	3065.31	2271.55	2032.06	1235.99	2075.53	1807.89	1577.25	1928.12	1632.8
ENSRNOG00000020779_Kcna7	ENSRNOG00000020779	365241	Kcna7	1	101397828	101403320	0.380942	NA	NA	U	NA	NA	12.1806	6.97415	3.60545	5.94382	14.7238	4.10933	3.19213	5.23463	80.2317	12.0904	7.62439	6.96455
ENSRNOG00000020783_Ntf4	ENSRNOG00000020783	25730	Ntf4	1	101405314	101408145	-0.156238	0.353192	0.817673	D	N	N	75.1136	67.998	57.6872	86.61	70.3469	80.1319	49.7972	61.0706	62.0458	86.8313	55.9122	71.967
ENSRNOG00000047040_Lhb	ENSRNOG00000047040	25329	Lhb	1	101410019	101413724	-0.0570459	0.828481	0.968955	D	N	N	4.06019	17.4354	4.50681	25.4735	20.4497	16.4373	10.8532	9.59682	26.7439	8.79305	13.5545	14.7029
ENSRNOG00000020793_Ruvbl2	ENSRNOG00000020793	292907	Ruvbl2	1	101413766	101426852	-0.0146871	0.929216	0.989268	D	N	N	623.24	459.422	429.048	545.983	556.231	727.351	443.068	553.998	477.111	810.059	518.458	493.709
ENSRNOG00000020812_Gys1	ENSRNOG00000020812	690987	Gys1	1	101427195	101447092	0.0920844	0.63901	0.925855	U	N	N	637.45	382.707	319.983	698.824	619.216	659.547	504.995	398.704	787.34	679.263	639.601	568.772
ENSRNOG00000020843_LOC100360087	ENSRNOG00000020843	29292	LOC100360087	1	101448346	101449829	-0.0742188	0.703812	0.943634	D	N	N	4616.44	3480.97	3863.24	1918.16	2098.95	3893.59	3190.85	3609.27	2364.16	3690.88	3316.61	2504.14
ENSRNOG00000020876_Bax	ENSRNOG00000020876	24887	Bax	1	101451802	101457207	-0.176107	0.335709	0.807045	D	N	N	560.307	387.937	449.78	537.491	418.809	581.47	346.665	613.324	316.648	569.35	385.455	311.857
ENSRNOG00000020883_Dhdh	ENSRNOG00000020883	691002	Dhdh	1	101466677	101476867	-0.0158853	0.951723	0.991339	D	N	N	2.0301	12.2048	6.30953	28.87	22.0856	4.10933	8.29954	10.4693	27.8136	5.49565	11.8602	13.1553
ENSRNOG00000020889_Nucb1	ENSRNOG00000020889	84595	Nucb1	1	101480145	101500850	0.178491	0.119364	0.62927	U	N	N	3112.14	4072.91	4130.94	3608.75	3619.59	3860.71	5484.08	3964.36	4341.07	3943.68	4115.47	3677.28
ENSRNOG00000020938_Ppp1r15a	ENSRNOG00000020938	171071	Ppp1r15a	1	101511901	101514974	0.310955	0.114288	0.618209	U	N	N	127.896	305.119	261.395	334.552	327.195	262.997	310.275	506.886	351.95	301.162	371.901	266.201
ENSRNOG00000020942_Plekha4	ENSRNOG00000020942	308584	Plekha4	1	101517714	101540802	0.0273874	0.91148	0.985452	U	N	N	192.859	257.172	195.596	337.949	155.418	388.331	137.9	521.718	284.555	187.951	125.379	311.857
ENSRNOG00000020956_Bcat2	ENSRNOG00000020956	64203	Bcat2	1	101554642	101572080	-0.0279253	0.850346	0.973565	D	N	N	414.14	310.35	402.007	294.644	409.811	404.769	388.801	451.05	278.136	427.562	317.683	319.596
ENSRNOG00000020995_Fut1	ENSRNOG00000020995	81919	Fut1	1	101599018	101602436	0.0830507	0.713329	0.945682	U	N	N	211.13	217.942	153.232	180.013	429.443	143.826	374.756	198.043	244.974	191.249	265.159	170.245
ENSRNOG00000021004_Rasip1	ENSRNOG00000021004	292912	Rasip1	1	101610773	101621646	-0.147529	0.517557	0.891806	D	N	N	306.545	157.79	314.575	224.167	128.424	193.138	177.482	352.465	164.742	131.896	131.309	195.007
ENSRNOG00000021011_Fut2	ENSRNOG00000021011	58924	Fut2	1	101631635	101651668	-0.183512	0.458537	0.866266	D	N	N	36.5417	160.406	10.8163	199.543	76.8908	18.492	190.251	27.0456	33.1624	10.9913	59.3008	22.4413
ENSRNOG00000021017_Car11	ENSRNOG00000021017	308588	Car11	1	101682172	101687293	-0.149394	0.546235	0.902488	D	N	N	20.301	50.5626	44.1667	49.2488	88.3426	26.7106	30.006	70.6675	44.9297	34.0731	28.8032	36.3704
ENSRNOG00000021027_Dbp	ENSRNOG00000021027	24309	Dbp	1	101687855	101692846	0.258194	0.298222	0.790551	U	N	N	276.093	744.491	596.702	542.586	878.518	1047.88	707.376	1532	1100.78	395.687	465.088	1146.83
ENSRNOG00000021032_Sphk2	ENSRNOG00000021032	308589	Sphk2	1	101692973	101697277	-0.0244285	0.826148	0.96827	D	N	N	517.675	558.804	500.256	574.003	535.781	622.563	599.482	644.731	577.668	485.816	471.018	467.399
ENSRNOG00000021035_Rpl18	ENSRNOG00000021035	81766	Rpl18	1	101701975	101703550	-0.27295	0.197216	0.724511	D	N	N	9519.12	5528.76	7911.25	6230.82	4349.24	9706.23	5024.41	9557.56	4697.3	6420.02	4546.68	3853.72
ENSRNOG00000021039_Fam83e	ENSRNOG00000021039	292913	Fam83e	1	101704746	101711379	-0.0608016	0.813777	0.965281	D	N	N	32.4815	12.2048	10.8163	75.5715	131.696	14.3826	65.1194	42.7494	58.8366	7.69392	33.8862	42.5611
ENSRNOG00000021046_Sult2b1	ENSRNOG00000021046	292915	Sult2b1	1	101710959	101773508	-0.0486503	0.853252	0.974163	D	N	N	60.9029	16.5636	41.4626	100.196	185.683	55.4759	77.2495	116.034	86.6502	10.9913	76.2439	62.681
ENSRNOG00000021048_Lmtk3	ENSRNOG00000021048	NA	AC095693.1	1	101783621	101792496	0.0353996	0.883081	0.980914	U	N	N	6.09029	6.97415	0	31.4174	21.2677	2.05466	3.19213	26.1731	13.9068	5.49565	13.5545	13.1553
ENSRNOG00000021051_Cyth2	ENSRNOG00000021051	116692	Cyth2	1	101796349	101803200	0.138414	0.293018	0.785878	U	N	N	479.103	523.933	465.103	560.418	508.788	620.508	575.86	801.77	562.691	506.699	505.751	542.461
ENSRNOG00000021056_Kcnj14	ENSRNOG00000021056	276720	Kcnj14	1	101805531	101809544	-0.249484	0.329007	0.806439	D	N	N	36.5417	53.1779	30.6463	94.2521	117.79	63.6946	18.5144	76.7745	64.1853	31.8748	53.3707	57.2641
ENSRNOG00000021058_Grwd1	ENSRNOG00000021058	308592	Grwd1	1	101813684	101819478	0.116738	0.456553	0.865946	U	N	N	162.408	140.355	137.908	115.48	111.246	113.006	163.437	111.672	143.347	184.654	114.366	133.874
ENSRNOG00000021063_Grin2d	ENSRNOG00000021063	24412	Grin2d	1	101820461	101856881	0.0162417	0.946391	0.991185	U	N	N	26.3913	19.1789	21.6327	12.7368	24.5396	4.10933	18.5144	18.3212	13.9068	17.5861	17.7902	25.5367
ENSRNOG00000021082_Kdelr1	ENSRNOG00000021082	361577	Kdelr1	1	101859346	101870232	-0.195843	0.247378	0.75645	D	N	N	2994.39	1878.66	2538.24	1614.17	1612.25	2609.42	2069.78	2411.42	1642.07	1743.22	1579.94	1900.55
ENSRNOG00000021096_Tmem143	ENSRNOG00000021096	308593	Tmem143	1	101884019	101900070	0.150749	0.368263	0.824545	U	N	N	56.8427	47.9473	60.3912	39.0594	37.6274	49.3119	52.3509	48.8565	52.418	60.4522	50.8292	58.8118
ENSRNOG00000021104_Emp3	ENSRNOG00000021104	81505	Emp3	1	101900733	101903910	-0.315025	0.208832	0.732813	D	N	N	1386.56	385.322	764.355	408.426	509.606	283.544	546.493	317.567	235.346	641.892	573.523	354.418
ENSRNOG00000021118_Nomo1	ENSRNOG00000021118	361578	Nomo1	1	102017263	102068870	0.383335	0.00357623	0.155912	U	N	N	1102.34	824.694	1056.4	653.821	867.884	887.615	1218.76	992.834	1314.73	1314.56	1163.99	1154.57
ENSRNOG00000053946_AC120807.1	ENSRNOG00000053946	NA	AC120807.1	1	102086983	102091495	-0.110001	0.663702	0.932102	D	N	N	2.0301	11.333	3.60545	17.8315	4.90792	8.21865	1.27685	10.4693	9.6278	1.09913	11.8602	5.41687
ENSRNOG00000021128_Kcnj11	ENSRNOG00000021128	83535	Kcnj11	1	102103094	102106127	0.160783	0.416323	0.848135	U	N	N	18.2709	1.74354	3.60545	1.69824	44.9893	20.5466	0	7.85194	137.998	3.29739	6.77723	15.4768
ENSRNOG00000021130_Abcc8	ENSRNOG00000021130	25559	Abcc8	1	102110708	102191287	-0.128871	0.555188	0.903791	D	N	N	12.1806	0.871769	1.80272	5.94382	84.2527	20.5466	2.5537	13.0866	36.3717	2.19826	3.38862	27.0844
ENSRNOG00000011488_Sergef	ENSRNOG00000011488	365243	Sergef	1	102461329	102664951	-0.158939	0.408163	0.846305	D	N	N	229.401	115.074	182.976	115.48	131.696	186.974	138.538	170.125	118.743	185.753	110.977	112.207
ENSRNOG00000011672_Tph1	ENSRNOG00000011672	24848	Tph1	1	102669868	102699442	0.0191605	0.941254	0.990399	U	N	N	848.58	316.452	166.752	1529.26	1128	108.897	1481.79	202.406	451.437	296.765	837.835	958.787
ENSRNOG00000011895_LOC691143	ENSRNOG00000011895	691143	LOC691143	1	102716649	102741581	-0.0861816	0.564665	0.905491	D	N	N	351.207	197.02	187.483	258.981	231.49	269.161	206.85	267.838	215.021	229.718	233.815	234.473
ENSRNOG00000055531_Saa4	ENSRNOG00000055531	365245	Saa4	1	102776082	102849430	0.0381064	0.82453	0.967871	U	N	N	166.468	173.482	188.385	223.318	234.762	106.843	201.743	134.355	195.765	217.628	193.151	195.007
ENSRNOG00000012360_Gtf2h1	ENSRNOG00000012360	361580	Gtf2h1	1	102849889	102877944	0.0898977	0.593648	0.912929	U	N	N	217.22	377.476	269.507	409.275	397.542	470.518	321.767	361.189	341.252	433.058	435.437	407.813
ENSRNOG00000013009_Ldha	ENSRNOG00000013009	24533	Ldha	1	102900286	102909707	0.0833991	0.733777	0.946849	U	N	N	15199.3	6722.21	8424.13	10360.1	7318.53	17653.7	24997.6	5345.43	9375.34	12126.7	11279	8364.43
ENSRNOG00000013381_Tsg101	ENSRNOG00000013381	292925	Tsg101	1	102941231	102970950	0.0681089	0.650648	0.929502	U	N	N	740.985	646.853	686.838	681.841	728.008	647.219	1117.88	587.151	621.528	675.966	703.985	640.739
ENSRNOG00000013624_Uevld	ENSRNOG00000013624	691172	Uevld	1	102982123	103014388	0.0609073	0.814577	0.965493	U	N	N	36.5417	93.2793	52.279	185.108	139.876	61.6399	60.012	63.688	175.44	47.2626	146.558	123.04
ENSRNOG00000050806_Spty2d1	ENSRNOG00000050806	100365259	Spty2d1	1	103115216	103128743	0.242243	0.18934	0.715287	U	N	N	101.505	175.226	161.344	140.104	183.229	90.4052	195.358	120.396	190.417	153.878	213.483	174.888
ENSRNOG00000013663_Tmem86a	ENSRNOG00000013663	308602	Tmem86a	1	103172987	103177417	0.0858899	0.728149	0.945864	U	N	N	373.538	248.454	414.626	146.897	197.953	228.068	455.198	184.957	130.51	395.687	424.424	165.602
ENSRNOG00000013981_Ptpn5	ENSRNOG00000013981	29644	Ptpn5	1	103197915	103256823	0.388186	0.0230809	0.37168	U	N	N	2.0301	1.74354	5.40817	54.3435	8.99786	2.05466	366.456	1.74488	7.48829	5.49565	94.8813	2.32152
ENSRNOG00000014227_Mrgprx3	ENSRNOG00000014227	252960	Mrgprx3	1	103298174	103323476	0.232999	0.372482	0.826882	U	N	N	6.09029	8.71769	20.7313	4.24559	10.6338	10.2733	17.8759	8.72438	9.6278	17.5861	18.6374	9.28607
ENSRNOG00000028982_Mrgprb3	ENSRNOG00000028982	691194	Mrgprb3	1	103897041	103909926	-0.202738	0.396781	0.839476	D	N	N	2.0301	13.0765	3.60545	2.54735	35.9914	2.05466	5.10741	12.2141	5.34878	2.19826	1.69431	10.8337
ENSRNOG00000014277_Zdhhc13	ENSRNOG00000014277	365252	Zdhhc13	1	104106245	104145044	0.106628	0.552549	0.903791	U	N	N	334.966	181.328	228.946	241.999	280.57	213.685	240.687	173.615	240.695	361.614	319.377	274.713
ENSRNOG00000022537_E2f8	ENSRNOG00000022537	308607	E2f8	1	104187100	104202591	0.163508	0.523919	0.894396	U	N	N	44.6621	29.6402	14.4218	33.1156	29.4475	67.8039	10.8532	47.9841	39.581	57.1548	44.8992	59.5856
ENSRNOG00000014530_Nav2	ENSRNOG00000014530	171563	Nav2	1	104576589	104941552	-0.102727	0.655278	0.931272	D	N	N	891.212	1500.31	1288.95	2067.6	1920.63	1080.75	1281.96	748.552	1756.54	689.155	2167.02	1310.88
ENSRNOG00000022189_Htatip2	ENSRNOG00000022189	292935	Htatip2	1	105094411	105109461	-0.0740669	0.70115	0.943012	D	N	N	343.086	202.25	228.946	221.62	278.934	314.364	379.225	230.324	223.579	211.033	288.88	153.22
ENSRNOG00000014829_Prmt3	ENSRNOG00000014829	89820	Prmt3	1	105113595	105200470	-0.0693219	0.685414	0.940229	D	N	N	345.116	221.429	294.745	227.564	260.12	260.942	279.631	187.574	200.044	358.317	284.644	209.71
ENSRNOG00000015675_Nell1	ENSRNOG00000015675	81733	Nell1	1	105349069	106218958	0.105928	0.677897	0.937319	U	N	N	671.962	191.789	902.263	422.861	368.912	108.897	784.625	7.85194	608.691	664.974	780.229	391.563
ENSRNOG00000023968_Fancf	ENSRNOG00000023968	499155	Fancf	1	107231292	107232305	0.159314	0.417157	0.848262	U	N	N	46.6922	41.8449	45.9695	45.8523	26.1756	22.6013	39.5824	48.8565	54.5575	46.1635	38.1219	37.9181
ENSRNOG00000016717_Gas2	ENSRNOG00000016717	499156	Gas2	1	107262659	107363788	-0.507025	0.0513711	0.498728	D	N	N	8.12039	16.5636	18.0272	19.5297	8.99786	8.21865	3.19213	6.10706	8.55805	6.59479	10.1658	10.8337
ENSRNOG00000037137_Svip	ENSRNOG00000037137	499157	Svip	1	107368117	107373807	-0.00581832	0.978779	0.996578	D	N	N	22.3311	38.3578	37.8572	32.2665	57.2591	41.0933	33.8366	50.6014	55.6273	30.7757	27.1089	34.0489
ENSRNOG00000011480_Tubgcp5	ENSRNOG00000011480	308663	Tubgcp5	1	114186853	114222516	-0.0401146	0.834489	0.970469	D	N	N	125.866	241.48	165.851	269.17	238.852	127.389	164.075	154.421	227.858	173.663	232.12	189.591
ENSRNOG00000011945_Cyfip1	ENSRNOG00000011945	308666	Cyfip1	1	114258719	114347137	0.0257465	0.840899	0.972097	U	N	N	1723.55	1489.85	1579.19	1390.01	1547.63	1364.3	1926.77	1086.18	1521.19	1665.18	1586.72	1480.35
ENSRNOG00000012690_Nipa2	ENSRNOG00000012690	308667	Nipa2	1	114348038	114371897	-0.183199	0.343542	0.810889	D	N	N	665.872	463.781	530.001	399.085	412.265	396.55	667.794	308.843	281.346	437.454	413.411	350.549
ENSRNOG00000042702_Nipa1	ENSRNOG00000042702	308668	Nipa1	1	114386757	114422733	0.204576	0.413881	0.847679	U	N	N	77.1437	52.3062	72.109	28.0209	51.5332	41.0933	152.584	43.6219	48.139	43.9652	55.9122	52.6211
ENSRNOG00000013718_Herc2	ENSRNOG00000013718	308669	Herc2	1	114453054	114653793	-0.0249071	0.901118	0.983317	D	N	N	580.608	754.952	634.559	1219.33	1282.6	585.579	882.305	684.864	984.175	622.108	947.965	839.615
ENSRNOG00000056228_Atp10a	ENSRNOG00000056228	365266	Atp10a	1	115975324	116141892	0.131324	0.587179	0.911336	U	N	N	111.655	57.5368	91.0376	77.2697	120.244	43.1479	87.4644	61.0706	41.7205	160.473	119.449	102.147
ENSRNOG00000033844_LOC100912195	ENSRNOG00000033844	501625	LOC100912195	1	116565790	116567189	-0.498426	0.0370261	0.446292	D	N	N	235.491	437.628	229.847	210.581	193.045	145.881	105.979	304.481	110.185	152.779	99.9642	120.719
ENSRNOG00000015734_Ube3a	ENSRNOG00000015734	361585	Ube3a	1	116587815	116679973	-0.20608	0.312655	0.798409	D	N	N	158.348	388.809	255.987	354.931	371.366	223.958	282.184	160.529	278.136	204.438	232.12	321.143
ENSRNOG00000010146_Ndn	ENSRNOG00000010146	308690	Ndn	1	122981755	122983351	-0.257097	0.327459	0.805682	D	N	N	62.933	39.2296	124.388	6.79294	22.0856	32.8746	44.6898	51.4738	16.0463	23.0817	31.3447	30.9536
ENSRNOG00000010172_Mkrn3	ENSRNOG00000010172	292988	Mkrn3	1	123062863	123064642	0.0529555	0.822209	0.966889	U	N	N	34.5116	24.4095	15.3232	40.7576	25.3576	20.5466	19.7912	27.0456	40.6507	16.487	32.1919	33.2751
ENSRNOG00000024429_Peg12	ENSRNOG00000024429	308692	Peg12	1	123097861	123100464	0.00277046	0.990573	0.99829	U	N	N	71.0534	28.7684	39.6599	41.6068	40.0814	67.8039	28.0907	83.754	41.7205	52.7583	40.6634	37.1443
ENSRNOG00000029078_Hmgn5b	ENSRNOG00000029078	681284	Hmgn5b	1	124477164	124485724	-0.17464	0.363901	0.822561	D	N	N	186.769	196.148	127.993	182.56	183.229	347.238	175.567	184.084	155.115	152.779	151.641	231.378
ENSRNOG00000015822_Klf13	ENSRNOG00000015822	499171	Klf13	1	124772596	124803363	0.426361	0.084209	0.570203	U	N	N	12.1806	24.4095	14.4218	16.1332	12.2698	6.16399	29.3676	13.0866	19.2556	17.5861	30.4975	26.3105
ENSRNOG00000016090_Mtmr10	ENSRNOG00000016090	309255	Mtmr10	1	125124743	125175857	-0.178057	0.36202	0.822561	D	N	N	286.244	455.935	530.902	380.405	316.561	573.251	381.779	326.292	471.762	246.205	280.408	485.971
ENSRNOG00000023985_Fan1	ENSRNOG00000023985	309256	Fan1	1	125181838	125209727	0.141641	0.537332	0.900376	U	N	N	32.4815	79.331	43.2654	99.3468	107.156	59.5852	72.1421	53.2187	106.976	69.2452	88.9512	96.7299
ENSRNOG00000016266_Mphosph10	ENSRNOG00000016266	293828	Mphosph10	1	125212849	125229052	-0.00915838	0.96103	0.993788	D	N	N	150.227	261.531	173.061	378.706	315.743	283.544	245.794	231.196	243.904	297.864	287.185	251.498
ENSRNOG00000016327_Mcee	ENSRNOG00000016327	293829	Mcee	1	125229469	125252666	-0.40921	0.118434	0.627221	D	N	N	196.919	172.61	369.558	230.96	137.422	1290.33	168.544	257.369	333.764	154.977	115.213	331.977
ENSRNOG00000016358_Apba2	ENSRNOG00000016358	83610	Apba2	1	125367280	125548890	0.242443	0.332694	0.807045	U	N	N	12.1806	12.2048	37.8572	47.5506	4.90792	63.6946	49.1588	17.4488	147.626	9.89218	15.2488	46.4303
ENSRNOG00000011077_Tjp1	ENSRNOG00000011077	292994	Tjp1	1	126146489	126227469	-0.0755504	0.601527	0.916107	D	N	N	927.754	1473.29	1262.81	1365.38	1296.51	1025.28	1352.19	1087.93	1223.8	859.52	1068.26	1361.18
ENSRNOG00000024460_Tarsl2	ENSRNOG00000024460	308701	Tarsl2	1	126523169	126559489	0.479474	0.0158976	0.310381	U	N	N	18.2709	21.7942	18.9286	25.4735	16.3597	26.7106	30.6444	25.3007	36.3717	34.0731	32.1919	30.9536
ENSRNOG00000011290_Tm2d3	ENSRNOG00000011290	292995	Tm2d3	1	126586543	126595603	0.21755	0.382107	0.834061	U	N	N	22.3311	13.9483	10.8163	6.79294	13.0878	8.21865	17.2375	21.8109	11.7673	12.0904	18.6374	10.0599
ENSRNOG00000011526_Pcsk6	ENSRNOG00000011526	25507	Pcsk6	1	126749508	126947392	0.112889	NA	NA	U	NA	NA	83.234	102.869	391.191	65.3821	48.2612	47.2573	272.608	123.014	126.231	101.12	136.392	102.147
ENSRNOG00000011932_Snrpa1	ENSRNOG00000011932	100361269	Snrpa1	1	126961389	126974453	-0.150263	0.486995	0.877677	D	N	N	339.026	210.096	227.143	210.581	219.221	484.901	174.29	267.838	197.905	397.885	223.649	212.032
ENSRNOG00000012576_Selenos	ENSRNOG00000012576	286900	Selenos	1	126979575	126989344	-0.0993568	0.40811	0.846305	D	N	N	708.504	594.547	737.314	611.365	541.507	819.811	678.647	653.456	544.506	669.371	623.505	547.104
ENSRNOG00000012698_Chsy1	ENSRNOG00000012698	292999	Chsy1	1	127010588	127071570	-0.293209	0.101264	0.603098	D	N	N	1386.56	748.85	1236.67	854.212	963.589	1111.57	1040.63	616.813	683.574	716.633	1136.03	782.351
ENSRNOG00000012730_Lrrk1	ENSRNOG00000012730	308703	Lrrk1	1	127166431	127292090	0.139803	0.496577	0.884599	U	N	N	462.862	358.297	504.763	534.095	597.949	390.386	580.968	225.961	634.365	614.414	703.138	454.244
ENSRNOG00000052070_Aldh1a3	ENSRNOG00000052070	266603	Aldh1a3	1	127301128	127337882	-0.120666	0.623539	0.921435	D	N	N	2166.11	2676.33	2233.57	4252.38	3798.73	959.528	1982.31	1141.15	2731.09	2567.57	4156.14	1646.73
ENSRNOG00000013795_Asb7	ENSRNOG00000013795	365277	Asb7	1	127554785	127599257	-0.217683	0.0762193	0.555301	D	N	N	253.762	232.762	230.749	191.051	230.672	189.029	213.234	210.257	175.44	173.663	155.029	201.198
ENSRNOG00000042776_Lins1	ENSRNOG00000042776	308704	Lins1	1	127604197	127625577	-0.0776124	0.665101	0.932336	D	N	N	79.1738	43.5885	49.5749	50.9471	71.1649	73.9679	45.3282	62.8155	56.6971	56.0557	65.2309	53.3949
ENSRNOG00000037080_Adamts17	ENSRNOG00000037080	293004	Adamts17	1	127802978	128124171	0.0494423	0.847514	0.973121	U	N	N	12.1806	29.6402	19.83	15.2841	8.99786	67.8039	8.93796	34.0251	20.3254	25.28	5.08292	71.1932
ENSRNOG00000050624_Lysmd4	ENSRNOG00000050624	681647	Lysmd4	1	128199322	128203268	0.0193242	0.924941	0.989268	U	N	N	46.6922	44.4602	32.449	29.7191	36.8094	45.2026	31.2829	39.2597	60.9761	28.5774	32.1919	44.1088
ENSRNOG00000047756_Mef2a	ENSRNOG00000047756	309957	Mef2a	1	128209971	128341263	0.0930444	0.519042	0.892355	U	N	N	324.815	302.504	360.545	226.714	272.39	283.544	383.694	235.558	336.973	281.378	325.307	331.977
ENSRNOG00000023274_Lrrc28	ENSRNOG00000023274	361588	Lrrc28	1	128486166	128604188	-0.105574	0.501072	0.884801	D	N	N	140.077	98.5099	95.5444	78.1188	109.61	100.679	85.5491	102.075	83.4409	122.004	88.9512	86.67
ENSRNOG00000013877_Ttc23	ENSRNOG00000013877	308708	Ttc23	1	128606770	128687893	-0.0584567	0.741141	0.947826	D	N	N	107.595	120.304	112.67	145.199	134.968	96.5692	133.431	166.636	114.464	81.3357	98.2699	94.4084
ENSRNOG00000014030_Synm	ENSRNOG00000014030	308709	Synm	1	128692112	128722048	0.209385	0.421135	0.849862	U	N	N	525.795	252.813	629.151	496.734	1622.07	700.64	616.081	415.28	2202.63	850.727	624.353	744.433
ENSRNOG00000014187_Igf1r	ENSRNOG00000014187	25718	Igf1r	1	128924966	129206516	0.286534	0.13417	0.652981	U	N	N	125.866	153.431	155.034	154.539	161.143	88.3505	162.16	108.182	243.904	145.085	223.649	187.269
ENSRNOG00000022822_Fam169b	ENSRNOG00000022822	680906	Fam169b	1	129255396	129334292	0.0813685	0.750148	0.948413	U	N	N	22.3311	67.998	86.5307	38.2103	30.2655	22.6013	72.7806	67.1777	32.0927	50.56	49.9821	24.7628
ENSRNOG00000010775_Arrdc4	ENSRNOG00000010775	293019	Arrdc4	1	129766100	129780356	-0.0856273	0.68405	0.940229	D	N	N	306.545	452.448	461.497	489.092	296.929	661.602	277.715	239.92	421.484	526.484	465.088	545.557
ENSRNOG00000059662_AABR07004228.1	ENSRNOG00000059662	NA	AABR07004228.1	1	131380879	131431948	-0.297665	0.235572	0.750348	D	N	N	16.2408	29.6402	34.2518	21.2279	34.3555	18.492	25.537	8.72438	8.55805	24.1809	28.8032	18.5721
ENSRNOG00000010308_Nr2f2	ENSRNOG00000010308	113984	Nr2f2	1	131448447	131460473	-0.123806	0.562014	0.904874	D	N	N	172.558	182.2	206.412	159.634	116.972	80.1319	154.499	201.533	118.743	89.0296	100.811	160.959
ENSRNOG00000048904_AABR07004232.1	ENSRNOG00000048904	NA	AABR07004232.1	1	131584306	131585731	-0.490571	0.0599242	0.522575	D	N	N	16.2408	15.6918	8.11226	41.6068	30.2655	20.5466	0.638426	7.85194	14.9766	10.9913	12.7073	16.2506
ENSRNOG00000009932_Mctp2	ENSRNOG00000009932	308742	Mctp2	1	133324301	133559975	-0.0887941	0.708242	0.944228	D	N	N	66.9932	177.841	138.81	241.999	193.045	76.0226	131.516	88.9886	174.37	94.5253	184.68	153.994
ENSRNOG00000012874_Rgma	ENSRNOG00000012874	308739	Rgma	1	134699299	134742514	-0.236638	0.303334	0.793766	D	N	N	609.029	1070.53	1035.66	487.393	453.165	973.911	445.621	720.634	668.597	567.152	320.224	989.74
ENSRNOG00000012716_Chd2	ENSRNOG00000012716	308738	Chd2	1	134757934	134871167	0.0406288	0.861498	0.976225	U	N	N	286.244	720.953	467.807	1164.14	920.235	540.377	524.148	670.905	958.501	455.04	809.879	848.901
ENSRNOG00000051039_LOC108349594	ENSRNOG00000051039	NA	LOC108349594	1	134873400	134887841	-0.454911	0.0505662	0.497192	D	N	N	83.234	146.457	111.769	235.206	183.229	127.389	137.9	54.9636	101.627	52.7583	104.2	127.683
ENSRNOG00000051102_Rn50_1_1361.1	ENSRNOG00000051102	NA	AABR07004269.3	1	134992510	135000438	0.424262	0.085172	0.570512	U	N	N	6.09029	14.8201	7.2109	14.435	13.9058	14.3826	24.8986	9.59682	18.1858	21.9826	16.0959	20.1198
ENSRNOG00000012369_Fam174b	ENSRNOG00000012369	681398	Fam174b	1	135083974	135162685	0.0972564	0.712038	0.945355	U	N	N	34.5116	11.333	21.6327	16.1332	78.5268	16.4373	51.0741	44.4943	37.4414	10.9913	24.5675	35.5966
ENSRNOG00000032798_Slco3a1	ENSRNOG00000032798	140915	Slco3a1	1	135790810	136073540	-0.189824	0.33419	0.807045	D	N	N	280.153	351.323	381.276	213.129	175.049	254.778	208.765	306.226	167.952	314.351	199.928	217.449
ENSRNOG00000011160_Sv2b	ENSRNOG00000011160	117556	AC126641.1	1	136664204	136842247	0.0194607	0.932784	0.989544	U	N	N	2.0301	16.5636	12.6191	1.69824	6.5439	0	7.02269	6.10706	5.34878	0	3.38862	20.8937
ENSRNOG00000010964_Akap13	ENSRNOG00000010964	293024	Akap13	1	137014272	137315272	0.280772	0.193219	0.718778	U	N	N	507.524	793.31	709.372	979.033	1113.28	480.791	787.179	487.693	1083.66	1149.69	1296.99	1076.41
ENSRNOG00000010959_Klhl25	ENSRNOG00000010959	293023	Klhl25	1	137333881	137359072	0.379675	0.0384466	0.45345	U	N	N	184.739	162.149	156.837	178.315	213.495	201.357	413.7	234.686	244.974	191.249	211.789	188.817
ENSRNOG00000018674_Ntrk3	ENSRNOG00000018674	29613	Ntrk3	1	139890560	140262503	-0.178216	0.490831	0.880776	D	N	N	20.301	47.9473	18.9286	39.0594	22.0856	98.6239	15.9606	58.4533	58.8366	3.29739	11.8602	34.0489
ENSRNOG00000018547_Mrpl46	ENSRNOG00000018547	293054	Mrpl46	1	140469280	140477796	-0.077128	0.637428	0.92551	D	N	N	213.16	166.508	138.81	171.522	134.15	252.724	162.16	197.171	149.766	194.546	146.558	151.672
ENSRNOG00000018531_Mrps11	ENSRNOG00000018531	499185	Mrps11	1	140477868	140487248	-0.0322054	0.8674	0.977533	D	N	N	255.792	176.097	178.47	176.616	176.685	322.582	208.127	309.715	180.789	215.43	143.169	184.948
ENSRNOG00000018515_Det1	ENSRNOG00000018515	308775	Det1	1	140519702	140535934	0.0218422	0.860447	0.975839	U	N	N	111.655	140.355	127.993	108.687	135.786	102.733	120.024	139.59	134.789	120.904	118.602	115.302
ENSRNOG00000018421_Aen	ENSRNOG00000018421	361594	Aen	1	140584380	140593745	0.168821	0.330918	0.807045	U	N	N	133.986	238.865	188.385	240.3	238.034	215.74	317.936	166.636	220.37	286.873	233.815	215.901
ENSRNOG00000054561_Isg20	ENSRNOG00000054561	293052	Isg20	1	140601791	140608946	0.237775	0.316714	0.801599	U	N	N	158.348	138.611	53.1804	159.634	214.313	168.482	302.614	162.273	119.813	254.998	149.946	132.326
ENSRNOG00000022321_Hapln3	ENSRNOG00000022321	308773	Hapln3	1	140827295	140835151	-0.124937	0.573978	0.908577	D	N	N	40.6019	20.9225	29.7449	28.0209	27.8116	14.3826	19.7912	33.1526	25.6741	28.5774	16.0959	21.6675
ENSRNOG00000017510_Mfge8	ENSRNOG00000017510	25277	Mfge8	1	140845465	140860894	-0.0678595	0.785995	0.957615	D	N	N	12217.1	14841	16225.4	9118.67	4261.71	25814.8	12428.2	9271.4	17561.1	7512.56	9029.81	20964.1
ENSRNOG00000017120_Abhd2	ENSRNOG00000017120	293050	Abhd2	1	140998240	141087405	0.638584	0.0142612	0.294212	U	N	N	412.11	258.044	558.844	120.575	377.092	152.045	2396.65	216.365	671.807	367.11	654.85	389.241
ENSRNOG00000016689_Fanci	ENSRNOG00000016689	NA	Fanci	1	141120166	141172483	0.0778236	0.738602	0.947372	U	N	N	146.167	94.1511	57.6872	80.6662	102.248	145.881	50.4356	107.31	85.5805	114.31	132.156	178.757
ENSRNOG00000032293_Polg	ENSRNOG00000032293	85472	Polg	1	141172531	141188031	0.419731	0.00092932	0.0711276	U	Y	N	387.748	401.014	327.194	287.851	366.458	376.003	453.921	403.939	526.32	453.941	469.323	611.333
ENSRNOG00000031802_LOC691427	ENSRNOG00000031802	NA	LOC691427	1	141218095	141218277	-0.32266	0.173447	0.700648	D	N	N	125.866	40.9732	69.4049	60.2873	50.7152	123.28	44.0514	84.6265	58.8366	67.047	46.5935	37.1443
ENSRNOG00000015520_Ticrr	ENSRNOG00000015520	308768	Ticrr	1	141391262	141433109	0.287098	0.25531	0.762639	U	N	N	66.9932	61.8956	30.6463	53.4944	40.8994	82.1865	22.3449	67.1777	50.2785	100.021	77.091	138.517
ENSRNOG00000026857_Kif7	ENSRNOG00000026857	293047	Kif7	1	141434625	141451075	0.00482834	0.983739	0.998133	U	N	N	77.1437	96.7664	48.6735	152.841	128.424	117.116	57.4583	123.014	118.743	60.4522	105.047	160.185
ENSRNOG00000015086_Plin1	ENSRNOG00000015086	25629	Plin1	1	141458181	141471010	0.265283	0.247357	0.75645	U	N	N	48.7223	236.249	123.487	0.849118	4.90792	36.9839	218.98	106.437	103.766	124.202	15.2488	340.489
ENSRNOG00000015003_Pex11a	ENSRNOG00000015003	85249	Pex11a	1	141474180	141481315	-0.0654803	0.791301	0.959033	D	N	N	48.7223	85.4334	46.8708	110.385	99.7944	213.685	74.0574	131.738	109.115	57.1548	72.8552	116.85
ENSRNOG00000014610_Anpep	ENSRNOG00000014610	81641	Anpep	1	141561334	141604273	0.223555	0.364736	0.822632	U	N	N	328.876	645.109	624.644	128.217	307.563	281.489	628.211	608.962	266.369	499.005	332.084	581.927
ENSRNOG00000043141_Ap3s2	ENSRNOG00000043141	683402	Ap3s2	1	141612963	141655894	0.0218831	0.90026	0.983317	U	N	N	497.374	312.093	396.599	323.514	325.559	441.753	416.254	567.957	302.741	416.571	305.823	318.048
ENSRNOG00000014589_Arpin	ENSRNOG00000014589	308765	Arpin	1	141662850	141672810	-0.193798	0.162266	0.686921	D	N	N	255.792	205.738	191.99	254.735	260.938	281.489	174.29	232.068	233.207	163.771	227.037	218.223
ENSRNOG00000060197_AABR07004404.1	ENSRNOG00000060197	NA	AABR07004404.1	1	141675044	141679522	-0.257501	0.304983	0.794228	D	N	N	14.2107	13.0765	8.11226	19.5297	16.3597	12.328	7.66111	17.4488	13.9068	7.69392	7.62439	10.0599
ENSRNOG00000014278_Zfp710	ENSRNOG00000014278	293044	Zfp710	1	141767940	141870325	0.352695	0.0931056	0.584681	U	N	N	109.625	98.5099	87.4321	70.4768	112.882	45.2026	111.086	62.8155	132.65	143.986	117.754	147.029
ENSRNOG00000047565_Echs1	ENSRNOG00000047565	100911186	LOC100911186	1	141821916	141830764	0.262838	0.100611	0.602702	U	N	N	710.534	825.566	728.3	787.981	568.501	719.132	767.388	1160.34	756.317	1159.58	624.353	851.997
ENSRNOG00000047000_Fuom	ENSRNOG00000047000	100911225	Fuom	1	141832774	141836250	-0.318865	0.0841914	0.570203	D	N	N	223.311	124.663	187.483	165.578	123.516	199.302	118.747	190.191	115.534	146.184	107.589	106.79
ENSRNOG00000013949_Idh2	ENSRNOG00000013949	361596	Idh2	1	141866283	141893705	0.0868535	0.59281	0.912929	U	N	N	1055.65	947.613	776.073	728.543	727.19	1029.39	653.11	1158.6	881.479	1225.53	815.809	889.915
ENSRNOG00000025167_Sema4b	ENSRNOG00000025167	293042	Sema4b	1	141986145	142014398	0.364244	0.064087	0.53208	U	N	N	156.317	349.579	199.201	289.549	206.951	334.91	260.478	436.219	411.856	313.252	260.076	401.622
ENSRNOG00000033498_Cib1	ENSRNOG00000033498	81823	Cib1	1	142014958	142020525	-0.121632	0.528409	0.896037	D	N	N	838.43	572.752	626.447	552.776	543.143	928.708	622.465	862.841	415.065	781.482	560.816	423.29
ENSRNOG00000025003_AC114460.1	ENSRNOG00000025003	NA	AC114460.1	1	142027250	142028043	-0.193111	0.446583	0.862269	D	N	N	22.3311	8.71769	15.3232	16.1332	7.36188	12.328	10.8532	18.3212	9.6278	6.59479	10.1658	8.51223
ENSRNOG00000056362_Ttll13	ENSRNOG00000056362	308762	Ttll13	1	142034423	142050071	-0.160996	0.541638	0.901502	D	N	N	16.2408	17.4354	7.2109	38.2103	26.9936	6.16399	10.8532	14.8314	26.7439	3.29739	22.8732	12.3814
ENSRNOG00000013553_Ngrn	ENSRNOG00000013553	499191	Ngrn	1	142050458	142056336	-0.104859	0.509465	0.888315	D	N	N	160.378	237.121	193.793	295.493	323.105	265.052	234.302	233.813	265.299	205.537	218.566	209.71
ENSRNOG00000013149_Vps33b	ENSRNOG00000013149	64060	Vps33b	1	142060955	142083953	0.06005	0.680259	0.938276	U	N	N	131.956	169.995	171.259	244.546	219.221	160.264	174.29	180.595	209.672	193.447	206.706	197.329
ENSRNOG00000013057_Prc1	ENSRNOG00000013057	308761	Prc1	1	142087208	142108746	0.00267733	0.99155	0.99829	U	N	N	580.608	323.426	147.823	280.209	305.927	692.422	132.793	569.702	323.066	345.127	391.385	568.772
ENSRNOG00000042059_Rccd1	ENSRNOG00000042059	308760	Rccd1	1	142109252	142114634	-0.178819	0.48052	0.874038	D	N	N	22.3311	8.71769	7.2109	12.7368	10.6338	8.21865	7.02269	11.3417	11.7673	12.0904	7.62439	6.19071
ENSRNOG00000012357_Unc45a	ENSRNOG00000012357	308759	Unc45a	1	142118917	142133627	0.110653	0.442319	0.861818	U	N	N	661.811	699.159	623.742	804.114	910.42	869.123	798.032	1135.91	773.433	834.24	758.203	667.049
ENSRNOG00000012236_Hddc3	ENSRNOG00000012236	308758	Hddc3	1	142136452	142138737	-0.129318	0.54916	0.902709	D	N	N	196.919	156.918	195.596	168.974	148.874	324.637	116.194	307.971	182.928	147.284	134.697	168.697
ENSRNOG00000012055_Man2a2	ENSRNOG00000012055	308757	Man2a2	1	142143799	142164263	0.365716	0.0110417	0.258339	U	N	N	324.815	353.067	361.446	278.511	340.283	386.277	383.056	553.126	562.691	347.325	385.455	459.66
ENSRNOG00000011683_Fes	ENSRNOG00000011683	361597	Fes	1	142174648	142183884	-0.00384503	0.985215	0.998133	D	N	N	154.287	101.997	106.361	213.978	174.231	162.318	151.945	90.7335	130.51	200.042	207.553	129.231
ENSRNOG00000011352_Furin	ENSRNOG00000011352	54281	Furin	1	142185094	142197182	0.221641	0.382464	0.83413	U	N	N	1412.95	1541.29	1205.12	2847.09	4786.04	1775.23	6163.36	2163.65	2717.18	1410.18	2738.85	2115.68
ENSRNOG00000011213_Blm	ENSRNOG00000011213	308755	Blm	1	142246790	142332588	0.098119	0.604056	0.917041	U	N	N	109.625	135.996	83.8267	128.217	190.591	121.225	157.053	132.611	91.999	176.96	132.156	146.256
ENSRNOG00000011975_Crtc3	ENSRNOG00000011975	365297	Crtc3	1	142393207	142500383	0.158598	0.394042	0.838238	U	N	N	71.0534	102.869	81.1226	61.1365	79.3447	41.0933	79.1648	85.4989	71.6736	68.1461	105.894	92.8607
ENSRNOG00000012002_Iqgap1	ENSRNOG00000012002	361598	Iqgap1	1	142525046	142615673	0.37331	0.0544977	0.510525	U	N	N	1867.69	2562.13	2029.87	1611.63	2258.46	1469.08	2809.71	1225.78	2865.88	2921.49	3275.1	2979.28
ENSRNOG00000022164_Zscan2	ENSRNOG00000022164	683603	Zscan2	1	142679345	142695475	0.0177543	0.935715	0.98964	U	N	N	26.3913	36.6143	36.0545	60.2873	53.1692	32.8746	37.0287	66.3053	41.7205	28.5774	35.5805	44.8827
ENSRNOG00000010664_Wdr73	ENSRNOG00000010664	308751	Wdr73	1	142711789	142720257	0.0851023	0.513535	0.889215	U	N	N	113.685	101.997	120.782	95.9503	116.972	129.444	131.516	137.845	115.534	97.8227	116.06	116.076
ENSRNOG00000011029_Sec11a	ENSRNOG00000011029	65166	Sec11a	1	142733434	142759882	-0.261054	0.105094	0.607202	D	N	N	1705.28	1119.35	1479.13	965.447	957.863	1419.77	1091.07	1217.92	851.526	1220.04	968.297	889.141
ENSRNOG00000060206_Zfp592	ENSRNOG00000060206	293038	Zfp592	1	142834157	142870995	0.143286	0.33688	0.807222	U	N	N	334.966	456.807	326.293	453.429	488.338	316.418	383.056	445.816	560.552	364.911	465.935	442.636
ENSRNOG00000011659_Alpk3	ENSRNOG00000011659	365298	Alpk3	1	142883040	142931940	0.392271	NA	NA	U	NA	NA	46.6922	7.84592	5.40817	12.7368	12.2698	12.328	7.66111	1.74488	333.764	12.0904	16.9431	5.41687
ENSRNOG00000019005_Pde8a	ENSRNOG00000019005	308776	Pde8a	1	143036218	143159433	0.0780491	0.689824	0.94094	U	N	N	85.2641	84.5616	100.953	70.4768	52.3512	82.1865	105.979	95.0957	60.9761	52.7583	88.9512	99.0514
ENSRNOG00000019106_Rps17	ENSRNOG00000019106	29286	Rps17	1	143167362	143169657	-0.355639	0.0964177	0.593779	D	N	N	9884.54	6249.71	9127.19	6125.53	3692.39	9445.29	4894.81	8353.59	4483.35	6636.55	4411.13	3817.35
ENSRNOG00000019161_Cpeb1	ENSRNOG00000019161	293056	Cpeb1	1	143171264	143278485	0.0976368	0.689628	0.94094	U	N	N	16.2408	33.999	28.8436	16.9824	26.9936	6.16399	35.1134	21.8109	22.4649	19.7844	28.8032	19.346
ENSRNOG00000028113_Whamm	ENSRNOG00000028113	293057	Whamm	1	143401986	143430356	0.271695	0.15908	0.684305	U	N	N	56.8427	115.945	87.4321	148.596	116.972	121.225	108.532	133.483	126.231	184.654	153.335	111.433
ENSRNOG00000061450_Homer2	ENSRNOG00000061450	29547	Homer2	1	143443300	143535583	0.426583	0.101169	0.603098	U	N	N	117.746	40.9732	32.449	43.305	144.784	100.679	210.042	210.257	106.976	40.6678	88.9512	149.351
ENSRNOG00000019426_Fam103a1	ENSRNOG00000019426	293058	Rammet	1	143583675	143589556	-0.256438	0.118522	0.627221	D	N	N	211.13	128.15	154.133	172.371	125.97	193.138	126.408	166.636	105.906	154.977	133.003	111.433
ENSRNOG00000052273_RGD1305713	ENSRNOG00000052273	293059	LOC100363116	1	143601014	143607170	0.0632912	0.565552	0.905631	U	N	N	168.498	168.251	160.442	208.034	192.227	197.248	203.658	186.702	181.858	215.43	182.985	176.435
ENSRNOG00000019529_Btbd1	ENSRNOG00000019529	293060	Btbd1	1	143609731	143647124	-0.189427	0.149484	0.674576	D	N	N	893.242	840.386	1184.39	832.135	820.441	852.685	961.469	885.524	753.108	633.099	717.539	759.136
ENSRNOG00000019662_Tm6sf1	ENSRNOG00000019662	361600	Tm6sf1	1	143661521	143703759	-0.204716	0.392061	0.837676	D	N	N	274.063	151.688	257.79	129.066	109.61	104.788	171.737	106.437	82.3712	245.106	134.697	99.0514
ENSRNOG00000019740_Hdgfrp3	ENSRNOG00000019740	252941	Hdgfl3	1	143702853	143751789	-0.0154183	0.93143	0.989541	D	N	N	131.956	163.021	201.004	181.711	132.514	139.717	236.856	127.376	131.58	162.671	161.806	120.719
ENSRNOG00000019770_Bnc1	ENSRNOG00000019770	365299	Bnc1	1	143793064	143818706	0.10887	0.657926	0.931445	U	N	N	4.06019	39.2296	26.1395	62.8347	6.5439	49.3119	70.8653	21.8109	13.9068	4.39652	113.519	13.1553
ENSRNOG00000019776_Sh3gl3	ENSRNOG00000019776	81921	Sh3gl3	1	144069638	144200397	0.10606	0.685456	0.940229	U	N	N	30.4514	11.333	27.0409	22.0771	13.0878	30.82	17.8759	70.6675	14.9766	24.1809	13.5545	11.6076
ENSRNOG00000010840_Adamtsl3	ENSRNOG00000010840	308787	Adamtsl3	1	144239020	144561247	0.543774	0.0390254	0.456906	U	N	N	12.1806	12.2048	31.5477	6.79294	6.5439	4.10933	45.9667	17.4488	31.0229	17.5861	33.039	12.3814
ENSRNOG00000032723_Efl1	ENSRNOG00000032723	308789	Efl1	1	144601410	144740735	0.249526	0.0351155	0.437091	U	N	N	180.679	245.839	211.82	235.206	242.942	244.505	313.467	232.941	240.695	291.27	299.045	261.558
ENSRNOG00000025142_Mex3b	ENSRNOG00000025142	308790	Mex3b	1	144831523	144835747	-0.478149	0.0258964	0.390634	D	N	N	436.471	160.406	222.636	206.336	161.143	199.302	141.731	165.763	115.534	161.572	111.824	208.163
ENSRNOG00000025052_Stard5	ENSRNOG00000025052	502348	Stard5	1	145770135	145780001	0.0374012	0.855262	0.974608	U	N	N	395.869	297.273	261.395	241.999	187.319	291.762	448.175	184.084	248.183	347.325	200.776	294.059
ENSRNOG00000011680_Il16	ENSRNOG00000011680	116996	Il16	1	145781928	145870912	0.160412	0.522377	0.893661	U	N	N	215.19	333.888	347.926	223.318	376.274	90.4052	348.581	208.513	121.952	490.212	476.101	242.212
ENSRNOG00000012349_Mesdc1	ENSRNOG00000012349	308795	Tlnrd1	1	146027822	146029840	0.131859	0.534842	0.899319	U	N	N	456.772	322.555	441.667	501.828	396.724	244.505	741.212	378.638	270.648	493.51	473.559	295.607
ENSRNOG00000012366_Mesdc2	ENSRNOG00000012366	308796	Mesd	1	146037426	146043097	0.0862863	0.435734	0.859213	U	N	N	933.844	925.819	1078.93	884.781	1013.49	992.403	1312.6	918.677	928.548	1123.31	984.393	937.119
ENSRNOG00000012442_Cemip	ENSRNOG00000012442	308797	Cemip	1	146069771	146226462	0.315303	0.228896	0.744744	U	N	N	28.4214	19.1789	24.3368	12.7368	53.1692	20.5466	35.1134	5.23463	103.766	50.56	29.6504	29.4059
ENSRNOG00000012683_Abhd17c	ENSRNOG00000012683	361601	Abhd17c	1	146248503	146289465	0.120805	0.547981	0.902597	U	N	N	430.38	252.813	291.14	273.416	393.452	265.052	623.104	260.859	297.392	317.649	301.587	304.893
ENSRNOG00000013017_Arnt2	ENSRNOG00000013017	25243	Arnt2	1	146399217	146556171	0.301112	0.245624	0.756019	U	N	N	42.632	13.9483	9.91498	11.8876	14.7238	34.9293	17.2375	28.7904	42.7902	51.6592	11.013	30.1797
ENSRNOG00000013223_Fah	ENSRNOG00000013223	29383	Fah	1	146713676	146736261	-0.02415	0.906603	0.98495	D	N	N	89.3242	119.432	100.051	111.234	88.3426	182.865	113.001	185.829	96.278	90.1287	83.8683	102.921
ENSRNOG00000013506_Zfand6	ENSRNOG00000013506	293067	Zfand6	1	146745859	146823762	-0.560466	7.53969e-08	8.34528e-05	D	Y	Y	759.256	609.367	670.613	644.48	726.372	791.045	547.769	430.112	401.158	482.518	457.463	469.72
ENSRNOG00000037327_F8a1	ENSRNOG00000037327	501661	F8a1	1	147021436	147022950	-0.0392882	0.8019	0.962121	D	N	N	257.822	211.84	260.494	219.921	254.394	256.833	247.709	348.975	186.137	235.214	205.858	190.364
ENSRNOG00000054930_AABR07004572.1	ENSRNOG00000054930	NA	AABR07004572.1	1	147696656	147700221	0.297951	0.258883	0.765295	U	N	N	6.09029	5.23062	1.80272	11.0385	4.90792	4.10933	5.10741	8.72438	8.55805	6.59479	7.62439	13.9291
ENSRNOG00000050401_Vbp1	ENSRNOG00000050401	681825	Vbp1	1	148424977	148443358	-0.0594115	0.6934	0.942315	D	N	N	483.163	400.142	413.725	449.183	395.906	593.798	384.332	604.599	364.787	475.924	389.691	386.146
ENSRNOG00000013925_Nox4	ENSRNOG00000013925	85431	Nox4	1	150797084	150976194	0.0998214	0.704033	0.943634	U	N	N	20.301	85.4334	133.402	42.4559	29.4475	65.7492	155.776	38.3873	81.3014	31.8748	63.5366	58.8118
ENSRNOG00000016496_Ctsc	ENSRNOG00000016496	25423	Ctsc	1	151918571	151949983	-0.188222	0.418212	0.848633	D	N	N	2216.87	3907.27	2979.9	2138.93	1388.94	4830.51	2721.61	1067.86	2457.23	3121.53	2549.93	2696.83
ENSRNOG00000016769_Rab38	ENSRNOG00000016769	252916	Rab38	1	152072665	152153449	-0.379156	0.0919327	0.582405	D	N	N	294.364	522.19	344.32	338.798	121.062	460.245	253.455	163.146	303.811	261.593	256.688	232.152
ENSRNOG00000016815_Tmem135	ENSRNOG00000016815	293098	Tmem135	1	152886996	153096269	-0.0933609	0.577904	0.910366	D	N	N	336.996	273.736	326.293	228.413	332.103	240.396	408.593	223.344	232.137	257.197	232.12	259.236
ENSRNOG00000016848_Fzd4	ENSRNOG00000016848	64558	Fzd4	1	153589471	153598375	-0.0191052	0.932295	0.989544	D	N	N	375.568	407.116	532.705	247.942	247.032	304.09	439.875	380.383	369.066	178.059	202.47	506.865
ENSRNOG00000017307_Prss23	ENSRNOG00000017307	308807	Prss23	1	153732532	153752541	-0.195927	0.419457	0.849557	D	N	N	736.925	988.586	1627.86	472.958	494.064	889.669	1377.72	596.747	619.389	403.381	692.972	591.213
ENSRNOG00000017311_Me3	ENSRNOG00000017311	361602	Me3	1	153861569	154056654	-0.246281	0.347871	0.814094	D	N	N	12.1806	65.3827	26.1395	46.7015	31.9015	43.1479	15.3222	28.7904	55.6273	10.9913	12.7073	42.5611
ENSRNOG00000017383_Hikeshi	ENSRNOG00000017383	293103	Hikeshi	1	154142836	154170409	-0.584315	0.00171256	0.103692	D	N	N	714.594	311.222	466.905	388.896	326.377	497.229	280.269	304.481	232.137	362.713	249.063	246.855
ENSRNOG00000017509_Eed	ENSRNOG00000017509	293104	Eed	1	154189260	154216340	-0.15154	0.214309	0.735162	D	N	N	369.478	278.966	296.548	331.156	359.914	279.434	291.122	239.048	248.183	340.731	300.74	293.285
ENSRNOG00000062120_LOC102550036	ENSRNOG00000062120	NA	LOC102550036	1	154371892	154376984	0.0718185	0.786044	0.957615	U	N	N	4.06019	2.61531	9.01362	13.5859	6.5439	6.16399	8.29954	14.8314	5.34878	4.39652	5.93008	8.51223
ENSRNOG00000018322_Picalm	ENSRNOG00000018322	89816	Picalm	1	154377247	154458425	-0.0258519	0.837355	0.971043	D	N	N	2160.02	2256.14	2165.97	2583.02	2051.51	1884.13	2491.78	1567.77	1937.33	2346.64	2407.61	2107.16
ENSRNOG00000030776_Sytl2	ENSRNOG00000030776	NA	Sytl2	1	154579949	154599430	-0.31877	0.223699	0.742093	D	N	N	286.244	314.709	201.004	1293.21	1443.75	197.248	522.232	257.369	530.599	108.814	598.091	318.822
ENSRNOG00000022732_Tmem126b	ENSRNOG00000022732	293114	Tmem126b	1	156262031	156275002	-0.31995	0.0711365	0.54417	D	N	N	249.702	135.124	197.398	174.918	152.964	260.942	167.268	195.426	134.789	145.085	117.754	136.97
ENSRNOG00000022748_Tmem126a	ENSRNOG00000022748	293113	Tmem126a	1	156283128	156291052	-0.599869	0.000181852	0.0254046	D	Y	Y	239.551	144.714	185.681	218.223	177.503	232.177	148.753	146.57	91.999	105.517	120.296	131.553
ENSRNOG00000018987_Crebzf	ENSRNOG00000018987	293112	Crebzf	1	156294519	156296161	0.175699	0.477383	0.873379	U	N	N	75.1136	147.329	79.3198	220.771	184.865	59.5852	119.386	97.713	217.16	101.12	234.662	156.315
ENSRNOG00000022635_Dlg2	ENSRNOG00000022635	64053	Dlg2	1	156552328	157269747	0.543181	0.034372	0.434219	U	N	N	0	5.23062	2.70409	3.39647	1.63597	0	8.93796	4.36219	11.7673	6.59479	1.69431	9.28607
ENSRNOG00000009462_Ccdc90b	ENSRNOG00000009462	308820	Ccdc90b	1	157403595	157417147	-0.282797	0.0701467	0.541521	D	N	N	416.17	277.223	388.487	247.093	235.58	369.839	278.354	276.563	234.276	284.675	232.967	239.89
ENSRNOG00000009664_Ankrd42	ENSRNOG00000009664	293117	Ankrd42	1	157419123	157461588	-0.112741	0.599596	0.914909	D	N	N	46.6922	149.944	122.585	151.992	134.968	121.225	81.7185	107.31	150.836	78.0383	131.309	116.076
ENSRNOG00000009891_Pcf11	ENSRNOG00000009891	361605	Pcf11	1	157468626	157494008	-0.0433653	0.859325	0.975481	D	N	N	154.287	400.142	236.157	551.077	532.51	191.084	237.494	218.982	457.855	214.331	428.66	425.611
ENSRNOG00000010224_Rab30	ENSRNOG00000010224	308821	Rab30	1	157573324	157660008	-0.0947499	0.696939	0.942385	D	N	N	58.8728	33.1272	52.279	28.87	46.6253	12.328	52.9894	25.3007	26.7439	48.3618	28.8032	29.4059
ENSRNOG00000022521_Ddias	ENSRNOG00000022521	499204	Ddias	1	157675765	157700064	-0.258067	0.299282	0.791612	D	N	N	40.6019	34.8708	21.6327	34.8138	39.2634	69.8586	14.0454	26.1731	17.1161	51.6592	30.4975	41.7873
ENSRNOG00000010630_Prcp	ENSRNOG00000010630	293118	Prcp	1	157701089	157750169	-0.234447	0.306765	0.795254	D	N	N	564.367	512.6	581.378	264.076	181.593	523.939	317.936	468.499	217.16	461.635	277.019	366.8
ENSRNOG00000010763_Fam181b	ENSRNOG00000010763	499205	Fam181b	1	157920786	157922274	0.314544	0.224574	0.743019	U	N	N	152.257	73.2286	112.67	118.876	112.882	100.679	94.487	472.861	124.092	118.706	101.658	61.1333
ENSRNOG00000052460_AABR07004812.2	ENSRNOG00000052460	NA	AABR07004812.2	1	158913005	158913381	-0.0929719	0.72476	0.945853	D	N	N	2.0301	10.4612	9.91498	19.5297	14.7238	12.328	4.46898	7.85194	17.1161	4.39652	14.4016	14.7029
ENSRNOG00000011151_Tenm4	ENSRNOG00000011151	308831	Tenm4	1	161401527	161880923	0.216293	0.392177	0.837676	U	N	N	6.09029	205.738	21.6327	57.74	15.5418	12.328	117.47	120.396	68.4644	30.7757	59.3008	89.7653
ENSRNOG00000011476_Nars2	ENSRNOG00000011476	293128	Nars2	1	161922141	162034700	0.0985396	0.501907	0.884801	U	N	N	115.715	84.5616	109.065	90.0065	127.606	82.1865	117.47	93.3508	104.836	126.4	102.506	113.754
ENSRNOG00000011882_Gab2	ENSRNOG00000011882	84477	Gab2	1	162083030	162279727	0.518905	0.00982412	0.244144	U	N	N	30.4514	52.3062	51.3776	27.1718	33.5375	24.656	67.0347	47.1116	54.5575	51.6592	58.4536	67.324
ENSRNOG00000024961_Usp35	ENSRNOG00000024961	308834	Usp35	1	162284777	162300515	0.0280064	0.912294	0.985452	U	N	N	14.2107	18.3072	14.4218	25.4735	33.5375	10.2733	13.4069	31.4078	20.3254	9.89218	29.6504	18.5721
ENSRNOG00000024793_Kctd21	ENSRNOG00000024793	NA	Kctd21	1	162320730	162325013	0.0445169	0.807946	0.963399	U	N	N	42.632	74.1004	66.7008	63.6838	81.7987	41.0933	61.9273	80.2643	78.0922	60.4522	55.065	58.8118
ENSRNOG00000012292_Alg8	ENSRNOG00000012292	293129	Alg8	1	162342051	162362141	-0.150511	0.336066	0.807148	D	N	N	192.859	146.457	121.684	141.803	147.238	205.466	104.702	154.421	133.719	131.896	160.112	155.542
ENSRNOG00000012383_Ndufc2	ENSRNOG00000012383	293130	Ndufc2	1	162369801	162376023	-0.581607	0.00322485	0.14825	D	N	N	651.661	420.193	528.198	480.601	435.987	957.473	345.388	495.545	250.323	384.696	297.351	356.74
ENSRNOG00000012404_Thrsp	ENSRNOG00000012404	25357	Thrsp	1	162381253	162385575	-0.0250322	0.90717	0.98495	D	N	N	154.287	1013.87	1309.68	253.037	38.4454	5227.06	517.763	759.021	1031.24	513.294	171.972	4370.64
ENSRNOG00000012494_Kctd14	ENSRNOG00000012494	308836	Kctd14	1	162419262	162424825	0.230618	0.325022	0.804764	U	N	N	194.889	194.405	176.667	150.294	179.957	281.489	426.469	349.848	213.951	182.456	94.0341	195.007
ENSRNOG00000012552_Ints4	ENSRNOG00000012552	308837	Ints4	1	162447680	162511355	0.0387125	0.768922	0.953598	U	N	N	592.788	560.548	493.946	581.646	575.863	735.57	592.459	795.663	622.598	569.35	489.655	564.129
ENSRNOG00000012584_Aamdc	ENSRNOG00000012584	361606	Aamdc	1	162519521	162533893	-0.237861	0.343811	0.81097	D	N	N	36.5417	35.7425	36.0545	37.3612	26.1756	84.2412	37.6671	60.1982	33.1624	14.2887	18.6374	30.1797
ENSRNOG00000024194_Rsf1	ENSRNOG00000024194	308839	Rsf1	1	162549420	162662170	0.37591	0.0399789	0.461883	U	N	N	119.776	177.841	144.218	175.767	243.76	131.498	238.133	155.294	234.276	189.051	251.605	286.32
ENSRNOG00000012788_Clns1a	ENSRNOG00000012788	65160	Clns1a	1	162676269	162696544	-0.170611	0.280269	0.776593	D	N	N	862.791	518.703	653.487	473.808	488.338	593.798	595.013	563.595	435.391	613.315	492.197	438.767
ENSRNOG00000013358_Aqp11	ENSRNOG00000013358	286758	Aqp11	1	162703442	162713610	-0.099994	0.70118	0.943012	D	N	N	26.3913	10.4612	9.01362	6.79294	16.3597	16.4373	5.74583	18.3212	22.4649	4.39652	10.1658	11.6076
ENSRNOG00000029784_Pak1	ENSRNOG00000029784	29431	Pak1	1	162768156	162883355	0.36962	0.13808	0.660989	U	N	N	422.26	198.763	431.752	354.931	858.886	184.92	807.609	905.59	518.832	641.892	430.354	315.726
ENSRNOG00000013641_Myo7a	ENSRNOG00000013641	266714	Myo7a	1	163001875	163071508	0.0544308	0.820777	0.966496	U	N	N	60.9029	41.8449	83.8267	45.0032	39.2634	16.4373	46.6051	34.8975	42.7902	70.3444	71.1609	40.2396
ENSRNOG00000014251_Capn5	ENSRNOG00000014251	171495	Capn5	1	163073124	163129641	-0.0895115	0.580452	0.910405	D	N	N	414.14	545.728	424.541	427.106	593.859	507.502	485.204	413.535	630.086	314.351	382.914	493.709
ENSRNOG00000036866_Acer3	ENSRNOG00000036866	499210	Acer3	1	163160979	163263606	-0.290915	0.0227428	0.371176	D	N	N	542.036	460.294	425.443	465.316	548.051	466.409	438.599	485.075	309.159	379.2	331.237	396.206
ENSRNOG00000027784_Tsku	ENSRNOG00000027784	308843	Tsku	1	163317282	163328591	-0.0631902	0.785837	0.957524	D	N	N	450.681	225.788	409.218	593.533	589.769	205.466	634.595	369.914	419.344	283.576	383.761	242.212
ENSRNOG00000015310_Lrrc32	ENSRNOG00000015310	293135	Lrrc32	1	163445527	163457424	-0.155606	0.465153	0.869345	D	N	N	464.892	312.093	476.82	314.174	220.039	199.302	357.519	312.333	182.928	230.817	393.079	256.141
ENSRNOG00000056551_AABR07004868.1	ENSRNOG00000056551	NA	AABR07004868.1	1	163520160	163523003	-0.311147	0.200522	0.726098	D	N	N	0	18.3072	13.5204	22.0771	0.817987	36.9839	3.83056	6.9795	11.7673	5.49565	5.08292	13.1553
ENSRNOG00000015560_Emsy	ENSRNOG00000015560	361607	Emsy	1	163545326	163611299	0.227763	0.29008	0.783242	U	N	N	66.9932	179.584	94.643	147.746	189.773	92.4599	158.33	120.396	204.323	118.706	174.514	175.661
ENSRNOG00000053923_Thap12	ENSRNOG00000053923	308845	Thap12	1	163663407	163679191	-0.053485	0.711186	0.945248	D	N	N	783.617	748.85	697.654	492.488	955.409	645.164	816.547	614.196	685.713	655.082	661.627	718.123
ENSRNOG00000015982_Wnt11	ENSRNOG00000015982	140584	Wnt11	1	163797660	163813756	-0.443868	0.0601086	0.52276	D	N	N	62.933	91.5358	72.109	155.389	98.1584	61.6399	68.95	47.1116	85.5805	26.3791	80.4796	47.978
ENSRNOG00000016206_Uvrag	ENSRNOG00000016206	308846	Uvrag	1	163844818	164101578	0.108117	0.443921	0.862269	U	N	N	237.521	346.964	315.477	395.689	432.715	295.872	349.857	374.276	360.508	440.752	333.779	353.644
ENSRNOG00000016573_Dgat2	ENSRNOG00000016573	252900	Dgat2	1	164113459	164143818	0.235813	0.332782	0.807045	U	N	N	345.116	469.012	292.943	209.732	557.049	501.338	479.458	547.891	532.738	350.623	177.055	921.642
ENSRNOG00000027204_Map6	ENSRNOG00000027204	29457	Map6	1	164225934	164292093	0.0948726	0.579001	0.910366	U	N	N	288.274	169.995	190.187	298.04	269.936	221.904	174.29	285.287	268.509	314.351	260.076	247.628
ENSRNOG00000016831_Serpinh1	ENSRNOG00000016831	29345	Serpinh1	1	164301010	164308317	-0.304632	0.103351	0.605954	D	N	N	9967.77	7417.89	9348.93	7017.11	6761.48	11520.5	4730.74	9534.87	5864.4	8173.14	4692.39	7606.06
ENSRNOG00000036859_Gdpd5	ENSRNOG00000036859	499211	Gdpd5	1	164380577	164418593	0.0108359	0.960723	0.993702	U	N	N	353.237	672.134	494.848	697.126	346.009	865.013	344.112	652.583	850.456	536.376	422.73	655.442
ENSRNOG00000017418_Rps3	ENSRNOG00000017418	140654	Rps3	1	164435878	164441167	-0.273187	0.186706	0.714416	D	N	N	19618.9	13250.9	18946.6	10609.7	7325.07	16285.3	10924.1	16015.3	9761.52	13653.4	8965.43	8752.12
ENSRNOG00000030404_Arrb1	ENSRNOG00000030404	25387	Arrb1	1	164502389	164593139	0.177889	0.414669	0.847679	U	N	N	138.047	163.021	94.643	114.631	138.24	108.897	81.7185	170.125	219.3	97.8227	109.283	210.484
ENSRNOG00000017922_Tpbgl	ENSRNOG00000017922	681316	Tpbgl	1	164589408	164590562	0.477689	0.057727	0.519637	U	N	N	14.2107	3.48708	5.40817	0	3.27195	2.05466	12.1301	13.959	3.20927	9.89218	14.4016	9.28607
ENSRNOG00000017976_Slco2b1	ENSRNOG00000017976	140860	Slco2b1	1	164623599	164671577	0.133358	0.608976	0.918029	U	N	N	229.401	428.911	502.059	177.466	107.156	137.662	367.733	720.634	186.137	158.275	203.317	228.283
ENSRNOG00000018106_Neu3	ENSRNOG00000018106	117185	Neu3	1	164803574	164814651	-0.120693	0.585888	0.911336	D	N	N	62.933	37.4861	27.0409	41.6068	76.0728	71.9132	46.6051	43.6219	66.3249	40.6678	43.2049	40.2396
ENSRNOG00000018164_Spcs2	ENSRNOG00000018164	293142	Spcs2	1	164829896	164849749	-0.373307	0.0232604	0.373416	D	N	N	2700.03	1537.8	2205.63	1427.37	1711.23	2225.2	1665.01	1415.97	1138.22	1814.67	1344.43	1440.89
ENSRNOG00000026408_Rnf169	ENSRNOG00000026408	685009	Rnf169	1	164922080	164977633	0.467829	0.00426948	0.168902	U	N	N	44.6621	47.9473	49.5749	36.5121	36.8094	43.1479	69.5884	51.4738	69.5341	53.8574	61.8422	63.4548
ENSRNOG00000018394_Chrdl2	ENSRNOG00000018394	308854	Chrdl2	1	165008912	165036435	-0.0885265	0.712245	0.945355	D	N	N	8.12039	28.7684	22.534	5.94382	0.817987	92.4599	7.02269	34.8975	14.9766	15.3878	9.31869	45.6565
ENSRNOG00000018411_Pold3	ENSRNOG00000018411	293144	Pold3	1	165083622	165123455	0.249218	0.0822608	0.569251	U	N	N	162.408	235.378	184.779	199.543	216.767	246.56	217.065	251.262	198.975	326.442	266.006	246.081
ENSRNOG00000016906_Lipt2	ENSRNOG00000016906	365314	Lipt2	1	165170645	165172972	-0.0349761	0.862674	0.976787	D	N	N	89.3242	59.2803	66.7008	54.3435	39.2634	88.3505	65.7579	86.3713	55.6273	64.8487	44.052	60.3594
ENSRNOG00000017054_Kcne3	ENSRNOG00000017054	63883	Kcne3	1	165189985	165196948	-0.0940625	0.717534	0.945853	D	N	N	38.5718	19.1789	21.6327	39.0594	7.36188	43.1479	8.29954	42.7494	24.6044	20.8835	28.8032	22.4413
ENSRNOG00000017079_Pgm2l1	ENSRNOG00000017079	685076	Pgm2l1	1	165237847	165286980	-0.1906	0.153298	0.681647	D	N	N	150.227	167.38	162.245	147.746	123.516	133.553	141.092	119.524	99.4873	128.598	149.946	128.457
ENSRNOG00000017118_P4ha3	ENSRNOG00000017118	361612	P4ha3	1	165295847	165330322	0.279843	0.286745	0.779949	U	N	N	66.9932	29.6402	87.4321	25.4735	40.0814	34.9293	135.985	19.1936	36.3717	78.0383	121.143	24.7628
ENSRNOG00000017227_Ppme1	ENSRNOG00000017227	361613	Ppme1	1	165335242	165382216	-0.00960464	0.938424	0.989916	D	N	N	720.684	455.064	491.242	550.228	622.488	552.705	562.453	563.595	544.506	656.181	552.344	480.554
ENSRNOG00000017608_C2cd3	ENSRNOG00000017608	293148	C2cd3	1	165382690	165479655	0.282022	0.0851831	0.570512	U	N	N	196.919	227.532	175.766	208.034	316.561	170.537	222.172	215.492	305.95	281.378	298.198	300.25
ENSRNOG00000017716_Ucp3	ENSRNOG00000017716	25708	Ucp3	1	165482155	165496206	0.258366	0.313116	0.798409	U	N	N	56.8427	25.2813	109.966	49.2488	28.6295	18.492	75.3343	40.1321	47.0692	74.7409	94.0341	56.4903
ENSRNOG00000017854_Ucp2	ENSRNOG00000017854	54315	Ucp2	1	165506361	165512744	-0.103537	0.615423	0.919233	D	N	N	20739.5	7009.9	12805.6	12428.5	8596.23	9050.79	9868.15	9943.17	9115.39	14946	11229	9539.89
ENSRNOG00000017975_Dnajb13	ENSRNOG00000017975	308857	Dnajb13	1	165515726	165530095	-0.214334	0.408537	0.846305	D	N	N	26.3913	17.4354	13.5204	84.0626	37.6274	6.16399	7.66111	6.10706	34.2322	24.1809	41.5105	17.7983
ENSRNOG00000025385_Coa4	ENSRNOG00000025385	499214	Coa4	1	165549344	165552572	-0.181701	0.282498	0.777448	D	N	N	219.25	115.945	148.725	146.048	116.972	211.63	130.877	149.187	115.534	150.581	138.086	133.874
ENSRNOG00000018042_Mrpl48	ENSRNOG00000018042	293149	Mrpl48	1	165563788	165606375	-0.247274	0.238075	0.751567	D	N	N	665.872	364.4	509.269	399.934	305.109	725.296	308.36	616.813	367.996	456.139	308.364	333.525
ENSRNOG00000018176_Rab6a	ENSRNOG00000018176	84379	Rab6a	1	165625058	165664192	-0.36118	0.000156354	0.0231936	D	Y	Y	1946.86	1947.53	2174.99	1824.75	1730.04	1812.21	1693.11	1299.06	1320.08	1437.66	1449.48	1621.97
ENSRNOG00000018627_Plekhb1	ENSRNOG00000018627	64471	Plekhb1	1	165665909	165680206	0.189642	0.468636	0.870791	U	N	N	592.788	395.783	644.474	801.567	204.497	1727.97	358.795	2794.42	1136.08	387.993	289.727	858.961
ENSRNOG00000018873_Fam168a	ENSRNOG00000018873	361614	Fam168a	1	165724451	165878652	0.379361	0.0561515	0.515612	U	N	N	296.394	426.295	311.871	241.149	382	180.81	424.553	269.583	557.343	364.911	385.455	532.401
ENSRNOG00000025075_Relt	ENSRNOG00000025075	361615	Relt	1	165884407	165901923	0.0762143	0.760768	0.951296	U	N	N	71.0534	34.8708	57.6872	45.8523	70.3469	24.656	46.6051	26.1731	40.6507	90.1287	93.1869	34.8228
ENSRNOG00000053502_Arhgef17	ENSRNOG00000053502	NA	Arhgef17	1	165911718	165967069	0.488317	0.00991544	0.244304	U	N	N	361.357	530.036	405.613	393.991	453.165	330.801	544.577	383.873	907.153	461.635	598.938	802.471
ENSRNOG00000019270_P2ry6	ENSRNOG00000019270	117264	P2ry6	1	165972440	165997751	0.0159277	0.951074	0.991339	U	N	N	223.311	111.586	198.3	58.5891	75.2548	102.733	130.877	51.4738	69.5341	267.089	188.068	75.8362
ENSRNOG00000019283_P2ry2	ENSRNOG00000019283	29597	P2ry2	1	166031272	166037424	0.171899	0.510569	0.888315	U	N	N	99.4747	87.1769	96.4457	50.9471	44.1713	16.4373	62.5657	25.3007	77.0224	111.012	157.571	56.4903
ENSRNOG00000019319_Fchsd2	ENSRNOG00000019319	308864	Fchsd2	1	166125474	166395915	0.0888835	0.633142	0.924592	U	N	N	326.846	263.274	337.109	338.798	406.54	209.576	395.186	210.257	281.346	412.174	432.896	296.38
ENSRNOG00000019413_Atg16l2	ENSRNOG00000019413	308865	Atg16l2	1	166401271	166413564	-0.167318	0.52023	0.89286	D	N	N	28.4214	77.5875	33.3504	163.031	92.4325	39.0386	62.5657	63.688	77.0224	24.1809	84.7154	46.4303
ENSRNOG00000019491_Stard10	ENSRNOG00000019491	293150	Stard10	1	166428761	166457509	-0.0121808	0.943563	0.990449	D	N	N	351.207	407.116	386.684	461.92	462.981	614.344	592.459	540.039	438.6	305.558	412.564	363.704
ENSRNOG00000019555_Arap1	ENSRNOG00000019555	361617	Arap1	1	166478005	166525255	0.0958596	0.29679	0.789729	U	N	N	864.821	938.024	995.104	1069.89	1111.64	901.997	1136.4	985.855	1069.76	1038.68	1147.05	939.441
ENSRNOG00000019560_Pde2a	ENSRNOG00000019560	81743	Pde2a	1	166534643	166626158	-0.405314	0.0966805	0.593995	D	N	N	383.688	469.012	667.909	1133.57	526.784	209.576	340.281	405.684	356.229	242.908	616.728	294.059
ENSRNOG00000019687_Art2b	ENSRNOG00000019687	293152	Art2b	1	166667169	166677026	-0.166192	0.527193	0.895797	D	N	N	16.2408	82.8181	35.1531	30.5682	19.6317	28.7653	23.6218	7.85194	10.6976	71.4435	34.7333	20.8937
ENSRNOG00000019693_Clpb	ENSRNOG00000019693	65041	Clpb	1	166739532	166866107	0.0597128	0.722745	0.945853	U	N	N	263.913	229.275	207.313	168.125	240.488	388.331	259.201	303.608	228.928	273.684	249.063	240.664
ENSRNOG00000019730_Inppl1	ENSRNOG00000019730	65038	Inppl1	1	166899894	166912524	0.0941148	0.700612	0.943012	U	N	N	310.605	409.732	332.603	855.911	867.884	211.63	566.284	333.271	735.992	395.687	682.806	580.379
ENSRNOG00000019890_Folr2	ENSRNOG00000019890	293154	Folr2	1	166915045	166919302	-0.360734	0.149923	0.674799	D	N	N	576.547	242.352	319.983	115.48	173.413	209.576	324.959	123.014	126.231	164.87	240.592	130.779
ENSRNOG00000019902_Folr1	ENSRNOG00000019902	171049	Folr1	1	166934460	166943592	-0.244438	0.348639	0.81468	D	N	N	42.632	100.253	76.6158	20.3788	26.9936	189.029	22.3449	121.269	37.4414	29.6765	22.026	77.3839
ENSRNOG00000019936_Anapc15	ENSRNOG00000019936	293155	Anapc15	1	166983175	166985054	-0.230647	0.246358	0.756019	D	N	N	146.167	70.6133	84.728	70.4768	69.5289	139.717	84.2722	87.2438	60.9761	83.534	80.4796	71.1932
ENSRNOG00000020016_LOC100361543	ENSRNOG00000020016	308869	Lamtor1	1	166991474	166997045	-0.163846	0.265371	0.770646	D	N	N	1370.32	883.974	1156.45	810.058	924.325	1249.24	995.306	1108	809.805	1043.08	839.53	838.842
ENSRNOG00000020124_Lrrc51	ENSRNOG00000020124	293156	Lrrc51	1	166997967	167005839	-0.454471	0.082714	0.570203	D	N	N	16.2408	11.333	19.83	16.1332	4.90792	20.5466	8.29954	15.7039	6.41853	3.29739	10.1658	3.8692
ENSRNOG00000000417_Numa1	ENSRNOG00000000417	308870	Numa1	1	167051209	167091453	0.311475	0.0554469	0.512412	U	N	N	1037.38	1596.21	1248.39	1841.74	2062.96	1304.71	1951.67	1765.81	2352.39	1601.43	1804.44	2116.45
ENSRNOG00000020150_Il18bp	ENSRNOG00000020150	84388	Il18bp	1	167091522	167093560	0.39926	NA	NA	U	NA	NA	115.715	106.356	97.3471	105.291	65.439	172.592	111.086	101.203	104.836	605.621	121.143	71.967
ENSRNOG00000020175_Rnf121	ENSRNOG00000020175	308871	Rnf121	1	167095962	167165265	-0.0688717	0.647692	0.928281	D	N	N	300.454	214.455	213.623	188.504	214.313	328.746	263.67	246.9	226.788	230.817	205.858	195.007
ENSRNOG00000020188_LOC102549471	ENSRNOG00000020188	64573	LOC102549471	1	167169442	167192801	0.192999	0.436421	0.859379	U	N	N	14.2107	12.2048	18.0272	13.5859	12.2698	20.5466	8.29954	17.4488	16.0463	32.9739	14.4016	21.6675
ENSRNOG00000020347_Nup98	ENSRNOG00000020347	81738	Nup98	1	167213866	167308851	0.196917	0.0907528	0.579345	U	N	N	887.152	966.792	895.052	773.546	1056.84	786.936	1175.34	804.388	1010.92	1039.78	1051.32	1121.29
ENSRNOG00000020371_Pgap2	ENSRNOG00000020371	116675	Pgap2	1	167309051	167334741	0.156592	0.342934	0.810845	U	N	N	274.063	190.046	242.466	189.353	227.4	180.81	328.151	175.36	246.044	217.628	292.268	209.71
ENSRNOG00000020393_Rhog	ENSRNOG00000020393	308875	Rhog	1	167335248	167347671	0.0612947	0.726125	0.945853	U	N	N	1118.58	798.541	877.025	748.073	738.642	786.936	953.17	768.618	631.156	1324.45	979.31	659.311
ENSRNOG00000051224_Rn50_1_1736.2	ENSRNOG00000051224	NA	AABR07004912.2	1	167355611	167355907	-0.255284	0.309476	0.797324	D	N	N	20.301	3.48708	5.40817	7.64206	4.08994	30.82	7.02269	10.4693	6.41853	12.0904	5.08292	1.54768
ENSRNOG00000020425_Stim1	ENSRNOG00000020425	361618	Stim1	1	167373678	167533420	0.0232586	0.915139	0.986658	U	N	N	818.129	654.699	775.171	596.93	1616.34	528.049	861.237	1244.1	859.014	612.216	729.4	791.637
ENSRNOG00000045752_Rrm1	ENSRNOG00000045752	685579	Rrm1	1	167538263	167562688	-0.0227396	0.916306	0.987103	D	N	N	1660.62	845.616	749.032	690.333	755.82	1543.05	665.878	1097.53	811.945	1403.59	990.323	1140.64
ENSRNOG00000059027_AC098008.2	ENSRNOG00000059027	NA	AC098008.5	1	167672812	167673926	-0.409489	0.102796	0.605116	D	N	N	28.4214	73.2286	40.5613	132.462	129.242	63.6946	30.006	44.4943	58.8366	40.6678	64.3837	67.324
ENSRNOG00000018517_Trim21	ENSRNOG00000018517	308901	Trim21	1	167686173	167708714	-0.00429267	0.982766	0.998009	D	N	N	306.545	475.986	414.626	472.958	424.535	390.386	389.44	218.982	393.67	701.246	393.079	386.146
ENSRNOG00000047229_Trim68	ENSRNOG00000047229	684189	Trim68	1	167835647	167849834	0.081758	0.684529	0.940229	U	N	N	34.5116	29.6402	33.3504	36.5121	40.0814	22.6013	40.8593	26.1731	45.9995	26.3791	43.2049	30.9536
ENSRNOG00000018551_Olr63	ENSRNOG00000018551	365323	Olr63	1	167870452	167871405	-0.0298184	0.909062	0.985452	D	N	N	73.0835	14.8201	21.6327	12.7368	8.99786	12.328	38.944	21.8109	27.8136	6.59479	16.0959	21.6675
ENSRNOG00000059786_AC107531.3	ENSRNOG00000059786	NA	AC107531.3	1	168668707	168716854	-0.188937	0.448887	0.862495	D	N	N	81.2039	237.121	161.344	327.759	314.107	113.006	106.617	170.125	251.393	81.3357	217.719	190.364
ENSRNOG00000047098_LOC103694855	ENSRNOG00000047098	689064	LOC103694855	1	168945449	168965566	-0.549459	0.0218551	0.364581	D	N	N	836.4	52.3062	443.47	12.7368	67.0749	184.92	27.4523	171.87	39.581	92.327	102.506	54.9426
ENSRNOG00000061299_LOC103694857	ENSRNOG00000061299	100134871	LOC100134871	1	168957460	168958836	-0.503132	0.0378117	0.452553	D	N	N	2649.28	250.198	1338.52	37.3612	142.33	489.01	118.109	665.67	151.905	249.503	317.683	197.329
ENSRNOG00000058105_Hbb	ENSRNOG00000058105	24440	Hbb	1	168971274	168972725	-0.447629	0.0644522	0.532113	D	N	N	2598.52	263.274	1553.95	39.0594	170.959	608.18	113.001	833.178	110.185	355.019	352.416	244.533
ENSRNOG00000017147_Trim6	ENSRNOG00000017147	293294	Trim6	1	169410115	169423283	-0.159019	0.541677	0.901502	D	N	N	12.1806	18.3072	13.5204	6.79294	6.5439	12.328	6.38426	27.0456	3.20927	2.19826	6.77723	7.73839
ENSRNOG00000042686_Trim34	ENSRNOG00000042686	101241893	Trim34	1	169433539	169445041	-0.140194	0.449895	0.863129	D	N	N	190.829	401.014	264.099	400.783	393.452	308.2	264.947	204.15	373.345	268.188	338.862	306.44
ENSRNOG00000017191_Trim30c	ENSRNOG00000017191	308906	Trim5	1	169446805	169534896	0.002726	0.987721	0.99829	U	N	N	462.862	626.802	525.494	742.129	662.569	501.338	538.831	403.939	583.017	900.188	623.505	489.066
ENSRNOG00000031202_Trim30c	ENSRNOG00000031202	102554102	Trim30c	1	169491920	169513537	-0.241627	0.285339	0.77893	D	N	N	387.748	752.337	524.593	1355.19	1067.47	641.055	395.824	796.536	656.83	552.863	812.421	579.605
ENSRNOG00000017408_Fam160a2	ENSRNOG00000017408	293343	Fam160a2	1	170212817	170238890	0.0724019	0.690426	0.941306	U	N	N	174.588	255.428	191.089	290.398	263.392	145.881	223.449	205.895	302.741	163.771	246.522	267.748
ENSRNOG00000017914_Prkcdbp	ENSRNOG00000017914	85332	Cavin3	1	170317113	170318935	-0.0621384	0.734839	0.947134	D	N	N	868.881	594.547	800.409	723.448	449.075	941.036	815.908	875.055	656.83	444.049	712.457	648.477
ENSRNOG00000017977_Smpd1	ENSRNOG00000017977	308909	Smpd1	1	170383682	170387524	0.127476	0.428831	0.854751	U	N	N	962.266	901.409	1201.52	624.951	780.36	988.293	1338.14	1047.8	1033.38	890.296	810.726	898.427
ENSRNOG00000018020_Apbb1	ENSRNOG00000018020	29722	Apbb1	1	170387609	170404056	0.191569	0.259016	0.765295	U	N	N	186.769	177.841	179.371	145.199	112.064	145.881	191.528	255.624	191.486	146.184	142.322	170.245
ENSRNOG00000018257_Hpx	ENSRNOG00000018257	58917	Hpx	1	170423483	170431073	-0.166513	0.520717	0.893146	D	N	N	2.0301	9.58946	9.01362	26.3226	24.5396	10.2733	1.91528	12.2141	13.9068	3.29739	19.4845	12.3814
ENSRNOG00000018356_Trim3	ENSRNOG00000018356	83616	Trim3	1	170441639	170464341	0.012714	0.92728	0.989268	U	N	N	243.612	236.249	206.412	303.135	290.385	195.193	214.511	270.456	280.276	206.637	260.076	265.427
ENSRNOG00000018440_Arfip2	ENSRNOG00000018440	293344	Arfip2	1	170466395	170471076	-0.147089	0.529784	0.89641	D	N	N	182.709	260.659	187.483	637.687	451.529	304.09	236.218	306.226	339.113	181.357	362.582	338.168
ENSRNOG00000050846_Timm10b	ENSRNOG00000050846	84384	Timm10b	1	170471238	170474113	-0.190897	0.342445	0.810845	D	N	N	231.431	132.509	191.99	178.315	140.694	269.161	132.793	249.517	117.673	190.15	144.016	133.1
ENSRNOG00000051291_Dnhd1	ENSRNOG00000051291	690115	Dnhd1	1	170471272	170565063	-0.277857	0.285817	0.779214	D	N	N	14.2107	54.0497	18.0272	146.897	99.7944	22.6013	12.7685	20.9385	57.7668	24.1809	72.8552	41.0135
ENSRNOG00000018766_Rrp8	ENSRNOG00000018766	308911	Rrp8	1	170574349	170579616	0.0968709	0.438596	0.859379	U	N	N	113.685	108.971	104.558	106.989	103.884	100.679	124.493	98.5855	108.045	109.913	105.047	136.97
ENSRNOG00000018993_Ilk	ENSRNOG00000018993	170922	Ilk	1	170578889	170585189	-0.0871578	0.517052	0.891415	D	N	N	1546.93	1193.45	1398.91	1302.55	926.779	1748.52	1227.69	1278.99	1206.68	1317.86	1232.61	1326.36
ENSRNOG00000019178_Taf10	ENSRNOG00000019178	293345	Taf10	1	170585167	170586603	-0.00200776	0.991506	0.99829	D	N	N	797.828	382.707	501.157	481.45	466.253	780.772	531.809	721.506	440.739	678.164	583.689	436.445
ENSRNOG00000019212_Tpp1	ENSRNOG00000019212	83534	Tpp1	1	170588035	170594168	0.00312179	0.986054	0.998133	U	N	N	1630.17	1635.44	1901.87	917.047	1104.28	1216.36	2003.38	1272.89	1292.26	1294.78	1350.36	1209.51
ENSRNOG00000031643_Dchs1	ENSRNOG00000031643	308912	Dchs1	1	170594822	170628915	-0.0459406	0.848811	0.973469	D	N	N	485.193	495.165	711.175	207.185	220.856	306.145	439.875	608.089	290.974	335.235	205.858	437.219
ENSRNOG00000019497_Mrpl17	ENSRNOG00000019497	171061	Mrpl17	1	170652294	170653920	-0.11724	0.508941	0.888315	D	N	N	1232.27	843.001	1024.85	765.904	763.182	1606.75	956.362	1050.42	820.503	1151.89	825.975	861.283
ENSRNOG00000056562_Olfml1	ENSRNOG00000056562	361621	Olfml1	1	171793782	171818068	-0.12054	0.647086	0.928172	D	N	N	77.1437	201.379	252.381	56.8909	38.4454	53.4213	127.047	150.059	42.7902	47.2626	48.2878	160.185
ENSRNOG00000019667_Ppfibp2	ENSRNOG00000019667	308918	Ppfibp2	1	171797516	171969099	0.568355	0.0174568	0.330073	U	N	N	79.1738	125.535	164.949	172.371	137.422	339.019	365.18	390.852	336.973	168.167	176.208	334.298
ENSRNOG00000019751_Cyb5r2	ENSRNOG00000019751	365345	Cyb5r2	1	171971701	171979933	0.276759	0.284949	0.778907	U	N	N	2.0301	13.9483	25.2381	7.64206	12.2698	10.2733	8.93796	55.836	19.2556	12.0904	4.23577	17.0245
ENSRNOG00000031368_LOC499235	ENSRNOG00000031368	499235	LOC499235	1	171993857	171997902	0.032212	0.773828	0.9544	U	N	N	1098.28	1320.73	1184.39	1190.46	1024.94	1306.77	1290.9	1125.44	1005.57	1231.03	1495.23	1142.19
ENSRNOG00000045560_LOC499229	ENSRNOG00000045560	499229	Gvin1	1	173252058	173259702	0.229583	0.368528	0.824545	U	N	N	81.2039	234.506	166.752	324.363	650.3	61.6399	261.755	34.0251	116.603	803.465	752.273	335.072
ENSRNOG00000015082_Nlrp10	ENSRNOG00000015082	293426	Nlrp10	1	173520413	173528943	0.0699807	0.787324	0.957905	U	N	N	30.4514	5.23062	13.5204	10.1894	6.5439	10.2733	10.2148	2.61731	21.3951	26.3791	11.8602	10.0599
ENSRNOG00000015221_Eif3f	ENSRNOG00000015221	293427	Eif3f	1	173532803	173541847	-0.0552056	0.753508	0.949111	D	N	N	4638.77	3407.75	4662.75	2929.46	2278.09	3897.7	3403.45	4133.61	3001.73	4454.78	3032.81	2845.41
ENSRNOG00000014691_Ric3	ENSRNOG00000014691	687147	Ric3	1	173630761	173682226	-0.337829	0.201632	0.726541	D	N	N	4.06019	9.58946	13.5204	9.34029	3.27195	6.16399	6.38426	5.23463	4.27902	4.39652	3.38862	6.19071
ENSRNOG00000014629_Lmo1	ENSRNOG00000014629	245979	Lmo1	1	173728184	173764250	-0.366981	0.150813	0.676084	D	N	N	138.047	246.711	142.415	291.247	133.332	273.27	43.413	303.608	132.65	153.878	104.2	74.2885
ENSRNOG00000014214_Rpl27a	ENSRNOG00000014214	293418	Rpl27a	1	174132798	174135816	-0.380732	0.0598011	0.522553	D	N	N	18756.1	12400	17801.9	11400.3	7702.17	17107.1	9770.47	15070.5	8740.97	12165.2	8224.17	7745.36
ENSRNOG00000013934_St5	ENSRNOG00000013934	308944	St5	1	174137120	174289647	0.116837	0.553244	0.903791	U	N	N	550.156	833.411	614.729	658.066	561.957	776.663	515.848	1249.33	793.759	616.612	483.725	745.207
ENSRNOG00000013744_Akip1	ENSRNOG00000013744	361624	Akip1	1	174330695	174339494	-0.210596	0.351585	0.815961	D	N	N	87.2941	55.7932	63.0953	77.2697	61.349	123.28	36.3903	112.544	64.1853	56.0557	61.8422	50.2995
ENSRNOG00000013591_Tmem9b	ENSRNOG00000013591	293415	Tmem9b	1	174350597	174379566	0.0057024	0.976764	0.996345	U	N	N	231.431	103.741	169.456	95.1012	152.964	143.826	199.189	138.718	120.882	169.266	132.156	132.326
ENSRNOG00000013290_Nrip3	ENSRNOG00000013290	361625	Nrip3	1	174385424	174411141	0.0899266	0.725399	0.945853	U	N	N	26.3913	26.1531	15.3232	14.435	18.8137	14.3826	14.0454	44.4943	8.55805	20.8835	14.4016	24.7628
ENSRNOG00000013123_Scube2	ENSRNOG00000013123	499241	Scube2	1	174428699	174495258	-0.0198247	0.935904	0.98964	D	N	N	4.06019	13.0765	9.01362	4.24559	1.63597	0	3.19213	4.36219	6.41853	2.19826	1.69431	13.9291
ENSRNOG00000012206_Dennd5a	ENSRNOG00000012206	308942	Dennd5a	1	174524047	174588529	0.0694103	0.684882	0.940229	U	N	N	1232.27	798.541	1158.25	680.143	832.711	618.454	1013.18	1066.99	729.573	1058.46	881.887	866.7
ENSRNOG00000010752_Tmem41b	ENSRNOG00000010752	361626	Tmem41b	1	174605834	174620064	-0.360328	0.00662515	0.205895	D	N	N	387.748	244.095	322.688	288.7	265.028	322.582	278.354	226.834	193.626	237.412	231.273	220.544
ENSRNOG00000010427_Ipo7	ENSRNOG00000010427	308939	Ipo7	1	174655939	174696173	-0.260402	0.0611266	0.526993	D	N	N	1609.87	1624.11	1755.85	1300.85	1507.55	1454.7	1446.03	880.29	1069.76	1483.83	1268.19	1462.56
ENSRNOG00000010087_Zfp143	ENSRNOG00000010087	361627	Zfp143	1	174702373	174738126	0.11799	0.407096	0.845762	U	N	N	117.746	178.713	172.16	150.294	170.141	113.006	165.352	146.57	148.696	185.753	160.959	193.46
ENSRNOG00000010017_Wee1	ENSRNOG00000010017	308937	Wee1	1	174767960	174786361	-0.308625	0.118675	0.627569	D	N	N	373.538	258.915	340.715	407.576	772.998	421.206	367.733	289.649	344.461	291.27	331.237	366.8
ENSRNOG00000009910_Swap70	ENSRNOG00000009910	293410	Swap70	1	174862698	174924078	0.128695	0.336462	0.807148	U	N	N	785.647	571.009	795.001	655.519	843.345	556.814	743.766	636.88	785.201	932.063	791.242	747.529
ENSRNOG00000009812_Sbf2	ENSRNOG00000009812	691042	Sbf2	1	174948913	175420160	0.290177	0.0505745	0.497192	U	N	N	347.146	426.295	434.456	365.97	480.158	295.872	491.588	369.041	574.459	417.67	504.057	585.022
ENSRNOG00000027030_Adm	ENSRNOG00000027030	25026	Adm	1	175445088	175447259	0.3132	0.230868	0.745503	U	N	N	87.2941	48.8191	156.837	20.3788	36.8094	41.0933	165.352	77.647	59.9063	112.111	118.602	45.6565
ENSRNOG00000018262_Ampd3	ENSRNOG00000018262	25095	Ampd3	1	175586097	175630467	0.520311	0.0383737	0.453368	U	N	N	219.25	141.227	172.16	413.52	404.904	123.28	2560.09	116.907	271.718	139.59	537.943	223.639
ENSRNOG00000017900_rnf141	ENSRNOG00000017900	308900	rnf141	1	175634551	175657485	0.168839	0.434714	0.858155	U	N	N	164.438	120.304	168.555	78.9679	126.788	63.6946	206.212	98.5855	160.463	113.21	121.143	139.291
ENSRNOG00000026902_Lyve1	ENSRNOG00000026902	293186	Lyve1	1	175663266	175676699	-0.174702	0.504431	0.886667	D	N	N	426.32	141.227	590.392	186.806	58.0771	135.608	280.907	302.736	203.254	140.689	116.06	188.817
ENSRNOG00000017767_Mrvi1	ENSRNOG00000017767	308899	Mrvi1	1	175681960	175796040	-0.471265	0.0693397	0.541328	D	N	N	152.257	195.276	183.878	124.82	448.257	509.557	143.646	198.916	219.3	41.767	85.5626	223.639
ENSRNOG00000017195_Ctr9	ENSRNOG00000017195	293184	Ctr9	1	175839108	175869165	0.195652	0.210469	0.734035	U	N	N	556.246	885.718	735.511	937.426	1184.45	817.756	1119.8	800.025	1011.99	961.74	997.947	1067.12
ENSRNOG00000017158_Eif4g2	ENSRNOG00000017158	361628	Eif4g2	1	175883363	175895510	-0.0336376	0.737284	0.947157	D	N	N	9973.86	10938.1	10570.3	8708.55	9147.55	11066.4	11444.4	8692.1	8903.58	10248.3	9115.38	10544.3
ENSRNOG00000017021_Galnt18	ENSRNOG00000017021	293181	Galnt18	1	176296193	176607466	-0.0194191	0.937667	0.989916	D	N	N	95.4145	74.1004	100.051	89.1573	49.0792	166.428	77.2495	147.442	70.6039	50.56	49.9821	161.732
ENSRNOG00000026754_Usp47	ENSRNOG00000026754	308896	Usp47	1	176854653	176937763	0.143003	0.283639	0.778425	U	N	N	793.768	1059.2	951.838	1066.49	1332.5	906.107	1117.25	1063.5	1325.43	965.037	1050.47	1289.22
ENSRNOG00000016343_Dkk3	ENSRNOG00000016343	171548	Dkk3	1	176940693	176983045	0.244521	0.174902	0.702392	U	N	N	1181.52	1571.8	2032.57	1488.5	1559.9	867.068	1693.11	2478.6	1698.77	1443.16	1760.39	1525.24
ENSRNOG00000016244_Mical2	ENSRNOG00000016244	365352	Mical2	1	177048655	177173995	0.32462	0.160101	0.684602	U	N	N	200.98	128.15	169.456	107.838	208.587	78.0772	240.687	120.396	221.439	120.904	327.849	180.305
ENSRNOG00000016210_Micalcl	ENSRNOG00000016210	293180	Micalcl	1	177183209	177232691	0.477142	0.0696284	0.541328	U	N	N	4.06019	6.97415	7.2109	22.0771	10.6338	4.10933	16.5991	11.3417	22.4649	17.5861	25.4146	11.6076
ENSRNOG00000015713_Parva	ENSRNOG00000015713	57341	Parva	1	177249226	177408205	-0.124213	0.35249	0.817271	D	N	N	1831.15	2073.07	1920.8	1478.31	1231.07	1886.18	1766.52	1627.97	1557.56	1331.05	1496.07	1712.51
ENSRNOG00000015488_Tead1	ENSRNOG00000015488	361630	Tead1	1	177495782	177707061	0.0656016	0.73469	0.947134	U	N	N	81.2039	84.5616	81.1226	99.3468	104.702	80.1319	101.51	62.8155	113.394	53.8574	105.047	125.362
ENSRNOG00000014847_Rassf10	ENSRNOG00000014847	308894	Rassf10	1	177764445	177765968	0.32192	0.213943	0.735162	U	N	N	12.1806	37.4861	55.8844	30.5682	4.08994	53.4213	17.8759	105.565	63.1156	23.0817	22.8732	95.1822
ENSRNOG00000014448_Arntl	ENSRNOG00000014448	29657	Arntl	1	178039063	178137465	0.181543	0.382058	0.834061	U	N	N	127.896	106.356	156.837	138.406	125.152	45.2026	144.284	119.524	116.603	176.96	162.654	105.242
ENSRNOG00000014341_Btbd10	ENSRNOG00000014341	308890	Btbd10	1	178138565	178196294	-0.0641445	0.527001	0.895797	D	N	N	274.063	221.429	268.606	226.714	251.122	205.466	244.517	247.772	219.3	216.529	228.732	223.639
ENSRNOG00000013176_Far1	ENSRNOG00000013176	293173	Far1	1	178351680	178431395	-0.175808	0.37262	0.826882	D	N	N	621.21	417.577	563.351	419.464	575.045	373.949	637.787	248.645	326.275	534.178	384.608	432.576
ENSRNOG00000058003_Spon1	ENSRNOG00000058003	64456	Spon1	1	178636544	178935051	0.0615032	0.804789	0.962422	U	N	N	1080.01	2133.22	2697.78	607.119	1056.02	772.554	2029.56	1531.13	677.155	1586.05	1224.14	1856.44
ENSRNOG00000012258_Rras2	ENSRNOG00000012258	365355	Rras2	1	178940516	179010257	-0.0890641	0.608681	0.918029	D	N	N	483.163	301.632	398.402	351.535	315.743	376.003	349.857	205.023	287.764	415.471	423.577	386.92
ENSRNOG00000039241_Ythdc2	ENSRNOG00000039241	307446	Ythdc2	1	182085899	182140570	0.0846271	0.725075	0.945853	U	N	N	58.8728	117.689	52.279	121.424	138.24	32.8746	88.1028	71.5399	114.464	74.7409	93.1869	131.553
ENSRNOG00000025122_AABR07005506.1	ENSRNOG00000025122	NA	AABR07005506.1	1	183629450	183630695	-0.278146	0.2137	0.735162	D	N	N	401.959	195.276	257.79	143.501	128.424	299.981	176.844	224.216	140.138	253.899	168.584	137.743
ENSRNOG00000057623_Copb1	ENSRNOG00000057623	114023	Copb1	1	183695481	183729569	-0.0678373	0.499626	0.884801	D	N	N	1948.89	1576.16	1734.22	1592.1	1665.42	1999.19	1809.3	1456.97	1482.68	1835.55	1609.59	1800.72
ENSRNOG00000011745_Psma1	ENSRNOG00000011745	29668	Psma1	1	183733567	183744586	-0.192112	0.247664	0.75645	D	N	N	2062.58	1506.42	1609.83	1712.67	1394.67	2223.15	1435.82	1697.76	1183.15	2190.57	1289.37	1241.24
ENSRNOG00000011417_Pde3b	ENSRNOG00000011417	29516	Pde3b	1	183892841	184078071	0.300843	0.211624	0.734035	U	N	N	75.1136	84.5616	68.5035	29.7191	61.349	32.8746	115.555	53.2187	40.6507	113.21	75.3967	76.6101
ENSRNOG00000011367_Cyp2r1	ENSRNOG00000011367	361631	Cyp2r1	1	184093920	184106200	-0.18698	0.474073	0.872127	D	N	N	20.301	10.4612	23.4354	15.2841	9.81584	2.05466	9.57639	5.23463	11.7673	16.487	14.4016	8.51223
ENSRNOG00000011130_Calca	ENSRNOG00000011130	24241	Calca	1	184184020	184188911	-0.214063	0.315516	0.800796	D	N	N	10.1505	57.5368	62.194	52.6453	184.865	0	42.1361	6.10706	67.3946	3.29739	64.3837	0.773839
ENSRNOG00000011074_Calcb	ENSRNOG00000011074	171519	Calcb	1	184271590	184276475	0.149805	0.549057	0.902709	U	N	N	48.7223	7.84592	9.01362	43.305	37.6274	10.2733	39.5824	6.10706	31.0229	5.49565	109.283	19.346
ENSRNOG00000024712_Insc	ENSRNOG00000024712	293166	Insc	1	184299250	184407480	0.0990297	0.701896	0.943357	U	N	N	2.0301	10.4612	10.8163	12.7368	30.2655	18.492	11.4917	49.729	13.9068	3.29739	9.31869	13.9291
ENSRNOG00000020456_Nucb2	ENSRNOG00000020456	59295	Nucb2	1	185104656	185143272	-0.151947	0.497971	0.884698	D	N	N	436.471	537.882	716.583	384.65	341.101	1183.49	601.397	405.684	482.46	626.505	426.966	585.796
ENSRNOG00000020479_Pik3c2a	ENSRNOG00000020479	361632	Pik3c2a	1	185210922	185326314	-0.140445	0.411597	0.846959	D	N	N	343.086	502.139	427.246	450.032	458.073	439.698	483.927	273.945	407.577	268.188	377.831	535.497
ENSRNOG00000051825_AABR07005535.1	ENSRNOG00000051825	NA	AABR07005535.1	1	185353166	185356627	-0.186194	0.433738	0.857287	D	N	N	10.1505	18.3072	15.3232	21.2279	16.3597	26.7106	12.1301	12.2141	25.6741	15.3878	11.013	14.7029
ENSRNOG00000024602_Plekha7	ENSRNOG00000024602	499249	Plekha7	1	185356975	185538694	0.275144	0.266974	0.77118	U	N	N	58.8728	217.071	86.5307	234.356	245.396	84.2412	152.584	130.866	255.672	195.645	269.395	236.795
ENSRNOG00000053659_RGD1311703	ENSRNOG00000053659	293160	RGD1311703	1	185558036	185569190	-0.186911	0.114486	0.618393	D	N	N	1090.16	1016.48	1089.75	904.31	914.509	1243.07	1008.71	978.875	739.201	1036.48	794.63	887.593
ENSRNOG00000030807_AABR07005549.1	ENSRNOG00000030807	NA	LOC100912427	1	186640425	186641393	0.330165	0.189096	0.715287	U	N	N	44.6621	55.7932	33.3504	27.1718	80.9807	115.061	51.7125	95.0957	86.6502	146.184	79.6325	47.2042
ENSRNOG00000056658_Xylt1	ENSRNOG00000056658	64133	Xylt1	1	187149453	187261632	0.295859	0.245722	0.756019	U	N	N	32.4815	37.4861	35.1531	15.2841	32.7195	8.21865	31.9213	21.8109	31.0229	51.6592	23.7203	66.5502
ENSRNOG00000061992_Rn60_1_1877.1	ENSRNOG00000061992	NA	AABR07005564.1	1	187679743	187680412	0.0194399	0.940517	0.990358	U	N	N	10.1505	5.23062	9.91498	7.64206	2.45396	14.3826	4.46898	6.10706	6.41853	8.79305	9.31869	13.1553
ENSRNOG00000018320_Rps15a	ENSRNOG00000018320	117053	Rps15a	1	187759480	187766709	-0.287096	0.167613	0.695441	D	N	N	14533.5	10166.6	15669.3	8627.88	5997.48	13275.2	8339.76	12820.5	7424.1	11106.7	7014.44	6623.29
ENSRNOG00000017751_Arl6ip1	ENSRNOG00000017751	293551	Arl6ip1	1	187770160	187779675	-0.32526	0.0487933	0.492151	D	N	N	3140.56	1734.82	2493.17	1735.6	1660.51	2558.06	1848.24	2025.8	1427.05	1803.67	1492.69	1730.3
ENSRNOG00000047386_Smg1	ENSRNOG00000047386	691397	Smg1	1	187784270	187883157	-0.104714	0.690528	0.941325	D	N	N	278.123	1101.04	462.399	2629.72	1937.81	489.01	655.025	481.586	1632.45	557.259	1417.29	1242.01
ENSRNOG00000057326_AABR07005569.1	ENSRNOG00000057326	NA	AABR07005569.1	1	187973557	187975053	-0.321751	0.17487	0.702392	D	N	N	28.4214	73.2286	49.5749	112.933	90.7966	59.5852	33.1981	62.8155	71.6736	35.1722	57.6065	47.978
ENSRNOG00000017136_Syt17	ENSRNOG00000017136	192189	Syt17	1	188034495	188101566	-0.0414089	0.871012	0.978085	D	N	N	36.5417	37.4861	31.5477	14.435	36.8094	10.2733	18.5144	22.6834	44.9297	41.767	15.2488	19.346
ENSRNOG00000036762_Itpripl2	ENSRNOG00000036762	499253	Itpripl2	1	188141113	188142721	0.352656	0.135294	0.655317	U	N	N	71.0534	74.1004	58.5885	49.2488	112.882	43.1479	125.77	44.4943	125.161	59.3531	123.684	98.2776
ENSRNOG00000017012_Coq7	ENSRNOG00000017012	25249	Coq7	1	188174874	188190860	-0.294677	0.204783	0.730691	D	N	N	302.484	161.277	144.218	185.108	210.223	454.081	131.516	305.353	160.463	178.059	132.156	188.817
ENSRNOG00000016679_Tmc7	ENSRNOG00000016679	499254	Tmc7	1	188195416	188245628	0.0756529	0.767902	0.953288	U	N	N	64.9631	24.4095	42.364	18.6806	31.0835	14.3826	33.1981	13.0866	23.5346	45.0644	50.8292	45.6565
ENSRNOG00000050445_Gde1	ENSRNOG00000050445	60418	Gde1	1	188394814	188407132	-0.0104665	0.950041	0.99127	D	N	N	487.223	364.4	390.29	239.451	552.141	336.965	409.869	435.346	387.252	389.092	363.429	364.478
ENSRNOG00000027405_Ccp110	ENSRNOG00000027405	361634	Ccp110	1	188420461	188444991	-0.00648516	0.972133	0.995755	D	N	N	79.1738	111.586	79.3198	140.954	139.058	82.1865	88.1028	87.2438	99.4873	102.219	129.615	130.005
ENSRNOG00000016063_LOC361635	ENSRNOG00000016063	361635	Vps35l	1	188448478	188552272	0.0136699	0.922386	0.988619	U	N	N	759.256	543.984	617.433	431.352	548.051	528.049	702.269	549.636	519.901	635.298	492.197	554.069
ENSRNOG00000046147_Knop1	ENSRNOG00000046147	NA	Knop1	1	188556352	188572141	0.260941	0.243731	0.754835	U	N	N	30.4514	58.4085	43.2654	58.5891	91.6145	53.4213	62.5657	44.4943	98.4175	57.1548	72.0081	96.7299
ENSRNOG00000036758_Iqck	ENSRNOG00000036758	100909537	Iqck	1	188571953	188688700	-0.132766	0.614432	0.918914	D	N	N	2.0301	6.10239	9.91498	6.79294	8.99786	6.16399	4.46898	10.4693	5.34878	5.49565	5.93008	3.8692
ENSRNOG00000016013_Gprc5b	ENSRNOG00000016013	293546	Gprc5b	1	188688743	188713280	0.271938	0.26058	0.766609	U	N	N	140.077	268.505	295.647	343.893	250.304	108.897	201.743	584.533	313.438	168.167	316.836	266.974
ENSRNOG00000057396_AABR07005581.1	ENSRNOG00000057396	NA	AABR07005581.1	1	189009019	189014540	-0.676144	0.0061008	0.198814	D	N	N	4.06019	11.333	2.70409	4.24559	13.0878	20.5466	3.19213	0	1.06976	2.19826	1.69431	4.64303
ENSRNOG00000015716_Gp2	ENSRNOG00000015716	171459	Gp2	1	189166399	189182306	-0.376891	0.150091	0.674987	D	N	N	7602.71	15815.6	9921.29	7591.96	13159	4814.08	13246.7	456.285	5487.85	2421.39	3823.21	8595.03
ENSRNOG00000014946_Thumpd1	ENSRNOG00000014946	NA	AABR07005588.1	1	189457583	189460844	0.0536541	0.767005	0.953108	U	N	N	832.34	723.569	620.137	1023.19	1301.42	657.492	1106.39	959.682	873.99	624.306	920.856	903.844
ENSRNOG00000032246_Acsm3	ENSRNOG00000032246	24763	Acsm3	1	189514553	189541224	0.0242814	0.902109	0.983367	U	N	N	22.3311	20.0507	52.279	161.332	1141.91	98.6239	280.907	1142.02	119.813	6.59479	60.1479	44.1088
ENSRNOG00000014673_Eri2	ENSRNOG00000014673	691484	Eri2	1	189540145	189549891	-0.226863	0.364004	0.822561	D	N	N	109.625	97.6382	64.8981	164.729	255.212	125.334	105.34	205.023	81.3014	48.3618	86.4097	117.624
ENSRNOG00000014513_Exnef	ENSRNOG00000014513	309036	Rexo5	1	189549960	189622094	-0.0135811	0.958739	0.993254	D	N	N	87.2941	86.3052	23.4354	314.174	117.79	73.9679	236.856	98.5855	112.324	18.6852	127.073	95.956
ENSRNOG00000014037_Dcun1d3	ENSRNOG00000014037	309035	Dcun1d3	1	189627972	189666440	0.109483	0.537712	0.900376	U	N	N	44.6621	59.2803	78.4185	43.305	58.8951	57.5306	70.8653	73.2848	65.2551	46.1635	60.1479	59.5856
ENSRNOG00000024530_Lyrm1	ENSRNOG00000024530	365361	Lyrm1	1	189665976	189685842	-0.372151	0.0469531	0.485699	D	N	N	91.3543	52.3062	83.8267	72.175	64.621	90.4052	63.8426	75.0296	42.7902	42.8661	57.6065	47.2042
ENSRNOG00000048250_Tmem159	ENSRNOG00000048250	378467	Tmem159	1	189870622	189889484	-0.129048	0.456708	0.866047	D	N	N	718.654	489.063	801.311	686.087	510.424	567.087	596.29	362.934	715.667	622.108	653.156	456.565
ENSRNOG00000046181_Anks4b	ENSRNOG00000046181	687561	Anks4b	1	189940291	189942112	0.00046434	0.998594	0.999657	U	N	N	0	10.4612	11.7177	21.2279	4.90792	8.21865	7.02269	4.36219	11.7673	8.79305	17.7902	9.28607
ENSRNOG00000061215_Crym	ENSRNOG00000061215	117024	Crym	1	189944895	189960073	0.246305	0.264114	0.769062	U	N	N	121.806	101.125	156.837	123.122	85.8886	90.4052	229.833	177.977	132.65	124.202	115.213	67.324
ENSRNOG00000061844_AABR07005618.1	ENSRNOG00000061844	NA	AABR07005618.1	1	190368884	190370499	0.364773	0.086891	0.57291	U	N	N	44.6621	47.9473	45.0681	36.5121	69.5289	30.82	82.3569	38.3873	64.1853	47.2626	72.0081	76.6101
ENSRNOG00000036742_Uqcrc2	ENSRNOG00000036742	293448	Uqcrc2	1	190555177	190585734	-0.242699	0.0832122	0.570203	D	N	N	2596.49	1923.12	2402.13	1685.5	1508.37	2369.03	1778.02	1857.42	1549.01	1833.35	1528.27	1846.38
ENSRNOG00000016292_Pdzd9	ENSRNOG00000016292	308954	Pdzd9	1	190584883	190598122	-0.711005	0.00639482	0.201787	D	N	N	6.09029	18.3072	7.2109	21.2279	16.3597	14.3826	8.29954	6.9795	7.48829	4.39652	5.08292	4.64303
ENSRNOG00000061899_LOC102547219	ENSRNOG00000061899	102547219	Mosmo	1	190666149	190671228	-0.121972	0.643017	0.927017	D	N	N	14.2107	8.71769	9.91498	5.94382	14.7238	2.05466	10.2148	6.9795	9.6278	2.19826	9.31869	9.28607
ENSRNOG00000016448_Eef2k	ENSRNOG00000016448	25435	Eef2k	1	190780236	190842324	0.0843226	0.662238	0.931445	U	N	N	468.952	645.109	634.559	615.61	444.985	916.38	521.594	590.64	937.106	563.854	496.432	881.403
ENSRNOG00000016960_Polr3e	ENSRNOG00000016960	361640	Polr3e	1	190852985	190881108	0.125042	0.339955	0.80959	U	N	N	213.16	294.658	260.494	343.044	343.555	283.544	298.783	271.328	356.229	358.317	323.613	314.179
ENSRNOG00000017260_Cdr2	ENSRNOG00000017260	308958	Cdr2	1	190889701	190914610	-0.124577	0.444	0.862269	D	N	N	148.197	142.098	171.259	170.673	155.418	209.576	122.578	116.034	207.533	124.202	163.501	169.471
ENSRNOG00000017330_AC103221.1	ENSRNOG00000017330	NA	AC103221.1	1	190964507	190965115	0.0796434	0.721572	0.945853	U	N	N	32.4815	16.5636	25.2381	17.8315	22.9036	32.8746	26.8139	37.5148	19.2556	28.5774	18.6374	22.4413
ENSRNOG00000025940_Mettl9	ENSRNOG00000025940	100302453	Mettl9	1	190964885	191009926	-0.503029	0.00798634	0.221845	D	N	N	1756.03	990.33	1306.97	928.086	747.64	1432.1	836.338	971.023	601.203	897.99	602.327	826.46
ENSRNOG00000017277_Igsf6	ENSRNOG00000017277	171064	Igsf6	1	190997029	191007503	0.449744	0.0682698	0.540317	U	N	N	60.9029	87.1769	80.2212	54.3435	62.167	36.9839	98.3176	42.7494	70.6039	186.852	149.946	62.681
ENSRNOG00000025793_Usp31	ENSRNOG00000025793	308959	Usp31	1	191615146	191676915	0.169942	0.466612	0.870228	U	N	N	48.7223	101.125	93.7416	93.4029	89.9786	30.82	86.8259	61.9431	126.231	52.7583	114.366	103.694
ENSRNOG00000017842_Scnn1g	ENSRNOG00000017842	24768	Scnn1g	1	191704311	191738268	0.0641514	0.795456	0.96022	U	N	N	69.0233	182.2	195.596	314.174	303.473	180.81	112.363	231.196	282.415	331.938	117.754	261.558
ENSRNOG00000030981_Scnn1b	ENSRNOG00000030981	24767	Scnn1b	1	191829555	191884298	0.0969032	0.687057	0.940229	U	N	N	235.491	264.146	460.596	431.352	620.034	523.939	284.1	420.515	763.806	479.221	198.234	646.929
ENSRNOG00000060008_Cog7	ENSRNOG00000060008	293456	Cog7	1	191857556	191948977	0.132882	0.168756	0.696796	U	N	N	251.732	286.812	279.422	297.191	298.565	371.894	337.089	327.164	340.182	315.451	332.084	304.893
ENSRNOG00000018599_Gga2	ENSRNOG00000018599	293455	Gga2	1	191951581	191984858	-0.046054	0.830337	0.969751	D	N	N	1006.93	410.603	893.25	404.18	485.884	852.685	649.279	446.688	614.04	834.24	566.746	773.839
ENSRNOG00000025353_Ears2	ENSRNOG00000025353	685245	Ears2	1	191997512	192025350	0.0732818	0.647933	0.928281	U	N	N	56.8427	58.4085	56.7858	72.175	81.7987	63.6946	71.5037	68.0501	82.3712	78.0383	54.2179	63.4548
ENSRNOG00000018243_Ubfd1	ENSRNOG00000018243	293454	Ubfd1	1	192025357	192037025	-0.0718445	0.595132	0.913331	D	N	N	231.431	149.944	210.919	190.202	188.137	221.904	182.59	156.166	231.067	176.96	197.387	177.983
ENSRNOG00000018129_Ndufab1	ENSRNOG00000018129	293453	Ndufab1	1	192044216	192057612	-0.3479	0.0801148	0.563158	D	N	N	694.293	350.451	458.793	466.166	406.54	865.013	350.496	517.356	334.834	495.708	332.084	382.276
ENSRNOG00000025126_Palb2	ENSRNOG00000025126	293452	Palb2	1	192064589	192088520	-0.00485076	0.983245	0.998089	D	N	N	30.4514	50.5626	29.7449	64.5329	50.7152	65.7492	21.0681	43.6219	51.3483	60.4522	55.9122	59.5856
ENSRNOG00000018048_Dctn5	ENSRNOG00000018048	308961	Dctn5	1	192088672	192105429	-0.12181	0.247488	0.75645	D	N	N	468.952	382.707	446.174	445.787	440.895	476.682	412.423	455.412	353.019	468.23	350.722	390.015
ENSRNOG00000018815_Plk1	ENSRNOG00000018815	25515	Plk1	1	192115966	192125989	-0.0604033	0.817231	0.965677	D	N	N	369.478	158.662	76.6158	144.35	169.323	396.55	47.8819	331.526	113.394	233.016	188.068	300.25
ENSRNOG00000019112_Chp2	ENSRNOG00000019112	308965	Chp2	1	192169841	192173253	-0.295028	0.228464	0.744744	D	N	N	190.829	168.251	274.014	92.5538	82.6167	61.6399	164.075	98.5855	70.6039	111.012	108.436	92.0868
ENSRNOG00000012061_Prkcb	ENSRNOG00000012061	25023	Prkcb	1	192233910	192574831	0.26645	0.308944	0.79706	U	N	N	38.5718	23.5378	54.0817	22.0771	40.0814	8.21865	35.7519	13.0866	24.6044	68.1461	71.1609	50.2995
ENSRNOG00000012806_Rbbp6	ENSRNOG00000012806	308968	Rbbp6	1	192933540	192965158	0.0327587	0.892117	0.983317	U	N	N	209.1	523.933	282.126	974.787	751.73	359.566	351.773	471.116	627.947	511.096	651.461	597.404
ENSRNOG00000024737_Tnrc6a	ENSRNOG00000024737	308971	Tnrc6a	1	193076430	193146394	-0.0639086	0.763492	0.951733	D	N	N	324.815	611.11	369.558	873.742	642.938	419.151	358.157	530.442	676.086	371.506	602.327	534.723
ENSRNOG00000013836_Arhgap17	ENSRNOG00000013836	63994	Arhgap17	1	193239040	193328371	0.188643	0.210326	0.734035	U	N	N	440.531	534.395	531.804	568.06	511.242	388.331	579.691	412.663	529.529	779.284	628.588	516.924
ENSRNOG00000014565_Lcmt1	ENSRNOG00000014565	361643	Lcmt1	1	193335645	193391638	-0.0130493	0.936037	0.98964	D	N	N	432.411	380.963	422.739	478.053	435.169	466.409	679.924	423.132	412.926	323.144	382.066	362.931
ENSRNOG00000019206_Nupr1	ENSRNOG00000019206	100912108	Nupr1l1	1	194767474	194769524	0.264669	0.309335	0.797324	U	N	N	166.468	543.112	617.433	329.458	205.315	852.685	1361.76	728.486	554.133	226.421	463.393	410.135
ENSRNOG00000054391_Snurf	ENSRNOG00000054391	113938	Snurf	1	195074330	195096694	0.321425	0.212152	0.73434	U	N	N	77.1437	13.9483	25.2381	6.79294	19.6317	43.1479	12.7685	89.8611	27.8136	79.1374	19.4845	79.7054
ENSRNOG00000059764_Snrpn	ENSRNOG00000059764	81781	Snrpn	1	195074330	195096460	0.47785	0.0529309	0.505726	U	N	N	28.4214	15.6918	15.3232	3.39647	24.5396	86.2959	15.9606	108.182	47.0692	157.176	12.7073	95.956
ENSRNOG00000015180_Kdm8	ENSRNOG00000015180	308976	Kdm8	1	196839321	196854180	0.0301547	0.858507	0.975358	U	N	N	97.4446	123.791	103.657	150.294	141.512	92.4599	88.7412	158.784	127.301	111.012	133.003	116.85
ENSRNOG00000015218_Nsmce1	ENSRNOG00000015218	361645	Nsmce1	1	196857461	196884302	-0.158941	0.402537	0.843579	D	N	N	432.411	279.838	323.589	307.381	256.03	610.235	303.891	389.107	259.951	378.101	289.727	307.214
ENSRNOG00000015441_Il4r	ENSRNOG00000015441	25084	Il4r	1	196942364	196967220	0.431705	0.0455915	0.481303	U	N	N	535.945	516.959	511.974	524.755	535.781	419.151	1124.27	385.617	543.436	967.235	1009.81	427.159
ENSRNOG00000015773_Il21r	ENSRNOG00000015773	308977	Il21r	1	196996581	197024166	0.161996	0.537549	0.900376	U	N	N	180.679	133.381	186.582	159.634	212.677	45.2026	171.098	34.0251	63.1156	449.545	341.403	103.694
ENSRNOG00000016218_Gtf3c1	ENSRNOG00000016218	171063	Gtf3c1	1	197032474	197098649	0.275861	0.135594	0.656108	U	N	N	726.775	937.152	722.892	1370.48	1382.4	805.428	1069.36	903.845	1407.8	1259.6	1534.2	1269.87
ENSRNOG00000016635_LOC361646	ENSRNOG00000016635	361646	LOC361646	1	197098603	197265840	0.142983	0.489369	0.879962	U	N	N	101.505	178.713	111.769	205.486	218.403	106.843	150.03	142.207	238.556	135.193	218.566	167.923
ENSRNOG00000016722_Xpo6	ENSRNOG00000016722	293476	Xpo6	1	197500514	197590277	0.351483	0.0230496	0.37168	U	N	N	1069.86	819.463	887.841	799.869	978.312	860.904	1707.79	875.055	1142.5	1314.56	1071.65	972.716
ENSRNOG00000057696_LOC103690016	ENSRNOG00000057696	113907	Sbk1	1	197659187	197681006	0.0787275	0.436284	0.859379	U	N	N	0	0	0	0	143.966	0	114.278	0	59.9063	119.805	133.003	84.3485
ENSRNOG00000017429_Lat	ENSRNOG00000017429	81511	Lat	1	197765644	197770669	-0.0463327	0.859486	0.975481	D	N	N	253.762	148.201	207.313	212.279	302.655	32.8746	204.935	64.5604	27.8136	349.524	346.486	85.1223
ENSRNOG00000017621_Spns1	ENSRNOG00000017621	361648	Spns1	1	197771108	197778490	-0.0112049	0.924972	0.989268	D	N	N	304.514	265.89	284.83	271.718	239.67	291.762	243.24	316.695	319.857	282.477	225.343	253.045
ENSRNOG00000057384_Nfatc2ip	ENSRNOG00000057384	308983	Nfatc2ip	1	197785968	197801634	0.0230922	0.916556	0.987103	U	N	N	79.1738	47.9473	51.3776	21.2279	49.0792	26.7106	47.2435	43.6219	50.2785	41.767	47.4406	47.978
ENSRNOG00000018462_Rabep2	ENSRNOG00000018462	80754	Rabep2	1	197839430	197856312	0.267593	0.28593	0.779214	U	N	N	328.876	192.661	144.218	283.605	262.574	250.669	176.206	212.875	840.828	228.619	276.172	210.484
ENSRNOG00000047124_Atp2a1	ENSRNOG00000047124	NA	AABR07005775.1	1	197856903	197858016	0.195553	NA	NA	U	NA	NA	503.464	16.5636	18.9286	29.7191	18.8137	76.0226	14.0454	29.6629	1974.77	15.3878	15.2488	13.9291
ENSRNOG00000049181_Sh2b1	ENSRNOG00000049181	89817	Sh2b1	1	197878840	197886759	0.105388	0.583231	0.910405	U	N	N	272.033	481.217	412.824	702.22	543.143	503.393	411.146	517.356	743.48	411.075	578.606	525.437
ENSRNOG00000018604_Tufm	ENSRNOG00000018604	293481	Tufm	1	197903582	197907189	-0.0714903	0.627702	0.922668	D	N	N	1017.08	998.176	925.699	1080.08	988.946	1471.14	964.662	1393.28	955.292	1082.64	869.18	865.926
ENSRNOG00000018686_Atxn2l	ENSRNOG00000018686	361649	Atxn2l	1	197908094	197919560	0.0242094	0.90146	0.983317	U	N	N	927.754	1175.15	770.664	1659.18	1588.53	924.599	919.333	933.508	1513.7	1067.26	1586.72	1176.24
ENSRNOG00000018761_Eif3c	ENSRNOG00000018761	293484	Eif3c	1	197964407	197982601	0.180893	0.15743	0.683972	U	N	N	2905.07	2170.71	2295.77	2008.16	2314.09	2654.63	3266.19	2248.27	2491.46	3246.83	2649.9	2484.02
ENSRNOG00000019103_Cln3	ENSRNOG00000019103	293485	Cln3	1	197986385	197997664	-0.0260243	0.824735	0.967875	D	N	N	247.672	244.095	228.946	189.353	202.043	205.466	239.41	225.961	234.276	206.637	206.706	176.435
ENSRNOG00000017403_Apobr	ENSRNOG00000017403	499264	Apobr	1	197999037	198003839	-0.198815	0.430896	0.855178	D	N	N	117.746	286.812	171.259	117.178	168.505	441.753	137.9	68.9226	128.371	253.899	209.247	249.95
ENSRNOG00000019245_Sgf29	ENSRNOG00000019245	293488	Sgf29	1	198067066	198100493	-0.0498663	0.736126	0.947157	D	N	N	152.257	125.535	121.684	146.897	145.602	145.881	111.086	161.401	146.557	165.969	115.213	106.79
ENSRNOG00000019342_Sult1a1	ENSRNOG00000019342	83783	Sult1a1	1	198100586	198104109	-0.198868	0.446996	0.862269	D	N	N	30.4514	206.609	165.851	39.9085	21.2677	43.1479	101.51	95.0957	60.9761	35.1722	18.6374	61.9071
ENSRNOG00000019369_Slx1b	ENSRNOG00000019369	293489	Slx1b	1	198112245	198120061	-0.121804	0.480464	0.874038	D	N	N	227.371	295.53	297.449	370.215	281.388	308.2	255.37	378.638	339.113	185.753	220.26	241.438
ENSRNOG00000047988_Bola2	ENSRNOG00000047988	502367	Bola2	1	198120099	198121158	-0.402347	0.0701504	0.541521	D	N	N	911.513	473.371	716.583	663.161	396.724	1319.09	485.842	801.77	418.274	511.096	469.323	421.742
ENSRNOG00000019430_Coro1a	ENSRNOG00000019430	155151	Coro1a	1	198123884	198128857	0.00789158	0.976061	0.996067	U	N	N	3185.22	1040.89	1978.49	1195.56	1514.91	493.119	1618.41	455.412	434.321	3918.4	2179.73	906.939
ENSRNOG00000056571_AABR07005779.4	ENSRNOG00000056571	NA	AABR07005779.7	1	198162429	198168448	-0.0136641	0.957794	0.993061	D	N	N	8.12039	6.10239	7.2109	4.24559	11.4518	2.05466	7.02269	1.74488	3.20927	7.69392	16.9431	2.32152
ENSRNOG00000053583_Mapk3	ENSRNOG00000053583	50689	Mapk3	1	198192773	198198975	0.0286436	0.869379	0.977533	U	N	N	1258.66	1654.62	1511.58	1193.01	967.679	1758.79	1197.05	2036.27	1595.01	1132.1	1148.74	1423.09
ENSRNOG00000019721_Ypel3	ENSRNOG00000019721	293491	Ypel3	1	198210525	198213816	-0.0422202	0.81606	0.965493	D	N	N	406.019	650.34	660.698	636.838	437.623	380.113	432.853	696.205	588.366	368.209	528.624	460.434
ENSRNOG00000019813_Ppp4c	ENSRNOG00000019813	171366	Ppp4c	1	198219054	198225580	-0.0352225	0.803049	0.962185	D	N	N	907.453	593.675	657.994	620.705	600.402	739.679	630.765	751.169	586.226	819.952	688.736	523.889
ENSRNOG00000052802_Aldoa	ENSRNOG00000052802	24189	Aldoa	1	198228387	198233588	-0.00176822	0.993067	0.998479	D	N	N	11394.9	5667.37	6358.21	8030.95	6137.36	10242.5	8003.95	5432.67	12260.5	8941.43	7619.3	5494.26
ENSRNOG00000019960_Ino80e	ENSRNOG00000019960	293494	Ino80e	1	198287490	198298076	-0.071485	0.500129	0.884801	D	N	N	406.019	316.452	363.249	315.872	341.101	349.293	303.891	361.189	358.368	344.028	338.862	273.939
ENSRNOG00000029061_Hirip3	ENSRNOG00000029061	361650	Hirip3	1	198298138	198301161	0.125748	0.494232	0.883434	U	N	N	217.22	271.12	168.555	348.138	270.754	359.566	201.743	350.72	321.996	355.019	274.478	306.44
ENSRNOG00000019964_Taok2	ENSRNOG00000019964	64666	Taok2	1	198301938	198320075	0.0978003	0.647737	0.928281	U	N	N	393.839	729.671	511.974	1046.96	900.604	702.695	579.691	646.476	1099.71	505.6	875.957	968.073
ENSRNOG00000020000_Tmem219	ENSRNOG00000020000	NA	AABR07005779.2	1	198324857	198354466	-0.079948	0.550302	0.902978	D	N	N	170.528	119.432	133.402	115.48	121.88	135.608	132.793	134.355	106.976	139.59	121.143	105.242
ENSRNOG00000020010_Kctd13	ENSRNOG00000020010	293497	Kctd13	1	198360627	198378934	0.0935351	0.480705	0.874038	U	N	N	95.4145	87.1769	86.5307	110.385	90.7966	88.3505	100.233	108.182	115.534	102.219	89.7983	85.8961
ENSRNOG00000027098_Sez6l2	ENSRNOG00000027098	308988	Sez6l2	1	198383201	198403544	-0.314511	0.225523	0.744279	D	N	N	4.06019	11.333	7.2109	11.8876	17.9957	24.656	6.38426	21.8109	2.13951	5.49565	6.77723	3.09536
ENSRNOG00000024144_Cdipt	ENSRNOG00000024144	192260	Cdipt	1	198409360	198413497	-0.040302	0.744866	0.947826	D	N	N	952.115	686.082	890.546	685.238	798.355	704.75	853.575	898.611	673.946	746.31	754.814	645.382
ENSRNOG00000020182_Mvp	ENSRNOG00000020182	64681	Mvp	1	198420806	198450047	0.185834	0.385029	0.83489	U	N	N	2241.23	1641.54	1740.53	1672.76	1560.72	1388.95	2055.09	1261.54	1494.45	3963.47	1871.36	1412.26
ENSRNOG00000020217_Pagr1	ENSRNOG00000020217	293500	Pagr1	1	198449040	198450688	0.059412	0.76704	0.953108	U	N	N	87.2941	54.0497	91.9389	93.4029	78.5268	92.4599	67.6731	142.207	74.8829	86.8313	88.104	61.9071
ENSRNOG00000029366_Prrt2	ENSRNOG00000029366	361651	Prrt2	1	198451324	198454914	-0.169803	0.477248	0.873379	D	N	N	4.06019	6.10239	4.50681	22.9262	34.3555	2.05466	0.638426	4.36219	14.9766	2.19826	15.2488	13.1553
ENSRNOG00000055082_Maz	ENSRNOG00000055082	691842	Maz	1	198456699	198460126	0.158593	0.29175	0.784629	U	N	N	442.561	305.119	298.351	241.999	339.465	306.145	266.224	386.49	395.81	405.579	338.014	382.276
ENSRNOG00000020281_Kif22	ENSRNOG00000020281	293502	Kif22	1	198461169	198476476	-0.0921625	0.723738	0.945853	D	N	N	381.658	169.995	95.5444	209.732	201.225	581.47	60.6505	420.515	182.928	248.404	222.802	323.465
ENSRNOG00000016978_LOC308990	ENSRNOG00000016978	308990	LOC308990	1	198528635	198531201	-0.0767743	0.77047	0.953981	D	N	N	164.438	104.612	167.653	128.217	217.585	41.0933	164.075	32.2802	31.0229	216.529	218.566	80.4793
ENSRNOG00000016980_Qprt	ENSRNOG00000016980	293504	Qprt	1	198544262	198559568	-0.430308	0.0941489	0.588236	D	N	N	215.19	102.869	238.861	188.504	145.602	78.0772	122.578	84.6265	16.0463	139.59	136.392	92.0868
ENSRNOG00000036711_Spn	ENSRNOG00000036711	24796	Spn	1	198572999	198577226	0.204997	0.434458	0.858033	U	N	N	401.959	289.427	359.643	270.869	538.235	82.1865	434.768	143.952	131.58	856.223	665.016	303.345
ENSRNOG00000017201_Cd2bp2	ENSRNOG00000017201	293505	Cd2bp2	1	198635447	198638944	0.0627516	0.556919	0.90404	U	N	N	673.992	809.874	762.552	910.254	891.606	772.554	790.371	1017.26	855.805	833.141	827.67	735.921
ENSRNOG00000017349_Tbc1d10b	ENSRNOG00000017349	365372	Tbc1d10b	1	198641018	198652674	0.0325943	0.716641	0.945853	U	N	N	676.022	599.777	680.528	589.288	654.39	659.547	605.866	754.659	716.736	616.612	654.003	598.178
ENSRNOG00000017645_Mylpf	ENSRNOG00000017645	24584	Mylpf	1	198655742	198658583	0.186455	NA	NA	U	NA	NA	562.337	10.4612	5.40817	6.79294	8.17987	65.7492	7.66111	9.59682	3620.05	10.9913	4.23577	3.8692
ENSRNOG00000017804_Sept1	ENSRNOG00000017804	293507	Sept1	1	198658745	198662610	0.166392	0.519806	0.892449	U	N	N	146.167	149.073	207.313	151.143	234.762	53.4213	215.788	79.3918	80.2317	333.037	327.849	111.433
ENSRNOG00000017837_Znf48	ENSRNOG00000017837	103690203	Znf48	1	198682230	198684398	0.380182	0.00688152	0.206879	U	N	N	146.167	159.534	120.782	120.575	166.051	133.553	184.505	217.237	222.509	180.257	147.405	177.209
ENSRNOG00000043225_Zfp771	ENSRNOG00000043225	308992	Zfp771	1	198690794	198700969	0.364914	0.0666457	0.53857	U	N	N	77.1437	104.612	87.4321	164.729	146.42	164.373	115.555	229.451	182.928	170.365	156.723	158.637
ENSRNOG00000017850_Dctpp1	ENSRNOG00000017850	192252	Dctpp1	1	198703461	198706852	-0.364967	0.154804	0.682122	D	N	N	373.538	130.765	110.868	118.027	90.7966	351.347	62.5657	198.043	105.906	197.844	94.8813	109.885
ENSRNOG00000048397_Sephs2	ENSRNOG00000048397	308993	Sephs2	1	198719162	198721476	0.0498168	0.789622	0.95857	U	N	N	515.645	383.578	413.725	211.43	271.572	334.91	390.717	307.098	336.973	496.807	322.766	358.287
ENSRNOG00000017980_Itgal	ENSRNOG00000017980	308995	Itgal	1	198744050	198781750	0.333787	0.202979	0.72962	U	N	N	860.761	451.577	607.518	226.714	570.955	193.138	748.235	148.314	283.485	2146.6	907.302	475.137
ENSRNOG00000029490_Znf768	ENSRNOG00000029490	102553763	Znf768	1	198792573	198794947	0.131855	0.448306	0.862269	U	N	N	85.2641	149.944	109.966	188.504	161.143	147.936	129.6	176.232	192.556	139.59	148.252	157.863
ENSRNOG00000046480_Zfp764	ENSRNOG00000046480	102553962	AABR07005779.3	1	198829722	198831691	-0.0805952	0.698663	0.942385	D	N	N	22.3311	27.8966	19.83	19.5297	32.7195	30.82	21.0681	24.4283	19.2556	21.9826	29.6504	25.5367
ENSRNOG00000031003_LOC102553866	ENSRNOG00000031003	102553866	Zfp764	1	198834989	198839228	-0.00289408	0.986171	0.998133	D	N	N	83.234	125.535	140.612	102.743	86.7066	92.4599	114.278	122.141	112.324	80.2366	88.9512	116.85
ENSRNOG00000018379_Zfp688	ENSRNOG00000018379	102554302	Zfp688	1	198866137	198869009	-0.0023544	0.99075	0.99829	D	N	N	62.933	29.6402	36.0545	39.0594	36.8094	41.0933	41.4977	37.5148	24.6044	49.4609	49.1349	36.3704
ENSRNOG00000018877_Zfp689	ENSRNOG00000018877	308998	Zfp689	1	198894000	199064150	0.165633	0.273245	0.77289	U	N	N	200.98	324.298	243.368	353.233	318.197	279.434	286.653	377.766	361.577	258.296	310.906	366.026
ENSRNOG00000018518_Prr14	ENSRNOG00000018518	NA	AABR07005779.1	1	198911911	198916184	0.108385	0.496413	0.884599	U	N	N	83.234	114.202	116.276	142.652	139.876	102.733	102.787	138.718	148.696	101.12	144.863	134.648
ENSRNOG00000042728_Fbrs	ENSRNOG00000042728	NA	Fbrs	1	198932870	198937750	0.0356052	0.815966	0.965493	U	N	N	150.227	195.276	128.895	208.034	211.859	141.772	162.799	162.273	196.835	175.861	214.33	162.506
ENSRNOG00000050282_Srcap	ENSRNOG00000050282	NA	Srcap	1	198960542	199007347	0.0752522	0.597489	0.91448	U	N	N	893.242	1257.09	917.586	1368.78	1410.21	967.747	1055.32	1196.98	1308.31	1043.08	1224.98	1396.78
ENSRNOG00000018725_Phkg2	ENSRNOG00000018725	140671	Phkg2	1	199019289	199032052	-0.132638	0.339646	0.80959	D	N	N	353.237	367.887	322.688	502.678	386.908	470.518	329.428	416.153	316.648	372.605	426.966	313.405
ENSRNOG00000053015_Ccdc189	ENSRNOG00000053015	691909	Ccdc189	1	199032105	199037267	-0.194517	0.384658	0.834798	D	N	N	16.2408	28.7684	32.449	38.2103	27.8116	59.5852	32.5597	36.6424	29.9532	20.8835	24.5675	23.2152
ENSRNOG00000018840_Rnf40	ENSRNOG00000018840	266712	Rnf40	1	199037544	199052172	0.135123	0.460442	0.866548	U	N	N	247.672	390.553	228.946	506.074	476.068	349.293	393.27	347.23	422.553	360.515	464.24	471.268
ENSRNOG00000018916_Bcl7c	ENSRNOG00000018916	293514	Bcl7c	1	199155296	199159125	-0.134907	0.494599	0.883595	D	N	N	639.48	401.014	463.3	576.551	449.075	799.264	398.378	751.169	339.113	611.117	444.756	422.516
ENSRNOG00000018962_Ctf1	ENSRNOG00000018962	29201	Ctf1	1	199163086	199168296	-0.333364	0.0615429	0.528051	D	N	N	148.197	208.353	180.272	246.244	233.126	242.45	133.431	251.262	148.696	151.68	126.226	155.542
ENSRNOG00000018986_Fbxl19	ENSRNOG00000018986	308999	Fbxl19	1	199196059	199216391	0.176568	0.414973	0.847679	U	N	N	127.896	255.428	131.599	361.724	376.274	217.794	261.116	283.542	307.02	239.611	312.6	322.691
ENSRNOG00000039730_Orai3	ENSRNOG00000039730	309000	Orai3	1	199217016	199222851	-0.114131	0.387181	0.83561	D	N	N	270.003	239.737	254.184	252.188	235.58	289.708	263.67	308.843	196.835	196.744	215.177	225.187
ENSRNOG00000055028_Setd1a	ENSRNOG00000055028	NA	Setd1a	1	199225100	199247988	0.148029	0.426804	0.853193	U	N	N	290.304	518.703	315.477	626.649	548.051	351.347	399.655	462.392	523.111	441.851	616.728	556.39
ENSRNOG00000019080_Hsd3b7	ENSRNOG00000019080	246211	Hsd3b7	1	199248470	199251740	-0.00845204	0.957898	0.993061	D	N	N	393.839	301.632	337.109	323.514	324.741	219.849	455.198	308.843	282.415	286.873	292.268	261.558
ENSRNOG00000019302_Stx4	ENSRNOG00000019302	81803	Stx4	1	199287710	199294979	-0.0160952	0.881729	0.98061	D	N	N	367.447	410.603	435.358	489.092	455.619	425.315	383.056	487.693	369.066	486.915	409.175	428.707
ENSRNOG00000016683_Zfp668	ENSRNOG00000016683	309002	Zfp668	1	199310935	199320727	0.0384657	0.803165	0.962185	U	N	N	77.1437	67.1262	68.5035	98.4976	95.7045	76.0226	85.5491	96.8406	65.2551	86.8313	81.3268	83.5746
ENSRNOG00000026115_Zfp646	ENSRNOG00000026115	309003	Zfp646	1	199323628	199330997	0.065666	0.778776	0.956486	U	N	N	176.618	421.065	201.004	656.368	551.323	283.544	298.783	383	500.646	328.64	467.629	465.851
ENSRNOG00000026040_Prss53	ENSRNOG00000026040	499270	Prss53	1	199331787	199336451	-0.209572	0.387649	0.835889	D	N	N	4.06019	9.58946	2.70409	16.9824	13.0878	6.16399	0.638426	10.4693	12.8371	0	5.93008	3.8692
ENSRNOG00000050828_Vkorc1	ENSRNOG00000050828	309004	Vkorc1	1	199337138	199341302	-0.221343	0.235058	0.75024	D	N	N	747.076	630.289	954.542	530.698	417.173	698.586	505.633	824.454	505.994	474.825	482.878	526.211
ENSRNOG00000019485_Bckdk	ENSRNOG00000019485	29603	Bckdk	1	199351628	199356881	-0.0954008	0.540381	0.901325	D	N	N	1092.19	894.435	946.43	774.395	689.563	1263.62	842.722	1140.28	853.665	823.249	705.679	882.177
ENSRNOG00000019585_Kat8	ENSRNOG00000019585	310194	Kat8	1	199360645	199372923	-0.11645	0.419715	0.849644	D	N	N	111.655	145.585	146.922	161.332	157.054	143.826	113.64	173.615	104.836	131.896	133.85	141.613
ENSRNOG00000019616_Prss8	ENSRNOG00000019616	192107	Prss8	1	199372519	199377035	-0.0984014	0.667025	0.933104	D	N	N	458.802	1050.48	918.488	984.976	719.011	1808.1	940.401	868.948	1311.52	611.117	608.257	1078.73
ENSRNOG00000033343_Prss36	ENSRNOG00000033343	497040	Prss36	1	199379374	199395363	-0.219544	0.366723	0.823852	D	N	N	10.1505	22.666	28.8436	32.2665	26.9936	32.8746	16.5991	32.2802	27.8136	14.2887	11.013	23.2152
ENSRNOG00000023360_Fus	ENSRNOG00000023360	317385	Fus	1	199412834	199426702	-0.0649839	0.65244	0.930423	D	N	N	1936.71	2343.32	1706.28	2218.74	2026.97	2975.15	2108.72	2316.32	1633.52	2426.88	1829.85	2251.87
ENSRNOG00000019675_Pycard	ENSRNOG00000019675	282817	Pycard	1	199437832	199439210	-0.115482	0.64829	0.928449	D	N	N	621.21	193.533	421.837	183.409	252.758	260.942	257.924	191.064	139.068	610.018	315.988	188.043
ENSRNOG00000019728_Itgad	ENSRNOG00000019728	64350	Itgad	1	199495298	199623960	-0.039487	0.879362	0.980104	D	N	N	702.413	243.224	392.994	162.181	276.48	178.756	345.388	107.31	140.138	629.802	392.232	247.628
ENSRNOG00000036703_Itgax	ENSRNOG00000036703	499271	Itgax	1	199555722	199576932	0.251378	0.33393	0.807045	U	N	N	403.989	170.867	228.946	186.806	224.128	84.2412	254.094	105.565	159.394	713.336	358.346	171.792
ENSRNOG00000019884_LOC103691238	ENSRNOG00000019884	103691238	LOC103691238	1	199654134	199655147	-0.0968607	0.687076	0.940229	D	N	N	14.2107	13.0765	11.7177	16.1332	14.7238	10.2733	14.0454	10.4693	18.1858	6.59479	11.013	13.1553
ENSRNOG00000019935_Armc5	ENSRNOG00000019935	361653	Armc5	1	199655660	199662427	0.00902095	0.960208	0.993613	U	N	N	259.852	307.735	260.494	498.432	478.522	336.965	354.326	450.178	362.647	265.99	388.844	341.263
ENSRNOG00000019965_Tgfb1i1	ENSRNOG00000019965	84574	Tgfb1i1	1	199664173	199670961	-0.300437	0.220512	0.741025	D	N	N	671.962	412.347	447.977	571.456	471.161	1173.21	349.219	880.29	369.066	204.438	343.945	607.464
ENSRNOG00000020144_RGD1310127	ENSRNOG00000020144	361654	RGD1310127	1	199687778	199716205	-0.172095	0.113147	0.617588	D	N	N	347.146	334.759	340.715	465.316	381.182	390.386	310.275	378.638	314.508	320.946	338.014	334.298
ENSRNOG00000042592_Rgs10	ENSRNOG00000042592	54290	Rgs10	1	199782078	199823386	-0.123602	0.603961	0.917041	D	N	N	576.547	324.298	498.453	200.392	277.298	326.692	425.192	263.476	156.184	515.492	390.538	199.65
ENSRNOG00000020271_Tial1	ENSRNOG00000020271	361655	Tial1	1	199844859	199865548	-0.14964	0.282097	0.777385	D	N	N	296.394	268.505	262.296	392.292	355.006	326.692	253.455	259.114	255.672	282.477	367.665	282.451
ENSRNOG00000020298_Bag3	ENSRNOG00000020298	293524	Bag3	1	199941161	199965191	0.0756155	0.616287	0.919357	U	N	N	812.039	849.103	861.702	892.423	1039.66	622.563	992.752	1236.24	815.154	789.176	831.058	722.766
ENSRNOG00000020388_Inpp5f	ENSRNOG00000020388	309008	Inpp5f	1	200037749	200116524	0.0488485	0.80393	0.962299	U	N	N	440.531	509.985	602.11	562.116	853.16	289.708	550.323	757.276	454.646	466.032	598.091	575.736
ENSRNOG00000020394_Mcmbp	ENSRNOG00000020394	309009	Mcmbp	1	200118228	200163106	0.205364	0.104234	0.606876	U	N	N	477.073	489.934	444.371	498.432	529.238	503.393	603.312	423.132	478.181	704.543	605.715	609.785
ENSRNOG00000020411_Sec23ip	ENSRNOG00000020411	309010	Sec23ip	1	200167169	200210377	-0.012844	0.917376	0.987221	D	N	N	676.022	673.006	621.94	816.002	779.542	719.132	683.116	617.686	550.924	828.745	739.565	827.234
ENSRNOG00000016374_Fgfr2	ENSRNOG00000016374	25022	Fgfr2	1	200590953	200696928	-0.330455	0.118966	0.628417	D	N	N	1102.34	1040.02	975.274	1682.1	2622.47	1405.39	677.37	1060.88	1348.96	1105.73	1084.36	1347.25
ENSRNOG00000024414_Ate1	ENSRNOG00000024414	293526	Ate1	1	200810771	201082727	-0.150252	0.312248	0.798409	D	N	N	718.654	515.216	659.797	442.39	533.328	427.37	585.437	417.898	465.344	458.338	443.062	566.45
ENSRNOG00000020457_Tacc2	ENSRNOG00000020457	309025	Tacc2	1	201055644	201329622	0.268948	0.128283	0.645243	U	N	N	377.598	818.591	573.266	857.609	695.289	569.142	739.297	848.009	1046.22	681.461	825.975	694.134
ENSRNOG00000020452_Nsmce4a	ENSRNOG00000020452	NA	Nsmce4a	1	201096059	201110928	-0.000712761	0.996174	0.99927	D	N	N	535.945	557.061	537.212	619.856	548.869	725.296	420.084	683.119	464.274	746.31	606.562	599.725
ENSRNOG00000036675_Btbd16	ENSRNOG00000036675	361658	Btbd16	1	201337416	201391252	-0.0152531	0.949657	0.99127	D	N	N	2.0301	2.61531	3.60545	8.49118	8.99786	2.05466	7.02269	0	1.06976	2.19826	11.013	6.19071
ENSRNOG00000020497_Plekha1	ENSRNOG00000020497	361659	Plekha1	1	201429771	201480877	-0.0749797	0.522621	0.893661	D	N	N	450.681	452.448	434.456	524.755	579.135	380.113	458.39	481.586	415.065	384.696	448.992	491.388
ENSRNOG00000020533_Htra1	ENSRNOG00000020533	65164	Htra1	1	201499028	201548513	0.0401494	0.850189	0.973565	U	N	N	1098.28	2437.47	1889.25	922.991	849.889	1508.12	1821.43	1769.3	1109.34	1548.68	1502	1266.77
ENSRNOG00000020560_Dmbt1	ENSRNOG00000020560	NA	AABR07005821.1	1	201620642	201689759	-0.102181	0.690076	0.94094	D	N	N	814.069	756.696	1237.57	579.947	253.576	203.412	732.275	882.907	354.089	577.044	293.962	586.57
ENSRNOG00000020597_RGD1305014	ENSRNOG00000020597	309029	RGD1305014	1	201925432	201942344	0.152944	0.439143	0.859907	U	N	N	40.6019	28.7684	32.449	33.9647	32.7195	28.7653	25.537	33.1526	41.7205	40.6678	51.6764	31.7274
ENSRNOG00000020605_Pstk	ENSRNOG00000020605	361661	Pstk	1	201950144	201965488	-0.462033	1.25922e-05	0.00464587	D	Y	Y	306.545	400.142	406.514	427.106	364.004	425.315	264.308	309.715	263.16	290.171	249.91	295.607
ENSRNOG00000025651_Ikzf5	ENSRNOG00000025651	309031	Ikzf5	1	201963204	201981250	0.314244	0.189597	0.715287	U	N	N	40.6019	81.0745	73.9117	29.7191	47.4432	18.492	75.3343	43.6219	88.7897	63.7496	57.6065	73.5147
ENSRNOG00000020624_Acadsb	ENSRNOG00000020624	25618	Acadsb	1	201981357	202021008	-0.0607555	0.789759	0.95865	D	N	N	83.234	142.97	152.33	183.409	136.604	65.7492	107.256	72.4123	181.858	79.1374	145.71	143.16
ENSRNOG00000020430_Wdr11	ENSRNOG00000020430	309016	Wdr11	1	202770775	202816334	0.218265	0.0694623	0.541328	U	N	N	452.712	497.78	470.511	450.032	560.321	355.457	570.114	452.795	592.645	528.682	521.847	619.071
ENSRNOG00000020446_AABR07005838.1	ENSRNOG00000020446	NA	AABR07005838.1	1	202904461	202904895	-0.0829768	0.738373	0.947258	D	N	N	22.3311	27.8966	14.4218	19.5297	24.5396	28.7653	19.1528	14.8314	18.1858	26.3791	8.47154	37.9181
ENSRNOG00000034038_AABR07005844.1	ENSRNOG00000034038	NA	AABR07005844.1	1	203160323	203228318	0.026342	0.918915	0.987807	U	N	N	209.1	146.457	306.463	130.764	57.2591	59.5852	167.906	227.706	83.4409	236.313	72.0081	151.672
ENSRNOG00000020643_Bub3	ENSRNOG00000020643	361662	Bub3	1	203524426	203557337	-0.11502	0.521938	0.893642	D	N	N	1134.82	614.597	720.188	696.276	691.199	885.56	663.963	1037.33	510.273	827.646	604.021	672.466
ENSRNOG00000015902_Cpxm2	ENSRNOG00000015902	293566	Cpxm2	1	204048785	204087001	0.569581	0.0292198	0.404239	U	N	N	107.595	210.968	367.756	31.4174	261.756	164.373	752.066	152.677	491.018	264.891	381.219	342.811
ENSRNOG00000016267_Chst15	ENSRNOG00000016267	286974	Chst15	1	204245645	204322544	0.187681	0.372168	0.826882	U	N	N	150.227	114.202	164.048	57.74	96.5225	141.772	198.55	109.055	144.417	134.094	109.283	150.125
ENSRNOG00000016807_Oat	ENSRNOG00000016807	64313	Oat	1	204562289	204582070	-0.263611	0.26768	0.77118	D	N	N	2568.07	1899.59	2128.12	1412.08	895.696	3792.91	1117.25	2359.07	1344.68	2300.48	1030.14	1670.72
ENSRNOG00000017097_Lhpp	ENSRNOG00000017097	361663	Lhpp	1	204617852	204708987	0.0146838	0.934022	0.989544	U	N	N	211.13	139.483	132.5	118.876	152.146	170.537	138.538	194.554	112.324	204.438	123.684	153.994
ENSRNOG00000061348_Fam53b	ENSRNOG00000061348	309060	Fam53b	1	204714473	204817080	0.272614	0.00135987	0.0923321	U	Y	N	456.772	423.68	437.161	365.97	387.726	398.605	445.621	493.8	516.692	506.699	509.987	520.02
ENSRNOG00000017137_Mettl10	ENSRNOG00000017137	361664	Eef1akmt2	1	204831540	204855627	-0.251323	0.0991578	0.598925	D	N	N	158.348	101.125	93.7416	88.3082	110.428	125.334	95.1255	102.948	82.3712	83.534	89.7983	92.8607
ENSRNOG00000017222_Fam175b	ENSRNOG00000017222	293570	Abraxas2	1	204861566	204887377	-0.00390914	0.972129	0.995755	D	N	N	418.2	407.116	413.725	343.044	346.009	334.91	421.361	316.695	333.764	422.066	371.053	390.015
ENSRNOG00000017294_Zranb1	ENSRNOG00000017294	100360606	Zranb1	1	204959174	204998019	0.202522	0.191916	0.718014	U	N	N	129.926	190.917	145.119	174.918	170.141	119.17	176.844	178.85	227.858	134.094	171.125	208.937
ENSRNOG00000017326_Ctbp2	ENSRNOG00000017326	81717	Ctbp2	1	205001396	205040755	-0.0059106	0.975407	0.996067	D	N	N	503.464	743.619	461.497	975.636	859.704	1173.21	672.262	848.882	876.13	755.103	677.723	862.831
ENSRNOG00000026848_Tex36	ENSRNOG00000026848	499279	Tex36	1	205615761	205669760	-0.837618	0.00115905	0.08423	D	Y	N	24.3612	15.6918	7.2109	17.8315	21.2677	69.8586	3.19213	12.2141	10.6976	3.29739	5.93008	6.96455
ENSRNOG00000017728_Edrf1	ENSRNOG00000017728	309069	Edrf1	1	205706468	205743653	-0.127298	0.58042	0.910405	D	N	N	154.287	304.247	196.497	506.074	413.901	258.888	156.414	268.711	346.601	198.943	312.6	350.549
ENSRNOG00000017810_Uros	ENSRNOG00000017810	309070	Uros	1	205756640	205777167	0.0862045	0.554283	0.903791	U	N	N	48.7223	54.9215	55.8844	57.74	71.9829	59.5852	65.1194	65.4328	59.9063	61.5513	60.9951	62.681
ENSRNOG00000018066_Bccip	ENSRNOG00000018066	361666	Bccip	1	205777130	205790175	-0.252817	0.158061	0.683972	D	N	N	682.112	351.323	398.402	382.103	342.737	569.142	345.388	445.816	307.02	452.842	344.792	319.596
ENSRNOG00000018119_Dhx32	ENSRNOG00000018119	361667	Dhx32	1	205789442	205842428	0.0487497	0.769513	0.953598	U	N	N	166.468	256.3	244.269	227.564	260.12	207.521	273.885	174.488	330.555	185.753	236.356	222.092
ENSRNOG00000018384_Adam12	ENSRNOG00000018384	679837	Adam12	1	205956342	206282575	0.140175	0.593377	0.912929	U	N	N	152.257	67.998	110.868	38.2103	79.3447	24.656	167.268	23.5558	50.2785	73.6418	119.449	132.326
ENSRNOG00000018683_Dock1	ENSRNOG00000018683	309081	Dock1	1	206900617	207414843	0.0992111	0.525408	0.895343	U	N	N	1307.38	1033.92	1219.54	1125.93	1778.3	1228.69	1061.06	1335.7	1484.82	1504.71	1132.64	1786.79
ENSRNOG00000015717_Ptpre	ENSRNOG00000015717	114767	Ptpre	1	207887209	207987136	0.0278403	0.862056	0.976509	U	N	N	133.986	129.022	140.612	110.385	161.961	100.679	101.51	117.779	124.092	128.598	168.584	157.863
ENSRNOG00000028137_Mki67	ENSRNOG00000028137	291234	Mki67	1	207993895	208020454	0.132704	0.612253	0.918344	U	N	N	389.779	536.138	134.303	801.567	776.27	1232.8	176.844	800.025	741.341	664.974	844.613	1350.35
ENSRNOG00000016038_Mgmt	ENSRNOG00000016038	25332	Mgmt	1	209237233	209464190	-0.146134	0.566767	0.905631	D	N	N	138.047	120.304	137.908	145.199	80.9807	310.254	77.2495	285.287	78.0922	181.357	77.091	89.7653
ENSRNOG00000016102_Ebf3	ENSRNOG00000016102	361668	Ebf3	1	209523157	209641123	-0.0885606	0.709841	0.944593	D	N	N	79.1738	81.0745	131.599	48.3997	40.0814	36.9839	82.9954	75.0296	65.2551	52.7583	41.5105	66.5502
ENSRNOG00000050554_LOC100362342	ENSRNOG00000050554	100362342	LOC100362342	1	209722408	209749204	0.196335	0.423947	0.85144	U	N	N	36.5417	12.2048	30.6463	13.5859	11.4518	20.5466	24.8986	20.0661	18.1858	37.3705	24.5675	23.2152
ENSRNOG00000016227_Glrx3	ENSRNOG00000016227	58815	Glrx3	1	209768696	209799903	-0.269654	0.10296	0.605116	D	N	N	1447.46	1005.15	1245.68	1082.62	955.409	1690.99	889.327	1019.01	803.387	1395.9	1003.88	898.427
ENSRNOG00000016935_Mapk1ip1	ENSRNOG00000016935	499280	Mapk1ip1	1	211195452	211196868	-0.373148	0.119281	0.62927	D	N	N	79.1738	153.431	125.289	316.721	191.409	162.318	70.2269	168.38	149.766	70.3444	145.71	112.207
ENSRNOG00000016940_Ppp2r2d	ENSRNOG00000016940	246255	Ppp2r2d	1	211205903	211239888	-0.170859	0.119509	0.62933	D	N	N	300.454	290.299	264.099	260.679	252.758	318.473	297.506	239.92	235.346	218.727	254.146	229.83
ENSRNOG00000017243_Bnip3	ENSRNOG00000017243	84480	Bnip3	1	211248098	211265282	-0.410188	0.020265	0.350052	D	N	N	866.851	513.472	512.875	910.254	509.606	636.946	423.915	339.378	571.25	505.6	513.375	492.935
ENSRNOG00000027582_Dpysl4	ENSRNOG00000027582	25417	Dpysl4	1	211423022	211438531	-0.0738088	0.77662	0.955322	D	N	N	14.2107	4.35885	9.01362	5.94382	5.72591	2.05466	8.29954	5.23463	1.06976	10.9913	2.54146	7.73839
ENSRNOG00000017538_Lrrc27	ENSRNOG00000017538	499281	Lrrc27	1	211543751	211575820	-0.110228	0.675254	0.936826	D	N	N	4.06019	6.97415	4.50681	9.34029	7.36188	6.16399	7.02269	6.10706	11.7673	1.09913	5.08292	2.32152
ENSRNOG00000036649_Pwwp2b	ENSRNOG00000036649	361671	Pwwp2b	1	211582077	211600689	0.120664	0.396315	0.83942	U	N	N	259.852	311.222	259.592	238.602	292.839	283.544	261.755	354.21	394.74	286.873	277.867	230.604
ENSRNOG00000017635_Inpp5a	ENSRNOG00000017635	365382	Inpp5a	1	211732713	211921099	-0.0940628	0.501071	0.884801	D	N	N	339.026	261.531	367.756	230.96	295.293	254.778	290.484	259.986	315.578	217.628	288.88	255.367
ENSRNOG00000036648_LOC103691261	ENSRNOG00000036648	103691261	LOC103691261	1	212311300	212317244	-0.524445	0.0453852	0.480979	D	N	N	18.2709	9.58946	14.4218	11.8876	12.2698	4.10933	8.93796	2.61731	5.34878	3.29739	9.31869	6.96455
ENSRNOG00000017897_Adam8	ENSRNOG00000017897	499285	Adam8	1	212317848	212330349	0.201734	0.424955	0.85144	U	N	N	180.679	127.278	129.796	545.983	211.041	55.4759	971.046	33.1526	103.766	172.564	464.24	89.7653
ENSRNOG00000018137_Tubgcp2	ENSRNOG00000018137	309098	Tubgcp2	1	212333741	212354273	0.0322528	0.771597	0.954086	U	N	N	381.658	320.811	285.732	305.682	315.743	394.495	288.569	353.337	326.275	379.2	350.722	338.168
ENSRNOG00000018272_Zfp511	ENSRNOG00000018272	293586	Zfp511	1	212359177	212363668	-0.0651347	0.662126	0.931445	D	N	N	95.4145	115.945	109.966	123.971	96.5225	133.553	105.34	141.335	97.3478	113.21	99.117	85.8961
ENSRNOG00000018522_LOC100911186	ENSRNOG00000018522	140547	Echs1	1	212570195	212579057	-0.392255	0.101812	0.605013	D	N	N	377.598	85.4334	317.279	63.6838	215.949	712.968	73.419	171.87	149.766	0	235.509	106.016
ENSRNOG00000018838_Paox	ENSRNOG00000018838	293589	Paox	1	212578450	212603529	0.156661	0.411564	0.846959	U	N	N	363.387	310.35	269.507	346.44	245.396	367.785	603.312	348.103	252.462	367.11	322.766	262.331
ENSRNOG00000018860_Mtg1	ENSRNOG00000018860	100910751	Mtg1	1	212606777	212619493	-0.0734728	0.631525	0.923709	D	N	N	217.22	187.43	201.905	174.918	129.242	172.592	153.861	232.068	165.812	161.572	157.571	149.351
ENSRNOG00000036647_Olr292	ENSRNOG00000036647	NA	Olr292	1	212714179	212809714	0.097245	0.595513	0.913331	U	N	N	10.1505	0	3.60545	0	8.17987	0	8.29954	1.74488	1.06976	17.5861	5.93008	0
ENSRNOG00000048275_RGD1309350	ENSRNOG00000048275	293613	RGD1309350	1	213577122	213580542	0.174645	0.472728	0.871893	U	N	N	170.528	269.377	164.949	292.096	184.865	258.888	564.369	271.328	200.044	174.762	281.255	104.468
ENSRNOG00000012847_Scgb1c1	ENSRNOG00000012847	309100	Scgb1c1	1	213595240	213596459	-0.503221	0.0557285	0.514058	D	N	N	6.09029	14.8201	37.8572	25.4735	12.2698	20.5466	21.7065	2.61731	5.34878	7.69392	5.08292	12.3814
ENSRNOG00000013165_Bet1l	ENSRNOG00000013165	54400	Bet1l	1	213602850	213605643	-0.148312	0.2708	0.772636	D	N	N	349.177	337.375	438.963	309.079	278.116	378.058	354.326	367.296	304.88	260.494	289.727	289.416
ENSRNOG00000013256_Ric8a	ENSRNOG00000013256	293614	Ric8a	1	213606599	213612904	0.0497362	0.644975	0.927431	U	N	N	678.052	715.723	756.243	640.235	578.317	550.65	788.456	612.451	692.132	706.741	656.544	612.881
ENSRNOG00000013828_Sirt3	ENSRNOG00000013828	293615	Sirt3	1	213613513	213635546	-0.00940084	0.944863	0.990581	D	N	N	117.746	93.2793	100.051	134.161	112.882	106.843	105.34	123.886	124.092	113.21	100.811	94.4084
ENSRNOG00000014109_Psmd13	ENSRNOG00000014109	365388	Psmd13	1	213636093	213648488	-0.0481334	0.761341	0.951296	D	N	N	1538.81	890.076	1096.96	923.84	903.058	1210.2	1064.89	1174.3	819.433	1329.95	1008.96	913.904
ENSRNOG00000014783_Pgghg	ENSRNOG00000014783	309103	Pgghg	1	213737788	213742637	0.0192104	0.891777	0.983317	U	N	N	286.244	198.763	246.973	189.353	237.216	215.74	262.393	168.38	262.09	237.412	217.719	239.89
ENSRNOG00000014936_Ifitm2	ENSRNOG00000014936	114709	Ifitm2	1	213750192	213751405	-0.251557	0.141537	0.663812	D	N	N	3810.49	3681.48	3682.06	3293.73	2333.72	4004.54	2424.1	4126.63	2521.41	3406.21	2172.95	2410.51
ENSRNOG00000004273_Ifitm1	ENSRNOG00000004273	293618	Ifitm1	1	213766758	213767815	-0.28477	0.278191	0.775843	D	N	N	915.574	4296.95	978.879	801.567	522.694	445.862	764.196	905.59	458.925	1664.08	912.385	718.896
ENSRNOG00000015078_Ifitm3	ENSRNOG00000015078	361673	Ifitm3	1	213810696	213811901	-0.0957199	0.685542	0.940229	D	N	N	3816.58	9565.92	6109.43	6663.87	2002.43	6279.05	5489.82	6067.8	4455.53	7944.52	3613.96	3833.6
ENSRNOG00000053075_B4galnt4	ENSRNOG00000053075	309105	B4galnt4	1	213870502	213881917	0.73553	0.000873138	0.0694121	U	Y	N	119.776	134.252	104.558	204.637	160.325	141.772	472.435	179.722	234.276	323.144	315.988	153.22
ENSRNOG00000015152_Pkp3	ENSRNOG00000015152	293619	Pkp3	1	213886775	213897783	0.0835376	0.543304	0.901569	U	N	N	537.976	520.446	544.423	641.933	500.608	754.062	655.663	535.677	786.27	505.6	635.366	598.178
ENSRNOG00000015593_Sigirr	ENSRNOG00000015593	309106	Sigirr	1	213898401	213907144	-0.0954673	0.440455	0.860709	D	N	N	292.334	208.353	274.014	247.942	271.572	330.801	276.438	277.435	247.114	228.619	219.413	251.498
ENSRNOG00000015830_Ano9	ENSRNOG00000015830	499287	Ano9	1	213908982	213921208	0.150615	0.529377	0.896037	U	N	N	117.746	121.176	95.5444	151.992	215.949	65.7492	164.714	53.2187	213.951	154.977	168.584	140.065
ENSRNOG00000045795_Pddc1	ENSRNOG00000045795	100911365	LOC100911365	1	213951759	213957535	-0.107135	0.590973	0.911744	D	N	N	209.1	135.124	220.834	142.652	125.97	131.498	159.606	236.431	116.603	113.21	131.309	122.267
ENSRNOG00000018450_Slc25a22	ENSRNOG00000018450	100911440	LOC100911440	1	213973489	213981330	-0.114815	0.625325	0.921868	D	N	N	0	18.3072	12.6191	77.2697	21.2677	59.5852	32.5597	16.5763	39.581	0	22.026	30.9536
ENSRNOG00000049179_LOC100911519	ENSRNOG00000049179	100911519	LOC100911519	1	213981845	213987053	-0.0148584	0.951712	0.991339	D	N	N	54.8126	77.5875	48.6735	188.504	137.422	69.8586	54.2662	95.0957	119.813	80.2366	127.92	95.956
ENSRNOG00000002116_Rplp2	ENSRNOG00000002116	100911575	Rplp2	1	213991620	213993609	-0.229699	0.321101	0.803265	D	N	N	988.657	585.829	974.372	737.034	408.994	1201.98	537.555	1214.43	455.716	726.526	582.842	424.064
ENSRNOG00000050158_LOC100911692	ENSRNOG00000050158	100911692	Cracr2b	1	214005791	214008973	-0.112454	0.646047	0.927741	D	N	N	0	183.072	145.119	316.721	134.968	382.167	77.888	181.467	249.253	14.2887	160.959	225.961
ENSRNOG00000019215_LOC100911730	ENSRNOG00000019215	64315	LOC100911730	1	214009784	214013765	-0.277728	0.282738	0.777448	D	N	N	710.534	277.223	308.266	723.448	371.366	254.778	307.083	791.301	150.836	252.8	271.936	134.648
ENSRNOG00000019293_LOC100911840	ENSRNOG00000019293	NA	AABR07006025.1	1	214015219	214024153	-0.0474485	0.849393	0.973469	D	N	N	52.7825	34.8708	53.1804	105.291	95.7045	26.7106	69.5884	163.146	0	30.7757	44.052	27.8582
ENSRNOG00000049324_LOC100911766	ENSRNOG00000049324	100911766	LOC100911766	1	214016897	214038723	0.0719359	0.64402	0.927017	U	N	N	75.1136	83.6899	64.8981	88.3082	74.4368	55.4759	80.4417	85.4989	80.2317	62.6505	94.0341	68.8717
ENSRNOG00000019351_LOC100911881	ENSRNOG00000019351	100911881	LOC100911881	1	214039481	214074663	0.0291048	0.762149	0.951296	U	N	N	54.8126	0	0	0	0	6.16399	0	27.0456	0	0	34.7333	44.8827
ENSRNOG00000015912_Ptdss2	ENSRNOG00000015912	293620	Ptdss2	1	214123044	214149729	-0.0211371	0.843911	0.972774	D	N	N	523.765	490.806	548.028	457.674	453.165	534.213	513.933	554.87	563.761	423.165	422.73	475.911
ENSRNOG00000016416_Rnh1	ENSRNOG00000016416	100360501	Rnh1	1	214151338	214163808	0.00225093	0.986638	0.99829	U	N	N	1883.93	1466.32	1571.98	1486.8	1400.39	2099.87	1972.74	1532.87	1478.4	1913.59	1652.8	1358.86
ENSRNOG00000016611_Hras	ENSRNOG00000016611	293621	Hras	1	214178407	214181686	-0.147201	0.453897	0.864934	D	N	N	879.032	444.602	590.392	640.235	531.692	1039.66	487.119	906.463	548.785	618.811	562.51	516.151
ENSRNOG00000016697_Lrrc56	ENSRNOG00000016697	365389	Lrrc56	1	214182830	214197184	-0.125409	0.622542	0.921129	D	N	N	10.1505	14.8201	8.11226	22.0771	19.6317	14.3826	6.38426	13.959	12.8371	9.89218	14.4016	21.6675
ENSRNOG00000017050_Lmntd2	ENSRNOG00000017050	309108	Lmntd2	1	214196430	214202853	-0.190322	0.464645	0.868762	D	N	N	12.1806	9.58946	4.50681	45.8523	26.9936	26.7106	8.93796	24.4283	24.6044	4.39652	23.7203	6.96455
ENSRNOG00000017109_Rassf7	ENSRNOG00000017109	293623	Rassf7	1	214203861	214205782	0.0800098	0.668419	0.933957	U	N	N	69.0233	133.381	80.2212	160.483	105.52	139.717	132.154	120.396	126.231	95.6244	144.016	118.397
ENSRNOG00000017299_Phrf1	ENSRNOG00000017299	245925	Phrf1	1	214215992	214248901	0.29164	0.0607914	0.525678	U	N	N	381.658	572.752	407.416	654.67	749.276	513.666	722.06	642.114	714.597	619.91	678.57	736.695
ENSRNOG00000017414_Irf7	ENSRNOG00000017414	293624	Irf7	1	214248837	214252456	0.272537	0.299072	0.791493	U	N	N	558.277	1480.26	580.477	649.575	440.895	2373.14	870.813	725.868	1391.75	3798.6	688.736	1258.26
ENSRNOG00000017960_Deaf1	ENSRNOG00000017960	83632	Deaf1	1	214283790	214317466	-0.102199	0.635996	0.924985	D	N	N	184.739	265.018	188.385	493.337	289.567	355.457	153.861	350.72	315.578	258.296	277.019	270.844
ENSRNOG00000018061_Tmem80	ENSRNOG00000018061	NA	Tmem80	1	214317682	214326294	-0.173536	0.409856	0.846309	D	N	N	64.9631	108.971	99.1498	155.389	148.056	96.5692	116.832	131.738	108.045	54.9565	84.7154	87.4438
ENSRNOG00000018336_Eps8l2	ENSRNOG00000018336	361674	Eps8l2	1	214328071	214353461	0.141563	0.478367	0.873379	U	N	N	300.454	472.499	421.837	557.87	422.081	669.82	462.859	491.182	803.387	369.308	404.092	672.466
ENSRNOG00000018367_Taldo1	ENSRNOG00000018367	83688	Taldo1	1	214375515	214385885	-0.0644795	0.781559	0.957169	D	N	N	2259.5	1781.9	2157.86	1750.88	1497.73	5475.68	1854.63	3084.94	2034.68	2595.05	1612.98	2850.82
ENSRNOG00000046382_LOC100911365	ENSRNOG00000046382	309110	Gatd1	1	214389255	214394411	0.232381	0.322042	0.80328	U	N	N	58.8728	64.5109	21.6327	36.5121	30.2655	22.6013	56.1815	51.4738	53.4878	58.2539	28.8032	44.1088
ENSRNOG00000049944_LOC100911440	ENSRNOG00000049944	309111	Slc25a22	1	214410417	214414897	0.213379	0.34653	0.812962	U	N	N	144.137	190.917	152.33	255.584	300.201	182.865	128.962	437.964	202.184	292.369	253.299	182.626
ENSRNOG00000037607_LOC100911575	ENSRNOG00000037607	140662	LOC100911575	1	214428526	214430515	-0.229699	0.321101	0.803265	D	N	N	988.657	585.829	974.372	737.034	408.994	1201.98	537.555	1214.43	455.716	726.526	582.842	424.064
ENSRNOG00000018736_Pnpla2	ENSRNOG00000018736	361676	LOC100911615	1	214434626	214439720	0.192167	0.270926	0.772636	U	N	N	426.32	924.075	606.617	697.126	532.51	791.045	765.473	904.718	774.503	874.908	545.567	771.518
ENSRNOG00000019199_Cracr2b	ENSRNOG00000019199	309112	LOC100911692	1	214440503	214445874	0.201873	0.428954	0.854797	U	N	N	142.107	206.609	161.344	122.273	95.7045	283.544	301.975	110.8	269.578	100.021	87.2569	393.884
ENSRNOG00000046094_Cd151	ENSRNOG00000046094	64315	Cd151	1	214446659	214450666	0.0520364	0.748951	0.948116	U	N	N	2312.28	1819.38	2394.02	1368.78	1767.67	2504.63	2660.32	2397.46	2051.79	1587.15	2104.33	1854.89
ENSRNOG00000048562_Polr2l	ENSRNOG00000048562	NA	AC109542.1	1	214452127	214455039	-0.0599517	0.810528	0.964045	D	N	N	182.709	69.7415	70.3062	0	32.7195	164.373	44.0514	67.1777	102.697	113.21	55.065	76.6101
ENSRNOG00000029810_Tspan4	ENSRNOG00000029810	293627	Tspan4	1	214454090	214473741	0.185228	0.329591	0.806929	U	N	N	641.51	596.29	915.784	433.899	322.287	548.595	727.806	780.832	645.063	682.56	561.663	625.262
ENSRNOG00000050181_Chid1	ENSRNOG00000050181	293628	Chid1	1	214476387	214511529	-0.0859723	0.627778	0.922668	D	N	N	546.096	303.376	452.484	287.002	382.818	567.087	444.983	337.633	360.508	501.204	377.831	337.394
ENSRNOG00000019534_Ap2a2	ENSRNOG00000019534	81637	Ap2a2	1	214534284	214606169	-0.0385625	0.851692	0.974102	D	N	N	1926.56	944.126	1440.38	655.519	745.186	1051.99	1222.59	826.199	1041.94	1166.18	1046.24	1232.73
ENSRNOG00000056817_Muc6	ENSRNOG00000056817	282586	Muc6	1	214608704	214629938	-0.440381	0.0924207	0.583316	D	N	N	8.12039	17.4354	8.11226	10.1894	9.81584	16.4373	3.19213	12.2141	8.55805	2.19826	7.62439	6.19071
ENSRNOG00000019861_Tollip	ENSRNOG00000019861	361677	Tollip	1	214823978	214844858	0.0617273	0.616675	0.919357	U	N	N	842.49	854.334	943.726	616.459	665.841	628.727	762.919	879.417	777.712	791.374	745.496	808.662
ENSRNOG00000020044_Mob2	ENSRNOG00000020044	499288	Mob2	1	214954553	214971929	-0.067126	0.617915	0.919357	D	N	N	184.739	147.329	205.511	170.673	161.961	195.193	174.929	215.492	142.278	163.771	156.723	153.994
ENSRNOG00000029394_Dusp8	ENSRNOG00000029394	361679	Dusp8	1	215030429	215033460	0.197651	0.446973	0.862269	U	N	N	10.1505	6.97415	14.4218	11.0385	21.2677	8.21865	16.5991	6.9795	27.8136	8.79305	15.2488	17.7983
ENSRNOG00000050994_Cttn	ENSRNOG00000050994	60465	Cttn	1	215255381	215290845	0.477643	0.0453132	0.480979	U	N	N	576.547	791.567	557.042	680.143	1135.37	1080.75	2678.2	753.786	895.386	772.689	1041.15	1542.26
ENSRNOG00000020164_Ifitm10	ENSRNOG00000020164	NA	Ifitm10	1	215515764	215536980	0.461979	0.0699109	0.54146	U	N	N	12.1806	5.23062	10.8163	6.79294	0	2.05466	22.9833	13.959	16.0463	7.69392	17.7902	4.64303
ENSRNOG00000020206_Ctsd	ENSRNOG00000020206	171293	Ctsd	1	215541542	215553451	0.305613	0.123392	0.636155	U	N	N	3120.26	4857.5	3305.29	1752.58	2915.31	4320.96	6033.76	4055.09	4086.47	3496.34	4984.65	3517.1
ENSRNOG00000020245_Syt8	ENSRNOG00000020245	60566	Syt8	1	215605404	215607696	0.421851	0.102734	0.605116	U	N	N	40.6019	13.0765	18.0272	26.3226	37.6274	8.21865	56.8199	26.1731	44.9297	41.767	52.5236	13.9291
ENSRNOG00000020276_Tnni2	ENSRNOG00000020276	29389	Tnni2	1	215609036	215611658	0.217519	NA	NA	U	NA	NA	308.575	4.35885	7.2109	10.1894	13.0878	49.3119	3.83056	6.10706	2353.46	14.2887	6.77723	3.8692
ENSRNOG00000020300_Lsp1	ENSRNOG00000020300	361680	Lsp1	1	215628785	215662504	0.138562	0.594078	0.912929	U	N	N	897.303	412.347	704.865	405.878	601.22	215.74	524.786	279.18	263.16	1601.43	735.33	422.516
ENSRNOG00000020332_Tnnt3	ENSRNOG00000020332	24838	Tnnt3	1	215666628	215683628	0.249958	NA	NA	U	NA	NA	361.357	21.7942	7.2109	16.9824	21.2677	69.8586	6.38426	6.9795	4446.97	7.69392	22.026	7.73839
ENSRNOG00000020354_Mrpl23	ENSRNOG00000020354	64360	Mrpl23	1	215701544	215709313	-0.161455	0.461811	0.866718	D	N	N	661.811	365.271	465.103	320.117	339.465	630.782	339.004	718.016	323.066	437.454	306.67	277.808
ENSRNOG00000020369_Igf2	ENSRNOG00000020369	24483	Igf2	1	215828102	215846911	-0.361333	0.140344	0.662925	D	N	N	152.257	310.35	155.936	26.3226	6.5439	14.3826	44.0514	104.693	53.4878	54.9565	12.7073	42.5611
ENSRNOG00000056268_AC099449.1	ENSRNOG00000056268	NA	AC099449.1	1	215908373	215986959	-0.123428	0.640897	0.926728	D	N	N	4.06019	11.333	5.40817	17.8315	13.9058	6.16399	3.19213	9.59682	8.55805	5.49565	13.5545	11.6076
ENSRNOG00000020451_Cd81	ENSRNOG00000020451	25621	Cd81	1	216237697	216253311	-0.194207	0.256003	0.762771	D	N	N	4277.41	4138.29	4534.75	2566.88	2668.27	5403.77	3478.14	3385.93	3761.26	3465.56	2666.84	3476.86
ENSRNOG00000032677_Tssc4	ENSRNOG00000032677	361682	Tssc4	1	216254979	216256608	-0.146017	0.441752	0.861764	D	N	N	142.107	178.713	172.16	280.209	190.591	258.888	134.708	257.369	192.556	186.852	182.985	132.326
ENSRNOG00000020532_Kcnq1	ENSRNOG00000020532	84020	Kcnq1	1	216293087	216630339	0.550061	0.0175981	0.331872	U	N	N	10.1505	55.7932	15.3232	16.1332	4.90792	18.492	305.168	17.4488	57.7668	10.9913	49.1349	11.6076
ENSRNOG00000059500_Cdkn1c	ENSRNOG00000059500	246060	Cdkn1c	1	216661080	216663721	-0.323719	0.199294	0.724668	D	N	N	73.0835	139.483	500.256	17.8315	20.4497	265.052	106.617	171.87	90.9292	59.3531	26.2618	96.7299
ENSRNOG00000020562_Slc22a18	ENSRNOG00000020562	309131	Slc22a18	1	216677373	216700641	-0.127677	0.53844	0.900676	D	N	N	117.746	180.456	213.623	173.22	177.503	201.357	260.478	173.615	119.813	89.0296	179.597	130.005
ENSRNOG00000020614_Phlda2	ENSRNOG00000020614	293637	Phlda2	1	216702319	216703534	-0.0647397	0.799666	0.961452	D	N	N	24.3612	7.84592	13.5204	25.4735	24.5396	22.6013	15.9606	36.6424	17.1161	12.0904	14.4016	12.3814
ENSRNOG00000020615_Nap1l4	ENSRNOG00000020615	361684	Nap1l4	1	216715363	216750844	0.182681	0.0788136	0.560301	U	N	N	927.754	707.005	792.297	625.8	837.619	850.631	870.175	903.845	838.688	990.317	886.123	903.07
ENSRNOG00000020651_Cars	ENSRNOG00000020651	293638	Cars	1	216759366	216801656	0.211268	0.175442	0.702988	U	N	N	286.244	291.171	293.844	331.156	346.826	562.978	393.27	407.428	413.995	447.346	383.761	426.385
ENSRNOG00000043486_Tnfrsf26	ENSRNOG00000043486	361685	Tnfrsf26	1	216808632	216828651	0.082239	0.619412	0.91971	U	N	N	73.0835	71.4851	83.8267	72.175	65.439	51.3666	88.1028	56.7085	62.0458	79.1374	91.4926	70.4194
ENSRNOG00000020713_Osbpl5	ENSRNOG00000020713	361686	Osbpl5	1	216866245	216920625	0.065438	0.719199	0.945853	U	N	N	312.635	462.038	409.218	480.601	484.248	515.721	420.723	633.39	580.877	265.99	416.8	492.935
ENSRNOG00000020736_Nadsyn1	ENSRNOG00000020736	353255	Nadsyn1	1	216985714	217013702	0.108844	0.452305	0.863759	U	N	N	97.4446	112.458	76.6158	116.329	122.698	121.225	111.086	129.121	133.719	102.219	121.143	105.242
ENSRNOG00000020776_Dhcr7	ENSRNOG00000020776	64191	Dhcr7	1	217018916	217034904	-0.089389	0.711876	0.945355	D	N	N	700.383	476.858	532.705	317.57	471.161	1095.14	361.349	1119.34	501.715	418.769	352.416	527.758
ENSRNOG00000050206_Shank2	ENSRNOG00000050206	171093	Shank2	1	217151166	217592763	-0.0136693	0.95786	0.993061	D	N	N	79.1738	356.554	131.599	319.268	251.94	242.45	210.681	368.169	289.904	61.5513	123.684	307.214
ENSRNOG00000047280_Cttn	ENSRNOG00000047280	60465	Cttn	1	217602698	217638152	-0.0837363	0.725124	0.945853	D	N	N	1067.83	758.439	986.09	1226.97	1156.63	427.37	386.886	1251.08	1068.69	869.413	1158.06	453.47
ENSRNOG00000020857_Ppfia1	ENSRNOG00000020857	293645	Ppfia1	1	217644224	217721376	0.262773	0.148604	0.672523	U	N	N	475.043	579.727	501.157	672.501	732.098	575.306	559.261	1206.58	704.969	568.251	615.034	719.67
ENSRNOG00000047035_Fadd	ENSRNOG00000047035	266610	Fadd	1	217742929	217748628	0.110593	0.301432	0.79249	U	N	N	306.545	291.171	253.283	241.149	237.216	283.544	273.246	335.016	273.857	306.658	282.949	264.653
ENSRNOG00000020865_Ano1	ENSRNOG00000020865	309135	Ano1	1	217754336	217902473	0.410097	0.10566	0.608686	U	N	N	1067.83	1418.37	1672.93	3085.69	1506.73	3671.68	5196.15	1406.37	3853.26	1245.32	3429.28	4346.65
ENSRNOG00000020903_Oraov1	ENSRNOG00000020903	309136	Lto1	1	218076116	218080824	0.17311	0.478059	0.873379	U	N	N	10.1505	11.333	9.01362	19.5297	19.6317	22.6013	25.537	13.0866	18.1858	13.1896	22.8732	15.4768
ENSRNOG00000020918_Ccnd1	ENSRNOG00000020918	58919	Ccnd1	1	218090750	218100325	0.154284	0.480833	0.874038	U	N	N	4896.59	5663.89	5875.98	7559.69	9355.32	4645.59	12069.4	4557.61	7133.13	5265.94	9821.06	4757.56
ENSRNOG00000013373_Rmt1	ENSRNOG00000013373	246306	Rmt1	1	218369204	218374619	-0.173847	0.310709	0.798311	D	N	N	365.417	61.8956	61.2926	7850.94	7750.43	182.865	3962.07	61.9431	941.385	14.2887	1210.58	185.721
ENSRNOG00000013387_Tpcn2	ENSRNOG00000013387	309139	Tpcn2	1	218419184	218448877	-0.271826	0.282407	0.777448	D	N	N	87.2941	166.508	81.1226	400.783	273.208	160.264	93.8486	190.191	179.719	80.2366	176.208	153.22
ENSRNOG00000013426_Mrgprf	ENSRNOG00000013426	266762	Mrgprf	1	218466289	218476224	-0.425704	0.0984611	0.598453	D	N	N	140.077	128.15	220.834	61.9856	66.2569	82.1865	71.5037	126.503	53.4878	26.3791	38.1219	110.659
ENSRNOG00000013456_Ighmbp2	ENSRNOG00000013456	29532	Ighmbp2	1	218508950	218532142	0.12728	0.499748	0.884801	U	N	N	75.1136	131.637	86.5307	118.027	175.049	135.608	110.448	135.228	172.231	141.788	106.741	140.839
ENSRNOG00000013845_Mrpl21	ENSRNOG00000013845	309140	Mrpl21	1	218532045	218540523	-0.369214	0.0436689	0.476035	D	N	N	276.093	175.226	189.286	225.016	188.955	312.309	128.324	241.665	133.719	191.249	163.501	149.351
ENSRNOG00000014254_Cpt1a	ENSRNOG00000014254	25757	Cpt1a	1	218569510	218629678	-0.0222226	0.898085	0.983317	D	N	N	850.61	949.357	635.46	786.283	1274.42	610.235	718.229	1032.09	947.804	669.371	827.67	828.782
ENSRNOG00000015540_Ppp6r3	ENSRNOG00000015540	309144	Ppp6r3	1	218695738	218810135	0.10054	0.214749	0.735369	U	N	N	911.513	1025.2	926.6	1018.94	1194.26	1027.33	1130.65	1059.14	1075.1	1071.65	1073.34	1156.12
ENSRNOG00000015911_Lrp5	ENSRNOG00000015911	293649	Lrp5	1	218816841	218920094	0.322314	0.0760782	0.555116	U	N	N	856.701	1203.04	926.6	1084.32	906.33	1598.53	1234.72	1349.66	2010.07	987.02	1253.79	1681.55
ENSRNOG00000025245_RGD1311946	ENSRNOG00000025245	309145	RGD1311946	1	218945508	218954280	0.0499527	0.708348	0.944228	U	N	N	133.986	122.048	155.936	112.933	145.602	186.974	135.346	164.018	143.347	150.581	138.086	150.125
ENSRNOG00000016790_Kmt5b	ENSRNOG00000016790	361688	Kmt5b	1	219000844	219050211	-0.153993	0.413352	0.847349	D	N	N	401.959	747.978	618.334	853.363	991.4	573.251	570.753	663.925	739.201	430.859	577.759	718.123
ENSRNOG00000016791_Chka	ENSRNOG00000016791	29194	Chka	1	219077771	219126220	-0.0911995	0.686927	0.940229	D	N	N	109.625	206.609	191.089	435.597	260.938	308.2	187.697	331.526	262.09	167.068	199.928	245.307
ENSRNOG00000017220_Tcirg1	ENSRNOG00000017220	293650	Tcirg1	1	219127602	219139464	-0.0239779	0.896596	0.983317	D	N	N	448.651	526.549	390.29	789.679	557.867	770.499	459.667	406.556	657.9	608.919	709.068	574.189
ENSRNOG00000017446_Ndufs8	ENSRNOG00000017446	293652	Ndufs8	1	219141292	219144610	-0.180946	0.41264	0.847349	D	N	N	925.724	487.319	615.63	594.382	566.865	1234.85	573.306	1102.76	509.204	624.306	473.559	469.72
ENSRNOG00000017703_Unc93b1	ENSRNOG00000017703	361689	Unc93b1	1	219144205	219183963	0.166937	0.497247	0.884698	U	N	N	1218.06	687.826	940.12	351.535	494.882	610.235	921.887	531.315	493.157	1722.34	859.861	572.641
ENSRNOG00000017512_Aldh3b1	ENSRNOG00000017512	309147	Aldh3b1	1	219145459	219186860	0.221784	0.390134	0.837429	U	N	N	109.625	40.1014	60.3912	53.4944	41.7173	53.4213	190.251	51.4738	39.581	46.1635	89.7983	41.7873
ENSRNOG00000017872_LOC688778	ENSRNOG00000017872	688778	AABR07006089.1	1	219199158	219207182	0.267404	0.308236	0.797012	U	N	N	213.16	28.7684	45.0681	115.48	160.325	34.9293	208.127	86.3713	200.044	47.2626	251.605	81.2531
ENSRNOG00000017901_Acy3	ENSRNOG00000017901	293653	Acy3	1	219233750	219237098	0.229544	0.222519	0.741446	U	N	N	162.408	148.201	126.191	179.164	130.06	133.553	192.166	240.793	205.393	91.2279	179.597	150.125
ENSRNOG00000017955_Nudt8	ENSRNOG00000017955	361692	Nudt8	1	219247672	219249207	-0.314638	0.12982	0.646148	D	N	N	227.371	125.535	174.864	152.841	171.777	238.341	135.346	246.9	111.255	120.904	110.13	102.147
ENSRNOG00000018029_Doc2g	ENSRNOG00000018029	293654	Doc2g	1	219250265	219253788	-0.149427	0.491657	0.881442	D	N	N	0	8.71769	0.901362	43.305	26.1756	8.21865	1.91528	13.959	13.9068	0	16.9431	8.51223
ENSRNOG00000018117_Ndufv1	ENSRNOG00000018117	293655	Ndufv1	1	219254279	219259448	-0.102374	0.551451	0.903782	D	N	N	1496.18	999.048	1101.46	1012.15	943.957	1577.98	1041.27	1568.64	913.571	1209.04	889.512	944.084
ENSRNOG00000018237_Gstp1	ENSRNOG00000018237	24426	Gstp1	1	219291679	219294147	-0.24047	0.268316	0.77118	D	N	N	2961.91	2595.26	3058.32	3073.81	1726.77	5416.09	2956.55	3991.4	2095.65	1675.08	2363.56	2127.28
ENSRNOG00000018391_Cdk2ap2	ENSRNOG00000018391	688405	Cdk2ap2	1	219345918	219347728	-0.152191	0.454582	0.865509	D	N	N	724.744	405.373	571.463	359.177	391.816	651.328	418.169	450.178	330.555	749.607	400.704	372.217
ENSRNOG00000018553_Pitpnm1	ENSRNOG00000018553	361694	Pitpnm1	1	219348721	219362094	0.0998263	0.586156	0.911336	U	N	N	513.614	289.427	418.232	489.941	507.152	269.161	419.446	369.041	394.74	600.125	541.331	375.312
ENSRNOG00000022289_Aip	ENSRNOG00000022289	282827	Aip	1	219361860	219374014	-0.0431508	0.774278	0.954474	D	N	N	462.862	389.681	454.286	449.183	433.533	575.306	400.931	632.517	387.252	490.212	403.245	355.192
ENSRNOG00000022153_Tmem134	ENSRNOG00000022153	361695	Tmem134	1	219374060	219379557	-0.0865516	0.648043	0.928282	D	N	N	1132.79	576.24	730.103	567.211	575.863	908.161	878.474	845.392	573.389	732.021	659.933	482.102
ENSRNOG00000032303_Rpl35a	ENSRNOG00000032303	100359498	LOC103690996	1	219395276	219395623	-0.438542	0.0530114	0.506158	D	N	N	5308.7	3551.59	6075.18	3608.75	2169.3	7947.44	2810.99	5030.48	2589.88	3545.8	2418.62	2745.58
ENSRNOG00000021828_Coro1b	ENSRNOG00000021828	29474	Coro1b	1	219397850	219403260	0.0560641	0.70433	0.943634	U	N	N	2764.99	2036.45	2360.67	1879.95	1892.82	2346.43	2435.59	2517.86	1786.49	3074.27	2138.22	1896.68
ENSRNOG00000021724_Ptprcap	ENSRNOG00000021724	499300	Ptprcap	1	219403970	219406128	-0.0296933	0.910069	0.985452	D	N	N	432.411	250.198	420.936	278.511	404.904	80.1319	381.779	88.9886	56.6971	617.712	493.891	150.899
ENSRNOG00000021689_Rps6kb2	ENSRNOG00000021689	361696	Rps6kb2	1	219406202	219412888	-0.059647	0.789306	0.95857	D	N	N	73.0835	107.228	66.7008	184.259	137.422	135.608	58.0968	126.503	139.068	105.517	124.532	116.85
ENSRNOG00000018603_Carns1	ENSRNOG00000018603	309150	Carns1	1	219414915	219422268	-0.0095198	0.97017	0.995466	D	N	N	10.1505	19.1789	11.7177	23.7753	29.4475	12.328	10.2148	25.3007	24.6044	9.89218	23.7203	15.4768
ENSRNOG00000021510_Tbc1d10c	ENSRNOG00000021510	361697	Tbc1d10c	1	219431997	219438779	0.0453543	0.862997	0.976937	U	N	N	119.776	101.997	112.67	143.501	206.133	22.6013	139.815	25.3007	48.139	222.024	256.688	65.7763
ENSRNOG00000018708_Ppp1ca	ENSRNOG00000018708	24668	Ppp1ca	1	219439953	219443570	-0.20267	0.272222	0.772863	D	N	N	5929.91	2692.9	3671.25	2491.31	2649.46	3373.76	3119.99	2832.81	2518.2	3541.4	2895.57	2741.71
ENSRNOG00000018729_Rad9a	ENSRNOG00000018729	100361529	Rad9a	1	219444092	219450451	0.0254461	0.884694	0.981417	U	N	N	56.8427	82.8181	63.9967	96.7994	94.8865	63.6946	63.8426	65.4328	99.4873	78.0383	90.6455	80.4793
ENSRNOG00000018752_Clcf1	ENSRNOG00000018752	365395	Clcf1	1	219468675	219472654	-0.222827	0.398234	0.840697	D	N	N	12.1806	23.5378	11.7177	61.9856	56.4411	10.2733	8.93796	30.5353	31.0229	15.3878	28.8032	17.0245
ENSRNOG00000018765_Pold4	ENSRNOG00000018765	361698	Pold4	1	219481575	219483241	-0.0740635	0.630204	0.923217	D	N	N	205.04	168.251	228.946	171.522	146.42	197.248	234.941	174.488	167.952	178.059	155.876	138.517
ENSRNOG00000018878_Ssh3	ENSRNOG00000018878	365396	Ssh3	1	219511910	219519398	-0.0358349	0.822091	0.966889	D	N	N	397.899	527.42	430.851	633.442	615.126	583.524	559.261	499.034	665.388	356.118	549.803	475.137
ENSRNOG00000028247_Ankrd13d	ENSRNOG00000028247	361699	Ankrd13d	1	219520075	219532609	-0.0919856	0.704067	0.943634	D	N	N	58.8728	113.33	71.2076	191.901	149.692	184.92	69.5884	161.401	185.068	80.2366	102.506	105.242
ENSRNOG00000018985_Grk2	ENSRNOG00000018985	25238	Grk2	1	219536220	219544328	0.238878	0.107721	0.610363	U	N	N	933.844	993.817	931.107	748.073	800.809	895.833	971.046	654.328	1199.2	1231.03	1150.44	1151.47
ENSRNOG00000019145_Kdm2a	ENSRNOG00000019145	361700	Kdm2a	1	219566156	219640294	0.0822123	0.655706	0.931328	U	N	N	720.684	1330.32	977.076	1728.8	1492.83	930.763	1270.47	1079.21	1504.08	1049.67	1420.68	1361.96
ENSRNOG00000019220_Rhod	ENSRNOG00000019220	293660	Rhod	1	219668352	219682287	-0.219885	0.239648	0.751748	D	N	N	162.408	115.074	130.697	200.392	147.238	248.614	139.815	128.248	186.137	102.219	126.226	150.899
ENSRNOG00000019306_Syt12	ENSRNOG00000019306	191595	Syt12	1	219688451	219719272	-0.326472	0.211463	0.734035	D	N	N	18.2709	148.201	89.2348	62.8347	17.1777	228.068	49.1588	42.7494	101.627	27.4783	45.7463	76.6101
ENSRNOG00000019372_Pc	ENSRNOG00000019372	25104	Pc	1	219759183	219859848	0.258177	0.324365	0.804566	U	N	N	154.287	360.041	217.228	144.35	131.696	653.383	248.986	321.93	355.159	274.783	149.099	962.656
ENSRNOG00000019356_Lrfn4	ENSRNOG00000019356	688721	Lrfn4	1	219850037	219853329	0.165575	0.375106	0.828203	U	N	N	172.558	227.532	143.317	230.111	183.229	295.872	164.075	335.889	264.23	208.835	216.024	240.664
ENSRNOG00000019468_Rce1	ENSRNOG00000019468	309153	Rce1	1	219860827	219863926	-0.108671	0.452494	0.863759	D	N	N	330.906	222.301	235.255	199.543	215.131	269.161	234.302	283.542	215.021	214.331	190.61	205.067
ENSRNOG00000058842_Sptbn2	ENSRNOG00000058842	29211	Sptbn2	1	219964429	220005068	0.343409	0.145508	0.666853	U	N	N	233.461	279.838	188.385	236.055	631.486	221.904	573.945	308.843	554.133	234.115	411.717	413.23
ENSRNOG00000061795_Rbm4b	ENSRNOG00000061795	474154	Rbm4b	1	220009397	220019486	-0.175966	0.266079	0.770977	D	N	N	184.739	166.508	177.568	182.56	204.497	178.756	122.578	228.579	177.579	141.788	122.837	164.054
ENSRNOG00000050741_Rbm4	ENSRNOG00000050741	293663	Rbm4	1	220039734	220048966	-0.0985992	0.467393	0.870479	D	N	N	600.909	364.4	419.133	424.559	465.435	503.393	466.051	522.59	389.391	422.066	399.857	366.8
ENSRNOG00000045568_Rbm14	ENSRNOG00000045568	170900	Rbm14	1	220048873	220067124	-0.201505	0.240303	0.752046	D	N	N	753.166	382.707	406.514	426.257	488.338	653.383	354.965	476.351	415.065	541.872	423.577	430.255
ENSRNOG00000047816_Ccs	ENSRNOG00000047816	84485	Ccs	1	220075247	220096404	-0.112455	0.555046	0.903791	D	N	N	280.153	157.79	250.579	213.978	251.94	230.122	232.387	324.547	170.091	215.43	182.985	133.874
ENSRNOG00000019708_Ctsf	ENSRNOG00000019708	361704	Ctsf	1	220114228	220119976	0.0592639	0.776751	0.955353	U	N	N	377.598	532.651	730.103	266.623	354.188	380.113	624.381	593.258	419.344	346.226	351.569	446.505
ENSRNOG00000019745_Actn3	ENSRNOG00000019745	171009	Actn3	1	220120533	220136470	0.203477	NA	NA	U	NA	NA	582.638	22.666	9.91498	12.7368	19.6317	119.17	0.638426	47.9841	4362.46	12.0904	5.93008	16.2506
ENSRNOG00000019825_Zdhhc24	ENSRNOG00000019825	293665	Zdhhc24	1	220137257	220144319	-0.128563	0.50328	0.885565	D	N	N	105.565	77.5875	75.7144	99.3468	125.152	67.8039	100.871	114.289	83.4409	59.3531	71.1609	67.324
ENSRNOG00000019832_Bbs1	ENSRNOG00000019832	309156	Bbs1	1	220147327	220165678	0.227623	0.141025	0.662925	U	N	N	121.806	132.509	110.868	143.501	143.148	160.264	143.646	165.763	213.951	116.508	145.71	179.531
ENSRNOG00000031485_Dpp3	ENSRNOG00000031485	114591	Dpp3	1	220166127	220188541	0.178853	0.279302	0.776593	U	N	N	1110.46	790.695	831.957	687.785	828.621	552.705	1246.85	920.422	755.248	991.416	831.058	772.291
ENSRNOG00000019950_Peli3	ENSRNOG00000019950	309157	Peli3	1	220190067	220204032	0.172219	0.443811	0.862269	U	N	N	36.5417	62.7674	40.5613	54.3435	89.1606	34.9293	93.8486	61.9431	56.6971	39.5687	70.3138	54.9426
ENSRNOG00000019970_mrpl11	ENSRNOG00000019970	293666	mrpl11	1	220243473	220246346	-0.0771733	0.682316	0.939236	D	N	N	282.183	217.071	202.806	238.602	217.585	359.566	203.658	376.893	186.137	257.197	191.457	201.972
ENSRNOG00000050201_LOC108348052	ENSRNOG00000050201	65194	Slc29a2	1	220307394	220314035	-0.0937674	0.616284	0.919357	D	N	N	87.2941	129.022	65.7994	76.4206	83.4347	78.0772	63.2042	67.1777	111.255	91.2279	73.7024	78.9316
ENSRNOG00000020117_LOC108348098	ENSRNOG00000020117	108348098	LOC108348098	1	220325352	220334615	0.0139522	0.916893	0.987103	U	N	N	568.427	550.958	583.181	604.572	457.255	579.415	572.03	685.736	480.32	663.875	557.427	417.873
ENSRNOG00000050223_Rin1	ENSRNOG00000050223	207119	Rin1	1	220335254	220342297	0.167937	0.457639	0.866104	U	N	N	111.655	91.5358	86.5307	150.294	109.61	84.2412	182.59	76.7745	119.813	71.4435	198.234	90.5392
ENSRNOG00000049951_Tmem151a	ENSRNOG00000049951	309158	NEWGENE_1310680	1	220373290	220467159	-0.149972	0.563105	0.905228	D	N	N	8.12039	3.48708	4.50681	8.49118	35.1734	4.10933	9.57639	9.59682	8.55805	12.0904	3.38862	7.73839
ENSRNOG00000020110_B4gat1	ENSRNOG00000020110	293667	B4gat1	1	220416018	220418240	0.0226549	0.836777	0.970987	U	N	N	223.311	203.122	239.762	184.259	188.137	242.45	240.687	209.385	212.881	197.844	207.553	220.544
ENSRNOG00000047683_Brms1	ENSRNOG00000047683	293668	LOC108348098	1	220423426	220426975	-0.089874	0.579968	0.910405	D	N	N	6.09029	38.3578	0	0	36.8094	0	8.93796	0	0	3.29739	13.5545	20.1198
ENSRNOG00000020197_LOC100911932	ENSRNOG00000020197	293669	Cd248	1	220446425	220448989	-0.422839	0.0843993	0.570203	D	N	N	714.594	700.903	1323.2	321.816	380.364	499.283	605.228	552.253	263.16	290.171	289.727	561.033
ENSRNOG00000020201_Yif1a	ENSRNOG00000020201	171441	Yif1a	1	220470089	220474496	-0.183465	0.334572	0.807045	D	N	N	509.554	221.429	346.123	226.714	232.308	380.113	305.806	310.588	239.625	290.171	246.522	244.533
ENSRNOG00000020247_Cnih2	ENSRNOG00000020247	361705	Cnih2	1	220474493	220480132	0.0573762	0.82325	0.967354	U	N	N	162.408	38.3578	23.4354	24.6244	76.8908	174.646	17.2375	258.242	45.9995	86.8313	41.5105	99.0514
ENSRNOG00000050510_Rab1b	ENSRNOG00000050510	100126191	LOC102555167	1	220480834	220491469	0.00272619	0.984254	0.998133	U	N	N	1896.11	1225.71	1554.85	1097.91	1403.67	1777.28	1507.96	1655.89	1420.64	1558.57	1270.73	1543.04
ENSRNOG00000020299_Klc2	ENSRNOG00000020299	309159	Klc2	1	220492176	220502272	0.277476	0.138241	0.660989	U	N	N	203.01	258.044	187.483	354.931	439.259	221.904	342.196	403.939	376.554	309.955	350.722	313.405
ENSRNOG00000020350_Pacs1	ENSRNOG00000020350	171444	Pacs1	1	220516316	220644636	0.506811	0.00304799	0.143795	U	N	N	251.732	289.427	315.477	195.297	257.666	168.482	411.785	234.686	395.81	383.597	406.634	379.181
ENSRNOG00000020412_Sf3b2	ENSRNOG00000020412	293671	Sf3b2	1	220645672	220665603	0.245816	0.0154569	0.306772	U	N	N	1479.94	1606.67	1427.76	1491.9	1635.16	1945.77	1901.87	1944.66	1760.82	2253.22	1723.11	1852.57
ENSRNOG00000020455_Cst6	ENSRNOG00000020455	171096	Cst6	1	220727292	220729000	-0.114411	0.658597	0.931445	D	N	N	164.438	92.4075	108.163	125.669	157.871	184.92	79.1648	357.699	63.1156	59.3531	83.0211	83.5746
ENSRNOG00000020460_Banf1	ENSRNOG00000020460	114087	Banf1	1	220744195	220746224	-0.246133	0.196505	0.723518	D	N	N	1548.96	898.794	1005.02	825.342	783.632	1442.37	811.439	1246.71	760.596	1046.37	686.195	753.719
ENSRNOG00000020463_Eif1ad	ENSRNOG00000020463	293673	Eif1ad	1	220746387	220751684	0.00245256	0.986935	0.99829	U	N	N	426.32	307.735	310.97	293.795	305.927	304.09	286.653	355.955	257.811	450.644	311.753	284.773
ENSRNOG00000020475_Sart1	ENSRNOG00000020475	29678	Sart1	1	220762349	220771181	0.0995896	0.42498	0.85144	U	N	N	513.614	524.805	447.076	665.708	604.492	669.82	567.561	714.527	587.296	672.668	535.401	607.464
ENSRNOG00000020527_Drap1	ENSRNOG00000020527	293674	Drap1	1	220803796	220806433	-0.15599	0.378527	0.831371	D	N	N	740.985	590.188	609.321	818.549	664.205	1031.44	554.154	985.855	555.203	737.517	540.484	554.843
ENSRNOG00000020551_Bles03	ENSRNOG00000020551	266609	Bles03	1	220806473	220808804	-0.0473788	0.715366	0.945853	D	N	N	438.501	414.09	519.184	349.836	369.73	347.238	429.661	433.602	384.042	433.058	323.613	352.871
ENSRNOG00000020552_Fosl1	ENSRNOG00000020552	25445	Fosl1	1	220826560	220835066	0.15872	0.532779	0.898045	U	N	N	20.301	11.333	12.6191	13.5859	13.0878	10.2733	10.2148	13.959	13.9068	12.0904	34.7333	10.8337
ENSRNOG00000046560_AC109096.1	ENSRNOG00000046560	NA	AC109096.1	1	220836092	220836504	0.151589	0.539433	0.901072	U	N	N	24.3612	19.1789	17.1259	27.1718	21.2677	18.492	17.2375	54.0911	18.1858	21.9826	16.9431	20.8937
ENSRNOG00000020567_Fibp	ENSRNOG00000020567	282837	Fibp	1	220840118	220844405	-0.202007	0.119138	0.628864	D	N	N	464.892	368.758	437.161	469.562	382.818	443.807	408.593	462.392	285.625	367.11	361.735	318.048
ENSRNOG00000027096_Ctsw	ENSRNOG00000027096	293676	Ctsw	1	220844558	220848153	0.167535	0.510972	0.888315	U	N	N	111.655	225.788	171.259	34.8138	206.951	16.4373	194.72	43.6219	32.0927	419.868	284.644	70.4194
ENSRNOG00000020587_Efemp2	ENSRNOG00000020587	293677	Efemp2	1	220854403	220861420	-0.0612691	0.730838	0.946393	D	N	N	844.52	510.857	816.634	551.926	404.904	675.984	608.42	767.745	459.995	616.612	642.143	520.02
ENSRNOG00000020617_Mus81	ENSRNOG00000020617	293678	Mus81	1	220862386	220867815	-0.130371	0.504706	0.88677	D	N	N	101.505	79.331	99.1498	169.824	147.238	123.28	95.1255	157.039	83.4409	95.6244	116.06	100.599
ENSRNOG00000020660_Cfl1	ENSRNOG00000020660	29271	Cfl1	1	220869805	220873337	-0.18242	0.341985	0.810845	D	N	N	12347	5998.64	8026.63	7231.09	7319.35	9266.53	7074.4	8259.37	4531.49	10468.1	7156.76	5692.36
ENSRNOG00000026527_Snx32	ENSRNOG00000026527	361708	Snx32	1	220874717	220878059	-0.0526081	0.835071	0.970663	D	N	N	10.1505	8.71769	12.6191	21.2279	13.9058	8.21865	12.1301	19.1936	11.7673	8.79305	7.62439	13.1553
ENSRNOG00000020669_Ovol1	ENSRNOG00000020669	309164	Ovol1	1	220925605	220938814	-0.350583	0.144665	0.666853	D	N	N	38.5718	205.738	85.6294	134.161	131.696	80.1319	55.5431	108.182	85.5805	95.6244	72.0081	67.324
ENSRNOG00000026114_Ap5b1	ENSRNOG00000026114	361709	Ap5b1	1	220948331	220952391	0.0667304	0.588456	0.911336	U	N	N	156.317	217.071	168.555	209.732	211.859	158.209	194.081	230.324	191.486	198.943	180.444	197.329
ENSRNOG00000020700_Rnaseh2c	ENSRNOG00000020700	100361939	Rnaseh2c	1	220966655	220967825	-0.231885	0.316818	0.801599	D	N	N	99.4747	75.8439	85.6294	93.4029	70.3469	184.92	59.3736	143.952	51.3483	78.0383	63.5366	88.2177
ENSRNOG00000061012_Kat5	ENSRNOG00000061012	192218	Kat5	1	220967796	220974597	0.0489523	0.710917	0.945248	U	N	N	270.003	343.477	273.113	310.777	285.477	347.238	271.969	376.893	303.811	356.118	243.98	345.906
ENSRNOG00000030888_Rela	ENSRNOG00000030888	309165	Rela	1	220992770	221003249	0.120257	0.333591	0.807045	U	N	N	950.085	890.948	990.597	682.691	738.642	735.57	1035.53	835.795	851.526	1055.17	861.556	809.436
ENSRNOG00000020726_Sipa1	ENSRNOG00000020726	361710	Sipa1	1	221006340	221015929	0.145427	0.419174	0.849506	U	N	N	450.681	374.861	414.626	470.411	567.683	349.293	372.841	338.506	459.995	689.155	643.837	454.244
ENSRNOG00000020742_Pcnx3	ENSRNOG00000020742	309167	Pcnx3	1	221019500	221041401	0.277551	0.0143412	0.294212	U	N	N	598.878	531.779	500.256	512.867	660.934	474.627	737.382	535.677	714.597	670.47	670.946	687.943
ENSRNOG00000020773_Map3k11	ENSRNOG00000020773	309168	Map3k11	1	221043119	221056417	0.19084	0.0741205	0.550736	U	N	N	566.397	481.217	526.395	438.145	472.796	480.791	538.193	709.292	551.994	533.079	511.681	552.521
ENSRNOG00000020784_Kcnk7	ENSRNOG00000020784	499303	Kcnk7	1	221057713	221060747	-0.100239	0.702235	0.943546	D	N	N	174.588	36.6143	53.1804	50.9471	135.786	32.8746	111.725	108.182	73.8131	32.9739	67.7723	28.632
ENSRNOG00000056038_Ehbp1l1	ENSRNOG00000056038	309169	Ehbp1l1	1	221062147	221084129	0.26034	0.222784	0.741532	U	N	N	385.718	305.991	317.279	551.926	530.874	221.904	604.589	277.435	575.529	422.066	629.435	402.396
ENSRNOG00000024239_Fam89b	ENSRNOG00000024239	309170	Fam89b	1	221085895	221087449	-0.0263526	0.86725	0.977533	D	N	N	874.972	612.854	773.369	676.747	507.152	768.444	752.066	936.126	653.621	639.694	593.008	544.783
ENSRNOG00000012736_Sssca1	ENSRNOG00000012736	689397	Sssca1	1	221087803	221089586	-0.0397956	0.815869	0.965493	D	N	N	231.431	204.866	208.215	183.409	157.871	324.637	189.612	247.772	185.068	269.287	188.068	180.305
ENSRNOG00000020813_Ltbp3	ENSRNOG00000020813	83838	Ltbp3	1	221099998	221116096	0.198307	0.220192	0.741019	U	N	N	1425.13	2345.93	2096.57	2388.57	1777.49	1888.24	2780.34	1949.03	2649.78	1735.53	2865.92	1929.95
ENSRNOG00000023668_Scyl1	ENSRNOG00000023668	293684	Scyl1	1	221115860	221129654	0.292415	0.0588072	0.520463	U	N	N	304.514	435.013	296.548	517.113	513.696	499.283	450.09	547.891	586.226	568.251	535.401	529.306
ENSRNOG00000062155_Rn60_1_2212.3	ENSRNOG00000062155	NA	AC134224.2	1	221151827	221153278	-0.388511	0.133803	0.652642	D	N	N	32.4815	56.665	57.6872	78.9679	98.1584	32.8746	22.9833	82.8816	50.2785	19.7844	36.4276	16.2506
ENSRNOG00000062127_Rn60_1_2212.2	ENSRNOG00000062127	NA	AC134224.1	1	221154561	221156910	-0.468707	0.0734172	0.54935	D	N	N	196.919	761.055	463.3	1274.53	1180.36	343.129	177.482	723.251	514.552	114.31	448.992	304.119
ENSRNOG00000062158_Rn60_1_2212.4	ENSRNOG00000062158	NA	AC134224.3	1	221158098	221158792	-0.340523	0.194769	0.721732	D	N	N	83.234	196.148	135.204	300.588	296.111	135.608	53.6278	311.46	147.626	21.9826	115.213	67.324
ENSRNOG00000020881_Frmd8	ENSRNOG00000020881	309172	Frmd8	1	221213312	221233962	-0.0148195	0.918294	0.987663	D	N	N	1201.82	1315.5	1387.2	1185.37	768.09	1206.09	1100.01	1438.65	1202.41	1200.25	967.45	1075.64
ENSRNOG00000030616_Slc25a45	ENSRNOG00000030616	689625	Slc25a45	1	221236773	221244563	-0.0533419	0.696844	0.942379	D	N	N	99.4747	87.1769	110.868	84.9118	87.5246	82.1865	77.888	93.3508	87.72	102.219	94.0341	78.1577
ENSRNOG00000020892_Dpf2	ENSRNOG00000020892	361711	Dpf2	1	221253747	221269042	0.172067	0.00565485	0.189719	U	N	N	822.189	788.951	706.668	772.697	812.261	788.991	848.468	914.315	893.246	888.098	877.652	865.152
ENSRNOG00000020904_Cdc42ep2	ENSRNOG00000020904	309175	Cdc42ep2	1	221272353	221281180	-0.214972	0.360657	0.822424	D	N	N	109.625	85.4334	155.936	52.6453	43.3533	53.4213	72.1421	76.7745	51.3483	84.6331	55.065	67.324
ENSRNOG00000020906_Pola2	ENSRNOG00000020906	85242	Pola2	1	221273538	221321570	0.0557126	0.808927	0.963797	U	N	N	142.107	85.4334	67.6021	68.7785	60.531	149.99	49.7972	114.289	78.0922	125.301	103.353	126.136
ENSRNOG00000020935_Capn1	ENSRNOG00000020935	29153	Capn1	1	221346066	221370322	0.201271	0.279996	0.776593	U	N	N	842.49	909.255	895.954	897.517	783.632	856.795	1869.31	829.688	892.176	784.779	893.748	834.199
ENSRNOG00000020950_Syvn1	ENSRNOG00000020950	361712	Syvn1	1	221409271	221417886	-0.0506015	0.703968	0.943634	D	N	N	763.316	754.952	712.076	1093.66	860.522	1158.83	831.869	916.06	865.432	822.15	911.538	793.185
ENSRNOG00000020975_Mrpl49	ENSRNOG00000020975	309176	Mrpl49	1	221417336	221420115	0.0586404	0.71002	0.944593	U	N	N	87.2941	73.2286	77.5171	73.0241	85.8886	127.389	102.787	90.7335	77.0224	94.5253	94.8813	76.6101
ENSRNOG00000020982_LOC687780	ENSRNOG00000020982	687780	LOC687780	1	221420271	221421842	-0.278558	0.192257	0.718156	D	N	N	10010.4	6726.57	9663.5	6688.5	4285.43	11084.9	5992.27	10492.8	5051.39	6864.07	5082.92	4482.85
ENSRNOG00000021794_Znhit2	ENSRNOG00000021794	309177	Znhit2	1	221424383	221425664	-0.0670637	0.71211	0.945355	D	N	N	186.769	113.33	157.738	123.971	115.336	168.482	150.03	185.829	119.813	143.986	123.684	88.9915
ENSRNOG00000020989_Tm7sf2	ENSRNOG00000020989	293688	Tm7sf2	1	221425987	221431713	-0.122435	0.562206	0.904976	D	N	N	166.468	99.3817	99.1498	112.084	91.6145	158.209	127.685	180.595	83.4409	85.7322	91.4926	76.6101
ENSRNOG00000020996_Vps51	ENSRNOG00000020996	NA	AABR07072017.1	1	221430648	221440467	0.0898959	0.508854	0.888315	U	N	N	424.29	449.833	429.95	287.002	330.467	406.823	457.751	450.178	407.577	424.265	321.919	421.742
ENSRNOG00000050180_Zfpl1	ENSRNOG00000050180	684755	Zfpl1	1	221443901	221448570	-0.127731	0.378993	0.831373	D	N	N	215.19	225.788	243.368	281.907	229.854	355.457	240.048	291.394	246.044	219.826	198.234	207.389
ENSRNOG00000046635_LOC100910252	ENSRNOG00000046635	684771	Cdca5	1	221448661	221462233	-0.0620417	0.807304	0.96324	D	N	N	40.6019	24.4095	11.7177	12.7368	13.0878	24.656	10.2148	17.4488	11.7673	28.5774	19.4845	27.0844
ENSRNOG00000021003_Sac3d1	ENSRNOG00000021003	NA	Sac3d1	1	221484316	221486633	0.280388	0.0771466	0.556619	U	N	N	60.9029	68.8698	75.7144	77.2697	80.1627	96.5692	79.1648	88.1162	93.0687	132.995	88.9512	89.7653
ENSRNOG00000021007_Snx15	ENSRNOG00000021007	293691	Snx15	1	221487051	221496306	0.228045	0.140758	0.662925	U	N	N	99.4747	133.381	133.402	174.918	167.687	125.334	161.522	198.916	146.557	202.24	150.793	146.256
ENSRNOG00000021010_Arl2	ENSRNOG00000021010	65142	Arl2	1	221504170	221516110	0.0724085	0.661653	0.931445	U	N	N	170.528	174.354	147.823	186.806	148.056	223.958	168.544	251.262	146.557	219.826	182.985	138.517
ENSRNOG00000062164_Rn60_1_2216.1	ENSRNOG00000062164	NA	AC120237.2	1	221508159	221512116	-0.152794	0.514945	0.889601	D	N	N	64.9631	86.3052	51.3776	142.652	139.876	168.482	53.6278	99.4579	111.255	75.84	97.4227	126.91
ENSRNOG00000021025_Ppp2r5b	ENSRNOG00000021025	309179	Ppp2r5b	1	221597296	221605400	0.000716161	0.99667	0.999339	U	N	N	205.04	208.353	184.779	307.381	237.216	238.341	188.974	329.781	249.253	164.87	227.884	222.866
ENSRNOG00000060707_Atg2a	ENSRNOG00000060707	689688	Atg2a	1	221612584	221632267	0.200112	0.203091	0.729656	U	N	N	274.063	424.552	314.575	483.148	456.437	419.151	428.384	534.804	532.738	340.731	487.961	449.6
ENSRNOG00000043503_Ehd1	ENSRNOG00000043503	293692	Ehd1	1	221644867	221667239	-0.09155	0.664144	0.932102	D	N	N	1144.97	690.441	893.25	546.832	388.544	963.637	607.781	879.417	614.04	963.938	528.624	673.24
ENSRNOG00000027456_Cdc42bpg	ENSRNOG00000027456	293693	Cdc42bpg	1	221673590	221693518	0.230816	0.300868	0.792261	U	N	N	304.514	580.598	394.797	895.819	506.334	731.46	467.966	580.171	1100.78	515.492	690.431	855.866
ENSRNOG00000021054_Men1	ENSRNOG00000021054	29417	Men1	1	221704493	221710331	0.0621609	0.590491	0.91145	U	N	N	393.839	444.602	374.065	482.299	438.441	503.393	399.016	573.192	437.53	460.536	433.743	454.244
ENSRNOG00000021061_Map4k2	ENSRNOG00000021061	293694	Map4k2	1	221710670	221725656	0.222413	0.228469	0.744744	U	N	N	160.378	130.765	136.106	169.824	227.4	86.2959	158.968	162.273	191.486	183.555	236.356	166.375
ENSRNOG00000021085_Sf1	ENSRNOG00000021085	117855	Sf1	1	221735517	221749086	0.000181186	0.998261	0.999657	U	N	N	1709.34	1747.03	1467.42	1963.16	1922.27	1730.03	1716.09	1683.8	1797.19	1817.96	1840.87	1692.39
ENSRNOG00000021090_Pygm	ENSRNOG00000021090	24701	Pygm	1	221756286	221771143	0.181588	NA	NA	U	NA	NA	860.761	18.3072	20.7313	12.7368	16.3597	100.679	12.1301	27.0456	3579.4	64.8487	10.1658	11.6076
ENSRNOG00000021098_Rasgrp2	ENSRNOG00000021098	361714	Rasgrp2	1	221773254	221788765	-0.120713	0.609998	0.918344	D	N	N	79.1738	31.3837	50.4763	42.4559	62.167	28.7653	37.6671	39.2597	29.9532	64.8487	63.5366	26.3105
ENSRNOG00000021103_Nrxn2	ENSRNOG00000021103	116595	Nrxn2	1	221792221	221908049	0.17026	0.516391	0.890502	U	N	N	22.3311	20.9225	26.1395	6.79294	5.72591	16.4373	33.8366	28.7904	23.5346	6.59479	12.7073	15.4768
ENSRNOG00000021117_Rps6ka4	ENSRNOG00000021117	361715	Rps6ka4	1	222087326	222098297	0.0742603	0.606242	0.917156	U	N	N	842.49	499.524	687.739	522.207	564.411	636.946	692.054	663.053	570.18	781.482	709.915	540.914
ENSRNOG00000024931_Ccdc88b	ENSRNOG00000024931	293698	Ccdc88b	1	222102437	222118459	0.129623	0.614638	0.918914	U	N	N	205.04	249.326	183.878	241.149	275.662	102.733	224.087	76.7745	114.464	485.816	415.105	147.029
ENSRNOG00000021125_Prdx5	ENSRNOG00000021125	113898	Prdx5	1	222164462	222167447	0.187847	0.445628	0.862269	U	N	N	1922.5	1155.09	1312.38	1991.18	1174.63	2533.4	4224.46	1689.91	944.594	1898.2	2519.44	951.048
ENSRNOG00000021132_Trmt112	ENSRNOG00000021132	293700	Trmt112	1	222167927	222168776	-0.22611	0.203335	0.729807	D	N	N	856.701	679.108	796.804	793.076	538.235	850.631	586.075	1015.52	487.809	628.703	538.79	507.638
ENSRNOG00000021139_Esrra	ENSRNOG00000021139	293701	Esrra	1	222168730	222178725	0.0427845	0.724961	0.945853	U	N	N	294.364	283.325	346.123	406.727	343.555	388.331	390.078	356.827	317.717	369.308	393.079	301.023
ENSRNOG00000051621_Tex40	ENSRNOG00000051621	100362120	Catsperz	1	222179436	222182721	-0.283073	0.217772	0.738731	D	N	N	164.438	69.7415	106.361	258.981	125.152	242.45	132.154	85.4989	141.208	111.012	143.169	126.136
ENSRNOG00000021140_Kcnk4	ENSRNOG00000021140	116489	Kcnk4	1	222183276	222189604	-0.00229485	0.993045	0.998479	D	N	N	32.4815	42.7167	56.7858	157.087	59.7131	41.0933	67.0347	12.2141	68.4644	46.1635	165.195	31.7274
ENSRNOG00000021145_Gpr137	ENSRNOG00000021145	689984	Gpr137	1	222194266	222197252	-0.00415478	0.980807	0.996892	D	N	N	83.234	53.1779	63.9967	86.61	86.7066	84.2412	62.5657	96.8406	72.7434	73.6418	85.5626	62.681
ENSRNOG00000021147_Bad	ENSRNOG00000021147	64639	Bad	1	222198534	222207453	-0.145431	0.361466	0.822561	D	N	N	385.718	219.686	285.732	212.279	212.677	240.396	241.963	279.18	223.579	229.718	217.719	189.591
ENSRNOG00000021150_Plcb3	ENSRNOG00000021150	29322	Plcb3	1	222209575	222224910	0.278426	0.0682846	0.540317	U	N	N	416.17	474.243	394.797	606.27	656.844	495.174	631.403	470.244	745.62	577.044	714.151	634.548
ENSRNOG00000021151_Ppp1r14b	ENSRNOG00000021151	259225	Ppp1r14b	1	222229835	222231944	-0.21075	0.273591	0.772963	D	N	N	1642.35	847.36	1058.2	1021.49	804.081	1487.58	935.294	1274.63	756.317	1214.54	881.887	694.907
ENSRNOG00000021153_Fkbp2	ENSRNOG00000021153	293702	Fkbp2	1	222232351	222235102	-0.331371	0.123938	0.637364	D	N	N	570.457	394.04	507.467	478.902	354.188	980.075	325.597	642.987	313.438	442.95	326.154	395.432
ENSRNOG00000021156_Vegfb	ENSRNOG00000021156	89811	Vegfb	1	222239022	222242644	0.0868944	0.616469	0.919357	U	N	N	107.595	149.073	149.626	135.01	116.972	133.553	121.301	218.109	148.696	103.318	133.85	126.136
ENSRNOG00000043060_Dnajc4	ENSRNOG00000043060	361717	Dnajc4	1	222242858	222246768	-0.0426509	0.83379	0.970271	D	N	N	50.7524	67.1262	71.2076	70.4768	66.2569	102.733	73.419	112.544	62.0458	58.2539	47.4406	57.2641
ENSRNOG00000021158_Nudt22	ENSRNOG00000021158	293703	Nudt22	1	222247502	222250980	-0.139402	0.508058	0.888315	D	N	N	133.986	88.9205	122.585	118.027	98.1584	195.193	107.256	186.702	94.1385	108.814	94.0341	73.5147
ENSRNOG00000023023_Trpt1	ENSRNOG00000023023	293704	Trpt1	1	222250995	222255994	-0.0549488	0.81149	0.964539	D	N	N	46.6922	42.7167	49.5749	99.3468	74.4368	53.4213	34.475	76.7745	86.6502	38.4696	62.6894	52.6211
ENSRNOG00000021161_Fermt3	ENSRNOG00000021161	309186	Fermt3	1	222254184	222272285	0.16251	0.532179	0.897797	U	N	N	460.832	242.352	355.137	199.543	344.373	139.717	306.444	111.672	139.068	780.383	537.943	245.307
ENSRNOG00000021164_Stip1	ENSRNOG00000021164	192277	Stip1	1	222274133	222293148	0.114201	0.445985	0.862269	U	N	N	1138.88	1045.25	938.318	1233.77	1547.63	1584.15	1214.29	1343.55	1236.64	1780.59	1335.11	1254.39
ENSRNOG00000021174_Macrod1	ENSRNOG00000021174	246233	Macrod1	1	222310920	222451484	0.063249	0.792852	0.959406	U	N	N	87.2941	157.79	172.16	158.785	54.8051	189.029	99.5944	212.875	220.37	122.004	83.0211	135.422
ENSRNOG00000021175_Otub1	ENSRNOG00000021175	293705	Otub1	1	222451674	222459952	-0.101444	0.447354	0.862269	D	N	N	915.574	755.824	731.906	853.363	790.993	1017.06	875.282	957.937	665.388	866.115	694.666	626.036
ENSRNOG00000021177_Cox8a	ENSRNOG00000021177	171335	Cox8a	1	222466575	222468896	-0.338424	0.0920418	0.582405	D	N	N	3721.17	1838.56	2660.82	2412.34	1959.08	4298.36	1880.8	3090.17	1801.47	2349.94	1703.63	1865.73
ENSRNOG00000021179_Naa40	ENSRNOG00000021179	361718	Naa40	1	222478021	222495382	-0.15783	0.266193	0.770977	D	N	N	300.454	219.686	185.681	234.356	265.846	281.489	181.313	262.604	204.323	208.835	206.706	247.628
ENSRNOG00000021184_Mark2	ENSRNOG00000021184	60328	Mark2	1	222525990	222590220	0.169339	0.277015	0.775843	U	N	N	450.681	674.749	504.763	613.063	727.19	591.743	591.821	534.804	921.06	581.44	684.5	752.172
ENSRNOG00000025061_RGD1308106	ENSRNOG00000025061	361719	Spindoc	1	222606839	222628645	0.047027	0.805085	0.962422	U	N	N	77.1437	153.431	91.0376	176.616	148.056	125.334	112.363	170.998	129.44	123.103	113.519	159.411
ENSRNOG00000032042_RGD1560108	ENSRNOG00000032042	499309	RGD1560108	1	222672501	222677372	-0.00377707	0.985539	0.998133	D	N	N	196.919	305.119	274.915	463.618	375.456	291.762	213.873	489.438	376.554	211.033	295.657	321.143
ENSRNOG00000021202_Rtn3	ENSRNOG00000021202	140945	Rtn3	1	222677365	222734241	-0.169657	0.271031	0.772661	D	N	N	2848.23	1896.1	2450.8	1479.16	1914.09	2529.29	2308.55	1980.43	1707.33	1727.83	1712.95	2068.47
ENSRNOG00000021203_Atl3	ENSRNOG00000021203	309187	Atl3	1	222746023	222786942	0.192559	0.420755	0.849862	U	N	N	562.337	419.321	495.749	154.539	261.756	219.849	644.172	215.492	436.46	353.92	443.909	455.017
ENSRNOG00000021206_Pla2g16	ENSRNOG00000021206	24913	Pla2g16	1	222844144	222877193	0.223895	0.342821	0.810845	U	N	N	509.554	568.394	554.338	302.286	454.801	318.473	492.865	508.631	350.88	1246.41	365.971	396.979
ENSRNOG00000021207_Lgals12	ENSRNOG00000021207	293710	Lgals12	1	222891626	222902320	0.318907	0.218419	0.738731	U	N	N	10.1505	19.1789	8.11226	22.9262	25.3576	14.3826	32.5597	25.3007	33.1624	6.59479	17.7902	31.7274
ENSRNOG00000023528_Hrasls5	ENSRNOG00000023528	293711	Hrasls5	1	222907159	222937633	0.00805685	0.975166	0.996067	U	N	N	12.1806	4.35885	4.50681	10.1894	8.17987	8.21865	10.2148	9.59682	7.48829	6.59479	5.08292	6.96455
ENSRNOG00000017884_AABR07006160.1	ENSRNOG00000017884	NA	AABR07006160.1	1	223549179	223549904	-0.0945636	0.718895	0.945853	D	N	N	6.09029	11.333	11.7177	7.64206	4.90792	14.3826	10.8532	0.872438	6.41853	10.9913	5.93008	13.1553
ENSRNOG00000018487_Slc3a2	ENSRNOG00000018487	50567	Slc3a2	1	224906554	224921092	-0.184753	0.269465	0.771609	D	N	N	3512.07	2902.12	4023.68	3760.74	1998.34	4337.39	2990.39	2946.22	3555.87	3077.57	2283.93	2911.18
ENSRNOG00000042878_Wdr74	ENSRNOG00000042878	690229	Wdr74	1	224933529	224938662	-0.0504977	0.748153	0.947826	D	N	N	265.943	247.582	218.13	256.434	215.949	339.019	252.178	327.164	195.765	280.278	194.845	225.187
ENSRNOG00000018847_Stx5	ENSRNOG00000018847	65134	Stx5	1	224939497	224955657	-0.167711	0.1699	0.696796	D	N	N	562.337	554.445	584.984	599.477	473.614	729.406	541.385	613.324	498.506	513.294	418.494	502.995
ENSRNOG00000019069_Nxf1	ENSRNOG00000019069	59087	Nxf1	1	224957517	224970727	-0.185604	0.425351	0.851827	D	N	N	442.561	828.181	528.198	1687.2	1324.32	949.255	534.362	784.322	1011.99	669.371	1052.17	784.673
ENSRNOG00000019266_Tmem223	ENSRNOG00000019266	690285	Tmem223	1	224970807	224972168	-0.24663	0.192422	0.718156	D	N	N	704.443	436.756	557.042	385.499	388.544	663.656	492.226	615.941	332.694	425.364	352.416	335.072
ENSRNOG00000019341_Tmem179b	ENSRNOG00000019341	690263	Tmem179b	1	224972218	224974203	-0.151322	0.314518	0.800141	D	N	N	324.815	245.839	283.929	266.623	202.043	273.27	234.941	312.333	210.742	252.8	227.884	177.983
ENSRNOG00000019419_Taf6l	ENSRNOG00000019419	309194	Taf6l	1	224974208	224986291	0.166993	0.268616	0.77118	U	N	N	129.926	116.817	99.1498	121.424	108.792	139.717	111.086	162.273	125.161	173.663	116.06	119.945
ENSRNOG00000019439_Polr2g	ENSRNOG00000019439	117017	Polr2g	1	224991222	224994653	-0.130969	0.433613	0.857159	D	N	N	964.296	546.599	718.385	624.951	611.854	856.795	666.517	848.009	499.576	756.202	601.479	519.246
ENSRNOG00000019461_Zbtb3	ENSRNOG00000019461	499313	Zbtb3	1	224998172	225000489	-0.0516525	0.812609	0.965092	D	N	N	30.4514	19.1789	23.4354	13.5859	26.1756	26.7106	24.2602	21.8109	23.5346	19.7844	24.5675	15.4768
ENSRNOG00000019464_Ttc9c	ENSRNOG00000019464	309196	Ttc9c	1	225005017	225014538	-0.0785513	0.518175	0.891833	D	N	N	655.721	457.679	470.511	455.976	457.255	415.042	467.966	445.816	376.554	501.204	465.935	481.328
ENSRNOG00000019507_Hnrnpul2	ENSRNOG00000019507	309197	Hnrnpul2	1	225015616	225027710	0.279396	0.00470193	0.173477	U	N	N	1063.77	1216.99	1086.14	925.538	1145.18	1097.19	1338.78	1079.21	1332.92	1472.84	1356.29	1412.26
ENSRNOG00000019570_Gng3	ENSRNOG00000019570	114117	Gng3	1	225033921	225035687	0.239691	0.293517	0.786924	U	N	N	46.6922	30.5119	27.0409	20.3788	34.3555	22.6013	40.2208	52.3463	43.86	19.7844	25.4146	41.7873
ENSRNOG00000052393_Bscl2	ENSRNOG00000052393	361722	Bscl2	1	225037737	225046040	-0.0577174	0.740464	0.947826	D	N	N	381.658	244.967	292.041	245.395	257.666	382.167	327.512	396.959	224.649	285.774	262.618	214.353
ENSRNOG00000026302_Lrrn4cl	ENSRNOG00000026302	690329	Lrrn4cl	1	225048149	225051696	0.0414376	0.874944	0.978819	U	N	N	56.8427	190.917	266.803	25.4735	113.7	59.5852	255.37	145.697	112.324	73.6418	72.8552	96.7299
ENSRNOG00000019666_Ubxn1	ENSRNOG00000019666	293719	Ubxn1	1	225068009	225071945	-0.057683	0.708149	0.944228	D	N	N	988.657	899.666	879.729	984.127	708.377	1156.78	909.757	1234.5	789.48	973.83	778.535	680.978
ENSRNOG00000045561_Uqcc3	ENSRNOG00000045561	690344	Uqcc3	1	225076301	225077079	-0.209261	0.208	0.732078	D	N	N	326.846	276.351	296.548	320.117	225.764	343.129	272.608	368.169	259.951	192.348	223.649	196.555
ENSRNOG00000019701_RGD1597339	ENSRNOG00000019701	690349	RGD1597339	1	225085282	225087266	-0.213095	0.265139	0.770646	D	N	N	300.454	198.763	257.79	298.04	206.951	402.714	201.743	331.526	181.858	289.071	193.998	192.686
ENSRNOG00000026005_Ints5	ENSRNOG00000026005	309200	Ints5	1	225091612	225096390	0.0404975	0.790436	0.958987	U	N	N	625.27	413.219	482.229	323.514	343.555	384.222	472.435	489.438	418.274	457.238	400.704	403.944
ENSRNOG00000019724_Ganab	ENSRNOG00000019724	293721	Ganab	1	225096598	225116378	-0.0442485	0.675671	0.936902	D	N	N	4236.81	3303.13	3965.09	3000.78	3298.12	3451.83	4082.73	3290.84	3274.52	3287.5	3380.14	3255.54
ENSRNOG00000019804_B3gat3	ENSRNOG00000019804	293722	B3gat3	1	225120061	225126579	0.0456296	0.721635	0.945853	U	N	N	493.313	427.167	440.766	352.384	368.912	412.987	501.164	459.775	361.577	460.536	450.686	338.168
ENSRNOG00000019858_Rom1	ENSRNOG00000019858	309201	Rom1	1	225126734	225128740	0.189075	0.419027	0.849449	U	N	N	50.7524	20.9225	32.449	22.9262	21.2677	24.656	36.3903	54.0911	24.6044	31.8748	33.8862	20.8937
ENSRNOG00000019873_Eml3	ENSRNOG00000019873	102551660	Eml3	1	225129097	225140428	-0.00827817	0.966316	0.995466	D	N	N	330.906	345.221	323.589	668.256	476.068	320.528	374.756	376.021	476.041	274.783	547.262	404.718
ENSRNOG00000019913_Mta2	ENSRNOG00000019913	361724	Mta2	1	225140863	225149583	0.18209	0.030742	0.413352	U	N	N	1086.1	1046.12	1025.75	1126.78	1282.6	1078.7	1307.5	1223.16	1102.92	1362.92	1313.09	1261.36
ENSRNOG00000020047_Tut1	ENSRNOG00000020047	499314	Tut1	1	225151404	225162595	0.171052	0.133924	0.652808	U	N	N	211.13	271.992	253.283	295.493	270.754	299.981	320.49	328.037	282.415	348.425	263.465	278.582
ENSRNOG00000020075_Eef1g	ENSRNOG00000020075	293725	Eef1g	1	225163391	225173995	-0.138143	0.423588	0.851372	D	N	N	16175.8	13412.2	16782.5	11224.5	9858.38	17002.3	12383.5	17584.9	10516.8	14726.2	10707.2	9797.58
ENSRNOG00000057569_Ahnak	ENSRNOG00000057569	191572	Ahnak	1	225184939	225215015	-0.0665944	0.789196	0.958533	D	N	N	5753.29	15748.5	10723.5	27170.1	14037.5	8756.98	10287.6	7471.56	21168.3	6700.3	14939.6	16082.7
ENSRNOG00000020202_Asrgl1	ENSRNOG00000020202	246307	Asrgl1	1	225309246	225329770	-0.219349	0.370904	0.826471	D	N	N	105.565	56.665	73.0103	44.1541	40.0814	143.826	55.5431	84.6265	47.0692	54.9565	33.8862	87.4438
ENSRNOG00000023151_Scgb2a1	ENSRNOG00000023151	361725	Scgb2a1	1	225899313	225902676	-0.147254	0.384766	0.834798	D	N	N	2.0301	0	31.5477	2.54735	0	137.662	1.91528	11.3417	7.48829	1.09913	0.847154	52.6211
ENSRNOG00000032929_Incenp	ENSRNOG00000032929	293733	Incenp	1	225925773	225952516	0.0913881	0.692402	0.941999	U	N	N	241.581	175.226	124.388	205.486	207.769	439.698	123.855	237.303	269.578	237.412	287.185	355.966
ENSRNOG00000020346_Best1	ENSRNOG00000020346	293735	Best1	1	226030875	226049929	-0.101731	0.663207	0.932013	D	N	N	1975.28	1164.68	2831.18	1001.96	968.497	2868.31	1541.16	1008.54	2258.25	1380.51	1725.65	1895.13
ENSRNOG00000022619_Fth1	ENSRNOG00000022619	689130	Fth1	1	226030938	226033228	-0.352563	0.147452	0.670784	D	N	N	32325.2	18988.9	49538.9	18616.1	15158.9	71732.4	23785.2	20093.1	30307.2	21822.1	22538.5	26203
ENSRNOG00000020349_Rab3il1	ENSRNOG00000020349	171452	Rab3il1	1	226077120	226084830	0.109433	0.665288	0.932479	U	N	N	83.234	88.0487	138.81	32.2665	51.5332	22.6013	109.171	60.1982	50.2785	87.9305	88.104	75.0624
ENSRNOG00000020385_Fads3	ENSRNOG00000020385	286922	Fads3	1	226091774	226108332	0.0605716	0.788316	0.958397	U	N	N	198.949	66.2545	84.728	61.9856	60.531	69.8586	105.34	99.4579	82.3712	85.7322	103.353	87.4438
ENSRNOG00000020440_Fads2	ENSRNOG00000020440	83512	Fads2	1	226114413	226152524	0.107936	0.662149	0.931445	U	N	N	1234.3	753.209	1146.53	459.373	391.816	1288.27	1077.02	415.28	1312.59	700.146	849.696	1533.75
ENSRNOG00000020480_Fads1	ENSRNOG00000020480	84575	Fads1	1	226234074	226249138	0.0755947	0.772343	0.954172	U	N	N	1680.92	1193.45	1576.48	1142.06	591.405	4789.42	1839.31	1034.71	2363.09	1014.5	1669.74	4127.66
ENSRNOG00000020531_Fen1	ENSRNOG00000020531	84490	Fen1	1	226251518	226255886	-0.00298381	0.989442	0.99829	D	N	N	296.394	188.302	107.262	147.746	150.51	310.254	125.131	227.706	172.231	293.468	160.959	209.71
ENSRNOG00000028274_Myrf	ENSRNOG00000028274	293736	Myrf	1	226260558	226292480	0.192233	0.413349	0.847349	U	N	N	22.3311	20.0507	19.83	19.5297	34.3555	10.2733	22.9833	26.1731	16.0463	38.4696	21.1789	30.9536
ENSRNOG00000027264_Dagla	ENSRNOG00000027264	309207	Dagla	1	226297016	226353611	-0.120236	0.539921	0.901072	D	N	N	54.8126	80.2028	65.7994	119.726	125.97	94.5145	67.0347	71.5399	89.8595	76.9392	83.0211	106.016
ENSRNOG00000026432_Syt7	ENSRNOG00000026432	59267	Syt7	1	226435979	226493377	0.191611	0.466581	0.870228	U	N	N	91.3543	32.2555	30.6463	56.8909	174.231	14.3826	141.092	56.7085	112.324	38.4696	90.6455	82.0269
ENSRNOG00000020646_Sdhaf2	ENSRNOG00000020646	361726	Sdhaf2	1	226547531	226572349	-0.0561624	0.63198	0.923709	D	N	N	383.688	539.625	511.974	534.944	540.689	577.36	518.402	519.973	420.414	584.738	457.463	469.72
ENSRNOG00000020668_Cpsf7	ENSRNOG00000020668	365407	Cpsf7	1	226573105	226596131	-0.0837682	0.619696	0.91971	D	N	N	477.073	614.597	462.399	842.325	728.008	443.807	474.989	540.911	655.76	462.734	632.824	584.248
ENSRNOG00000020692_Tmem216	ENSRNOG00000020692	361727	Tmem216	1	226601201	226606344	-0.139509	0.34935	0.81468	D	N	N	168.498	158.662	175.766	188.504	184.047	170.537	142.369	228.579	149.766	119.805	150.793	150.125
ENSRNOG00000020693_Tmem138	ENSRNOG00000020693	361728	Tmem138	1	226623861	226630900	-0.214478	0.298207	0.790551	D	N	N	105.565	67.1262	61.2926	87.4591	48.2612	96.5692	52.9894	97.713	50.2785	61.5513	66.9252	52.6211
ENSRNOG00000020702_Cyb561a3	ENSRNOG00000020702	361729	Cyb561a3	1	226634009	226642243	0.0489214	0.827846	0.968955	U	N	N	408.049	254.557	338.912	202.939	255.212	197.248	259.839	253.879	190.417	568.251	263.465	196.555
ENSRNOG00000020704_Tkfc	ENSRNOG00000020704	361730	Tkfc	1	226644200	226657408	-0.0855559	0.58856	0.911336	D	N	N	215.19	148.201	182.976	148.596	208.587	269.161	197.912	210.257	149.766	187.951	182.138	157.863
ENSRNOG00000020715_Ddb1	ENSRNOG00000020715	64470	Ddb1	1	226657561	226683347	0.144011	0.325193	0.804764	U	N	N	5111.78	3745.12	4410.36	2603.39	3914.07	4006.59	5158.48	3628.47	4204.14	4807.6	4256.95	4465.05
ENSRNOG00000046439_NEWGENE_1309258	ENSRNOG00000046439	308178	Vps37c	1	226742343	226767868	-0.0034438	0.975807	0.996067	D	N	N	274.063	342.605	286.633	357.479	318.197	295.872	287.93	344.613	314.508	347.325	332.084	256.141
ENSRNOG00000020872_LOC100911215	ENSRNOG00000020872	54236	Cd5	1	226770744	226791879	0.0625194	0.811573	0.964539	U	N	N	180.679	145.585	164.048	141.803	256.03	32.8746	218.342	37.5148	35.3019	345.127	288.032	89.7653
ENSRNOG00000020884_Cd6	ENSRNOG00000020884	25752	Cd6	1	226848403	226887156	0.119174	0.650646	0.929502	U	N	N	123.836	146.457	141.514	102.743	204.497	43.1479	168.544	28.7904	48.139	279.179	291.421	85.8961
ENSRNOG00000021644_Slc15a3	ENSRNOG00000021644	246239	Slc15a3	1	226897625	226912708	0.256794	0.307245	0.795849	U	N	N	215.19	142.098	190.187	104.441	107.156	123.28	169.821	123.014	96.278	489.113	159.265	124.588
ENSRNOG00000021338_Tmem132a	ENSRNOG00000021338	338474	Tmem132a	1	226912612	226924244	0.332851	0.0193421	0.346223	U	N	N	1256.63	1242.27	998.709	1162.44	1288.33	1573.87	2168.73	1288.59	1708.4	1522.3	1576.55	1387.49
ENSRNOG00000028017_Tmem109	ENSRNOG00000028017	361732	Tmem109	1	226925117	226935689	-0.00349373	0.984894	0.998133	D	N	N	1380.47	795.925	1178.98	659.764	624.942	924.599	1031.06	820.091	1079.38	1056.26	764.133	790.09
ENSRNOG00000020897_Prpf19	ENSRNOG00000020897	246216	Prpf19	1	226947105	226958144	0.073897	0.476242	0.873024	U	N	N	1806.79	1537.8	1519.7	1599.74	1442.11	1777.28	1686.72	1723.06	1568.26	2118.03	1528.27	1577.08
ENSRNOG00000020925_Ccdc86	ENSRNOG00000020925	293738	Ccdc86	1	226996237	227002139	0.321045	0.0671669	0.539182	U	N	N	107.595	172.61	109.065	191.901	155.418	174.646	195.358	205.895	166.882	260.494	205.858	146.256
ENSRNOG00000045611_LOC100911403	ENSRNOG00000045611	361734	Ms4a4a	1	227217552	227232341	0.0581264	0.819968	0.966184	U	N	N	93.3844	68.8698	52.279	9.34029	13.9058	6.16399	71.5037	12.2141	17.1161	89.0296	50.8292	29.4059
ENSRNOG00000050395_Ms4a6e	ENSRNOG00000050395	293749	Ms4a6e	1	227240383	227252250	-0.322795	0.206828	0.732075	D	N	N	107.595	150.816	217.228	80.6662	143.966	135.608	114.917	0	42.7902	129.697	83.0211	102.147
ENSRNOG00000056620_AABR07006263.1	ENSRNOG00000056620	NA	AABR07006263.1	1	227287194	227290294	0.486989	0.0452573	0.480979	U	N	N	6.09029	12.2048	10.8163	4.24559	20.4497	4.10933	18.5144	2.61731	7.48829	100.021	27.1089	13.1553
ENSRNOG00000025805_Ms4a14	ENSRNOG00000025805	293743	Ms4a14	1	227471436	227486976	-0.0430162	0.860575	0.975839	D	N	N	6.09029	10.4612	5.40817	9.34029	23.7216	4.10933	2.5537	0.872438	4.27902	5.49565	33.8862	7.73839
ENSRNOG00000020953_Ms4a7	ENSRNOG00000020953	293744	Ms4a7	1	227490777	227506822	-0.0081121	0.975237	0.996067	D	N	N	554.216	152.56	399.303	90.8556	187.319	129.444	227.28	54.9636	68.4644	578.143	433.743	130.779
ENSRNOG00000050024_Ms4a4a	ENSRNOG00000050024	361734	Ms4a4e	1	227592635	227607042	-0.196669	0.454151	0.86519	D	N	N	420.23	226.66	277.619	26.3226	75.2548	168.482	282.184	83.754	94.1385	196.744	138.933	112.207
ENSRNOG00000020997_Ms4a4c	ENSRNOG00000020997	293746	Ms4a4c	1	227640680	227661311	0.14518	0.562682	0.905158	U	N	N	77.1437	72.3569	92.8403	60.2873	113.7	4.10933	113.001	15.7039	10.6976	250.602	133.003	39.4658
ENSRNOG00000047349_Ms4a6c	ENSRNOG00000047349	NA	AABR07006269.1	1	227670159	227680128	0.0709991	0.781078	0.957169	U	N	N	83.234	57.5368	103.657	53.4944	108.792	16.4373	98.3176	8.72438	7.48829	191.249	125.379	51.8472
ENSRNOG00000042133_Gm8369	ENSRNOG00000042133	NA	AABR07006275.1	1	227743612	227904767	0.0101655	0.96774	0.995466	U	N	N	6.09029	4.35885	2.70409	5.09471	9.81584	2.05466	7.66111	4.36219	0	10.9913	6.77723	1.54768
ENSRNOG00000030689_Ms4a6bl	ENSRNOG00000030689	100912573	Ms4a6bl	1	227757425	227818305	0.169028	0.502532	0.885191	U	N	N	738.955	191.789	353.334	90.0065	230.672	20.5466	394.547	111.672	89.8595	1092.54	396.468	163.28
ENSRNOG00000020980_AABR07006278.1	ENSRNOG00000020980	NA	AABR07006278.1	1	227892956	227904737	0.260447	0.313953	0.799128	U	N	N	20.301	20.9225	39.6599	4.24559	10.6338	6.16399	32.5597	6.10706	22.4649	67.047	14.4016	17.0245
ENSRNOG00000020991_Ms4a6a	ENSRNOG00000020991	361735	Ms4a6a	1	227919301	227932603	0.0587921	NA	NA	U	NA	NA	787.677	176.097	312.773	147.746	216.767	166.428	208.127	112.544	84.5107	1182.66	238.05	164.828
ENSRNOG00000020993_Ms4a2	ENSRNOG00000020993	25316	Ms4a2	1	227957302	227965386	-0.150434	0.538311	0.90063	D	N	N	20.301	34.8708	3.60545	11.0385	67.0749	8.21865	10.2148	55.836	12.8371	3.29739	3.38862	19.346
ENSRNOG00000021005_Mrpl16	ENSRNOG00000021005	293754	Mrpl16	1	228142778	228147579	0.0223275	0.874371	0.97863	U	N	N	304.514	231.891	247.875	228.413	227.4	312.309	238.771	342.868	228.928	286.873	245.675	223.639
ENSRNOG00000021013_Stx3	ENSRNOG00000021013	81802	Stx3	1	228149867	228194977	-0.130996	0.573839	0.908458	D	N	N	300.454	285.069	321.786	343.044	901.422	209.576	360.072	273.945	404.368	337.433	394.774	321.143
ENSRNOG00000021052_Patl1	ENSRNOG00000021052	361736	Patl1	1	228337767	228369761	0.0166458	0.900873	0.983317	U	N	N	334.966	401.886	312.773	464.467	468.707	353.402	331.981	367.296	434.321	374.804	459.157	408.587
ENSRNOG00000021057_Osbp	ENSRNOG00000021057	365410	Osbp	1	228395558	228425361	0.180332	0.0790178	0.56105	U	N	N	812.039	927.563	855.392	758.262	1002.03	883.505	1002.33	849.754	1146.78	935.36	953.895	1084.15
ENSRNOG00000021084_AABR07006310.1	ENSRNOG00000021084	64552	AABR07006310.1	1	228724900	228727160	0.305599	0.239192	0.751748	U	N	N	1402.8	625.059	1062.71	101.045	403.268	232.177	1082.13	277.435	494.227	2833.56	941.188	629.905
ENSRNOG00000021086_Dtx4	ENSRNOG00000021086	293774	Dtx4	1	228732985	228755866	0.0101906	0.963187	0.994451	U	N	N	46.6922	54.9215	59.4899	18.6806	34.3555	36.9839	39.5824	38.3873	36.3717	50.56	37.2748	51.0734
ENSRNOG00000060420_AABR07006311.1	ENSRNOG00000060420	NA	AABR07006311.1	1	228785961	228815673	-0.241859	0.331881	0.807045	D	N	N	22.3311	18.3072	28.8436	0.849118	13.0878	2.05466	19.1528	4.36219	3.20927	13.1896	7.62439	4.64303
ENSRNOG00000012067_Fam111a	ENSRNOG00000012067	499322	Fam111a	1	229003961	229019527	-0.254258	0.309968	0.797798	D	N	N	239.551	103.741	100.051	134.161	94.8865	332.855	66.3963	123.886	70.6039	186.852	139.78	173.34
ENSRNOG00000050414_AABR07006333.1	ENSRNOG00000050414	NA	AABR07006333.1	1	229206153	229206780	0.253453	0.325651	0.804764	U	N	N	12.1806	19.1789	14.4218	13.5859	10.6338	8.21865	29.3676	10.4693	9.6278	17.5861	10.1658	27.8582
ENSRNOG00000048953_LOC100910851	ENSRNOG00000048953	361319	LOC100910851	1	229267916	229343584	0.117882	0.459514	0.866548	U	N	N	0	18.3072	0	37.3612	8.99786	0	25.537	0	0	3.29739	83.8683	28.632
ENSRNOG00000012460_Cntf	ENSRNOG00000012460	25707	Cntf	1	229599009	229601032	-0.233659	0.334128	0.807045	D	N	N	22.3311	27.0248	18.0272	39.9085	14.7238	32.8746	12.7685	32.2802	21.3951	16.487	16.9431	22.4413
ENSRNOG00000012524_Zfp91	ENSRNOG00000012524	246282	Zfp91	1	229602499	229639187	-0.0657755	0.54214	0.901502	D	N	N	775.497	1056.58	913.08	1042.72	1112.46	1025.28	1038.72	895.121	873.99	851.826	924.245	1072.54
ENSRNOG00000012611_Lpxn	ENSRNOG00000012611	293783	Lpxn	1	229642412	229674134	-0.124643	0.634288	0.924836	D	N	N	590.758	300.76	556.14	217.374	358.278	127.389	414.338	85.4989	109.115	500.105	512.528	212.806
ENSRNOG00000013239_Tle4	ENSRNOG00000013239	25565	Tle4	1	231393379	231530786	-0.0987101	0.535009	0.899319	D	N	N	582.638	456.807	619.236	679.294	519.422	501.338	513.933	341.123	564.831	707.84	476.948	511.508
ENSRNOG00000013971_Psat1	ENSRNOG00000013971	293820	Psat1	1	233124092	233145941	-0.28129	0.281754	0.777385	D	N	N	844.52	251.941	267.704	186.806	211.859	1012.95	162.799	526.952	226.788	472.626	188.068	364.478
ENSRNOG00000014041_Cep78	ENSRNOG00000014041	60347	Cep78	1	233186989	233214758	0.116953	0.518446	0.891851	U	N	N	91.3543	82.8181	49.5749	92.5538	95.7045	90.4052	69.5884	107.31	70.6039	107.715	95.7284	99.0514
ENSRNOG00000014183_Gnaq	ENSRNOG00000014183	81666	Gnaq	1	233382708	233622786	0.460775	0.028922	0.403438	U	N	N	213.16	202.25	183.878	111.234	193.045	195.193	393.909	156.166	344.461	176.96	227.884	334.298
ENSRNOG00000013053_Trpm6	ENSRNOG00000013053	293874	Trpm6	1	234479289	234596971	-0.0890414	0.73487	0.947134	D	N	N	2.0301	23.5378	4.50681	18.6806	9.81584	8.21865	11.4917	1.74488	12.8371	8.79305	12.7073	12.3814
ENSRNOG00000025644_LOC499331	ENSRNOG00000025644	499331	LOC499331	1	234665905	234670113	-0.209321	0.103805	0.606683	D	N	N	211.13	231.019	246.072	203.788	188.955	182.865	192.166	213.747	143.347	197.844	160.959	177.209
ENSRNOG00000012872_Carnmt1	ENSRNOG00000012872	293871	Carnmt1	1	234677692	234704792	-0.145082	0.39383	0.838238	D	N	N	180.679	118.561	135.204	84.0626	118.608	94.5145	111.086	91.606	96.278	112.111	109.283	126.91
ENSRNOG00000012665_Nmrk1	ENSRNOG00000012665	499330	Nmrk1	1	234721974	234749447	-0.134212	0.525884	0.895458	D	N	N	50.7524	32.2555	57.6872	25.4735	57.2591	41.0933	44.6898	41.877	39.581	38.4696	26.2618	43.335
ENSRNOG00000012156_Ostf1	ENSRNOG00000012156	259275	Ostf1	1	234749568	234796739	-0.197001	0.351204	0.815961	D	N	N	1142.94	682.595	1000.51	557.021	644.574	725.296	720.144	425.75	517.762	1096.93	759.05	482.876
ENSRNOG00000014840_Gna14	ENSRNOG00000014840	309242	Gna14	1	235166718	235347937	-0.192068	0.458175	0.866104	D	N	N	105.565	287.684	237.058	163.031	36.8094	168.482	151.945	66.3053	234.276	84.6331	93.1869	167.149
ENSRNOG00000046420_AABR07006458.1	ENSRNOG00000046420	NA	AABR07006458.1	1	235387153	235405831	0.170497	0.469079	0.870791	U	N	N	30.4514	66.2545	48.6735	68.7785	79.3447	28.7653	64.481	27.918	68.4644	81.3357	66.078	78.9316
ENSRNOG00000025539_Vps13a	ENSRNOG00000025539	309243	Vps13a	1	235653121	235813030	0.0876244	0.71327	0.945682	U	N	N	95.4145	210.968	116.276	182.56	242.124	106.843	192.166	66.3053	178.649	147.284	189.763	270.07
ENSRNOG00000012036_Pcsk5	ENSRNOG00000012036	116548	Pcsk5	1	236031988	236313858	-0.118284	0.632912	0.924463	D	N	N	117.746	136.868	228.045	77.2697	107.974	67.8039	105.34	207.64	56.6971	127.499	67.7723	88.2177
ENSRNOG00000022273_Rfk	ENSRNOG00000022273	499328	Rfk	1	236494221	236501733	-0.188194	0.273192	0.77289	D	N	N	464.892	308.606	431.752	269.17	268.3	347.238	390.717	341.996	257.811	283.576	224.496	294.833
ENSRNOG00000058389_AABR07006475.1	ENSRNOG00000058389	NA	AABR07006475.1	1	236547584	236579222	0.462744	0.0695697	0.541328	U	N	N	10.1505	6.97415	6.30953	9.34029	3.27195	6.16399	12.1301	8.72438	9.6278	12.0904	11.013	14.7029
ENSRNOG00000050534_Gcnt1	ENSRNOG00000050534	64043	Gcnt1	1	236580034	236585035	-0.18238	0.357467	0.820088	D	N	N	466.922	352.195	657.093	619.007	269.118	482.846	406.039	277.435	382.973	447.346	382.914	547.104
ENSRNOG00000015088_Prune2	ENSRNOG00000015088	NA	Prune2	1	236680098	236729412	-0.0810804	0.758875	0.951296	D	N	N	22.3311	34.8708	27.9422	15.2841	20.4497	0	27.4523	6.10706	11.7673	19.7844	27.1089	17.0245
ENSRNOG00000017469_Anxa1	ENSRNOG00000017469	25380	Anxa1	1	237893966	237910012	-0.262316	0.269164	0.771417	D	N	N	15980.9	17174.7	10471.1	13782.9	17738	17984.5	22512.8	6405.44	18425.5	5459.38	9640.61	9780.55
ENSRNOG00000017619_Aldh1a1	ENSRNOG00000017619	24188	Aldh1a1	1	238222521	238264330	0.280318	NA	NA	U	NA	NA	2.0301	6.97415	9.91498	4.24559	1.63597	8.21865	3.19213	7217.68	38.5112	58.2539	0	2.32152
ENSRNOG00000018107_Zfand5	ENSRNOG00000018107	293960	Zfand5	1	238843338	238852566	-0.363628	0.00947771	0.24052	D	N	N	917.604	1404.42	1195.21	1164.99	965.225	1298.55	1086.6	1005.05	737.062	921.072	758.203	778.482
ENSRNOG00000018282_Gda	ENSRNOG00000018282	83585	Gda	1	238982392	239057732	0.198717	0.445501	0.862269	U	N	N	627.3	579.727	830.154	187.655	240.488	104.788	825.485	241.665	417.205	734.219	520.153	536.27
ENSRNOG00000027161_RGD1359158	ENSRNOG00000027161	361740	RGD1359158	1	239207869	239265997	-0.350593	0.0510982	0.498049	D	N	N	339.026	263.274	371.361	291.247	193.863	462.299	277.715	256.497	188.277	271.485	208.4	239.89
ENSRNOG00000012514_Abhd17b	ENSRNOG00000012514	309399	Abhd17b	1	239266921	239301176	-0.276081	0.190009	0.716367	D	N	N	432.411	336.503	421.837	333.703	312.471	297.926	552.238	205.023	200.044	257.197	239.745	222.866
ENSRNOG00000012782_Tmem2	ENSRNOG00000012782	309400	Cemip2	1	239398043	239474931	0.396315	0.108264	0.610756	U	N	N	651.661	1128.94	1015.83	1360.29	2732.08	491.065	2516.04	1387.18	2435.83	1412.38	1977.26	1383.62
ENSRNOG00000027770_Trpm3	ENSRNOG00000027770	309407	Trpm3	1	240355149	240757583	0.033076	0.89866	0.983317	U	N	N	121.806	147.329	148.725	556.172	399.996	145.881	118.747	196.298	455.716	158.275	337.167	319.596
ENSRNOG00000014215_Klf9	ENSRNOG00000014215	117560	Klf9	1	240908483	240933198	0.461246	0.0463891	0.483878	U	N	N	66.9932	225.788	165.851	116.329	139.876	67.8039	266.224	179.722	231.067	125.301	168.584	246.081
ENSRNOG00000030572_Smc5	ENSRNOG00000030572	293967	Smc5	1	240977898	241046256	-0.297809	0.0903557	0.578891	D	N	N	251.732	341.734	211.82	444.938	404.904	281.489	222.172	229.451	274.927	217.628	298.198	291.737
ENSRNOG00000024620_Mamdc2	ENSRNOG00000024620	NA	Mamdc2	1	241072072	241155537	-0.281474	0.243071	0.754835	D	N	N	4.06019	56.665	55.8844	4.24559	4.08994	10.2733	10.2148	18.3212	11.7673	1.09913	10.1658	20.1198
ENSRNOG00000014891_Ptar1	ENSRNOG00000014891	286972	Ptar1	1	241501679	241557651	-0.0268832	0.909412	0.985452	D	N	N	58.8728	75.8439	83.8267	52.6453	77.7088	28.7653	49.1588	41.877	96.278	31.8748	80.4796	72.7409
ENSRNOG00000014928_Apba1	ENSRNOG00000014928	83589	Apba1	1	241594565	241796513	0.158423	0.547122	0.902552	U	N	N	22.3311	20.0507	18.0272	11.0385	15.5418	2.05466	26.8139	9.59682	7.48829	19.7844	33.039	13.1553
ENSRNOG00000061147_Fam189a2	ENSRNOG00000061147	309415	Fam189a2	1	241822626	241875864	0.0628329	0.809962	0.963902	U	N	N	71.0534	274.607	179.371	96.7994	40.0814	131.498	144.284	93.3508	280.276	60.4522	90.6455	190.364
ENSRNOG00000015030_Tjp2	ENSRNOG00000015030	115769	Tjp2	1	241945841	242083484	0.335247	0.119021	0.628472	U	N	N	529.855	853.462	589.491	601.175	735.37	530.103	1527.11	547.891	990.594	475.924	733.635	883.724
ENSRNOG00000015213_Fxn	ENSRNOG00000015213	499335	Fxn	1	242123975	242152834	-0.252512	0.218446	0.738731	D	N	N	162.408	90.664	105.459	85.7609	77.7088	154.1	92.5718	134.355	85.5805	86.8313	67.7723	69.6455
ENSRNOG00000015232_Pip5k1b	ENSRNOG00000015232	309419	Pip5k1b	1	242168462	242441247	-0.255603	0.297246	0.789887	D	N	N	34.5116	94.1511	59.4899	69.6276	125.152	82.1865	111.086	34.8975	68.4644	37.3705	61.8422	46.4303
ENSRNOG00000051051_Fam122a	ENSRNOG00000051051	309420	Fam122a	1	242372458	242373764	-0.276777	0.0976429	0.596769	D	N	N	73.0835	139.483	122.585	168.125	111.246	139.717	100.233	112.544	88.7897	117.607	93.1869	100.599
ENSRNOG00000025476_Tmem252	ENSRNOG00000025476	361744	Tmem252	1	242572533	242577817	-0.27349	0.275807	0.775598	D	N	N	150.227	96.7664	114.473	61.1365	31.0835	49.3119	85.5491	77.647	27.8136	61.5513	68.6195	51.8472
ENSRNOG00000015406_Pgm5	ENSRNOG00000015406	679990	Pgm5	1	242582642	242765807	-0.414537	0.106424	0.60911	D	N	N	182.709	81.9463	162.245	55.1926	39.2634	84.2412	83.6338	101.203	40.6507	25.28	60.1479	62.681
ENSRNOG00000015516_Cbwd1	ENSRNOG00000015516	171057	Cbwd1	1	242819390	242861767	-0.253434	0.043372	0.474695	D	N	N	97.4446	136.868	127.092	141.803	125.97	110.952	105.34	99.4579	109.115	117.607	95.7284	98.2776
ENSRNOG00000015894_Dock8	ENSRNOG00000015894	499337	Dock8	1	242959488	243153465	0.248524	0.271448	0.772703	U	N	N	406.019	475.986	631.855	454.278	656.026	482.846	628.211	197.171	677.155	938.658	788.7	676.335
ENSRNOG00000030351_Hmgb1-ps4	ENSRNOG00000030351	NA	AABR07006627.1	1	243108432	243109080	-0.00314702	0.984194	0.998133	D	N	N	1611.9	1652.87	1432.26	1721.16	1348.86	2173.83	1317.71	2421.01	1444.17	1593.74	1435.93	1697.03
ENSRNOG00000016023_Kank1	ENSRNOG00000016023	309429	Kank1	1	243276403	243398536	0.100421	0.595603	0.913331	U	N	N	286.244	524.805	308.266	304.833	312.471	254.778	234.941	297.501	484.599	368.209	415.105	369.895
ENSRNOG00000016301_Dmrt2	ENSRNOG00000016301	309430	Dmrt2	1	243662823	243669312	0.23401	0.343352	0.810845	U	N	N	8.12039	20.0507	22.534	0	2.45396	4.10933	15.3222	17.4488	11.7673	12.0904	5.93008	32.5012
ENSRNOG00000011931_Smarca2	ENSRNOG00000011931	361745	Smarca2	1	244615821	244782706	0.196275	0.213321	0.735162	U	N	N	322.785	651.212	567.858	588.438	492.428	595.852	579.052	649.094	701.76	553.962	515.917	752.172
ENSRNOG00000027491_Vldlr	ENSRNOG00000027491	25696	Vldlr	1	245237736	245269205	0.0627641	0.802558	0.962121	U	N	N	278.123	244.095	195.596	368.517	208.587	823.92	266.862	540.911	524.18	194.546	277.867	455.017
ENSRNOG00000012574_Pum3	ENSRNOG00000012574	499339	Pum3	1	245476529	245514252	0.202939	0.133537	0.652642	U	N	N	274.063	336.503	245.17	321.816	318.197	330.801	383.056	267.838	312.369	435.256	380.372	347.454
ENSRNOG00000014486_Rfx3	ENSRNOG00000014486	361746	Rfx3	1	245859633	246110218	0.223554	0.347591	0.813648	U	N	N	16.2408	34.8708	21.6327	29.7191	30.2655	20.5466	33.8366	20.0661	52.418	16.487	33.039	38.692
ENSRNOG00000014768_Glis3	ENSRNOG00000014768	NA	Glis3	1	246380889	246785360	0.300556	0.241821	0.753805	U	N	N	10.1505	29.6402	11.7177	7.64206	4.08994	8.21865	56.8199	10.4693	8.55805	4.39652	27.9561	13.9291
ENSRNOG00000014816_Slc1a1	ENSRNOG00000014816	25550	Slc1a1	1	246954980	247037056	0.0377046	0.883499	0.980914	U	N	N	91.3543	76.7157	81.1226	168.125	83.4347	59.5852	60.012	28.7904	90.9292	122.004	216.024	69.6455
ENSRNOG00000015268_Plpp6	ENSRNOG00000015268	619549	Plpp6	1	247084228	247087077	-0.14808	0.318977	0.802987	D	N	N	332.936	289.427	298.351	288.7	291.203	184.92	282.823	184.084	243.904	247.304	297.351	253.819
ENSRNOG00000010967_Cdc37l1	ENSRNOG00000010967	293886	Cdc37l1	1	247107397	247138155	-0.114649	0.380813	0.832628	D	N	N	221.281	237.121	218.13	267.472	290.385	191.084	211.319	219.854	236.416	171.464	248.216	230.604
ENSRNOG00000052506_Ak3	ENSRNOG00000052506	26956	Ak3	1	247144491	247169693	-0.176178	0.213942	0.735162	D	N	N	775.497	966.792	1054.59	969.692	1077.29	943.091	1046.38	960.554	946.734	600.125	802.255	716.575
ENSRNOG00000015491_Rcl1	ENSRNOG00000015491	309301	Rcl1	1	247228061	247305693	-0.0770808	0.589308	0.911336	D	N	N	511.584	536.138	609.321	539.19	566.047	534.213	513.294	421.387	492.088	668.272	642.99	377.633
ENSRNOG00000059968_Jak2	ENSRNOG00000059968	24514	Jak2	1	247398598	247458509	0.0344198	0.880687	0.980398	U	N	N	836.4	938.024	1245.68	1797.58	2074.42	725.296	1464.55	647.349	1341.47	1508.01	1805.29	1105.82
ENSRNOG00000015932_Plgrkt	ENSRNOG00000015932	293888	Plgrkt	1	247502280	247514540	-0.325871	0.072382	0.5462	D	N	N	182.709	100.253	102.755	147.746	123.516	162.318	91.2949	128.248	80.2317	130.797	109.283	84.3485
ENSRNOG00000016112_Cd274	ENSRNOG00000016112	499342	Cd274	1	247519939	247537943	0.285366	0.277748	0.775843	U	N	N	58.8728	59.2803	59.4899	73.0241	157.054	18.492	127.685	18.3212	84.5107	239.611	111.824	61.1333
ENSRNOG00000016136_Pdcd1lg2	ENSRNOG00000016136	309304	Pdcd1lg2	1	247562202	247627193	0.031528	0.900573	0.983317	U	N	N	14.2107	2.61531	6.30953	9.34029	5.72591	0	9.57639	2.61731	1.06976	12.0904	10.1658	4.64303
ENSRNOG00000016172_Ric1	ENSRNOG00000016172	309306	Ric1	1	247688789	247781875	0.242759	0.237177	0.750867	U	N	N	136.016	257.172	218.13	263.226	335.375	145.881	249.625	214.62	365.856	198.943	314.294	335.846
ENSRNOG00000010915_Ermp1	ENSRNOG00000010915	373544	Ermp1	1	247787582	247821728	-0.0649771	0.693373	0.942315	D	N	N	2028.07	1786.26	1925.31	1163.29	1255.61	2173.83	1583.93	1775.41	1649.56	1654.19	1217.36	1931.5
ENSRNOG00000026942_RGD1311595	ENSRNOG00000026942	309307	RGD1311595	1	247900136	247978540	0.0423188	0.839254	0.971601	U	N	N	105.565	277.223	164.048	253.037	293.657	189.029	197.274	174.488	298.462	178.059	206.706	283.225
ENSRNOG00000053859_Ranbp6	ENSRNOG00000053859	309326	Ranbp6	1	247982180	247985497	-0.158013	0.471119	0.871328	D	N	N	87.2941	135.996	103.657	180.013	195.499	63.6946	109.809	86.3713	136.929	83.534	141.475	114.528
ENSRNOG00000016456_Il33	ENSRNOG00000016456	361749	Il33	1	248132090	248147029	0.260255	0.314099	0.799357	U	N	N	4602.23	2427.88	5682.19	6178.18	2896.49	1818.38	18428.8	1151.62	4277.95	905.684	9622.82	2076.21
ENSRNOG00000011308_Uhrf2	ENSRNOG00000011308	309331	Uhrf2	1	248228496	248291978	-0.144024	0.409438	0.846309	D	N	N	464.892	686.082	569.661	735.336	871.156	429.425	440.514	515.611	664.318	473.725	661.627	606.69
ENSRNOG00000011599_Gldc	ENSRNOG00000011599	309312	Gldc	1	248297331	248377093	-0.0955594	0.685523	0.940229	D	N	N	8.12039	14.8201	11.7177	35.6629	239.67	2.05466	23.6218	84.6265	67.3946	21.9826	27.1089	23.2152
ENSRNOG00000050289_Cstf2t	ENSRNOG00000050289	309338	Cstf2t	1	249574954	249578520	-0.160091	0.308205	0.797012	D	N	N	580.608	572.752	540.817	413.52	345.191	484.901	492.865	505.141	390.461	468.23	309.211	426.385
ENSRNOG00000053728_AABR07006724.1	ENSRNOG00000053728	NA	AABR07006724.1	1	250105678	250200076	0.229053	0.380231	0.832391	U	N	N	18.2709	11.333	23.4354	7.64206	23.7216	18.492	11.4917	6.10706	34.2322	27.4783	36.4276	21.6675
ENSRNOG00000012196_Asah2	ENSRNOG00000012196	114104	Asah2	1	250557044	250630677	-0.443455	0.0288394	0.403438	D	N	N	32.4815	62.7674	47.7722	52.6453	81.7987	59.5852	50.4356	37.5148	40.6507	32.9739	28.8032	43.335
ENSRNOG00000012536_Sgms1	ENSRNOG00000012536	353229	Sgms1	1	250691370	250951697	-0.246248	0.14394	0.666823	D	N	N	623.24	780.234	887.841	738.732	640.484	542.431	564.369	369.041	805.526	533.079	585.383	622.94
ENSRNOG00000011287_Minpp1	ENSRNOG00000011287	29688	Minpp1	1	251045440	251071040	0.158312	0.235591	0.750348	U	N	N	726.775	673.006	759.848	545.983	718.193	721.187	979.984	558.36	793.759	792.473	768.369	764.553
ENSRNOG00000011068_Papss2	ENSRNOG00000011068	294103	Papss2	1	251145253	251230715	0.030489	0.901546	0.983317	U	N	N	160.378	194.405	231.65	106.989	130.06	63.6946	207.488	140.462	57.7668	246.205	113.519	152.446
ENSRNOG00000010861_Atad1	ENSRNOG00000010861	309532	Atad1	1	251235508	251387002	0.0129799	0.939945	0.990181	U	N	N	1205.88	883.102	1105.97	785.434	1266.24	918.435	1301.11	836.668	862.223	1473.93	897.136	856.64
ENSRNOG00000020723_Pten	ENSRNOG00000020723	50557	Pten	1	251421596	251487832	-0.0606915	0.775846	0.954898	D	N	N	673.992	608.495	747.229	401.633	1253.16	517.775	937.209	494.672	752.038	529.781	627.741	646.156
ENSRNOG00000020705_Rnls	ENSRNOG00000020705	361751	Rnls	1	251828290	252100759	-0.23888	0.2784	0.775887	D	N	N	119.776	47.9473	77.5171	49.2488	52.3512	63.6946	70.2269	47.1116	40.6507	65.9479	64.3837	37.1443
ENSRNOG00000019190_Ankrd22	ENSRNOG00000019190	294093	Ankrd22	1	252429677	252461461	0.437249	0.0945065	0.589109	U	N	N	26.3913	20.9225	13.5204	11.0385	16.3597	34.9293	106.617	13.959	22.4649	31.8748	17.7902	27.8582
ENSRNOG00000050224_Stambpl1	ENSRNOG00000050224	687696	Stambpl1	1	252497452	252536104	-0.026653	0.855618	0.974669	D	N	N	166.468	146.457	134.303	170.673	134.15	141.772	119.386	159.656	129.44	170.365	180.444	116.85
ENSRNOG00000058039_Acta2	ENSRNOG00000058039	81633	Acta2	1	252537615	252550394	-0.530168	0.0419768	0.469925	D	N	N	15607.4	12170.8	10637.9	13038.2	12646.1	46912.1	7719.85	15067.9	11603.6	2159.79	5387.05	15093.7
ENSRNOG00000019142_Fas	ENSRNOG00000019142	246097	Fas	1	252589785	252624790	-0.28605	0.230818	0.745503	D	N	N	162.408	133.381	204.609	129.915	152.964	205.466	143.646	43.6219	116.603	227.52	143.169	72.7409
ENSRNOG00000019141_Ch25h	ENSRNOG00000019141	309527	Ch25h	1	252807065	252808380	0.251176	0.305171	0.794228	U	N	N	32.4815	18.3072	33.3504	47.5506	31.9015	32.8746	29.3676	37.5148	25.6741	90.1287	33.8862	38.692
ENSRNOG00000019077_Lipa	ENSRNOG00000019077	25055	Lipa	1	252816527	252849904	0.0755492	0.723825	0.945853	U	N	N	1047.53	674.749	1133.91	458.523	464.617	1062.26	1003.61	580.171	834.409	968.334	725.164	1053.19
ENSRNOG00000036604_Ifit2	ENSRNOG00000036604	294091	Ifit2	1	252894663	252900726	0.516454	0.0484472	0.491267	U	N	N	123.836	325.17	278.521	241.999	161.961	454.081	296.23	285.287	234.276	1741.02	257.535	379.955
ENSRNOG00000022839_Ifit3	ENSRNOG00000022839	309526	Ifit3	1	252906234	252911382	0.665333	NA	NA	U	NA	NA	28.4214	85.4334	64.8981	34.8138	40.8994	145.881	82.9954	100.33	54.5575	1025.49	67.7723	147.803
ENSRNOG00000036603_Ifit1bl	ENSRNOG00000036603	294090	Ifit1bl	1	252914684	252922486	0.439246	0.0939961	0.588048	U	N	N	2.0301	4.35885	8.11226	5.09471	6.5439	6.16399	7.02269	5.23463	3.20927	26.3791	10.1658	13.9291
ENSRNOG00000021916_Slc16a12	ENSRNOG00000021916	309525	Slc16a12	1	252976644	253000760	0.255583	0.325616	0.804764	U	N	N	38.5718	68.8698	108.163	29.7191	40.8994	22.6013	107.894	34.8975	130.51	46.1635	60.1479	43.335
ENSRNOG00000018944_Pank1	ENSRNOG00000018944	294088	Pank1	1	253119112	253185533	0.172387	0.393883	0.838238	U	N	N	91.3543	74.9722	45.9695	58.5891	96.5225	88.3505	75.9727	124.759	70.6039	83.534	64.3837	102.921
ENSRNOG00000018929_Kif20b	ENSRNOG00000018929	309523	Kif20b	1	253221812	253275490	0.0705266	0.785295	0.957435	U	N	N	107.595	95.0229	27.0409	103.592	116.154	201.357	33.8366	113.417	109.115	107.715	127.073	212.806
ENSRNOG00000018925_AC117330.1	ENSRNOG00000018925	NA	AC117330.1	1	253296796	253298364	0.0533588	0.825104	0.96807	U	N	N	16.2408	18.3072	20.7313	33.9647	44.9893	20.5466	18.5144	21.8109	26.7439	40.6678	36.4276	23.989
ENSRNOG00000058277_AC080157.1	ENSRNOG00000058277	NA	AC080157.1	1	254530121	254575074	-0.504412	0.0514212	0.498728	D	N	N	44.6621	165.636	105.459	351.535	216.767	65.7492	59.3736	71.5399	115.534	58.2539	96.5756	124.588
ENSRNOG00000018827_Htr7	ENSRNOG00000018827	65032	LOC103694905	1	254547620	254671778	0.202441	0.431751	0.856229	U	N	N	52.7825	23.5378	50.4763	37.3612	38.4454	20.5466	44.0514	16.5763	26.7439	96.7235	66.9252	31.7274
ENSRNOG00000018718_Rpp30	ENSRNOG00000018718	685332	Rpp30	1	254697247	254720087	-0.354989	0.0497199	0.494416	D	N	N	182.709	111.586	123.487	112.933	101.43	162.318	81.7185	102.948	75.9527	112.111	83.8683	132.326
ENSRNOG00000018598_Ankrd1	ENSRNOG00000018598	27064	Ankrd1	1	254726969	254735548	0.462613	NA	NA	U	NA	NA	8.12039	6.97415	9.01362	16.9824	4.90792	12.328	10.2148	16.5763	278.136	0	9.31869	6.19071
ENSRNOG00000018532_Pcgf5	ENSRNOG00000018532	681178	Pcgf5	1	254974789	255086207	0.244787	0.233065	0.748733	U	N	N	89.3242	79.331	77.5171	59.4382	89.1606	55.4759	79.8032	64.5604	89.8595	162.671	86.4097	75.0624
ENSRNOG00000056753_Hectd2	ENSRNOG00000056753	309514	Hectd2	1	255185629	255254307	-0.586091	0.000453213	0.046519	D	Y	Y	154.287	151.688	150.527	247.093	154.6	110.952	97.0407	107.31	95.2083	94.5253	113.519	109.885
ENSRNOG00000018494_Ppp1r3c	ENSRNOG00000018494	309513	Ppp1r3c	1	255371810	255376833	-0.117117	0.633728	0.924725	D	N	N	56.8427	176.097	77.5171	135.859	50.7152	217.794	81.7185	93.3508	143.347	81.3357	105.894	126.91
ENSRNOG00000052664_Tnks2	ENSRNOG00000052664	100910717	LOC100910717	1	255479261	255532143	-0.0735047	0.503893	0.886264	D	N	N	1735.73	1792.36	1928.01	1566.62	1575.44	1454.7	1859.73	1300.8	1611.05	1456.35	1551.14	1752.75
ENSRNOG00000022796_Fgfbp3	ENSRNOG00000022796	499349	Fgfbp3	1	255555050	255557055	-0.248408	0.303681	0.793766	D	N	N	8.12039	19.1789	24.3368	31.4174	31.0835	20.5466	15.9606	25.3007	24.6044	15.3878	11.8602	16.2506
ENSRNOG00000017938_Btaf1	ENSRNOG00000017938	368042	Btaf1	1	255564409	255654932	0.169191	0.340271	0.80959	U	N	N	243.612	375.733	289.337	481.45	499.79	279.434	342.835	351.592	462.134	426.463	437.131	475.911
ENSRNOG00000020689_Cpeb3	ENSRNOG00000020689	309510	Cpeb3	1	255665238	255815733	0.24365	0.35619	0.818988	U	N	N	2.0301	24.4095	20.7313	5.94382	13.9058	12.328	17.2375	20.9385	35.3019	7.69392	13.5545	18.5721
ENSRNOG00000017396_March5	ENSRNOG00000017396	294079	March5	1	255842783	255863142	-0.0518176	0.731192	0.946393	D	N	N	706.474	612.854	655.29	425.408	553.777	525.994	712.483	480.713	453.576	625.406	475.253	591.987
ENSRNOG00000016833_Ide	ENSRNOG00000016833	25700	Ide	1	255914447	256013495	0.137215	0.222275	0.741446	U	N	N	846.55	837.77	886.94	693.729	832.711	899.943	1084.05	727.613	922.129	859.52	900.525	1019.15
ENSRNOG00000056069_Kif11	ENSRNOG00000056069	171304	Kif11	1	256035866	256088299	-0.00200493	0.993508	0.998574	D	N	N	408.049	231.019	122.585	202.939	229.036	482.846	113.64	308.843	210.742	276.981	310.058	445.731
ENSRNOG00000016595_Hhex	ENSRNOG00000016595	79237	Hhex	1	256101903	256107649	-0.194491	0.420691	0.849862	D	N	N	142.107	77.5875	143.317	67.0803	49.8972	76.0226	81.0801	75.9021	40.6507	136.292	67.7723	54.9426
ENSRNOG00000036601_Exoc6	ENSRNOG00000036601	50556	Exoc6	1	256226179	256368813	0.210301	0.28308	0.777781	U	N	N	140.077	127.278	146.021	122.273	226.582	106.843	254.732	129.121	130.51	187.951	165.195	171.018
ENSRNOG00000016117_Myof	ENSRNOG00000016117	309499	Myof	1	256585410	256734730	0.0540126	0.796572	0.960723	U	N	N	661.811	1660.72	851.787	1296.6	875.246	889.669	1224.5	666.542	1399.24	784.779	1130.95	1333.32
ENSRNOG00000016377_Cep55	ENSRNOG00000016377	294074	Cep55	1	256745288	256760796	-0.114477	0.651603	0.929917	D	N	N	121.806	81.9463	38.7586	102.743	77.7088	149.99	30.6444	109.927	51.3483	73.6418	77.9382	157.863
ENSRNOG00000021763_Ffar4	ENSRNOG00000021763	294075	Ffar4	1	256786124	256804156	-0.0825846	0.752977	0.949111	D	N	N	6.09029	10.4612	12.6191	8.49118	8.17987	8.21865	9.57639	4.36219	3.20927	17.5861	5.93008	9.28607
ENSRNOG00000015518_Rbp4	ENSRNOG00000015518	25703	Rbp4	1	256806472	256813711	0.255545	0.265434	0.770646	U	N	N	129.926	235.378	163.147	2.54735	3.27195	41.0933	261.755	133.483	119.813	168.167	11.013	433.35
ENSRNOG00000015235_Fra10ac1	ENSRNOG00000015235	365458	Fra10ac1	1	256881771	256914260	-0.139311	0.339781	0.80959	D	N	N	91.3543	130.765	109.966	148.596	128.424	119.17	116.832	131.738	94.1385	111.012	90.6455	116.85
ENSRNOG00000014758_Lgi1	ENSRNOG00000014758	252892	Lgi1	1	256955652	256999253	0.466772	0.0266405	0.392756	U	N	N	6.09029	10.4612	10.8163	0.849118	20.4497	0	0.638426	81.1367	38.5112	61.5513	3.38862	28.632
ENSRNOG00000029740_Slc35g1	ENSRNOG00000029740	294072	Slc35g1	1	257076221	257082655	0.292656	0.268113	0.77118	U	N	N	10.1505	13.0765	17.1259	9.34029	24.5396	6.16399	38.944	7.85194	17.1161	25.28	28.8032	5.41687
ENSRNOG00000014276_Plce1	ENSRNOG00000014276	114633	Plce1	1	257157264	257466064	0.131961	0.61597	0.919357	U	N	N	58.8728	486.447	191.089	201.241	40.8994	156.154	245.156	126.503	491.018	139.59	157.571	205.841
ENSRNOG00000013965_Noc3l	ENSRNOG00000013965	361753	Noc3l	1	257469538	257498844	0.210171	0.109567	0.611443	U	N	N	241.581	293.786	255.987	241.999	241.306	240.396	314.744	201.533	331.624	300.063	325.307	301.797
ENSRNOG00000036598_LOC685933	ENSRNOG00000036598	685933	LOC685933	1	257517242	257883971	0.0423899	0.839883	0.971946	U	N	N	32.4815	65.3827	39.6599	49.2488	41.7173	36.9839	54.2662	32.2802	48.139	29.6765	57.6065	56.4903
ENSRNOG00000047692_LOC100911660	ENSRNOG00000047692	294071	Hells	1	257614731	257791728	-0.168962	0.451963	0.863759	D	N	N	166.468	157.79	73.0103	93.4029	91.6145	143.826	67.6731	68.0501	78.0922	149.482	116.06	139.291
ENSRNOG00000047104_Hells	ENSRNOG00000047104	294071	LOC100911660	1	257766691	257949183	0.102507	0.424417	0.85144	U	N	N	0	0	0	0	25.3576	0	6.38426	0	14.9766	19.7844	0	32.5012
ENSRNOG00000015267_Aldh18a1	ENSRNOG00000015267	361755	Aldh18a1	1	259057402	259089642	-0.125364	0.196952	0.724264	D	N	N	0	217.942	347.926	303.984	311.653	528.049	0	10.4693	0	239.611	0	0
ENSRNOG00000047112_LOC100912537	ENSRNOG00000047112	100912537	LOC100912537	1	259097455	259106948	0.0665154	0.690093	0.94094	U	N	N	50.7524	41.8449	41.4626	38.2103	44.1713	45.2026	56.1815	40.1321	48.139	43.9652	40.6634	41.7873
ENSRNOG00000016166_Pdlim1	ENSRNOG00000016166	54133	Pdlim1	1	259308296	259357056	-0.172239	0.351495	0.815961	D	N	N	777.527	590.188	723.794	585.042	329.649	497.229	649.279	492.927	387.252	556.16	547.262	410.135
ENSRNOG00000015658_Sorbs1	ENSRNOG00000015658	686098	Sorbs1	1	259376933	259484569	0.338122	0.0975706	0.596769	U	N	N	93.3844	104.612	82.9253	65.3821	99.7944	125.334	118.747	143.08	144.417	65.9479	103.353	180.305
ENSRNOG00000060047_LOC108348083	ENSRNOG00000060047	361755	LOC108348083	1	259641676	259674425	0.467267	0.0412813	0.469163	U	N	N	834.37	288.556	315.477	211.43	302.655	373.949	738.659	535.677	470.692	785.879	534.554	513.055
ENSRNOG00000060994_Tctn3	ENSRNOG00000060994	309486	Tctn3	1	259682249	259691742	0.0665154	0.690093	0.94094	U	N	N	50.7524	41.8449	41.4626	38.2103	44.1713	45.2026	56.1815	40.1321	48.139	43.9652	40.6634	41.7873
ENSRNOG00000014574_Entpd1	ENSRNOG00000014574	64519	Entpd1	1	259739955	259819494	0.00167866	0.994318	0.999109	U	N	N	1112.49	1631.95	1801.82	630.045	626.578	766.39	1180.45	1601.8	757.387	1420.08	654.003	968.073
ENSRNOG00000048973_NEWGENE_1306399	ENSRNOG00000048973	294053	NEWGENE_1306399	1	259926537	259944271	-0.0484317	0.853279	0.974163	D	N	N	0	137.74	95.5444	152.841	176.685	71.9132	107.256	148.314	82.3712	70.3444	105.047	78.1577
ENSRNOG00000014551_Ccnj	ENSRNOG00000014551	294053	Ccnj	1	260093641	260111254	-0.121942	0.510672	0.888315	D	N	N	91.3543	0	0	10.1894	18.8137	30.82	0	0.872438	23.5346	24.1809	21.1789	15.4768
ENSRNOG00000036592_Zfp518a	ENSRNOG00000036592	309478	Zfp518a	1	260153645	260178349	-0.34792	0.0455042	0.480979	D	N	N	107.595	196.148	158.64	172.371	221.674	160.264	128.324	102.075	144.417	105.517	125.379	171.792
ENSRNOG00000013967_Blnk	ENSRNOG00000013967	499356	Blnk	1	260186967	260254600	-0.242414	0.346845	0.812962	D	N	N	142.107	636.392	159.541	294.644	157.054	98.6239	154.499	199.788	135.859	314.351	203.317	121.493
ENSRNOG00000013443_Tm9sf3	ENSRNOG00000013443	309475	Tm9sf3	1	260469043	260517323	-0.0713149	0.744497	0.947826	D	N	N	2196.56	1602.31	2115.5	784.585	1372.58	1056.1	2177.67	911.697	1203.48	1307.97	1305.46	1656.02
ENSRNOG00000013309_Pik3ap1	ENSRNOG00000013309	294048	Pik3ap1	1	260527781	260638915	0.134648	0.575263	0.909282	U	N	N	336.996	379.22	341.616	268.321	195.499	369.839	303.891	130.866	279.206	754.004	371.901	319.596
ENSRNOG00000042679_Lcor	ENSRNOG00000042679	365462	AABR07006860.1	1	260732485	260830854	-0.124887	0.606863	0.917475	D	N	N	71.0534	163.021	133.402	144.35	190.591	57.5306	113.001	72.4123	145.487	51.6592	137.239	156.315
ENSRNOG00000048166_Arhgap19	ENSRNOG00000048166	679082	Arhgap19	1	261015123	261051498	-0.127159	0.588404	0.911336	D	N	N	290.304	191.789	181.174	185.108	107.156	293.817	112.363	152.677	253.532	106.616	163.501	311.857
ENSRNOG00000055976_AABR07006866.1	ENSRNOG00000055976	NA	AABR07006866.1	1	261072895	261073736	0.0346631	0.895593	0.983317	U	N	N	6.09029	11.333	8.11226	5.09471	1.63597	2.05466	7.02269	5.23463	5.34878	6.59479	5.08292	7.73839
ENSRNOG00000045543_Frat2	ENSRNOG00000045543	679110	Frat2	1	261089745	261090437	0.386522	0.131999	0.649475	U	N	N	6.09029	13.9483	20.7313	21.2279	4.90792	12.328	18.5144	13.959	31.0229	15.3878	21.1789	25.5367
ENSRNOG00000048495_Rrp12	ENSRNOG00000048495	679127	Rrp12	1	261106760	261140389	0.314172	0.0597248	0.52242	U	N	N	243.612	194.405	169.456	219.921	236.398	170.537	324.959	192.809	258.881	356.118	228.732	217.449
ENSRNOG00000050585_Pgam1	ENSRNOG00000050585	24642	Pgam1	1	261158261	261165808	0.0257496	0.88326	0.980914	U	N	N	5337.12	3636.15	3600.94	4396.73	3860.9	5274.32	4620.29	3238.49	3587.96	6316.71	5453.13	3421.14
ENSRNOG00000048708_Exosc1	ENSRNOG00000048708	679140	Exosc1	1	261170229	261179790	-0.173106	0.205028	0.730691	D	N	N	99.4747	75.8439	88.3335	80.6662	85.8886	90.4052	83.6338	77.647	82.3712	78.0383	63.5366	67.324
ENSRNOG00000046530_Zdhhc16	ENSRNOG00000046530	654495	Zdhhc16	1	261180007	261191367	-0.130706	0.444252	0.862269	D	N	N	487.223	255.428	268.606	255.584	292.021	378.058	252.178	379.51	264.23	295.666	269.395	273.939
ENSRNOG00000046769_Mms19	ENSRNOG00000046769	171124	Mms19	1	261191646	261229046	0.0825793	0.523932	0.894396	U	N	N	391.809	346.964	381.276	422.861	421.263	302.036	393.27	307.971	463.204	414.372	471.865	367.574
ENSRNOG00000013813_Ubtd1	ENSRNOG00000013813	309373	Ubtd1	1	261229347	261280536	0.0794149	0.544068	0.901931	U	N	N	203.01	156.047	198.3	157.087	172.595	201.357	232.387	198.916	155.115	193.447	192.304	170.245
ENSRNOG00000029501_Hoga1	ENSRNOG00000029501	293949	Hoga1	1	261291870	261318984	0.26895	0.14155	0.663812	U	N	N	87.2941	40.1014	63.0953	72.175	94.8865	57.5306	96.4023	82.0091	82.3712	93.4261	78.7853	81.2531
ENSRNOG00000027156_Morn4	ENSRNOG00000027156	293950	Morn4	1	261323083	261333383	0.0209518	0.918827	0.987807	U	N	N	160.378	87.1769	97.3471	87.4591	200.407	96.5692	143.646	153.549	121.952	106.616	117.754	97.5037
ENSRNOG00000014675_Pi4k2a	ENSRNOG00000014675	114554	Pi4k2a	1	261337594	261362509	0.356125	0.0552245	0.51229	U	N	N	115.715	107.228	107.262	91.7047	148.874	57.5306	152.584	95.9682	134.789	160.473	160.112	142.386
ENSRNOG00000014828_Avpi1	ENSRNOG00000014828	171386	Avpi1	1	261365590	261371508	-0.0149582	0.934998	0.989544	D	N	N	332.936	235.378	248.776	337.949	321.469	392.441	418.807	393.469	229.997	246.205	330.39	219.77
ENSRNOG00000042620_Marveld1	ENSRNOG00000042620	309375	Marveld1	1	261389804	261393736	-0.0154708	0.911495	0.985452	D	N	N	820.159	570.137	746.328	541.737	612.672	678.039	623.104	832.306	612.97	547.367	569.288	727.409
ENSRNOG00000014903_Zfyve27	ENSRNOG00000014903	309376	Zfyve27	1	261415191	261438539	0.143983	0.277203	0.775843	U	N	N	267.973	339.99	279.422	394.84	384.454	304.09	409.869	377.766	418.274	306.658	371.901	319.596
ENSRNOG00000015220_Crtac1	ENSRNOG00000015220	171438	Crtac1	1	261514141	261669586	0.310406	0.185006	0.713234	U	N	N	24.3612	9.58946	27.0409	2.54735	5.72591	0	31.9213	2.61731	11.7673	58.2539	5.93008	37.9181
ENSRNOG00000051256_R3hcc1l	ENSRNOG00000051256	NA	R3hcc1l	1	261753364	261831703	0.130847	0.521622	0.893403	U	N	N	48.7223	86.3052	58.5885	81.5153	90.7966	51.3666	88.1028	53.2187	81.3014	54.9565	87.2569	107.564
ENSRNOG00000015727_Loxl4	ENSRNOG00000015727	309380	Loxl4	1	261835992	261853495	0.380555	0.144623	0.666853	U	N	N	123.836	395.783	151.429	377.857	171.777	180.81	165.352	71.5399	590.505	428.661	494.738	500.674
ENSRNOG00000015807_Pyroxd2	ENSRNOG00000015807	309381	Pyroxd2	1	261961379	261986759	-0.0434949	0.838756	0.971543	D	N	N	117.746	166.508	121.684	268.321	127.606	293.817	179.398	235.558	172.231	132.995	161.806	169.471
ENSRNOG00000045838_Hps1	ENSRNOG00000045838	114638	Hps1	1	261989178	262015153	0.0982681	0.333504	0.807045	U	N	N	464.892	453.32	415.528	393.991	427.807	452.026	477.543	483.331	420.414	557.259	460.852	393.884
ENSRNOG00000054910_Rn60_1_2620.2	ENSRNOG00000054910	NA	AC096317.2	1	261992430	261993135	0.00899035	0.971234	0.995661	U	N	N	6.09029	13.0765	7.2109	15.2841	9.81584	22.6013	11.4917	11.3417	10.6976	10.9913	17.7902	10.8337
ENSRNOG00000051734_RGD1564887	ENSRNOG00000051734	499363	RGD1564887	1	262861226	262890490	-0.0398058	0.822426	0.966889	D	N	N	0	27.0248	0	19.5297	27.8116	45.2026	0	65.4328	17.1161	10.9913	3.38862	0
ENSRNOG00000051771_AABR07006894.1	ENSRNOG00000051771	NA	AABR07006894.1	1	263002286	263013858	-0.606335	5.87774e-06	0.00241642	D	Y	Y	194.889	156.047	138.81	173.22	131.696	178.756	111.086	108.182	85.5805	98.9218	96.5756	109.885
ENSRNOG00000016356_Got1	ENSRNOG00000016356	24401	Got1	1	263246248	263269762	0.131395	0.504586	0.886722	U	N	N	507.524	227.532	345.222	309.079	416.355	318.473	580.968	302.736	330.555	489.113	366.818	294.059
ENSRNOG00000016751_Slc25a28	ENSRNOG00000016751	688811	Slc25a28	1	263420061	263431290	-0.0525421	0.779377	0.956486	D	N	N	259.852	217.942	188.385	303.984	202.861	244.505	154.499	241.665	213.951	366.011	188.915	194.234
ENSRNOG00000016883_Entpd7	ENSRNOG00000016883	309390	Entpd7	1	263448633	263490308	0.296412	0.147111	0.669443	U	N	N	20.301	25.2813	32.449	28.0209	32.7195	18.492	42.1361	23.5558	40.6507	29.6765	37.2748	34.8228
ENSRNOG00000017230_Cox15	ENSRNOG00000017230	309391	Cox15	1	263494852	263511505	-0.233179	0.0307951	0.413352	D	N	N	371.508	391.424	429.95	405.029	389.362	427.37	393.27	287.032	312.369	391.291	300.74	353.644
ENSRNOG00000017298_Cutc	ENSRNOG00000017298	361760	Cutc	1	263511537	263526307	-0.00642036	0.964099	0.994747	D	N	N	89.3242	75.8439	74.813	87.4591	60.531	80.1319	74.0574	79.3918	70.6039	68.1461	83.8683	83.5746
ENSRNOG00000050742_Dnmbp	ENSRNOG00000050742	309362	Dnmbp	1	263625501	263718745	0.281031	0.17425	0.702046	U	N	N	180.679	336.503	295.647	337.1	202.861	170.537	299.422	177.105	441.809	378.101	318.53	333.525
ENSRNOG00000012911_Erlin1	ENSRNOG00000012911	293939	Erlin1	1	263810439	263845762	0.117815	0.362048	0.822561	U	N	N	436.471	356.554	423.64	315.023	415.537	388.331	475.627	321.057	401.158	506.699	421.883	417.099
ENSRNOG00000022485_Chuk	ENSRNOG00000022485	309361	Chuk	1	263848884	263885169	-0.288867	0.0124642	0.275556	D	N	N	401.959	352.195	384.882	359.177	427.807	289.708	332.62	248.645	280.276	323.144	310.058	304.119
ENSRNOG00000012763_Cwf19l1	ENSRNOG00000012763	365465	Cwf19l1	1	263887015	263910251	-0.0386981	0.774745	0.954686	D	N	N	156.317	206.609	139.711	203.788	202.861	189.029	160.883	164.891	166.882	173.663	216.024	188.817
ENSRNOG00000012684_Bloc1s2	ENSRNOG00000012684	293938	Bloc1s2	1	263913854	263920962	-0.177584	0.36413	0.822561	D	N	N	351.207	205.738	232.551	219.072	232.308	289.708	193.443	220.727	148.696	372.605	201.623	178.757
ENSRNOG00000013279_LOC681458	ENSRNOG00000013279	681458	LOC681458	1	263968134	264004008	0.104089	0.680886	0.938346	U	N	N	0	4.35885	6.30953	11.8876	8.17987	26.7106	5.10741	28.7904	8.55805	6.59479	5.93008	13.1553
ENSRNOG00000046005_Scd2	ENSRNOG00000046005	83792	Scd2	1	264059374	264072433	0.0616945	0.630951	0.923483	U	N	N	13382.4	11331.3	12137.7	10256.5	15908.2	14645.6	15156.2	16189.8	13153.7	11735.4	12083	12963.4
ENSRNOG00000013552_Scd	ENSRNOG00000013552	246074	Scd	1	264160129	264172729	0.812047	0.000904699	0.070366	U	Y	N	466.922	719.21	764.355	214.827	357.46	415.042	2383.88	351.592	1421.71	832.042	263.465	8282.4
ENSRNOG00000025781_Sec31b	ENSRNOG00000025781	309433	Sec31b	1	264268338	264294630	0.213189	0.34153	0.810845	U	N	N	0	0.871769	0.901362	9.34029	3.27195	6.16399	2.5537	2.61731	18.1858	1.09913	11.8602	2.32152
ENSRNOG00000014078_Ndufb8	ENSRNOG00000014078	293991	Ndufb8	1	264298669	264303762	-0.376391	0.0929387	0.584393	D	N	N	1743.85	768.029	1090.65	818.549	674.021	1970.42	734.828	1225.78	685.713	962.839	703.138	696.455
ENSRNOG00000014234_Hif1an	ENSRNOG00000014234	309434	Hif1an	1	264309214	264319267	0.295826	0.178704	0.705984	U	N	N	91.3543	54.0497	73.9117	37.3612	56.4411	49.3119	93.2102	48.8565	115.534	52.7583	70.3138	87.4438
ENSRNOG00000014482_Slf2	ENSRNOG00000014482	499360	Slf2	1	264670841	264733306	-0.0858995	0.631759	0.923709	D	N	N	213.16	473.371	332.603	490.79	444.985	351.347	311.552	312.333	395.81	328.64	349.875	464.303
ENSRNOG00000014650_Sema4g	ENSRNOG00000014650	361764	Sema4g	1	264741911	264753397	-0.0385728	0.881411	0.98061	D	N	N	105.565	135.996	95.5444	176.616	229.854	232.177	53.6278	343.74	149.766	84.6331	77.091	223.639
ENSRNOG00000014890_Mrpl43	ENSRNOG00000014890	309440	Mrpl43	1	264755538	264756546	-0.228485	0.109077	0.610756	D	N	N	462.862	361.784	375.868	382.952	342.737	548.595	351.134	405.684	315.578	402.282	317.683	279.356
ENSRNOG00000014935_Peo1	ENSRNOG00000014935	309441	Twnk	1	264756499	264762892	0.268415	0.081373	0.566803	U	N	N	129.926	186.559	133.402	204.637	215.131	145.881	180.675	231.196	220.37	226.421	176.208	225.961
ENSRNOG00000014969_Lzts2	ENSRNOG00000014969	365468	Lzts2	1	264768105	264776616	0.151102	0.365835	0.822632	U	N	N	330.906	658.186	404.711	680.992	523.512	636.946	625.657	681.374	682.504	549.565	536.249	571.093
ENSRNOG00000015442_Sfxn3	ENSRNOG00000015442	65042	Sfxn3	1	264796812	264805157	0.0539675	0.728075	0.945853	U	N	N	986.627	932.793	1148.34	749.771	1137	628.727	1065.53	938.743	1175.66	778.185	931.022	937.119
ENSRNOG00000016058_Kazald1	ENSRNOG00000016058	293997	Kazald1	1	264827739	264831151	-0.181569	0.451137	0.863759	D	N	N	54.8126	55.7932	53.1804	28.0209	18.8137	26.7106	24.8986	44.4943	45.9995	24.1809	24.5675	34.0489
ENSRNOG00000016280_Btrc	ENSRNOG00000016280	361765	Btrc	1	265157379	265269837	0.162263	0.389555	0.837168	U	N	N	292.334	244.095	261.395	266.623	530.874	223.958	356.242	418.77	388.321	287.972	306.67	325.012
ENSRNOG00000016748_Poll	ENSRNOG00000016748	361767	Poll	1	265290339	265298797	0.19086	0.246143	0.756019	U	N	N	369.478	287.684	316.378	228.413	188.137	332.855	308.998	416.153	289.904	373.705	300.74	297.928
ENSRNOG00000017241_Dpcd	ENSRNOG00000017241	294004	Dpcd	1	265298868	265317860	-0.102276	0.593223	0.912929	D	N	N	223.311	145.585	150.527	191.901	194.681	304.09	165.352	259.986	149.766	225.322	152.488	151.672
ENSRNOG00000046211_Fbxw4	ENSRNOG00000046211	309444	Fbxw4	1	265318526	265420503	0.0361679	0.836496	0.970987	U	N	N	263.913	252.813	220.834	427.955	468.707	326.692	310.913	382.128	324.136	330.838	366.818	307.988
ENSRNOG00000017622_Npm3	ENSRNOG00000017622	502389	Npm3	1	265504575	265506046	-0.21188	0.353256	0.817673	D	N	N	332.936	142.97	209.116	130.764	140.694	297.926	133.431	201.533	129.44	282.477	131.309	146.256
ENSRNOG00000017822_Mgea5	ENSRNOG00000017822	154968	Oga	1	265507451	265542276	-0.0733979	0.637604	0.92551	D	N	N	722.714	1105.4	923.896	1164.99	1309.6	801.319	905.926	978.003	1041.94	704.543	997.947	1081.05
ENSRNOG00000025523_C1H10orf76	ENSRNOG00000025523	103689959	Armh3	1	265575448	265757389	0.0876464	0.555046	0.903791	U	N	N	267.973	188.302	236.157	161.332	229.036	236.286	280.269	176.232	223.579	226.421	233.815	258.462
ENSRNOG00000018433_Hps6	ENSRNOG00000018433	309446	Hps6	1	265761738	265764437	0.0304429	0.8345	0.970469	U	N	N	148.197	127.278	154.133	174.918	166.051	129.444	157.691	183.212	115.534	184.654	150.793	133.874
ENSRNOG00000018468_Ldb1	ENSRNOG00000018468	309447	Ldb1	1	265785409	265798167	-0.00559399	0.974812	0.996067	D	N	N	550.156	829.053	615.63	1153.95	971.769	647.219	669.709	935.253	859.014	624.306	892.9	775.387
ENSRNOG00000018561_Pprc1	ENSRNOG00000018561	294007	Pprc1	1	265809754	265826306	0.270999	0.0356361	0.439511	U	N	N	336.996	345.221	281.225	379.556	388.544	256.833	386.886	329.781	421.484	438.553	464.24	401.622
ENSRNOG00000018704_Nolc1	ENSRNOG00000018704	64896	Nolc1	1	265829108	265839818	0.272254	0.080716	0.564428	U	N	N	609.029	842.129	595.8	861.005	842.527	978.02	926.356	885.524	844.037	1369.52	908.149	896.106
ENSRNOG00000026048_Gbf1	ENSRNOG00000026048	309451	Gbf1	1	265904566	266033156	0.249955	0.0596349	0.521951	U	N	N	773.467	618.956	643.572	579.098	928.415	636.946	902.096	673.522	873.99	837.538	823.434	923.19
ENSRNOG00000019311_Nfkb2	ENSRNOG00000019311	309452	Nfkb2	1	266053002	266059256	0.2035	0.29983	0.792141	U	N	N	676.022	594.547	566.957	661.463	649.482	517.775	641.618	483.331	505.994	1270.6	851.39	592.761
ENSRNOG00000019435_Psd	ENSRNOG00000019435	171381	Psd	1	266059331	266074181	-0.174635	0.508739	0.888315	D	N	N	8.12039	14.8201	3.60545	24.6244	21.2677	6.16399	5.10741	12.2141	16.0463	6.59479	9.31869	14.7029
ENSRNOG00000019509_Fbxl15	ENSRNOG00000019509	309453	Fbxl15	1	266075782	266078023	0.0739725	0.747631	0.947826	U	N	N	40.6019	46.2038	33.3504	62.8347	57.2591	106.843	49.7972	98.5855	43.86	57.1548	65.2309	52.6211
ENSRNOG00000019574_Cuedc2	ENSRNOG00000019574	294009	Cuedc2	1	266078108	266086299	-0.0711769	0.725675	0.945853	D	N	N	215.19	198.763	156.837	201.241	148.056	273.27	135.346	279.18	114.464	246.205	177.902	165.602
ENSRNOG00000019674_Mfsd13a	ENSRNOG00000019674	309454	Mfsd13a	1	266105124	266122358	-0.235497	0.122078	0.632603	D	N	N	233.461	124.663	162.245	203.788	199.589	147.936	130.877	159.656	152.975	137.391	163.501	148.577
ENSRNOG00000019725_Actr1a	ENSRNOG00000019725	294010	Actr1a	1	266123870	266142538	0.0745488	0.556131	0.903791	U	N	N	2080.85	1648.52	1817.15	1299.15	1523.09	1838.92	2069.78	2034.52	1629.24	1820.16	1589.26	1626.61
ENSRNOG00000019807_Sufu	ENSRNOG00000019807	361769	Sufu	1	266143818	266239016	0.265044	0.123527	0.636155	U	N	N	150.227	95.0229	127.993	67.9294	89.1606	84.2412	121.939	109.927	118.743	128.598	138.086	133.1
ENSRNOG00000019968_Trim8	ENSRNOG00000019968	688785	Trim8	1	266255797	266270694	0.170629	0.266139	0.770977	U	N	N	716.624	985.971	830.154	1294.9	1177.9	1054.04	1001.69	1267.65	1261.24	919.973	1375.78	1086.47
ENSRNOG00000019973_Arl3	ENSRNOG00000019973	64664	Arl3	1	266287017	266333105	-0.0739386	0.678241	0.937524	D	N	N	381.658	293.786	363.249	358.328	259.302	392.441	277.715	526.08	252.462	313.252	272.784	283.999
ENSRNOG00000049308_Sfxn2	ENSRNOG00000049308	294011	Sfxn2	1	266333440	266345697	-0.010294	0.967132	0.995466	D	N	N	6.09029	11.333	11.7177	3.39647	8.99786	4.10933	5.74583	1.74488	0	5.49565	12.7073	19.346
ENSRNOG00000020020_Wbp1l	ENSRNOG00000020020	309456	Wbp1l	1	266358728	266415296	0.200654	0.0645	0.532113	U	N	N	785.647	879.615	908.573	673.35	710.013	941.036	1022.76	902.973	1048.36	845.232	903.066	933.25
ENSRNOG00000020076_Borcs7	ENSRNOG00000020076	294012	Borcs7	1	266451021	266464903	0.0318191	0.827883	0.968955	U	N	N	276.093	278.094	273.113	184.259	303.473	262.997	333.258	264.349	233.207	238.511	231.273	311.083
ENSRNOG00000020081_As3mt	ENSRNOG00000020081	140925	As3mt	1	266482858	266514569	-0.00278193	0.988236	0.99829	D	N	N	136.016	133.381	136.106	119.726	121.88	174.646	173.013	152.677	129.44	63.7496	149.099	144.708
ENSRNOG00000020113_Cnnm2	ENSRNOG00000020113	294014	Cnnm2	1	266530477	266649398	0.262403	0.234107	0.749735	U	N	N	95.4145	50.5626	105.459	38.2103	69.5289	82.1865	116.194	65.4328	90.9292	65.9479	89.7983	123.814
ENSRNOG00000020179_Nt5c2	ENSRNOG00000020179	100363253	Nt5c2	1	266659519	266782910	-0.00316551	0.980213	0.996892	D	N	N	438.501	438.5	366.854	302.286	305.927	388.331	364.541	354.21	359.438	451.743	338.014	359.835
ENSRNOG00000020250_Pcgf6	ENSRNOG00000020250	309457	Pcgf6	1	266811420	266830976	-0.390578	0.0108011	0.25596	D	N	N	129.926	134.252	114.473	191.051	145.602	143.826	88.7412	93.3508	100.557	131.896	114.366	112.207
ENSRNOG00000020274_Taf5	ENSRNOG00000020274	294018	Taf5	1	266844480	266859965	0.0885665	0.662764	0.931668	U	N	N	48.7223	81.9463	41.4626	67.9294	61.349	65.7492	45.3282	73.2848	81.3014	56.0557	51.6764	90.5392
ENSRNOG00000020304_Pdcd11	ENSRNOG00000020304	309458	Pdcd11	1	266866931	266908042	0.252451	0.0460616	0.482373	U	N	N	663.842	798.541	601.208	970.541	925.961	735.57	994.029	871.565	1013.06	1009	892.053	891.463
ENSRNOG00000020325_Calhm2	ENSRNOG00000020325	294019	Calhm2	1	266908369	266914093	-0.208533	0.15943	0.684602	D	N	N	332.936	450.705	460.596	398.236	276.48	322.582	318.575	400.449	295.253	336.334	287.185	281.677
ENSRNOG00000020339_Neurl1	ENSRNOG00000020339	309459	Neurl1	1	266952561	267038883	0.233864	0.321252	0.803265	U	N	N	20.301	6.97415	7.2109	3.39647	13.9058	0	1.27685	16.5763	51.3483	7.69392	7.62439	6.96455
ENSRNOG00000020353_Sh3pxd2a	ENSRNOG00000020353	309460	Sh3pxd2a	1	267046361	267245636	0.335539	0.146286	0.668227	U	N	N	119.776	302.504	182.075	185.108	262.574	113.006	202.381	213.747	406.507	147.284	276.172	358.287
ENSRNOG00000020376_Stn1	ENSRNOG00000020376	294025	Stn1	1	267281764	267315729	0.0565534	0.747562	0.947826	U	N	N	119.776	95.8946	92.8403	119.726	152.146	123.28	96.4023	180.595	111.255	124.202	104.2	119.171
ENSRNOG00000011339_Slk	ENSRNOG00000011339	54308	Slk	1	267359830	267412810	0.223068	0.330377	0.806929	U	N	N	274.063	577.983	315.477	544.284	674.839	273.27	590.544	277.435	677.155	381.398	676.029	677.883
ENSRNOG00000012110_Col17a1	ENSRNOG00000012110	294027	Col17a1	1	267417459	267463705	0.299103	0.214502	0.735162	U	N	N	933.844	2950.07	1763.97	2615.28	2952.12	4170.97	2449.64	5758.09	3443.54	2003.72	2742.24	4290.16
ENSRNOG00000012641_Sfr1	ENSRNOG00000012641	294030	Sfr1	1	267483145	267509350	-0.317787	0.0171185	0.326249	D	N	N	984.597	1106.28	1157.35	1164.99	835.983	1189.65	911.034	1083.57	707.109	826.546	692.125	858.961
ENSRNOG00000012801_Gsto2	ENSRNOG00000012801	309465	LOC103690044	1	267607416	267640455	-0.0575661	0.821417	0.966661	D	N	N	0	11.333	0.901362	9.34029	14.7238	12.328	3.19213	13.959	9.6278	6.59479	6.77723	4.64303
ENSRNOG00000028746_Gsto1	ENSRNOG00000028746	114846	Gsto1	1	267607418	267617387	-0.417072	0.0285579	0.402505	D	N	N	1053.62	535.266	807.62	630.045	894.878	879.396	493.503	827.943	386.182	702.345	529.471	465.851
ENSRNOG00000011313_Sorcs1	ENSRNOG00000011313	309533	Sorcs1	1	269973351	270472866	0.0538967	0.836968	0.970987	U	N	N	144.137	129.894	260.494	72.175	187.319	14.3826	225.364	19.1936	166.882	140.689	232.12	95.956
ENSRNOG00000046036_LOC100912218	ENSRNOG00000046036	100912218	Itprip	1	271252447	271275989	0.228542	0.24131	0.752864	U	N	N	107.595	174.354	145.119	134.161	116.972	90.4052	127.685	142.207	104.836	246.205	156.723	160.185
ENSRNOG00000012084_Xpnpep1	ENSRNOG00000012084	170751	Xpnpep1	1	273708212	273758442	-0.00365268	0.981548	0.997422	D	N	N	1246.48	874.385	776.073	685.238	853.978	916.38	941.678	926.529	663.249	1162.88	828.517	804.019
ENSRNOG00000012820_Add3	ENSRNOG00000012820	25230	Add3	1	273854248	273961982	-0.17757	0.387592	0.835889	D	N	N	606.999	1434.93	986.09	573.154	710.013	519.83	701.63	832.306	621.528	601.225	590.466	810.209
ENSRNOG00000034078_Mxi1	ENSRNOG00000034078	25701	Mxi1	1	274030978	274090071	-0.00597341	0.968138	0.995466	D	N	N	448.651	800.284	710.273	858.458	621.67	628.727	796.756	584.533	744.55	651.785	592.161	691.038
ENSRNOG00000014833_Smndc1	ENSRNOG00000014833	287768	Smndc1	1	274096068	274107138	-0.155485	0.0461679	0.483135	D	N	N	361.357	402.757	399.303	394.84	404.086	419.151	367.095	325.419	344.461	391.291	357.499	351.323
ENSRNOG00000014061_Dusp5	ENSRNOG00000014061	171109	Dusp5	1	274245184	274258595	0.0880096	0.594836	0.913279	U	N	N	142.107	189.174	230.749	270.019	265.846	170.537	247.071	211.13	255.672	207.736	266.854	182.626
ENSRNOG00000014173_Smc3	ENSRNOG00000014173	29486	Smc3	1	274309758	274352854	0.17468	0.242922	0.754835	U	N	N	558.277	775.875	626.447	871.195	1000.4	780.772	734.19	726.741	939.245	965.037	888.665	1025.34
ENSRNOG00000014705_Rbm20	ENSRNOG00000014705	309544	Rbm20	1	274391932	274589816	0.0340612	0.893902	0.983317	U	N	N	10.1505	42.7167	35.1531	38.2103	44.1713	41.0933	28.0907	25.3007	73.8131	20.8835	22.026	52.6211
ENSRNOG00000014779_Pdcd4	ENSRNOG00000014779	64031	Pdcd4	1	274625224	274648204	-0.00203162	0.989511	0.99829	D	N	N	1080.01	1816.77	1664.82	1665.12	1733.31	1824.54	2055.09	1372.34	1457.01	1451.95	1395.26	2040.61
ENSRNOG00000015339_Shoc2	ENSRNOG00000015339	309548	Shoc2	1	274688580	274751816	0.152814	0.447418	0.862269	U	N	N	389.779	329.529	420.035	230.111	326.377	152.045	452.644	250.39	313.438	313.252	388.844	385.372
ENSRNOG00000047545_Adra2a	ENSRNOG00000047545	25083	Adra2a	1	274766283	274769081	0.272275	0.300089	0.792141	U	N	N	178.648	131.637	182.976	167.276	206.951	102.733	197.912	771.235	68.4644	79.1374	138.086	150.899
ENSRNOG00000015124_Gpam	ENSRNOG00000015124	29653	Gpam	1	275846819	275906686	0.444207	0.0795993	0.562551	U	N	N	160.378	146.457	156.837	109.536	395.906	84.2412	270.054	220.727	379.763	128.598	215.177	502.995
ENSRNOG00000013993_AABR07007000.1	ENSRNOG00000013993	NA	AABR07007000.1	1	276011416	276012351	0.247234	0.309041	0.79706	U	N	N	16.2408	37.4861	18.0272	19.5297	16.3597	22.6013	19.1528	27.918	37.4414	17.5861	22.026	44.1088
ENSRNOG00000016265_Acsl5	ENSRNOG00000016265	94340	Acsl5	1	276240703	276290008	0.215871	0.133741	0.652642	U	N	N	1025.2	943.254	1034.76	754.866	938.231	1015	1338.14	804.388	1067.62	1421.18	1134.34	951.048
ENSRNOG00000036576_Zdhhc6	ENSRNOG00000036576	361771	Zdhhc6	1	276291417	276309099	-0.0691458	0.561966	0.904874	D	N	N	383.688	346.964	274.915	374.461	317.379	431.479	307.721	372.531	317.717	338.532	311.753	362.157
ENSRNOG00000042786_Vti1a	ENSRNOG00000042786	65277	Vti1a	1	276309927	276490602	-0.0312996	0.859474	0.975481	D	N	N	60.9029	106.356	130.697	117.178	115.336	82.1865	116.832	85.4989	88.7897	87.9305	99.9642	126.91
ENSRNOG00000049232_Tcf7l2	ENSRNOG00000049232	679869	Tcf7l2	1	276659542	276730514	-0.36313	0.129148	0.645472	D	N	N	399.929	1018.23	618.334	844.872	513.696	1218.42	418.169	933.508	504.925	324.244	321.071	728.956
ENSRNOG00000056216_Casp7	ENSRNOG00000056216	64026	Casp7	1	277190964	277242774	0.0881349	0.610411	0.918344	U	N	N	426.32	470.755	430.851	393.141	406.54	396.55	427.107	342.868	379.763	766.094	395.621	398.527
ENSRNOG00000016926_Plekhs1	ENSRNOG00000016926	499377	Plekhs1	1	277261681	277291370	-0.0920591	0.725623	0.945853	D	N	N	22.3311	388.809	68.5035	196.995	61.349	49.3119	176.206	44.4943	104.836	108.814	141.475	111.433
ENSRNOG00000026204_Dclre1a	ENSRNOG00000026204	292127	Dclre1a	1	277335790	277355075	-0.134768	0.505639	0.886787	D	N	N	89.3242	157.79	120.782	215.676	229.854	117.116	114.278	123.014	170.091	126.4	136.392	168.697
ENSRNOG00000016948_Nhlrc2	ENSRNOG00000016948	307986	Nhlrc2	1	277355619	277415907	0.0233168	0.907529	0.984996	U	N	N	198.949	246.711	258.691	301.437	327.195	139.717	261.755	179.722	324.136	163.771	315.988	264.653
ENSRNOG00000017002_Adrb1	ENSRNOG00000017002	24925	Adrb1	1	277537585	277538985	0.213404	0.413079	0.847349	U	N	N	73.0835	22.666	64.8981	50.0979	71.9829	69.8586	94.487	1.74488	100.557	79.1374	149.946	65.7763
ENSRNOG00000051680_Ccdc186	ENSRNOG00000051680	NA	Ccdc186	1	277606995	277629196	0.250935	0.265725	0.770871	U	N	N	91.3543	149.944	106.361	129.066	202.861	55.4759	128.962	105.565	204.323	119.805	176.208	198.877
ENSRNOG00000025581_Vwa2	ENSRNOG00000025581	307988	Vwa2	1	277689729	277730389	0.0944197	0.71959	0.945853	U	N	N	3587.18	2873.35	6548.39	4281.25	4264.17	449.971	5011.64	1162.96	3477.78	5279.13	8556.26	1637.44
ENSRNOG00000017164_Afap1l2	ENSRNOG00000017164	292130	Afap1l2	1	277730760	277827269	0.193966	0.421417	0.849862	U	N	N	231.431	293.786	255.987	440.692	242.942	528.049	207.488	657.818	455.716	408.877	170.278	513.829
ENSRNOG00000046333_Ablim1	ENSRNOG00000046333	NA	AABR07007032.1	1	277853875	278042312	0.313735	0.159678	0.684602	U	N	N	265.943	336.503	419.133	329.458	257.666	156.154	622.465	235.558	443.949	261.593	488.808	297.928
ENSRNOG00000017225_Fam160b1	ENSRNOG00000017225	361774	Fam160b1	1	278198179	278221686	0.198058	0.343412	0.810845	U	N	N	95.4145	178.713	183.878	181.711	214.313	82.1865	194.081	147.442	198.975	147.284	266.854	167.149
ENSRNOG00000017321_Trub1	ENSRNOG00000017321	361775	Trub1	1	278311244	278418336	-0.266078	0.088427	0.576971	D	N	N	83.234	140.355	109.966	171.522	124.334	125.334	98.956	106.437	89.8595	112.111	104.2	110.659
ENSRNOG00000061365_AABR07007055.1	ENSRNOG00000061365	NA	AABR07007055.1	1	278476630	278480271	0.639603	0.00389915	0.160703	U	N	N	6.09029	2.61531	9.91498	0	2.45396	0	7.66111	57.5809	13.9068	23.0817	2.54146	16.2506
ENSRNOG00000017406_Atrnl1	ENSRNOG00000017406	307992	Atrnl1	1	278557792	278815473	0.306465	0.105251	0.607238	U	N	N	156.317	179.584	193.793	78.9679	191.409	154.1	204.296	150.059	189.347	222.024	210.094	250.724
ENSRNOG00000017438_Gfra1	ENSRNOG00000017438	NA	AABR07007068.1	1	279207586	279277339	0.731997	0.00341905	0.152332	U	N	N	66.9932	28.7684	91.0376	16.1332	22.9036	26.7106	54.9046	526.952	99.4873	142.887	24.5675	87.4438
ENSRNOG00000017656_Ccdc172	ENSRNOG00000017656	361776	Ccdc172	1	279633671	279676909	-0.755849	0.00233118	0.126537	D	N	N	22.3311	33.999	22.534	32.2665	36.8094	41.0933	21.7065	6.10706	8.55805	10.9913	24.5675	13.1553
ENSRNOG00000018019_Hspa12a	ENSRNOG00000018019	307997	Hspa12a	1	279946811	280015358	-0.364723	0.158122	0.683972	D	N	N	66.9932	47.9473	41.4626	78.1188	159.507	16.4373	32.5597	37.5148	41.7205	68.1461	55.065	36.3704
ENSRNOG00000018350_Shtn1	ENSRNOG00000018350	292139	Shtn1	1	280130504	280233929	0.338985	0.151336	0.676686	U	N	N	117.746	284.197	143.317	151.143	258.484	76.0226	316.659	120.396	216.091	278.08	261.771	243.759
ENSRNOG00000008890_Slc18a2	ENSRNOG00000008890	25549	Slc18a2	1	280423079	280457148	-0.267592	0.250958	0.758461	D	N	N	54.8126	86.3052	63.0953	183.409	89.1606	55.4759	67.0347	76.7745	47.0692	75.84	63.5366	87.4438
ENSRNOG00000009460_Pdzd8	ENSRNOG00000009460	308000	Pdzd8	1	280458041	280515650	0.176695	0.229345	0.744744	U	N	N	667.902	800.284	652.586	802.416	804.899	521.885	730.359	574.936	834.409	944.153	845.46	942.536
ENSRNOG00000009482_Emx2	ENSRNOG00000009482	499380	Emx2	1	280633938	280640946	-0.361833	0.164643	0.68988	D	N	N	109.625	79.331	90.1362	224.167	67.8929	174.646	81.0801	65.4328	136.929	73.6418	108.436	12.3814
ENSRNOG00000009523_Rab11fip2	ENSRNOG00000009523	308003	Rab11fip2	1	281065168	281101438	0.157512	0.384122	0.834798	U	N	N	40.6019	56.665	43.2654	44.1541	49.8972	32.8746	52.9894	39.2597	58.8366	41.767	50.8292	65.0025
ENSRNOG00000009830_Fam204a	ENSRNOG00000009830	308004	Fam204a	1	281347536	281376834	-0.425146	0.0180095	0.33698	D	N	N	83.234	76.7157	73.9117	85.7609	78.5268	67.8039	76.6111	42.7494	37.4414	70.3444	53.3707	50.2995
ENSRNOG00000009954_Cacul1	ENSRNOG00000009954	365493	Cacul1	1	281816407	281874511	-0.0308554	0.823287	0.967354	D	N	N	657.751	655.571	696.753	484.846	538.235	470.518	715.675	502.524	474.972	594.63	544.72	590.439
ENSRNOG00000033843_AABR07007121.1	ENSRNOG00000033843	NA	AABR07007121.1	1	282063929	282064741	-0.234369	0.238591	0.751634	D	N	N	284.214	217.071	285.732	130.764	132.514	228.068	142.369	212.002	167.952	218.727	160.959	144.708
ENSRNOG00000010117_Eif3a	ENSRNOG00000010117	292148	Eif3a	1	282139823	282170017	0.114831	0.336641	0.807222	U	N	N	2442.21	2951.81	2448.1	2675.57	2760.71	2436.83	3333.86	2089.49	2585.6	3169.89	2831.19	3091.49
ENSRNOG00000010230_Fam45a	ENSRNOG00000010230	308009	Fam45a	1	282188110	282210580	-0.208635	0.140258	0.662925	D	N	N	144.137	118.561	132.5	99.3468	131.696	139.717	118.109	97.713	82.3712	115.409	108.436	124.588
ENSRNOG00000036572_Sfxn4	ENSRNOG00000036572	361778	Sfxn4	1	282213675	282235974	-0.412872	0.0572373	0.517941	D	N	N	44.6621	21.7942	27.9422	43.305	31.9015	18.492	18.5144	20.9385	25.6741	18.6852	24.5675	22.4413
ENSRNOG00000010958_Prdx3	ENSRNOG00000010958	64371	Prdx3	1	282238773	282251257	-0.230555	0.180727	0.707861	D	N	N	1571.29	913.614	1166.36	804.114	909.602	1543.05	904.011	917.804	830.13	1203.55	880.193	1010.63
ENSRNOG00000011439_Grk5	ENSRNOG00000011439	59075	Grk5	1	282265370	282462605	0.293961	0.145556	0.666853	U	N	N	99.4747	128.15	187.483	90.8556	77.7088	88.3505	144.923	98.5855	162.603	128.598	177.055	153.994
ENSRNOG00000032668_AABR07007130.1	ENSRNOG00000032668	NA	AABR07007130.1	1	282490698	282492912	-0.288189	0.26187	0.767186	D	N	N	12.1806	52.3062	37.8572	62.8347	43.3533	24.656	24.2602	10.4693	31.0229	21.9826	41.5105	42.5611
ENSRNOG00000036571_Ces2c	ENSRNOG00000036571	171118	Ces2	1	282638017	282702424	-0.56303	0.0230216	0.37168	D	N	N	40.6019	35.7425	57.6872	42.4559	16.3597	84.2412	32.5597	24.4283	28.8834	19.7844	14.4016	30.9536
ENSRNOG00000009997_Erap1	ENSRNOG00000009997	80897	Erap1	2	1410934	1449733	0.035181	0.782921	0.957169	U	N	N	1680.92	1677.28	1823.46	1386.61	1686.69	1538.94	1980.4	1321.74	1541.52	2123.52	1541.82	1544.58
ENSRNOG00000010286_Cast	ENSRNOG00000010286	25403	Cast	2	1452116	1561464	-0.118843	0.463475	0.868125	D	N	N	929.784	1501.19	1260.1	1432.46	1195.08	1267.73	1414.75	716.271	1057.99	1193.66	1154.67	1385.17
ENSRNOG00000027089_Ell2	ENSRNOG00000027089	309918	Ell2	2	2456735	2524237	0.241179	0.212599	0.734988	U	N	N	111.655	228.404	154.133	213.129	211.859	193.138	308.998	137.845	228.928	189.051	266.854	230.604
ENSRNOG00000012183_Glrx	ENSRNOG00000012183	64045	Glrx	2	2605996	2615944	0.237281	0.365837	0.822632	U	N	N	1177.46	578.855	840.069	606.27	611.854	283.544	2618.18	314.95	390.461	959.541	914.926	391.563
ENSRNOG00000012414_Rhobtb3	ENSRNOG00000012414	309922	Rhobtb3	2	2627393	2683116	-0.604788	0.0024748	0.128243	D	N	N	221.281	271.992	185.681	377.008	310.017	392.441	143.007	177.977	193.626	128.598	146.558	266.974
ENSRNOG00000012770_Spata9	ENSRNOG00000012770	294594	Spata9	2	2729829	2766853	-0.461975	0.0600669	0.52276	D	N	N	10.1505	24.4095	33.3504	29.7191	31.9015	10.2733	15.9606	12.2141	22.4649	12.0904	15.2488	13.9291
ENSRNOG00000012810_Rfesd	ENSRNOG00000012810	361871	Rfesd	2	2769400	2779109	-0.169758	0.390754	0.837429	D	N	N	40.6019	49.6909	48.6735	59.4382	62.167	30.82	40.2208	35.7699	58.8366	29.6765	44.052	50.2995
ENSRNOG00000026937_Arsk	ENSRNOG00000026937	365619	Arsk	2	2834355	2891253	-0.321847	0.0241588	0.376213	D	N	N	176.618	181.328	202.806	154.539	148.056	149.99	138.538	128.248	119.813	116.508	115.213	175.661
ENSRNOG00000040297_Ttc37	ENSRNOG00000040297	294595	Ttc37	2	2903492	3004553	0.265719	0.102584	0.605116	U	N	N	243.612	360.912	316.378	363.422	444.985	287.653	422.638	277.435	458.925	386.894	478.642	466.625
ENSRNOG00000013282_Mctp1	ENSRNOG00000013282	309928	Mctp1	2	3400977	4088989	-0.453934	0.0856311	0.570512	D	N	N	10.1505	35.7425	37.8572	50.9471	14.7238	6.16399	15.3222	13.0866	9.6278	4.39652	20.3317	20.8937
ENSRNOG00000062253_Rn60_2_0037.2	ENSRNOG00000062253	NA	AABR07072676.1	2	3657714	3658194	-0.213492	0.339824	0.80959	D	N	N	48.7223	53.1779	42.364	39.0594	20.4497	71.9132	37.6671	45.3668	33.1624	47.2626	31.3447	27.8582
ENSRNOG00000040279_Slf1	ENSRNOG00000040279	294601	Slf1	2	4095129	4195810	0.033571	0.859793	0.975632	U	N	N	77.1437	126.407	72.109	115.48	108.792	90.4052	123.216	70.6675	73.8131	113.21	99.117	130.005
ENSRNOG00000045639_RGD1560883	ENSRNOG00000045639	294603	RGD1560883	2	4195917	4754318	0.165639	0.470793	0.871172	U	N	N	22.3311	20.9225	22.534	16.9824	33.5375	18.492	24.2602	20.9385	31.0229	16.487	24.5675	41.0135
ENSRNOG00000013844_Fam172a	ENSRNOG00000013844	294606	Fam172a	2	4942775	5545144	0.0739911	0.739249	0.947502	U	N	N	127.896	139.483	169.456	53.4944	107.974	84.2412	181.313	79.3918	108.045	109.913	116.06	134.648
ENSRNOG00000014795_Nr2f1	ENSRNOG00000014795	81808	Nr2f1	2	5569935	5579894	0.101664	0.698171	0.942385	U	N	N	48.7223	30.5119	34.2518	4.24559	16.3597	14.3826	19.1528	33.1526	54.5575	23.0817	9.31869	30.9536
ENSRNOG00000045649_Arrdc3	ENSRNOG00000045649	309945	Arrdc3	2	8732932	8743069	-0.0029031	0.989807	0.99829	D	N	N	107.595	324.298	221.735	140.104	115.336	100.679	194.081	131.738	173.3	132.995	194.845	185.721
ENSRNOG00000016306_Adgrv1	ENSRNOG00000016306	100362255	Adgrv1	2	8926850	9504134	-0.225229	0.380494	0.832391	D	N	N	267.973	134.252	82.9253	169.824	33.5375	199.302	8.29954	183.212	24.6044	183.555	48.2878	150.899
ENSRNOG00000016298_Lysmd3	ENSRNOG00000016298	315923	Lysmd3	2	9526209	9534362	-0.4341	0.0108342	0.25596	D	N	N	168.498	200.507	208.215	138.406	130.06	143.826	158.33	106.437	91.999	130.797	99.117	116.076
ENSRNOG00000016260_Polr3g	ENSRNOG00000016260	685465	Polr3g	2	9537642	9578310	-0.111839	0.576815	0.909665	D	N	N	125.866	74.1004	75.7144	101.045	143.966	82.1865	101.51	56.7085	89.8595	79.1374	121.143	99.0514
ENSRNOG00000016252_Mblac2	ENSRNOG00000016252	365627	Mblac2	2	9578345	9623513	-0.63955	5.32753e-05	0.0114415	D	Y	Y	168.498	143.842	174.864	170.673	191.409	129.444	111.725	132.611	105.906	81.3357	74.5496	93.6345
ENSRNOG00000050877_Cetn3	ENSRNOG00000050877	100912538	Cetn3	2	9683570	9696050	-0.129294	0.475783	0.87284	D	N	N	24.3612	0	36.9558	33.9647	0	36.9839	5.10741	16.5763	26.7439	0	0	21.6675
ENSRNOG00000033134_Mef2c	ENSRNOG00000033134	499497	Mef2c	2	11658568	11822787	-0.0238454	0.92297	0.988765	D	N	N	314.665	260.659	340.715	161.332	159.507	579.415	294.314	254.752	575.529	207.736	168.584	266.201
ENSRNOG00000048563_LOC100912538	ENSRNOG00000048563	170895	LOC100912538	2	12102487	12115009	-0.488363	0.00162626	0.10174	D	N	N	312.635	265.018	294.745	321.816	250.304	390.386	222.811	251.262	140.138	246.205	208.4	186.495
ENSRNOG00000032414_Tmem161b	ENSRNOG00000032414	309953	Tmem161b	2	12516702	12549389	-0.108735	0.555736	0.903791	D	N	N	54.8126	75.8439	53.1804	104.441	101.43	67.8039	72.7806	63.688	63.1156	65.9479	81.3268	77.3839
ENSRNOG00000031656_Ccnh	ENSRNOG00000031656	84389	Ccnh	2	13593100	13613910	-0.208123	0.152333	0.680016	D	N	N	249.702	237.993	248.776	209.732	186.501	289.708	199.827	233.813	158.324	241.809	163.501	210.484
ENSRNOG00000029185_Rasa1	ENSRNOG00000029185	25676	Rasa1	2	13616822	13696426	0.116213	0.562422	0.905121	U	N	N	444.591	798.541	677.824	747.223	689.563	386.277	745.681	396.959	838.688	522.087	817.504	817.174
ENSRNOG00000030237_Cox7c	ENSRNOG00000030237	100188937	Cox7c	2	14699882	14701903	-0.419783	0.051688	0.499489	D	N	N	2434.09	1249.25	1682.84	1461.33	1042.12	2730.65	1051.49	1982.18	940.315	1295.88	1013.2	1029.98
ENSRNOG00000032002_Hapln1	ENSRNOG00000032002	29331	Hapln1	2	18354542	18419071	-0.245871	0.269738	0.771929	D	N	N	4.06019	14.8201	19.83	1.69824	7.36188	4.10933	0.638426	4.36219	0	3.29739	0.847154	16.2506
ENSRNOG00000029212_Vcan	ENSRNOG00000029212	114122	Vcan	2	18490102	18565842	-0.335608	0.136616	0.658092	D	N	N	4104.86	3093.04	3339.55	4325.4	4894.83	3725.11	2468.79	1220.54	2491.46	4802.1	1956.08	4335.05
ENSRNOG00000029966_Xrcc4	ENSRNOG00000029966	309995	Xrcc4	2	18677220	18927365	-0.378522	0.0118145	0.268137	D	N	N	85.2641	65.3827	88.3335	97.6485	79.3447	80.1319	56.8199	73.2848	59.9063	69.2452	54.2179	59.5856
ENSRNOG00000016686_Tmem167a	ENSRNOG00000016686	100359823	Tmem167a	2	18937458	18943561	-0.307628	0.214586	0.735162	D	N	N	58.8728	20.0507	36.0545	19.5297	23.7216	53.4213	26.1755	14.8314	16.0463	38.4696	29.6504	23.2152
ENSRNOG00000016580_Rps23	ENSRNOG00000016580	124323	Rps23	2	19823234	19824804	-0.329281	0.123773	0.636972	D	N	N	15997.2	8912.1	13035.5	7700.65	5482.97	12124.6	7651.53	10801.7	6270.91	10459.3	6476.49	5731.05
ENSRNOG00000016342_Atg10	ENSRNOG00000016342	688555	Atg10	2	19853546	20152884	-0.138018	0.333452	0.807045	D	N	N	87.2941	91.5358	100.051	89.1573	72.8008	92.4599	90.0181	85.4989	74.8829	87.9305	62.6894	78.1577
ENSRNOG00000016213_Ssbp2	ENSRNOG00000016213	361877	Ssbp2	2	20431243	20702515	0.120839	0.473153	0.872127	U	N	N	113.685	153.431	184.779	154.539	140.694	147.936	125.77	214.62	205.393	160.473	120.296	164.828
ENSRNOG00000051682_Zcchc9	ENSRNOG00000051682	309986	Zcchc9	2	20909761	20919824	-0.194425	0.0993184	0.598949	D	N	N	162.408	170.867	161.344	180.862	157.054	164.373	122.578	175.36	146.557	127.499	149.946	144.708
ENSRNOG00000056151_AABR07007642.1	ENSRNOG00000056151	NA	AABR07007642.1	2	21559368	21698937	-0.173881	0.505552	0.886787	D	N	N	8.12039	18.3072	16.2245	17.8315	4.08994	4.10933	9.57639	13.959	9.6278	0	7.62439	11.6076
ENSRNOG00000013673_Msh3	ENSRNOG00000013673	499505	Msh3	2	21790044	21931720	0.0773479	0.653154	0.930488	U	N	N	58.8728	82.8181	72.109	74.7223	111.246	90.4052	81.7185	74.1572	109.115	69.2452	103.353	87.4438
ENSRNOG00000013521_Dhfr	ENSRNOG00000013521	24312	Dhfr	2	21931493	21962453	-0.137739	0.523243	0.894021	D	N	N	233.461	155.175	118.98	181.711	154.6	293.817	88.1028	213.747	154.045	211.033	136.392	198.103
ENSRNOG00000024136_Fam151b	ENSRNOG00000024136	499507	Fam151b	2	22023052	22059149	-0.367535	0.0567045	0.516358	D	N	N	46.6922	49.6909	56.7858	72.175	52.3512	53.4213	41.4977	56.7085	28.8834	41.767	28.8032	47.978
ENSRNOG00000013055_Zfyve16	ENSRNOG00000013055	499508	Zfyve16	2	22062050	22105710	-0.0527726	0.74683	0.947826	D	N	N	237.521	286.812	276.718	303.135	390.18	203.412	309.637	202.406	311.299	241.809	254.146	319.596
ENSRNOG00000024039_Serinc5	ENSRNOG00000024039	170907	Serinc5	2	22195600	22310312	-0.257532	0.184702	0.712896	D	N	N	1248.51	1112.38	1287.14	1061.4	1872.37	772.554	896.35	825.326	1383.19	655.082	1068.26	1118.97
ENSRNOG00000012471_Thbs4	ENSRNOG00000012471	29220	Thbs4	2	22343727	22385855	0.144867	0.575922	0.909396	U	N	N	42.632	9.58946	95.5444	10.1894	8.17987	55.4759	28.0907	35.7699	56.6971	64.8487	17.7902	76.6101
ENSRNOG00000023837_Mtx3	ENSRNOG00000023837	688905	Mtx3	2	22427474	22435307	0.153327	0.506501	0.887063	U	N	N	20.301	20.9225	21.6327	14.435	23.7216	12.328	21.0681	11.3417	29.9532	19.7844	27.1089	23.989
ENSRNOG00000023803_Cmya5	ENSRNOG00000023803	688915	Cmya5	2	22646712	22744407	0.286668	NA	NA	U	NA	NA	109.625	4.35885	4.50681	14.435	8.17987	26.7106	5.10741	4.36219	2264.67	6.59479	5.93008	3.8692
ENSRNOG00000012099_Papd4	ENSRNOG00000012099	361878	Tent2	2	22747547	22798214	0.0197993	0.897265	0.983317	U	N	N	217.22	258.044	222.636	202.939	233.126	191.084	226.641	150.932	183.998	271.485	268.548	247.628
ENSRNOG00000047014_Homer1	ENSRNOG00000047014	29546	Homer1	2	22909569	23009678	-0.0518963	0.803928	0.962299	D	N	N	52.7825	46.2038	44.1667	28.0209	58.0771	36.9839	45.3282	27.0456	47.0692	46.1635	56.7593	32.5012
ENSRNOG00000050343_Jmy	ENSRNOG00000050343	NA	Jmy	2	23042189	23097610	0.480472	0.0205232	0.35114	U	N	N	83.234	78.4592	83.8267	45.8523	65.439	55.4759	77.888	82.8816	141.208	67.047	110.977	142.386
ENSRNOG00000011150_Arsb	ENSRNOG00000011150	25227	Arsb	2	23385183	23544963	0.130162	0.386403	0.83561	U	N	N	868.881	1036.53	1152.84	569.758	808.989	910.216	1032.33	972.768	818.363	1067.26	950.507	1061.71
ENSRNOG00000011032_Lhfpl2	ENSRNOG00000011032	294643	Lhfpl2	2	23770721	23852021	-0.0972929	0.617024	0.919357	D	N	N	355.267	343.477	481.327	179.164	301.019	228.068	368.372	249.517	241.765	276.981	329.543	276.261
ENSRNOG00000061582_Scamp1	ENSRNOG00000061582	29521	Scamp1	2	23857995	23941084	-0.177066	0.260197	0.766609	D	N	N	1118.58	726.184	932.91	631.743	926.779	819.811	1001.69	789.556	635.435	772.689	604.021	687.943
ENSRNOG00000010624_Ap3b1	ENSRNOG00000010624	309969	Ap3b1	2	24024791	24226224	0.257678	0.0572942	0.517941	U	N	N	730.835	689.57	651.685	614.761	810.625	589.688	1051.49	606.344	743.48	890.296	809.032	854.318
ENSRNOG00000048342_Tbca	ENSRNOG00000048342	366995	Tbca	2	24449485	24505334	-0.454464	0.0158118	0.309545	D	N	N	1427.16	800.284	1078.03	1089.42	777.088	1563.6	667.155	1137.66	645.063	844.133	695.513	650.799
ENSRNOG00000025462_Wdr41	ENSRNOG00000025462	361879	Wdr41	2	24668116	24717267	-0.114254	0.238194	0.751615	D	N	N	243.612	238.865	240.664	240.3	294.475	254.778	232.387	254.752	213.951	237.412	221.954	234.473
ENSRNOG00000010280_Pde8b	ENSRNOG00000010280	309962	Pde8b	2	24719976	24923128	0.332819	0.205587	0.730691	U	N	N	12.1806	9.58946	9.01362	12.7368	9.81584	14.3826	40.8593	15.7039	17.1161	2.19826	17.7902	10.8337
ENSRNOG00000028941_Zbed3	ENSRNOG00000028941	361881	Zbed3	2	25041185	25052127	-0.0837347	0.624992	0.921793	D	N	N	436.471	489.934	456.99	450.032	221.674	484.901	361.349	467.627	427.902	381.398	323.613	412.456
ENSRNOG00000029304_Aggf1	ENSRNOG00000029304	NA	Aggf1	2	25069620	25095106	0.525361	0.000804842	0.065061	U	Y	N	97.4446	148.201	116.276	107.838	109.61	88.3505	176.206	137.845	202.184	128.598	180.444	184.948
ENSRNOG00000018003_F2rl1	ENSRNOG00000018003	116677	F2rl1	2	25222328	25235275	-0.119562	0.606203	0.917156	D	N	N	487.223	439.372	392.994	516.263	277.298	361.621	532.447	126.503	332.694	414.372	547.262	256.915
ENSRNOG00000016544_Arhgef28	ENSRNOG00000016544	361882	Arhgef28	2	25738514	26011429	0.440086	0.0713827	0.544551	U	N	N	38.5718	92.4075	56.7858	80.6662	58.0771	36.9839	82.9954	198.043	85.5805	50.56	78.7853	76.6101
[truncated: 12,612 more rows]
